# Supplementary material for: Massive dihydrogen uptake by anionic carbon chains
Source: Royal Society of Chemistry journal article supplement (doi:10.1039/c6cp07722f), 2017-01-01
Supplement: c6cp07722f1.pdf [file c6cp07722f1.pdf]

## Massive dihydrogen uptake by anionic carbon chains

*Therese Davis Della and Cherumuttathu H. Suresh\**

Chemical Sciences and Technology Division, Academy of Scientific & Innovative Research, CSIR- National Institute for Interdisciplinary Science and Technology, Thiruvananthapuram, 695 019, India.  
Tel: +91-471-2515472; E-mail: sureshch@niist.res.in

### Supporting Information

#### Table of Contents

- 1. Fig. S1** Optimized geometries of  $H_2$  complexes of  $(C_2)_nH_2$ ,  $n = 1 - 3$  at M06L/6-311++G(d,p) level.
- 2. Fig. S2** Optimized geometries of  $(HC_4)^-(H_2)_m$  complexes at M06L/6-311++G(d,p) level.
- 3. Fig. S3** Optimized geometries of  $(HC_6)^-(H_2)_m$  complexes at M06L/6-311++G(d,p) level.
- 4. Fig. S4** Optimized geometries of  $(C_2)^{2-}(H_2)_m$  complexes at M06L/6-311++G(d,p) level.
- 5. Fig. S5** Optimized geometries of  $(C_4)^{2-}(H_2)_m$  complexes at M06L/6-311++G(d,p) level.
- 6. Fig. S6** Optimized geometries of  $(C_6)^{2-}(H_2)_m$  complexes at M06L/6-311++G(d,p) level.
- 7. Fig. S7** Deprotonation energy versus number of carbons.
- 8. Fig. S8** QTAIM features of  $(HC_n)^-(H_2)_{m_{max}}$  and  $(C_n)^{2-}(H_2)_{m_{max}}$  complexes at M06L/6-311++G(d,p) level.
- 9. Fig. S9** QTAIM features of  $(HC_n)^-(H_2)_{m_{max}+1}$  and  $(C_n)^{2-}(H_2)_{m_{max}+1}$  complexes at M06L/6-311++G(d,p) level.
- 10. Fig. S10** Correlation between  $E_{int}$  and  $\Sigma\rho_{bcp}$  of anionic polyynes complexes at the M06L/6-311++G(d,p) level.
- 11. Fig. S11** Correlation between  $\Sigma\Delta V_n$  and No. of  $H_2$  molecules of anionic polyynes complexes at the M06L/6-311++G(d,p) level.
- 12. Fig. S12** Correlation between  $E_{int}$  and  $\Sigma\Delta V_n$  of anionic polyynes complexes at the M06L/6-311++G(d,p) level.
- 13. Table S1** Average H-H bond distance (Å) of  $(HC_n)^-(H_2)_m$  and  $(C_n)^{2-}(H_2)_m$  complexes at M06L/6-311++G(d,p) level.
- 14. Table S2** Average C...H bond distance (Å) of  $(HC_n)^-(H_2)_m$  and  $(C_n)^{2-}(H_2)_m$  complexes at M06L/6-311++G(d,p) level.

15. **Table S3** BSSE-corrected  $E_{\text{int}}$  (kcal/mol) of  $(\text{HC}_n)^-(\text{H}_2)_m$  and  $(\text{C}_n)^{2-}(\text{H}_2)_m$  complexes at M06L/6-311++G(d,p) level.
16. **Table S4** BSSE-corrected  $E_{\text{int}/\text{H}_2}$  (kcal/mol) of  $(\text{HC}_n)^-(\text{H}_2)_m$  and  $(\text{C}_n)^{2-}(\text{H}_2)_m$  complexes at M06L/6-311++G(d,p) level.
17. **Table S5** Free energy change per  $\text{H}_2$  (kcal/mol) of  $(\text{HC}_n)^-(\text{H}_2)_m$  and  $(\text{C}_n)^{2-}(\text{H}_2)_m$  complexes at M06L/6-311++G(d,p) level.
18. **Table S6** Deprotonation energies (kcal/mol) of polyynes at M06L/6-311++G(d,p) level.
19. **Table S7** Average  $\rho_{\text{bcp}}$  values (a. u.) of  $(\text{HC}_n)^-(\text{H}_2)_m$  and  $(\text{C}_n)^{2-}(\text{H}_2)_m$  complexes at M06L/6-311++G(d,p) level.
20. **Table S8**  $V_{\text{min}}$  values (kcal/mol) of  $(\text{HC}_n)^-(\text{H}_2)_m$  and  $(\text{C}_n)^{2-}(\text{H}_2)_m$  complexes at M06L/6-311++G(d,p) level.
21. **Table S9**  $\Sigma\Delta V_n$  values (kcal/mol) of  $(\text{HC}_n)^-(\text{H}_2)_m$  and  $(\text{C}_n)^{2-}(\text{H}_2)_m$  complexes at M06L/6-311++G(d,p) level.
22. **Table S10**  $\text{H}_2$  affinity of anionic carbon chains.
23. Cartesian coordinates in Å unit of optimized geometry of  $(\text{H}_2\text{C}_n)(\text{H}_2)$  complexes at M06L/6-311++G(d,p) level.
24. Cartesian coordinates in Å unit of optimized geometry of  $(\text{H}_2\text{C}_n)(\text{H}_2)$  complexes at CCSD/aug-cc-pVDZ level.
25. Cartesian coordinates in Å unit of optimized geometry of  $(\text{HC}_n)^-(\text{H}_2)_m$  and  $(\text{C}_n)^{2-}(\text{H}_2)_m$  complexes at M06L/6-311++G(d,p) level.
26. Cartesian coordinates in Å unit of optimized geometry of  $(\text{HC}_n)^-(\text{H}_2)_m$  and  $(\text{C}_n)^{2-}(\text{H}_2)_m$  complexes at CCSD/aug-cc-pVDZ level.

- Fig. S1** Optimized geometries of  $H_2$  complexes of  $(C_2)_nH_2$ ,  $n = 1 - 3$  at M06L/6-311++G(d,p) level.

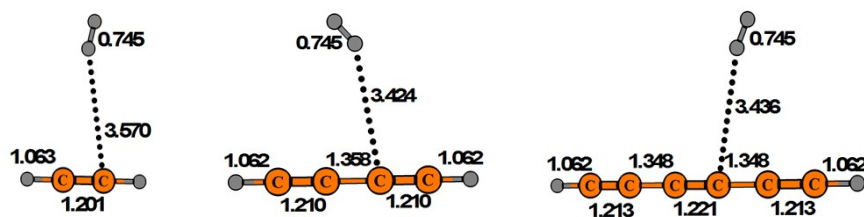

- Fig. S2** Optimized geometries of  $(HC_4)^-(H_2)_m$  complexes at M06L/6-311++G(d,p) level.

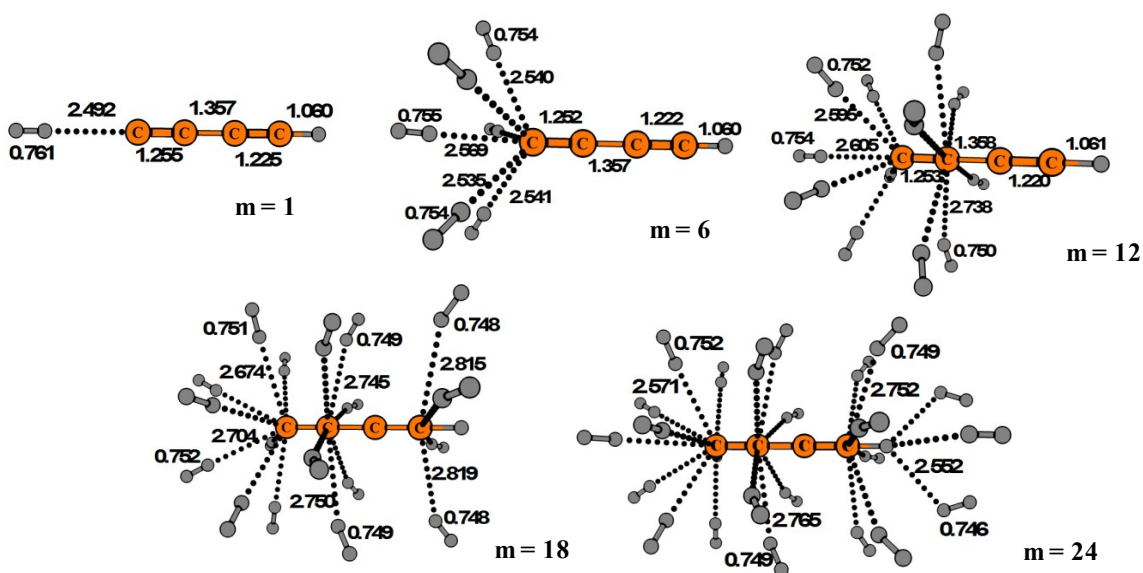

- Fig. S3** Optimized geometries of  $(HC_6)^-(H_2)_m$  complexes at M06L/6-311++G(d,p) level.

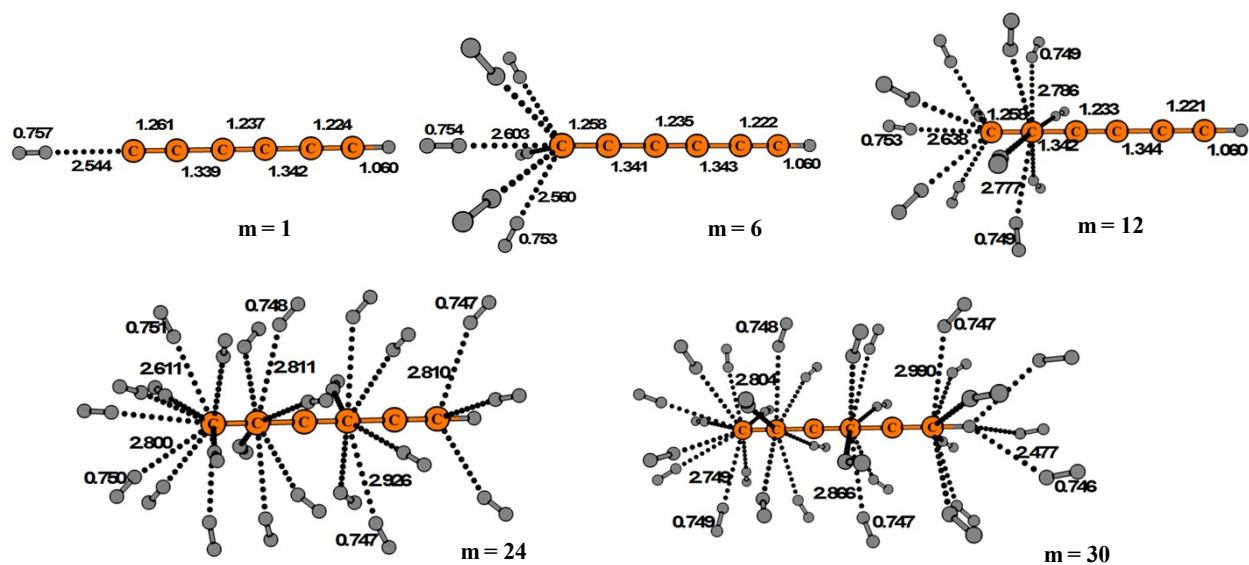

4. Fig. S4 Optimized geometries of  $(C_2)^{2-}(H_2)_m$  complexes at M06L/6-311++G(d,p) level.

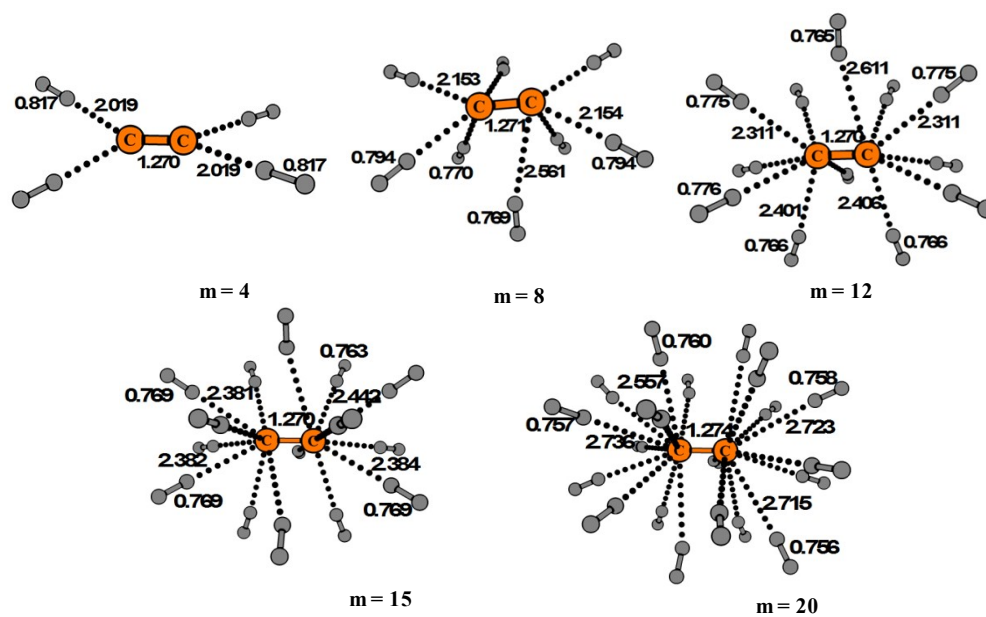

5. Fig. S5 Optimized geometries of  $(C_4)^{2-}(H_2)_m$  complexes at M06L/6-311++G(d,p) level.

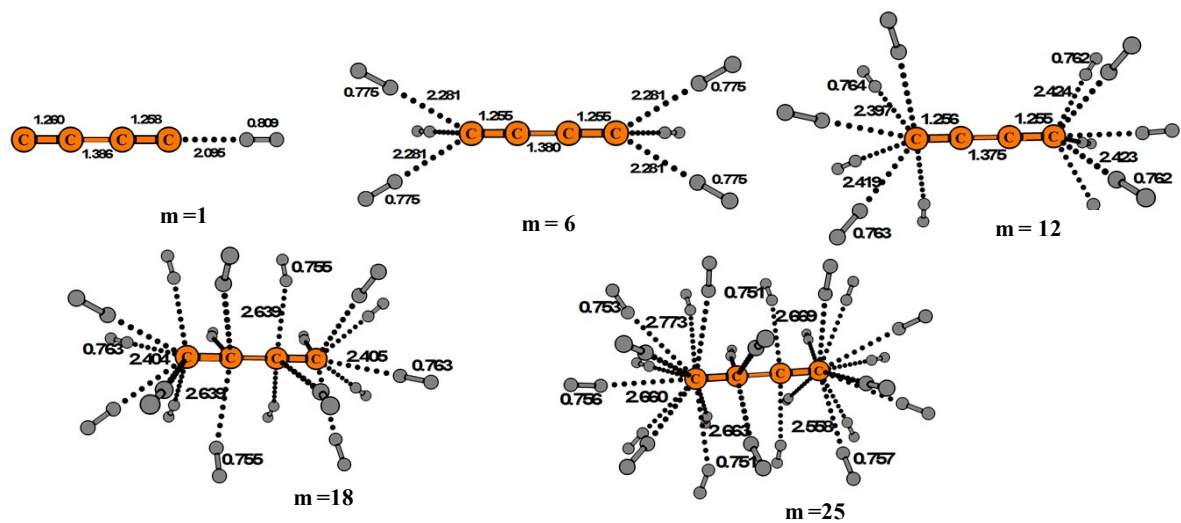

6. Fig. S6 Optimized geometries of  $(C_6)^{2-}(H_2)_m$  complexes at M06L/6-311++G(d,p) level.

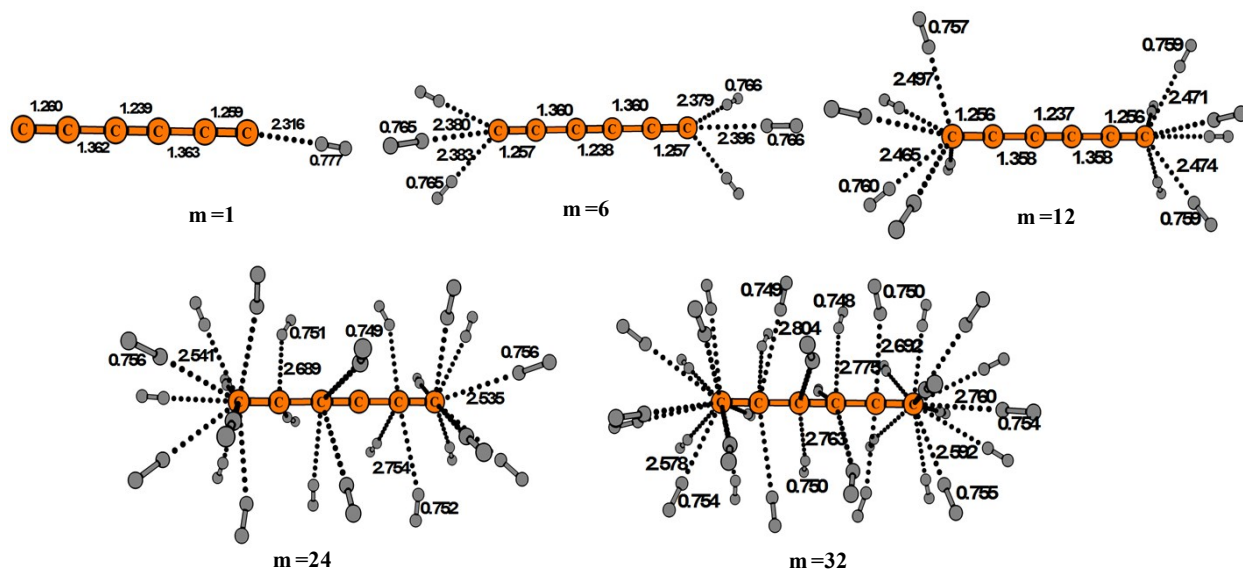

7. Fig. S7 Deprotonation energy versus number of carbons.

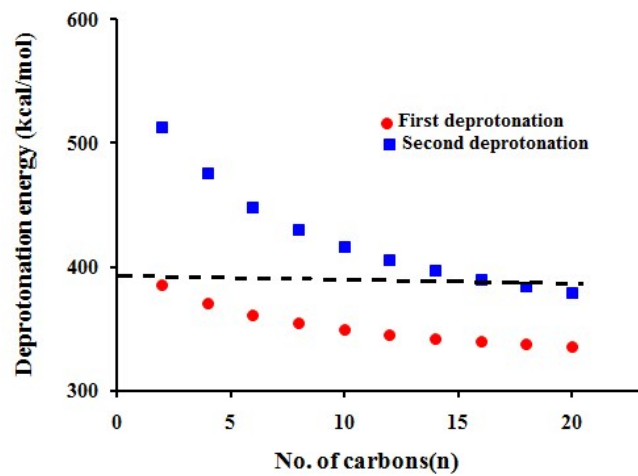

8. Fig. S8 QTAIM features of  $(\text{HC}_n)^-(\text{H}_2)_{\text{mmax}}$  and  $(\text{C}_n)^{2-}(\text{H}_2)_{\text{mmax}}$  complexes at M06L/6311++G(d,p) level.

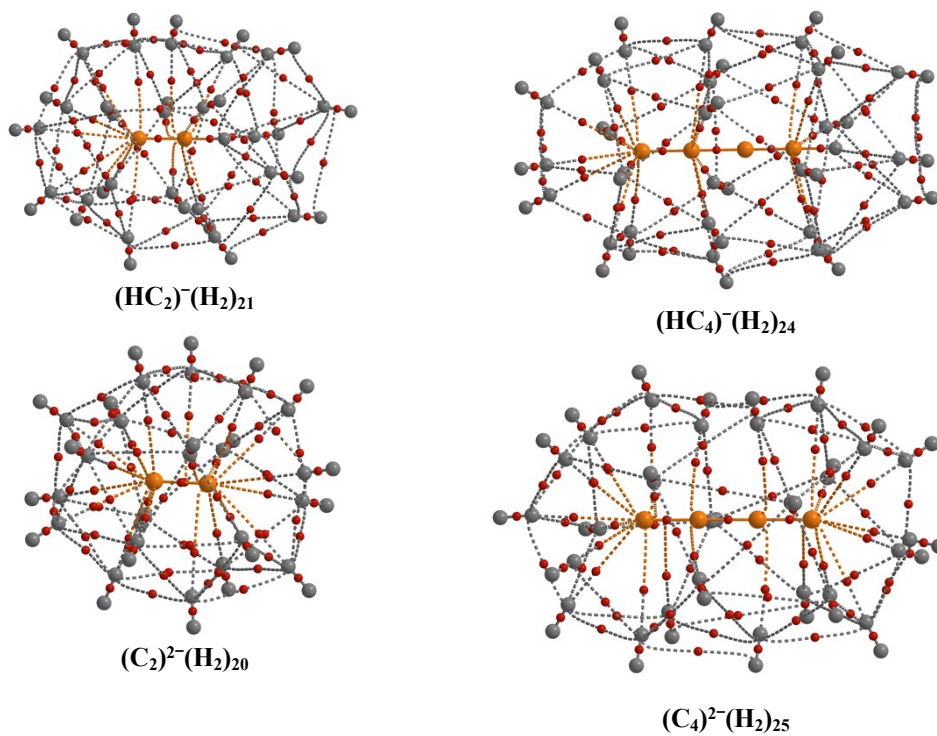

9. **Fig. S9** QTAIM features of  $(\text{HC}_n)^-(\text{H}_2)_{\text{mmax}+1}$  and  $(\text{C}_n)^{2-}(\text{H}_2)_{\text{mmax}+1}$  complexes at M06L/6311++G(d,p) level.

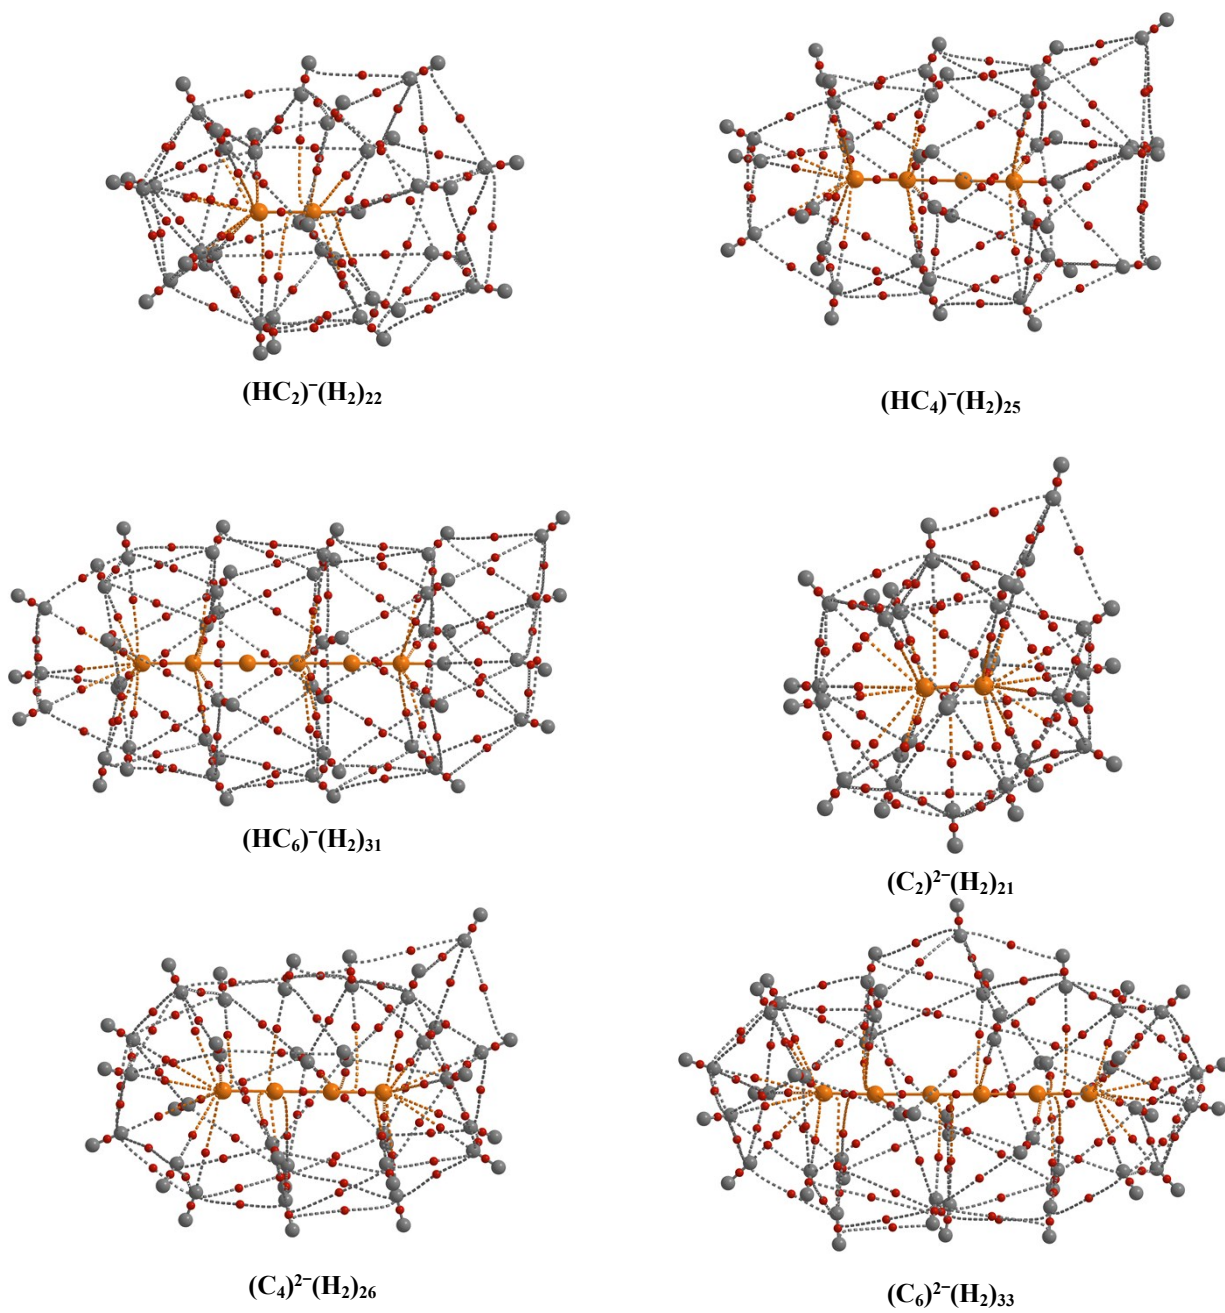

10. **Fig. S10** Correlation between  $E_{\text{int}}$  and  $\Sigma\rho_{\text{bcp}}$  of anionic polyyne complexes at the M06L/6-311++G(d,p) level.

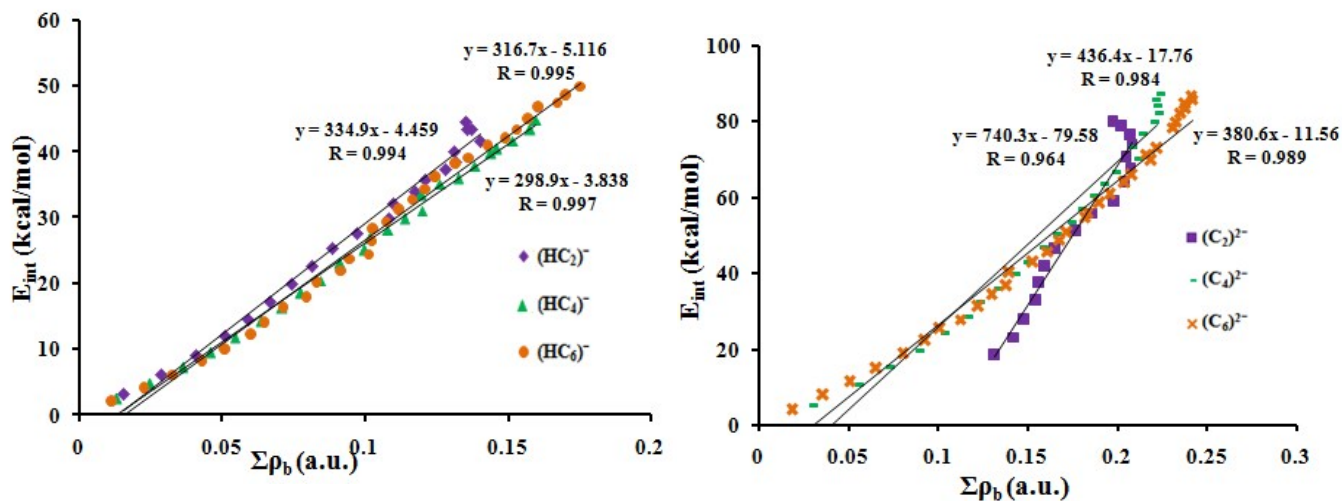

11. **Fig. S11** Correlation between  $\Sigma\Delta V_n$  and No. of  $\text{H}_2$  molecules of anionic polyyne complexes at the M06L/6-311++G(d,p) level.

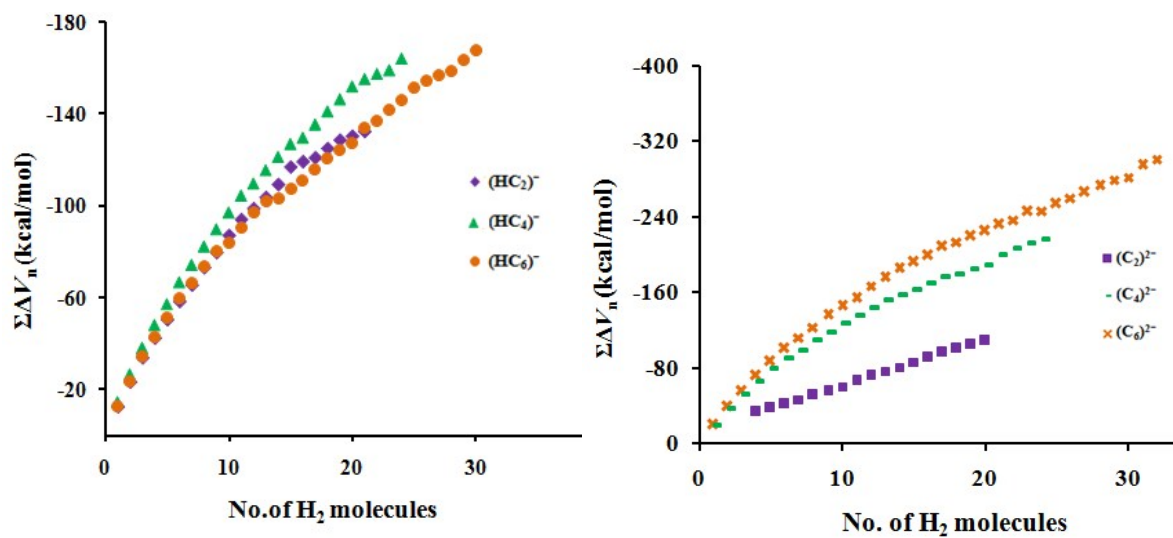



**12. Fig. S12** Correlation between  $E_{\text{int}}$  and  $\Sigma\Delta V_n$  of anionic polyynes complexes at the M06L/6-311++G(d,p) level.

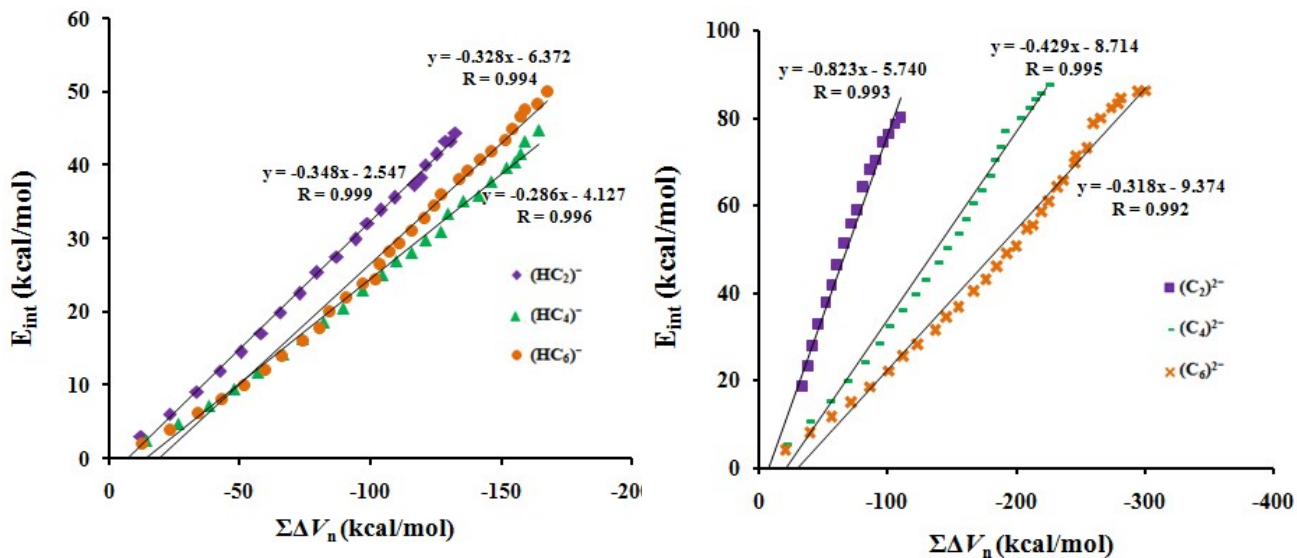

**13. Table S1** Average H-H bond distance ( $\text{\AA}$ ) of  $(\text{HC}_n)^-(\text{H}_2)_m$  and  $(\text{C}_n)^{2-}(\text{H}_2)_m$  complexes at M06L/6-311++G(d,p) level.

| m  | $(\text{HC}_n)^-(\text{H}_2)_m$ |                   |                   | $(\text{C}_n)^{2-}(\text{H}_2)_m$ |                     |                     |
|----|---------------------------------|-------------------|-------------------|-----------------------------------|---------------------|---------------------|
|    | $(\text{HC}_2)^-$               | $(\text{HC}_4)^-$ | $(\text{HC}_6)^-$ | $(\text{C}_2)^{2-}$               | $(\text{C}_4)^{2-}$ | $(\text{C}_6)^{2-}$ |
| 1  | 0.767                           | 0.761             | 0.757             | -                                 | 0.809               | 0.777               |
| 2  | 0.763                           | 0.758             | 0.756             | -                                 | 0.804               | 0.776               |
| 3  | 0.761                           | 0.757             | 0.755             | -                                 | 0.791               | 0.771               |
| 4  | 0.759                           | 0.756             | 0.754             | 0.817                             | 0.784               | 0.769               |
| 5  | 0.758                           | 0.755             | 0.753             | 0.804                             | 0.779               | 0.767               |
| 6  | 0.756                           | 0.754             | 0.753             | 0.794                             | 0.775               | 0.765               |
| 7  | 0.756                           | 0.753             | 0.752             | 0.788                             | 0.771               | 0.763               |
| 8  | 0.755                           | 0.753             | 0.752             | 0.782                             | 0.769               | 0.763               |
| 9  | 0.755                           | 0.752             | 0.751             | 0.777                             | 0.767               | 0.761               |
| 10 | 0.754                           | 0.752             | 0.751             | 0.774                             | 0.765               | 0.760               |
| 11 | 0.754                           | 0.752             | 0.751             | 0.772                             | 0.764               | 0.759               |
| 12 | 0.753                           | 0.751             | 0.751             | 0.770                             | 0.763               | 0.759               |
| 13 | 0.753                           | 0.751             | 0.750             | 0.769                             | 0.762               | 0.758               |
| 14 | 0.752                           | 0.751             | 0.750             | 0.767                             | 0.761               | 0.757               |
| 15 | 0.752                           | 0.751             | 0.750             | 0.765                             | 0.760               | 0.757               |

|    |       |       |       |       |       |       |
|----|-------|-------|-------|-------|-------|-------|
| 16 | 0.752 | 0.750 | 0.750 | 0.764 | 0.759 | 0.756 |
| 17 | 0.751 | 0.750 | 0.749 | 0.763 | 0.759 | 0.756 |
| 18 | 0.751 | 0.750 | 0.749 | 0.761 | 0.759 | 0.755 |
| 19 | 0.751 | 0.750 | 0.749 | 0.760 | 0.757 | 0.755 |
| 20 | 0.751 | 0.750 | 0.749 | 0.759 | 0.757 | 0.754 |
| 21 | 0.750 | 0.750 | 0.749 | -     | 0.756 | 0.754 |
| 22 | -     | 0.750 | 0.749 | -     | 0.756 | 0.754 |
| 23 | -     | 0.750 | 0.749 | -     | 0.757 | 0.754 |
| 24 | -     | 0.749 | 0.749 | -     | 0.755 | 0.753 |
| 25 | -     | -     | 0.749 | -     | 0.754 | 0.753 |
| 26 | -     | -     | 0.749 | -     | -     | 0.753 |
| 27 | -     | -     | 0.748 | -     | -     | 0.752 |
| 28 | -     | -     | 0.748 | -     | -     | 0.752 |
| 29 | -     | -     | 0.748 | -     | -     | 0.752 |
| 30 | -     | -     | 0.748 | -     | -     | 0.752 |
| 31 | -     | -     | -     | -     | -     | 0.752 |
| 32 | -     | -     | -     | -     | -     | 0.752 |

**14. Table S2** Average C...H bond distance (Å) of  $(\text{HC}_n)^-(\text{H}_2)_m$  and  $(\text{C}_n)^{2-}(\text{H}_2)_m$  complexes at M06L/6-311++G(d,p) level.

| m  | $(\text{HC}_n)^-(\text{H}_2)_m$ |                   |                   | $(\text{C}_n)^{2-}(\text{H}_2)_m$ |                     |                     |
|----|---------------------------------|-------------------|-------------------|-----------------------------------|---------------------|---------------------|
|    | $(\text{HC}_2)^-$               | $(\text{HC}_4)^-$ | $(\text{HC}_6)^-$ | $(\text{C}_2)^{2-}$               | $(\text{C}_4)^{2-}$ | $(\text{C}_6)^{2-}$ |
| 1  | 2.445                           | 2.492             | 2.544             | -                                 | 2.095               | 2.316               |
| 2  | 2.428                           | 2.499             | 2.547             | -                                 | 2.125               | 2.332               |
| 3  | 2.449                           | 2.510             | 2.550             | -                                 | 2.181               | 2.350               |
| 4  | 2.469                           | 2.524             | 2.554             | 2.019                             | 2.219               | 2.358               |
| 5  | 2.506                           | 2.534             | 2.562             | 2.089                             | 2.252               | 2.369               |
| 6  | 2.534                           | 2.544             | 2.568             | 2.153                             | 2.281               | 2.386               |
| 7  | 2.557                           | 2.589             | 2.602             | 2.227                             | 2.323               | 2.415               |
| 8  | 2.570                           | 2.597             | 2.626             | 2.301                             | 2.347               | 2.420               |
| 9  | 2.599                           | 2.612             | 2.653             | 2.318                             | 2.368               | 2.436               |
| 10 | 2.601                           | 2.628             | 2.657             | 2.356                             | 2.395               | 2.458               |
| 11 | 2.606                           | 2.624             | 2.697             | 2.382                             | 2.412               | 2.465               |
| 12 | 2.655                           | 2.665             | 2.667             | 2.399                             | 2.431               | 2.480               |
| 13 | 2.627                           | 2.691             | 2.711             | 2.404                             | 2.446               | 2.507               |
| 14 | 2.649                           | 2.717             | 2.725             | 2.436                             | 2.472               | 2.521               |
| 15 | 2.651                           | 2.696             | 2.736             | 2.455                             | 2.484               | 2.534               |
| 16 | 2.644                           | 2.711             | 2.752             | 2.504                             | 2.509               | 2.554               |

|    |       |       |       |       |       |       |
|----|-------|-------|-------|-------|-------|-------|
| 17 | 2.659 | 2.712 | 2.768 | 2.533 | 2.524 | 2.564 |
| 18 | 2.622 | 2.719 | 2.769 | 2.539 | 2.551 | 2.589 |
| 19 | 2.666 | 2.726 | 2.772 | 2.605 | 2.557 | 2.603 |
| 20 | 2.775 | 2.731 | 2.774 | 2.650 | 2.579 | 2.614 |
| 21 | 2.755 | 2.742 | 2.777 | -     | 2.598 | 2.607 |
| 22 | -     | 2.722 | 2.778 | -     | 2.620 | 2.628 |
| 23 | -     | 2.701 | 2.775 | -     | 2.614 | 2.618 |
| 24 | -     | 2.714 | 2.773 | -     | 2.656 | 2.648 |
| 25 | -     | -     | 2.783 | -     | 2.673 | 2.654 |
| 26 | -     | -     | 2.784 | -     | -     | 2.655 |
| 27 | -     | -     | 2.829 | -     | -     | 2.681 |
| 28 | -     | -     | 2.807 | -     | -     | 2.679 |
| 29 | -     | -     | 2.799 | -     | -     | 2.689 |
| 30 | -     | -     | 2.784 | -     | -     | 2.713 |
| 31 | -     | -     | -     | -     | -     | 2.730 |
| 32 | -     | -     | -     | -     | -     | 2.753 |

**15. Table S3** BSSE-corrected  $E_{\text{int}}$  (kcal/mol) of  $(\text{HC}_n)^-(\text{H}_2)_m$  and  $(\text{C}_n)^{2-}(\text{H}_2)_m$  complexes at M06L/6-311++G(d,p) level.

| m  | $(\text{HC}_n)^-(\text{H}_2)_m$ |                   |                   | $(\text{C}_n)^{2-}(\text{H}_2)_m$ |                     |                     |
|----|---------------------------------|-------------------|-------------------|-----------------------------------|---------------------|---------------------|
|    | $(\text{HC}_2)^-$               | $(\text{HC}_4)^-$ | $(\text{HC}_6)^-$ | $(\text{C}_2)^{2-}$               | $(\text{C}_4)^{2-}$ | $(\text{C}_6)^{2-}$ |
| 1  | 3.1                             | 2.4               | 2.0               | -                                 | 5.3                 | 4.0                 |
| 2  | 6.0                             | 4.7               | 4.0               | -                                 | 10.6                | 8.0                 |
| 3  | 9.1                             | 7.2               | 6.2               | -                                 | 15.3                | 11.5                |
| 4  | 11.9                            | 9.5               | 8.1               | 18.5                              | 19.8                | 15.0                |
| 5  | 14.5                            | 11.7              | 9.9               | 23.2                              | 24.1                | 18.7                |
| 6  | 17.1                            | 14.2              | 12.2              | 27.8                              | 28.5                | 22.2                |
| 7  | 19.9                            | 16.3              | 14.0              | 32.7                              | 32.4                | 25.5                |
| 8  | 22.5                            | 18.5              | 16.2              | 37.6                              | 36.2                | 28.0                |
| 9  | 25.3                            | 20.4              | 17.9              | 41.7                              | 39.8                | 31.3                |
| 10 | 27.5                            | 23.0              | 20.1              | 46.3                              | 43.0                | 34.3                |
| 11 | 29.9                            | 25.1              | 22.0              | 51.1                              | 46.9                | 36.7                |
| 12 | 32.1                            | 26.9              | 23.8              | 56.0                              | 50.2                | 40.3                |
| 13 | 33.9                            | 28.1              | 24.5              | 58.8                              | 53.6                | 43.0                |
| 14 | 35.6                            | 29.7              | 26.5              | 63.9                              | 56.8                | 45.8                |
| 15 | 37.3                            | 31.0              | 28.2              | 68.0                              | 60.4                | 48.9                |
| 16 | 38.4                            | 33.4              | 29.4              | 70.4                              | 63.5                | 50.6                |
| 17 | 40.1                            | 35.1              | 31.1              | 74.2                              | 66.7                | 54.5                |
| 18 | 41.5                            | 35.8              | 32.8              | 76.3                              | 70.3                | 55.6                |
| 19 | 43.3                            | 37.8              | 34.4              | 78.7                              | 73.4                | 58.5                |
| 20 | 43.3                            | 39.7              | 36.1              | 79.8                              | 76.8                | 60.8                |

|    |      |      |      |   |      |      |
|----|------|------|------|---|------|------|
| 21 | 44.5 | 40.5 | 38.2 | - | 79.8 | 63.9 |
| 22 | -    | 41.6 | 39.2 | - | 82.1 | 65.9 |
| 23 | -    | 43.3 | 40.8 | - | 84.1 | 69.7 |
| 24 | -    | 44.8 | 42.0 | - | 85.6 | 71.4 |
| 25 | -    | -    | 43.4 | - | 87.4 | 72.9 |
| 26 | -    | -    | 44.9 | - | -    | 78.5 |
| 27 | -    | -    | 46.7 | - | -    | 80.0 |
| 28 | -    | -    | 47.5 | - | -    | 82.3 |
| 29 | -    | -    | 48.5 | - | -    | 83.3 |
| 30 | -    | -    | 50.0 | - | -    | 84.6 |
| 31 | -    | -    | -    | - | -    | 85.8 |
| 32 | -    | -    | -    | - | -    | 86.3 |

**16. Table S4** BSSE-corrected  $E_{\text{int}/\text{H}_2}$  (kcal/mol) of  $(\text{HC}_n)^-(\text{H}_2)_m$  and  $(\text{C}_n)^{2-}(\text{H}_2)_m$  complexes at M06L/6-311++G(d,p) level.

| m  | $(\text{HC}_n)^-(\text{H}_2)_m$ |                   |                   | $(\text{C}_n)^{2-}(\text{H}_2)_m$ |                     |                     |
|----|---------------------------------|-------------------|-------------------|-----------------------------------|---------------------|---------------------|
|    | $(\text{HC}_2)^-$               | $(\text{HC}_4)^-$ | $(\text{HC}_6)^-$ | $(\text{C}_2)^{2-}$               | $(\text{C}_4)^{2-}$ | $(\text{C}_6)^{2-}$ |
| 1  | 3.1                             | 2.4               | 2.0               | -                                 | 5.3                 | 4.0                 |
| 2  | 3.0                             | 2.4               | 2.0               | -                                 | 5.3                 | 4.0                 |
| 3  | 3.0                             | 2.4               | 2.1               | -                                 | 5.1                 | 3.8                 |
| 4  | 3.0                             | 2.4               | 2.0               | 4.6                               | 5.0                 | 3.7                 |
| 5  | 2.9                             | 2.3               | 2.0               | 4.6                               | 4.8                 | 3.7                 |
| 6  | 2.9                             | 2.4               | 2.0               | 4.6                               | 4.7                 | 3.7                 |
| 7  | 2.8                             | 2.3               | 2.0               | 4.7                               | 4.6                 | 3.6                 |
| 8  | 2.8                             | 2.3               | 2.0               | 4.7                               | 4.5                 | 3.5                 |
| 9  | 2.8                             | 2.3               | 2.0               | 4.6                               | 4.4                 | 3.5                 |
| 10 | 2.8                             | 2.3               | 2.0               | 4.6                               | 4.3                 | 3.4                 |
| 11 | 2.7                             | 2.3               | 2.0               | 4.6                               | 4.3                 | 3.3                 |
| 12 | 2.7                             | 2.2               | 2.0               | 4.7                               | 4.2                 | 3.4                 |
| 13 | 2.6                             | 2.2               | 1.9               | 4.5                               | 4.1                 | 3.3                 |
| 14 | 2.5                             | 2.1               | 1.9               | 4.6                               | 4.1                 | 3.3                 |
| 15 | 2.5                             | 2.1               | 1.9               | 4.5                               | 4.0                 | 3.3                 |
| 16 | 2.4                             | 2.1               | 1.8               | 4.4                               | 4.0                 | 3.2                 |
| 17 | 2.4                             | 2.1               | 1.8               | 4.4                               | 3.9                 | 3.2                 |
| 18 | 2.3                             | 2.0               | 1.8               | 4.2                               | 3.9                 | 3.1                 |
| 19 | 2.3                             | 2.0               | 1.8               | 4.1                               | 3.9                 | 3.1                 |
| 20 | 2.2                             | 2.0               | 1.8               | 4.0                               | 3.8                 | 3.0                 |

|    |     |     |     |   |     |     |
|----|-----|-----|-----|---|-----|-----|
| 21 | 2.1 | 1.9 | 1.8 | - | 3.8 | 3.0 |
| 22 | -   | 1.9 | 1.8 | - | 3.7 | 3.0 |
| 23 | -   | 1.9 | 1.8 | - | 3.7 | 3.0 |
| 24 | -   | 1.9 | 1.8 | - | 3.6 | 3.0 |
| 25 | -   | -   | 1.7 | - | 3.5 | 2.9 |
| 26 | -   | -   | 1.7 | - | -   | 3.0 |
| 27 | -   | -   | 1.7 | - | -   | 3.0 |
| 28 | -   | -   | 1.7 | - | -   | 2.9 |
| 29 | -   | -   | 1.7 | - | -   | 2.9 |
| 30 | -   | -   | 1.7 | - | -   | 2.8 |
| 31 | -   | -   | -   | - | -   | 2.8 |
| 32 | -   | -   | -   | - | -   | 2.7 |

**17. Table S5** Free energy change per H<sub>2</sub> (kcal/mol) of (HC<sub>n</sub>)<sup>-</sup>(H<sub>2</sub>)<sub>m</sub> and (C<sub>n</sub>)<sup>2-</sup>(H<sub>2</sub>)<sub>m</sub> complexes at M06L/6-311++G(d,p) level.

| m  | (HC <sub>n</sub> ) <sup>-</sup> (H <sub>2</sub> ) <sub>m</sub> |                                 |                                 | (C <sub>n</sub> ) <sup>2-</sup> (H <sub>2</sub> ) <sub>m</sub> |                                 |                                 |
|----|----------------------------------------------------------------|---------------------------------|---------------------------------|----------------------------------------------------------------|---------------------------------|---------------------------------|
|    | (HC <sub>2</sub> ) <sup>-</sup>                                | (HC <sub>4</sub> ) <sup>-</sup> | (HC <sub>6</sub> ) <sup>-</sup> | (C <sub>2</sub> ) <sup>2-</sup>                                | (C <sub>4</sub> ) <sup>2-</sup> | (C <sub>6</sub> ) <sup>2-</sup> |
| 1  | 6.3                                                            | 5.1                             | 4.9                             | -                                                              | 4.9                             | 3.5                             |
| 2  | 3.8                                                            | 2.5                             | 4.6                             | -                                                              | 1.4                             | 4.1                             |
| 3  | 4.2                                                            | 3.6                             | 4.9                             | -                                                              | 2.1                             | 3.8                             |
| 4  | 4.2                                                            | 3.8                             | 4.3                             | 0.6                                                            | 2.5                             | 3.8                             |
| 5  | 4.8                                                            | 4.1                             | 4.4                             | 0.4                                                            | 1.7                             | 3.8                             |
| 6  | 5.0                                                            | 4.3                             | 4.4                             | 1.2                                                            | 1.9                             | 4.1                             |
| 7  | 5.1                                                            | 5.4                             | 5.6                             | 1.2                                                            | 3.0                             | 4.5                             |
| 8  | 4.1                                                            | 4.4                             | 5.5                             | 1.4                                                            | 3.4                             | 4.1                             |
| 9  | 5.1                                                            | 4.5                             | 4.7                             | 1.5                                                            | 3.5                             | 3.6                             |
| 10 | 4.2                                                            | 4.5                             | 5.9                             | 1.6                                                            | 3.6                             | 4.7                             |
| 11 | 4.5                                                            | 4.6                             | 6.1                             | 1.8                                                            | 3.8                             | 4.6                             |
| 12 | 5.5                                                            | 4.6                             | 6.2                             | 1.8                                                            | 4.0                             | 3.7                             |
| 13 | 5.6                                                            | 4.6                             | 4.8                             | 1.9                                                            | 4.0                             | 4.9                             |
| 14 | 5.8                                                            | 4.6                             | 6.3                             | 2.6                                                            | 4.1                             | 3.8                             |
| 15 | 4.4                                                            | 4.7                             | 6.3                             | 2.1                                                            | 4.2                             | 5.0                             |
| 16 | 4.7                                                            | 4.7                             | 6.5                             | 2.2                                                            | 4.3                             | 4.9                             |
| 17 | 5.9                                                            | 4.9                             | 6.3                             | 2.5                                                            | 3.4                             | 5.0                             |
| 18 | 4.9                                                            | 4.8                             | 6.4                             | 2.6                                                            | 3.5                             | 5.1                             |
| 19 | 6.3                                                            | 4.9                             | 6.5                             | 3.8                                                            | 3.4                             | 5.2                             |
| 20 | 6.5                                                            | 4.9                             | 6.6                             | 3.9                                                            | 4.7                             | 5.3                             |
| 21 | 6.6                                                            | 5.0                             | 6.6                             | -                                                              | 3.7                             | 5.4                             |
| 22 | -                                                              | 5.0                             | 6.5                             | -                                                              | 3.7                             | 5.3                             |

|    |   |     |     |   |     |     |
|----|---|-----|-----|---|-----|-----|
| 23 | - | 5.1 | 6.7 | - | 3.8 | 4.3 |
| 24 | - | 5.0 | 6.7 | - | 4.9 | 5.6 |
| 25 | - | -   | 6.7 | - | 5.2 | 4.4 |
| 26 | - | -   | 6.7 | - | -   | 5.7 |
| 27 | - | -   | 6.7 | - | -   | 5.7 |
| 28 | - | -   | 6.7 | - | -   | 5.9 |
| 29 | - | -   | 6.7 | - | -   | 5.8 |
| 30 | - | -   | 6.8 | - | -   | 5.9 |
| 31 | - | -   | -   | - | -   | 4.5 |
| 32 | - | -   | -   | - | -   | 4.7 |

**18. Table S6** Deprotonation energies (kcal/mol) of polyynes at M06L/6-311++G(d,p) level.

| n  | first deprotonation energy | second deprotonation energy |
|----|----------------------------|-----------------------------|
| 2  | 385.9                      | 513.1                       |
| 4  | 370.6                      | 475.2                       |
| 6  | 360.9                      | 448.1                       |
| 8  | 354.2                      | 429.4                       |
| 10 | 349.2                      | 415.7                       |
| 12 | 345.4                      | 405.1                       |
| 14 | 342.4                      | 396.7                       |
| 16 | 339.9                      | 389.8                       |
| 18 | 337.8                      | 384.0                       |
| 20 | 336.0                      | 379.1                       |

**19. Table S7** Average  $\rho_{\text{bcp}}$  values (a. u.) of  $(\text{HC}_n)^-(\text{H}_2)_m$  and  $(\text{C}_n)^{2-}(\text{H}_2)_m$  complexes at M06L/6-311++G(d,p) level.

| m  | $(\text{HC}_2)^-$ | $(\text{HC}_4)^-$ | $(\text{HC}_6)^-$ | $(\text{C}_2)^{2-}$ | $(\text{C}_4)^{2-}$ | $(\text{C}_6)^{2-}$ |
|----|-------------------|-------------------|-------------------|---------------------|---------------------|---------------------|
| 1  | 0.0155            | 0.0130            | 0.0116            | -                   | 0.0290              | 0.0185              |
| 2  | 0.0144            | 0.0125            | 0.0113            | -                   | 0.0272              | 0.0180              |
| 3  | 0.0137            | 0.0121            | 0.0110            | -                   | 0.0239              | 0.0169              |
| 4  | 0.0128            | 0.0115            | 0.0107            | 0.0329              | 0.0219              | 0.0164              |
| 5  | 0.0118            | 0.0109            | 0.0102            | 0.0284              | 0.0203              | 0.0160              |
| 6  | 0.0111            | 0.0106            | 0.0101            | 0.0247              | 0.0191              | 0.0155              |
| 7  | 0.0106            | 0.0101            | 0.0092            | 0.0221              | 0.0174              | 0.0144              |
| 8  | 0.0102            | 0.0097            | 0.0089            | 0.0195              | 0.0165              | 0.0140              |
| 9  | 0.0099            | 0.0094            | 0.0088            | 0.0177              | 0.0157              | 0.0136              |
| 10 | 0.0097            | 0.0091            | 0.0083            | 0.0166              | 0.0148              | 0.0130              |
| 11 | 0.0098            | 0.0091            | 0.0083            | 0.0161              | 0.0143              | 0.0126              |

|    |        |        |        |        |        |        |
|----|--------|--------|--------|--------|--------|--------|
| 12 | 0.0092 | 0.0085 | 0.0079 | 0.0155 | 0.0137 | 0.0116 |
| 13 | 0.0090 | 0.0083 | 0.0078 | 0.0153 | 0.0133 | 0.0118 |
| 14 | 0.0086 | 0.0081 | 0.0073 | 0.0146 | 0.0127 | 0.0115 |
| 15 | 0.0085 | 0.0080 | 0.0069 | 0.0138 | 0.0123 | 0.0112 |
| 16 | 0.0082 | 0.0075 | 0.0067 | 0.0128 | 0.0119 | 0.0108 |
| 17 | 0.0077 | 0.0074 | 0.0066 | 0.0122 | 0.0116 | 0.0107 |
| 18 | 0.0078 | 0.0074 | 0.0065 | 0.0115 | 0.0116 | 0.0102 |
| 19 | 0.0071 | 0.0073 | 0.0064 | 0.0107 | 0.0109 | 0.0100 |
| 20 | 0.0069 | 0.0072 | 0.0062 | 0.0099 | 0.0106 | 0.0098 |
| 21 | 0.0064 | 0.0070 | 0.0063 | -      | 0.0104 | 0.0097 |
| 22 | -      | 0.0069 | 0.0062 | -      | 0.0101 | 0.0095 |
| 23 | -      | 0.0069 | 0.0062 | -      | 0.0096 | 0.0095 |
| 24 | -      | 0.0067 | 0.0062 | -      | 0.0092 | 0.0090 |
| 25 | -      | -      | 0.0061 | -      | -      | 0.0089 |
| 26 | -      | -      | 0.0061 | -      | -      | 0.0089 |
| 27 | -      | -      | 0.0060 | -      | -      | 0.0086 |
| 28 | -      | -      | 0.0060 | -      | -      | 0.0084 |
| 29 | -      | -      | 0.0059 | -      | -      | 0.0082 |
| 30 | -      | -      | 0.0059 | -      | -      | 0.0079 |
| 31 | -      | -      | -      | -      | -      | 0.0078 |
| 32 | -      | -      | -      | -      | -      | 0.0075 |

**20. Table S8**  $V_{\min}$  values (kcal/mol) of  $(\text{HC}_n)^-(\text{H}_2)_m$  and  $(\text{C}_n)^{2-}(\text{H}_2)_m$  complexes at M06L/6-311++G(d,p) level.

| m  | $(\text{HC}_2)^-$ | $(\text{HC}_4)^-$ | $(\text{HC}_6)^-$ | $(\text{C}_2)^{2-}$ | $(\text{C}_4)^{2-}$ | $(\text{C}_6)^{2-}$ |
|----|-------------------|-------------------|-------------------|---------------------|---------------------|---------------------|
| 1  | -75.0             | -50.7             | -39.6             | -                   | -140.9              | -113.5              |
| 2  | -73.9             | -50.0             | -39.2             | -                   | -133.8              | -110.1              |
| 3  | -72.2             | -48.6             | -38.2             | -                   | -129.9              | -109.5              |
| 4  | -70.8             | -48.1             | -37.9             | -146.7              | -127.9              | -105.7              |
| 5  | -67.9             | -47.4             | -37.6             | -146.2              | -125.8              | -106.1              |
| 6  | -66.9             | -46.6             | -36.7             | -145.3              | -122.6              | -100.4              |
| 7  | -65.5             | -46.2             | -36.3             | -134.6              | -113.2              | -99.7               |
| 8  | -64.3             | -45.6             | -36.2             | -133.9              | -113.7              | -100.2              |
| 9  | -64.0             | -45.2             | -36.0             | -131.8              | -111.5              | -100.1              |
| 10 | -60.5             | -44.9             | -35.8             | -130.5              | -111.1              | -98.5               |
| 11 | -59.8             | -44.5             | -35.1             | -129.0              | -110.7              | -99.2               |
| 12 | -55.4             | -44.4             | -35.1             | -127.6              | -109.4              | -98.2               |
| 13 | -54.7             | -44.3             | -35.1             | -125.0              | -109.2              | -97.3               |

|    |       |       |       |        |        |        |
|----|-------|-------|-------|--------|--------|--------|
| 14 | -54.2 | -44.2 | -35.0 | -123.1 | -108.3 | -96.5  |
| 15 | -55.0 | -44.6 | -35.0 | -122.7 | -107.4 | -96.3  |
| 16 | -45.8 | -44.6 | -35.1 | -122.2 | -107.0 | -96.3  |
| 17 | -44.9 | -44.7 | -34.6 | -121.5 | -106.8 | -96.0  |
| 18 | -44.7 | -45.0 | -34.8 | -117.9 | -108.3 | -96.3  |
| 19 | -43.7 | -44.4 | -34.8 | -117.2 | -107.1 | -96.3  |
| 20 | -40.3 | -44.9 | -34.8 | -116.9 | -105.4 | -97.2  |
| 21 | -40.2 | -37.1 | -34.6 | -      | -104.8 | -95.4  |
| 22 | -     | -36.7 | -35.5 | -      | -104.2 | -93.3  |
| 23 | -     | -36.6 | -35.7 | -      | -103.2 | -94.6  |
| 24 | -     | -36.4 | -36.1 | -      | -101.0 | -93.8  |
| 25 | -     | -     | -35.7 | -      | -      | -93.6  |
| 26 | -     | -     | -35.7 | -      | -      | -93.6  |
| 27 | -     | -     | -36.1 | -      | -      | -93.9  |
| 28 | -     | -     | -30.6 | -      | -      | -92.3  |
| 29 | -     | -     | -29.2 | -      | -      | -90.6  |
| 30 | -     | -     | -30.3 | -      | -      | -90.6  |
| 31 | -     | -     | -     | -      | -      | -91.5  |
| 32 | -     | -     | -     | -      | -      | -113.5 |

**21. Table S9**  $\Sigma\Delta V_n$  values (kcal/mol) of  $(HC_n)^-(H_2)_m$  and  $(C_n)^{2-}(H_2)_m$  complexes at M06L/6-311++G(d,p) level.

| m  | $(HC_2)^-$ | $(HC_4)^-$ | $(HC_6)^-$ | $(C_2)^{2-}$ | $(C_4)^{2-}$ | $(C_6)^{2-}$ |
|----|------------|------------|------------|--------------|--------------|--------------|
| 1  | -12.3      | -14.4      | -12.7      | -            | -19.3        | -20.1        |
| 2  | -23.1      | -26.5      | -23.4      | -            | -37.4        | -39.0        |
| 3  | -33.7      | -38.1      | -34.2      | -            | -52.6        | -55.8        |
| 4  | -42.3      | -48.0      | -43.2      | -34.4        | -66.9        | -72.2        |
| 5  | -50.4      | -57.1      | -51.4      | -38.2        | -79.5        | -87.0        |
| 6  | -58.3      | -66.6      | -59.9      | -41.8        | -91.2        | -101.4       |
| 7  | -65.5      | -74.2      | -66.2      | -46.7        | -99.5        | -112.8       |
| 8  | -73.1      | -82.2      | -73.9      | -51.6        | -109.5       | -123.7       |
| 9  | -79.7      | -89.8      | -80.5      | -55.8        | -118.6       | -136.7       |
| 10 | -87.2      | -97.1      | -84.2      | -60.7        | -127.3       | -145.9       |
| 11 | -94.2      | -104.4     | -90.7      | -66.8        | -136.7       | -154.7       |
| 12 | -98.9      | -109.7     | -97.1      | -72.4        | -144.1       | -167.6       |
| 13 | -103.8     | -115.6     | -101.8     | -76.9        | -152.5       | -175.9       |
| 14 | -109.4     | -121.3     | -103.5     | -81.1        | -158.2       | -185.5       |
| 15 | -117.1     | -127.0     | -107.5     | -86.8        | -163.7       | -193.0       |
| 16 | -119.4     | -129.7     | -111.0     | -91.2        | -170.5       | -199.5       |



|    |        |        |        |        |        |        |
|----|--------|--------|--------|--------|--------|--------|
| 17 | -121.1 | -135.5 | -115.8 | -96.5  | -177.6 | -209.0 |
| 18 | -125.2 | -141.2 | -120.6 | -101.1 | -180.5 | -213.8 |
| 19 | -128.8 | -146.5 | -124.4 | -105.4 | -185.3 | -220.3 |
| 20 | -130.6 | -152.1 | -127.2 | -109.7 | -188.9 | -225.6 |
| 21 | -132.6 | -155.3 | -133.8 | -      | -200.6 | -232.5 |
| 22 | -      | -157.6 | -137.1 | -      | -207.7 | -237.4 |
| 23 | -      | -159.2 | -141.7 | -      | -212.7 | -246.0 |
| 24 | -      | -164.2 | -146.4 | -      | -216.6 | -246.8 |
| 25 | -      | -      | -151.5 | -      | -      | -254.3 |
| 26 | -      | -      | -154.3 | -      | -      | -260.6 |
| 27 | -      | -      | -157.3 | -      | -      | -266.2 |
| 28 | -      | -      | -158.8 | -      | -      | -273.3 |
| 29 | -      | -      | -163.8 | -      | -      | -279.4 |
| 30 | -      | -      | -167.9 | -      | -      | -282.1 |
| 31 | -      | -      | -      | -      | -      | -295.1 |
| 32 | -      | -      | -      | -      | -      | -301.3 |

**21. Table S10** H<sub>2</sub> affinity of anionic carbon chains.

| Anion                        | Molecular weight | m <sub>max</sub> | Weight percent of H <sub>2</sub> (wt%) |
|------------------------------|------------------|------------------|----------------------------------------|
| HC <sub>2</sub> <sup>-</sup> | 25.029           | 21               | 62.8                                   |
| HC <sub>4</sub> <sup>-</sup> | 49.051           | 24               | 49.7                                   |
| HC <sub>6</sub> <sup>-</sup> | 73.072           | 30               | 45.3                                   |
| C <sub>2</sub> <sup>2-</sup> | 24.021           | 20               | 62.7                                   |
| C <sub>4</sub> <sup>2-</sup> | 49.051           | 25               | 50.7                                   |
| C <sub>6</sub> <sup>2-</sup> | 73.072           | 32               | 46.9                                   |

**22.** Cartesian coordinates in Å unit of optimized geometry of (H<sub>2</sub>C<sub>n</sub>)(H<sub>2</sub>) complexes at M06L/6-311++G(d,p) level.

| C <sub>2</sub> H <sub>4</sub> |             |              |              | C <sub>4</sub> H <sub>4</sub> |              |              |             |
|-------------------------------|-------------|--------------|--------------|-------------------------------|--------------|--------------|-------------|
| SCF Energy = -78.50984 a. u.  |             |              |              | SCF Energy = -154.67613 a. u. |              |              |             |
| 6                             | 0.442939000 | 0.612578000  | -0.000227000 | 6                             | -0.698064000 | -0.241906000 | 0.000024000 |
| 6                             | 0.530953000 | -0.585003000 | -0.001219000 |                               |              |              |             |

|                                   |              |              |              |   |              |              |              |
|-----------------------------------|--------------|--------------|--------------|---|--------------|--------------|--------------|
| 1                                 | 0.606461000  | -1.645338000 | -0.001974000 | 6 | 0.659333000  | -0.282124000 | -0.000027000 |
| 1                                 | -3.773094000 | -0.042385000 | -0.049672000 | 6 | 1.868588000  | -0.314998000 | -0.000097000 |
| 1                                 | -3.044276000 | -0.150661000 | 0.059927000  | 6 | -1.907198000 | -0.201261000 | 0.000143000  |
| 1                                 | 0.367559000  | 1.672929000  | 0.000399000  | 1 | -2.969067000 | -0.169315000 | 0.000200000  |
|                                   |              |              |              | 1 | -0.010026000 | 3.112181000  | -0.000195000 |
|                                   |              |              |              | 1 | 0.512606000  | 3.642589000  | -0.000175000 |
|                                   |              |              |              | 1 | 2.930535000  | -0.343725000 | -0.000088000 |
| <b>C<sub>6</sub>H<sub>4</sub></b> |              |              |              |   |              |              |              |
| SCF Energy = -230.84608 a. u.     |              |              |              |   |              |              |              |
| 6                                 | 3.087987000  | -0.346612000 | -0.000320000 |   |              |              |              |
| 6                                 | 1.876542000  | -0.288595000 | -0.000212000 |   |              |              |              |
| 6                                 | 0.530516000  | -0.219238000 | -0.000125000 |   |              |              |              |
| 1                                 | 4.149163000  | -0.398126000 | -0.000513000 |   |              |              |              |
| 6                                 | -0.688994000 | -0.151118000 | -0.000081000 |   |              |              |              |
| 6                                 | -2.034829000 | -0.077031000 | -0.000180000 |   |              |              |              |
| 6                                 | -3.245803000 | -0.009697000 | -0.000336000 |   |              |              |              |
| 1                                 | -4.306599000 | 0.049292000  | -0.000479000 |   |              |              |              |
| 1                                 | 1.338727000  | 3.119961000  | 0.050490000  |   |              |              |              |
| 1                                 | 1.666194000  | 3.782614000  | -0.041972000 |   |              |              |              |

23. Cartesian coordinates in Å unit of optimized geometry of (H<sub>2</sub>C<sub>n</sub>)(H<sub>2</sub>) complexes at CCSD/aug-cc-pVTZ level.

|                                   |              |              |              |                                   |              |              |              |
|-----------------------------------|--------------|--------------|--------------|-----------------------------------|--------------|--------------|--------------|
| <b>C<sub>2</sub>H<sub>4</sub></b> |              |              |              | <b>C<sub>4</sub>H<sub>4</sub></b> |              |              |              |
| CCSDT Energy = -78.36477 a. u.    |              |              |              | CCSDT Energy = -154.37732 a. u.   |              |              |              |
| 6                                 | 0.406169000  | 0.622449000  | -0.000042000 | 6                                 | 0.666459000  | -0.258907000 | 0.022215000  |
| 6                                 | 0.475218000  | -0.599258000 | -0.000040000 | 6                                 | -0.729534000 | -0.230653000 | -0.022257000 |
| 1                                 | 0.536396000  | -1.674529000 | -0.000083000 | 6                                 | -1.953445000 | -0.157490000 | 0.009687000  |
| 1                                 | -3.465678000 | -0.086808000 | -0.003010000 | 6                                 | 1.890941000  | -0.322877000 | -0.009672000 |
| 1                                 | -2.703608000 | -0.075505000 | 0.003641000  | 1                                 | 2.966192000  | -0.352410000 | 0.008413000  |
| 1                                 | 0.344571000  | 1.697697000  | -0.000059000 | 1                                 | 0.466897000  | 2.770112000  | 0.000875000  |
|                                   |              |              |              | 1                                 | 0.348844000  | 3.522750000  | -0.001682000 |
|                                   |              |              |              | 1                                 | -3.028460000 | -0.120893000 | -0.007449000 |
| <b>C<sub>6</sub>H<sub>4</sub></b> |              |              |              |                                   |              |              |              |
| CCSDT Energy = -230.39198 a. u.   |              |              |              |                                   |              |              |              |
| 6                                 | 3.234054000  | -0.160002000 | 0.004083000  |                                   |              |              |              |
| 6                                 | 2.007118000  | -0.170385000 | -0.011181000 |                                   |              |              |              |

|   |              |              |              |
|---|--------------|--------------|--------------|
| 6 | 0.616681000  | -0.174834000 | 0.026872000  |
| 1 | 4.309617000  | -0.152904000 | -0.012848000 |
| 6 | -0.612227000 | -0.177811000 | -0.025585000 |
| 6 | -2.002675000 | -0.175269000 | 0.011666000  |
| 6 | -3.229583000 | -0.168749000 | -0.005235000 |
| 1 | -4.305330000 | -0.164513000 | 0.010197000  |
| 1 | -0.040702000 | 2.858905000  | -0.005132000 |
| 1 | -0.043796000 | 3.620805000  | 0.004069000  |

24. Cartesian coordinates in Å unit of optimized geometry of  $(\text{HC}_n)^-(\text{H}_2)_m$  and  $(\text{C}_n)^{2-}(\text{H}_2)_m$  complexes at M06L/6-311++G(d,p) level.

|                                                                                                                                                                                                                                                                                                                                                                                                                                                                                                                                                                                                                                                                                                                                                                                                                                                                                                                                          |              |              |              |              |   |             |              |              |   |             |             |              |   |              |              |              |   |              |              |              |                                                                                                                                                                                                                                                                                                                                                                                                                                                                                                                                                                                                                                                                                                                                                       |              |              |              |              |              |             |              |             |              |              |             |             |              |              |              |                                                                                                                                                                                                                                                                                                                                                                                                                                                                                                                                                                                                                                                                                                                                                                                                                                                                                                                                                                                                                               |   |              |              |             |   |              |             |              |   |              |             |              |   |              |             |             |   |              |             |             |   |              |              |              |   |              |              |              |   |              |             |              |   |              |             |              |   |              |             |              |
|------------------------------------------------------------------------------------------------------------------------------------------------------------------------------------------------------------------------------------------------------------------------------------------------------------------------------------------------------------------------------------------------------------------------------------------------------------------------------------------------------------------------------------------------------------------------------------------------------------------------------------------------------------------------------------------------------------------------------------------------------------------------------------------------------------------------------------------------------------------------------------------------------------------------------------------|--------------|--------------|--------------|--------------|---|-------------|--------------|--------------|---|-------------|-------------|--------------|---|--------------|--------------|--------------|---|--------------|--------------|--------------|-------------------------------------------------------------------------------------------------------------------------------------------------------------------------------------------------------------------------------------------------------------------------------------------------------------------------------------------------------------------------------------------------------------------------------------------------------------------------------------------------------------------------------------------------------------------------------------------------------------------------------------------------------------------------------------------------------------------------------------------------------|--------------|--------------|--------------|--------------|--------------|-------------|--------------|-------------|--------------|--------------|-------------|-------------|--------------|--------------|--------------|-------------------------------------------------------------------------------------------------------------------------------------------------------------------------------------------------------------------------------------------------------------------------------------------------------------------------------------------------------------------------------------------------------------------------------------------------------------------------------------------------------------------------------------------------------------------------------------------------------------------------------------------------------------------------------------------------------------------------------------------------------------------------------------------------------------------------------------------------------------------------------------------------------------------------------------------------------------------------------------------------------------------------------|---|--------------|--------------|-------------|---|--------------|-------------|--------------|---|--------------|-------------|--------------|---|--------------|-------------|-------------|---|--------------|-------------|-------------|---|--------------|--------------|--------------|---|--------------|--------------|--------------|---|--------------|-------------|--------------|---|--------------|-------------|--------------|---|--------------|-------------|--------------|
| <p><b>C<sub>2</sub>H<sub>3</sub><sup>-</sup></b></p> <p>SCF Energy = -77.89940 a. u.</p> <table> <tbody> <tr> <td>6</td> <td>-0.278924000</td> <td>-0.054156000</td> <td>-0.000089000</td> </tr> <tr> <td>6</td> <td>0.964054000</td> <td>0.020001000</td> <td>-0.000027000</td> </tr> <tr> <td>1</td> <td>2.034346000</td> <td>0.088423000</td> <td>0.000269000</td> </tr> <tr> <td>1</td> <td>-3.454599000</td> <td>0.095213000</td> <td>-0.000792000</td> </tr> <tr> <td>1</td> <td>-2.690526000</td> <td>0.021293000</td> <td>0.001217000</td> </tr> </tbody> </table>                                                                                                                                                                                                                                                                                                                                                               | 6            | -0.278924000 | -0.054156000 | -0.000089000 | 6 | 0.964054000 | 0.020001000  | -0.000027000 | 1 | 2.034346000 | 0.088423000 | 0.000269000  | 1 | -3.454599000 | 0.095213000  | -0.000792000 | 1 | -2.690526000 | 0.021293000  | 0.001217000  | <p><b>C<sub>2</sub>H<sub>5</sub><sup>-</sup></b></p> <p>SCF Energy = -79.0758 a. u.</p> <table> <tbody> <tr> <td>6</td> <td>-0.015249000</td> <td>-0.107158000</td> <td>-0.007342000</td> </tr> <tr> <td>6</td> <td>1.223582000</td> <td>0.006869000</td> <td>0.002532000</td> </tr> <tr> <td>1</td> <td>2.291212000</td> <td>0.104044000</td> <td>0.011541000</td> </tr> <tr> <td>1</td> <td>-2.199066000</td> <td>-1.183365000</td> <td>0.001258000</td> </tr> <tr> <td>1</td> <td>-2.880823000</td> <td>-1.528701000</td> <td>0.009878000</td> </tr> <tr> <td>1</td> <td>-2.510234000</td> <td>1.864105000</td> <td>0.004331000</td> </tr> <tr> <td>1</td> <td>-1.951090000</td> <td>1.345654000</td> <td>0.001850000</td> </tr> </tbody> </table> | 6            | -0.015249000 | -0.107158000 | -0.007342000 | 6            | 1.223582000 | 0.006869000  | 0.002532000 | 1            | 2.291212000  | 0.104044000 | 0.011541000 | 1            | -2.199066000 | -1.183365000 | 0.001258000                                                                                                                                                                                                                                                                                                                                                                                                                                                                                                                                                                                                                                                                                                                                                                                                                                                                                                                                                                                                                   | 1 | -2.880823000 | -1.528701000 | 0.009878000 | 1 | -2.510234000 | 1.864105000 | 0.004331000  | 1 | -1.951090000 | 1.345654000 | 0.001850000  |   |              |             |             |   |              |             |             |   |              |              |              |   |              |              |              |   |              |             |              |   |              |             |              |   |              |             |              |
| 6                                                                                                                                                                                                                                                                                                                                                                                                                                                                                                                                                                                                                                                                                                                                                                                                                                                                                                                                        | -0.278924000 | -0.054156000 | -0.000089000 |              |   |             |              |              |   |             |             |              |   |              |              |              |   |              |              |              |                                                                                                                                                                                                                                                                                                                                                                                                                                                                                                                                                                                                                                                                                                                                                       |              |              |              |              |              |             |              |             |              |              |             |             |              |              |              |                                                                                                                                                                                                                                                                                                                                                                                                                                                                                                                                                                                                                                                                                                                                                                                                                                                                                                                                                                                                                               |   |              |              |             |   |              |             |              |   |              |             |              |   |              |             |             |   |              |             |             |   |              |              |              |   |              |              |              |   |              |             |              |   |              |             |              |   |              |             |              |
| 6                                                                                                                                                                                                                                                                                                                                                                                                                                                                                                                                                                                                                                                                                                                                                                                                                                                                                                                                        | 0.964054000  | 0.020001000  | -0.000027000 |              |   |             |              |              |   |             |             |              |   |              |              |              |   |              |              |              |                                                                                                                                                                                                                                                                                                                                                                                                                                                                                                                                                                                                                                                                                                                                                       |              |              |              |              |              |             |              |             |              |              |             |             |              |              |              |                                                                                                                                                                                                                                                                                                                                                                                                                                                                                                                                                                                                                                                                                                                                                                                                                                                                                                                                                                                                                               |   |              |              |             |   |              |             |              |   |              |             |              |   |              |             |             |   |              |             |             |   |              |              |              |   |              |              |              |   |              |             |              |   |              |             |              |   |              |             |              |
| 1                                                                                                                                                                                                                                                                                                                                                                                                                                                                                                                                                                                                                                                                                                                                                                                                                                                                                                                                        | 2.034346000  | 0.088423000  | 0.000269000  |              |   |             |              |              |   |             |             |              |   |              |              |              |   |              |              |              |                                                                                                                                                                                                                                                                                                                                                                                                                                                                                                                                                                                                                                                                                                                                                       |              |              |              |              |              |             |              |             |              |              |             |             |              |              |              |                                                                                                                                                                                                                                                                                                                                                                                                                                                                                                                                                                                                                                                                                                                                                                                                                                                                                                                                                                                                                               |   |              |              |             |   |              |             |              |   |              |             |              |   |              |             |             |   |              |             |             |   |              |              |              |   |              |              |              |   |              |             |              |   |              |             |              |   |              |             |              |
| 1                                                                                                                                                                                                                                                                                                                                                                                                                                                                                                                                                                                                                                                                                                                                                                                                                                                                                                                                        | -3.454599000 | 0.095213000  | -0.000792000 |              |   |             |              |              |   |             |             |              |   |              |              |              |   |              |              |              |                                                                                                                                                                                                                                                                                                                                                                                                                                                                                                                                                                                                                                                                                                                                                       |              |              |              |              |              |             |              |             |              |              |             |             |              |              |              |                                                                                                                                                                                                                                                                                                                                                                                                                                                                                                                                                                                                                                                                                                                                                                                                                                                                                                                                                                                                                               |   |              |              |             |   |              |             |              |   |              |             |              |   |              |             |             |   |              |             |             |   |              |              |              |   |              |              |              |   |              |             |              |   |              |             |              |   |              |             |              |
| 1                                                                                                                                                                                                                                                                                                                                                                                                                                                                                                                                                                                                                                                                                                                                                                                                                                                                                                                                        | -2.690526000 | 0.021293000  | 0.001217000  |              |   |             |              |              |   |             |             |              |   |              |              |              |   |              |              |              |                                                                                                                                                                                                                                                                                                                                                                                                                                                                                                                                                                                                                                                                                                                                                       |              |              |              |              |              |             |              |             |              |              |             |             |              |              |              |                                                                                                                                                                                                                                                                                                                                                                                                                                                                                                                                                                                                                                                                                                                                                                                                                                                                                                                                                                                                                               |   |              |              |             |   |              |             |              |   |              |             |              |   |              |             |             |   |              |             |             |   |              |              |              |   |              |              |              |   |              |             |              |   |              |             |              |   |              |             |              |
| 6                                                                                                                                                                                                                                                                                                                                                                                                                                                                                                                                                                                                                                                                                                                                                                                                                                                                                                                                        | -0.015249000 | -0.107158000 | -0.007342000 |              |   |             |              |              |   |             |             |              |   |              |              |              |   |              |              |              |                                                                                                                                                                                                                                                                                                                                                                                                                                                                                                                                                                                                                                                                                                                                                       |              |              |              |              |              |             |              |             |              |              |             |             |              |              |              |                                                                                                                                                                                                                                                                                                                                                                                                                                                                                                                                                                                                                                                                                                                                                                                                                                                                                                                                                                                                                               |   |              |              |             |   |              |             |              |   |              |             |              |   |              |             |             |   |              |             |             |   |              |              |              |   |              |              |              |   |              |             |              |   |              |             |              |   |              |             |              |
| 6                                                                                                                                                                                                                                                                                                                                                                                                                                                                                                                                                                                                                                                                                                                                                                                                                                                                                                                                        | 1.223582000  | 0.006869000  | 0.002532000  |              |   |             |              |              |   |             |             |              |   |              |              |              |   |              |              |              |                                                                                                                                                                                                                                                                                                                                                                                                                                                                                                                                                                                                                                                                                                                                                       |              |              |              |              |              |             |              |             |              |              |             |             |              |              |              |                                                                                                                                                                                                                                                                                                                                                                                                                                                                                                                                                                                                                                                                                                                                                                                                                                                                                                                                                                                                                               |   |              |              |             |   |              |             |              |   |              |             |              |   |              |             |             |   |              |             |             |   |              |              |              |   |              |              |              |   |              |             |              |   |              |             |              |   |              |             |              |
| 1                                                                                                                                                                                                                                                                                                                                                                                                                                                                                                                                                                                                                                                                                                                                                                                                                                                                                                                                        | 2.291212000  | 0.104044000  | 0.011541000  |              |   |             |              |              |   |             |             |              |   |              |              |              |   |              |              |              |                                                                                                                                                                                                                                                                                                                                                                                                                                                                                                                                                                                                                                                                                                                                                       |              |              |              |              |              |             |              |             |              |              |             |             |              |              |              |                                                                                                                                                                                                                                                                                                                                                                                                                                                                                                                                                                                                                                                                                                                                                                                                                                                                                                                                                                                                                               |   |              |              |             |   |              |             |              |   |              |             |              |   |              |             |             |   |              |             |             |   |              |              |              |   |              |              |              |   |              |             |              |   |              |             |              |   |              |             |              |
| 1                                                                                                                                                                                                                                                                                                                                                                                                                                                                                                                                                                                                                                                                                                                                                                                                                                                                                                                                        | -2.199066000 | -1.183365000 | 0.001258000  |              |   |             |              |              |   |             |             |              |   |              |              |              |   |              |              |              |                                                                                                                                                                                                                                                                                                                                                                                                                                                                                                                                                                                                                                                                                                                                                       |              |              |              |              |              |             |              |             |              |              |             |             |              |              |              |                                                                                                                                                                                                                                                                                                                                                                                                                                                                                                                                                                                                                                                                                                                                                                                                                                                                                                                                                                                                                               |   |              |              |             |   |              |             |              |   |              |             |              |   |              |             |             |   |              |             |             |   |              |              |              |   |              |              |              |   |              |             |              |   |              |             |              |   |              |             |              |
| 1                                                                                                                                                                                                                                                                                                                                                                                                                                                                                                                                                                                                                                                                                                                                                                                                                                                                                                                                        | -2.880823000 | -1.528701000 | 0.009878000  |              |   |             |              |              |   |             |             |              |   |              |              |              |   |              |              |              |                                                                                                                                                                                                                                                                                                                                                                                                                                                                                                                                                                                                                                                                                                                                                       |              |              |              |              |              |             |              |             |              |              |             |             |              |              |              |                                                                                                                                                                                                                                                                                                                                                                                                                                                                                                                                                                                                                                                                                                                                                                                                                                                                                                                                                                                                                               |   |              |              |             |   |              |             |              |   |              |             |              |   |              |             |             |   |              |             |             |   |              |              |              |   |              |              |              |   |              |             |              |   |              |             |              |   |              |             |              |
| 1                                                                                                                                                                                                                                                                                                                                                                                                                                                                                                                                                                                                                                                                                                                                                                                                                                                                                                                                        | -2.510234000 | 1.864105000  | 0.004331000  |              |   |             |              |              |   |             |             |              |   |              |              |              |   |              |              |              |                                                                                                                                                                                                                                                                                                                                                                                                                                                                                                                                                                                                                                                                                                                                                       |              |              |              |              |              |             |              |             |              |              |             |             |              |              |              |                                                                                                                                                                                                                                                                                                                                                                                                                                                                                                                                                                                                                                                                                                                                                                                                                                                                                                                                                                                                                               |   |              |              |             |   |              |             |              |   |              |             |              |   |              |             |             |   |              |             |             |   |              |              |              |   |              |              |              |   |              |             |              |   |              |             |              |   |              |             |              |
| 1                                                                                                                                                                                                                                                                                                                                                                                                                                                                                                                                                                                                                                                                                                                                                                                                                                                                                                                                        | -1.951090000 | 1.345654000  | 0.001850000  |              |   |             |              |              |   |             |             |              |   |              |              |              |   |              |              |              |                                                                                                                                                                                                                                                                                                                                                                                                                                                                                                                                                                                                                                                                                                                                                       |              |              |              |              |              |             |              |             |              |              |             |             |              |              |              |                                                                                                                                                                                                                                                                                                                                                                                                                                                                                                                                                                                                                                                                                                                                                                                                                                                                                                                                                                                                                               |   |              |              |             |   |              |             |              |   |              |             |              |   |              |             |             |   |              |             |             |   |              |              |              |   |              |              |              |   |              |             |              |   |              |             |              |   |              |             |              |
| <p><b>C<sub>2</sub>H<sub>7</sub><sup>-</sup></b></p> <p>SCF Energy = -80.25260 a. u.</p> <table> <tbody> <tr> <td>6</td> <td>0.207124000</td> <td>-0.044801000</td> <td>0.027510000</td> </tr> <tr> <td>6</td> <td>1.449084000</td> <td>-0.001409000</td> <td>0.001202000</td> </tr> <tr> <td>1</td> <td>2.519780000</td> <td>0.037873000</td> <td>-0.022966000</td> </tr> <tr> <td>1</td> <td>-1.785221000</td> <td>-0.988078000</td> <td>-1.040084000</td> </tr> <tr> <td>1</td> <td>-2.405129000</td> <td>-1.287594000</td> <td>-1.364612000</td> </tr> <tr> <td>1</td> <td>-2.245647000</td> <td>1.953824000</td> <td>-0.463605000</td> </tr> <tr> <td>1</td> <td>-1.692974000</td> <td>1.444800000</td> <td>-0.345167000</td> </tr> <tr> <td>1</td> <td>-2.494647000</td> <td>-0.492099000</td> <td>1.713746000</td> </tr> <tr> <td>1</td> <td>-1.833411000</td> <td>-0.391466000</td> <td>1.350418000</td> </tr> </tbody> </table> | 6            | 0.207124000  | -0.044801000 | 0.027510000  | 6 | 1.449084000 | -0.001409000 | 0.001202000  | 1 | 2.519780000 | 0.037873000 | -0.022966000 | 1 | -1.785221000 | -0.988078000 | -1.040084000 | 1 | -2.405129000 | -1.287594000 | -1.364612000 | 1                                                                                                                                                                                                                                                                                                                                                                                                                                                                                                                                                                                                                                                                                                                                                     | -2.245647000 | 1.953824000  | -0.463605000 | 1            | -1.692974000 | 1.444800000 | -0.345167000 | 1           | -2.494647000 | -0.492099000 | 1.713746000 | 1           | -1.833411000 | -0.391466000 | 1.350418000  | <p><b>C<sub>2</sub>H<sub>9</sub><sup>-</sup></b></p> <p>SCF Energy = -81.42890 a. u.</p> <table> <tbody> <tr> <td>6</td> <td>0.292128000</td> <td>-0.005290000</td> <td>0.014177000</td> </tr> <tr> <td>6</td> <td>1.534431000</td> <td>0.001521000</td> <td>-0.001579000</td> </tr> <tr> <td>1</td> <td>2.605748000</td> <td>0.007779000</td> <td>-0.016481000</td> </tr> <tr> <td>1</td> <td>-1.852488000</td> <td>0.001523000</td> <td>1.248375000</td> </tr> <tr> <td>1</td> <td>-2.524752000</td> <td>0.011473000</td> <td>1.602796000</td> </tr> <tr> <td>1</td> <td>-1.381318000</td> <td>-2.751362000</td> <td>-0.044105000</td> </tr> <tr> <td>1</td> <td>-1.022255000</td> <td>-2.083827000</td> <td>-0.017388000</td> </tr> <tr> <td>1</td> <td>-2.531034000</td> <td>0.009130000</td> <td>-1.569497000</td> </tr> <tr> <td>1</td> <td>-1.858572000</td> <td>0.000812000</td> <td>-1.215999000</td> </tr> <tr> <td>1</td> <td>-1.018196000</td> <td>2.079686000</td> <td>-0.017859000</td> </tr> </tbody> </table> | 6 | 0.292128000  | -0.005290000 | 0.014177000 | 6 | 1.534431000  | 0.001521000 | -0.001579000 | 1 | 2.605748000  | 0.007779000 | -0.016481000 | 1 | -1.852488000 | 0.001523000 | 1.248375000 | 1 | -2.524752000 | 0.011473000 | 1.602796000 | 1 | -1.381318000 | -2.751362000 | -0.044105000 | 1 | -1.022255000 | -2.083827000 | -0.017388000 | 1 | -2.531034000 | 0.009130000 | -1.569497000 | 1 | -1.858572000 | 0.000812000 | -1.215999000 | 1 | -1.018196000 | 2.079686000 | -0.017859000 |
| 6                                                                                                                                                                                                                                                                                                                                                                                                                                                                                                                                                                                                                                                                                                                                                                                                                                                                                                                                        | 0.207124000  | -0.044801000 | 0.027510000  |              |   |             |              |              |   |             |             |              |   |              |              |              |   |              |              |              |                                                                                                                                                                                                                                                                                                                                                                                                                                                                                                                                                                                                                                                                                                                                                       |              |              |              |              |              |             |              |             |              |              |             |             |              |              |              |                                                                                                                                                                                                                                                                                                                                                                                                                                                                                                                                                                                                                                                                                                                                                                                                                                                                                                                                                                                                                               |   |              |              |             |   |              |             |              |   |              |             |              |   |              |             |             |   |              |             |             |   |              |              |              |   |              |              |              |   |              |             |              |   |              |             |              |   |              |             |              |
| 6                                                                                                                                                                                                                                                                                                                                                                                                                                                                                                                                                                                                                                                                                                                                                                                                                                                                                                                                        | 1.449084000  | -0.001409000 | 0.001202000  |              |   |             |              |              |   |             |             |              |   |              |              |              |   |              |              |              |                                                                                                                                                                                                                                                                                                                                                                                                                                                                                                                                                                                                                                                                                                                                                       |              |              |              |              |              |             |              |             |              |              |             |             |              |              |              |                                                                                                                                                                                                                                                                                                                                                                                                                                                                                                                                                                                                                                                                                                                                                                                                                                                                                                                                                                                                                               |   |              |              |             |   |              |             |              |   |              |             |              |   |              |             |             |   |              |             |             |   |              |              |              |   |              |              |              |   |              |             |              |   |              |             |              |   |              |             |              |
| 1                                                                                                                                                                                                                                                                                                                                                                                                                                                                                                                                                                                                                                                                                                                                                                                                                                                                                                                                        | 2.519780000  | 0.037873000  | -0.022966000 |              |   |             |              |              |   |             |             |              |   |              |              |              |   |              |              |              |                                                                                                                                                                                                                                                                                                                                                                                                                                                                                                                                                                                                                                                                                                                                                       |              |              |              |              |              |             |              |             |              |              |             |             |              |              |              |                                                                                                                                                                                                                                                                                                                                                                                                                                                                                                                                                                                                                                                                                                                                                                                                                                                                                                                                                                                                                               |   |              |              |             |   |              |             |              |   |              |             |              |   |              |             |             |   |              |             |             |   |              |              |              |   |              |              |              |   |              |             |              |   |              |             |              |   |              |             |              |
| 1                                                                                                                                                                                                                                                                                                                                                                                                                                                                                                                                                                                                                                                                                                                                                                                                                                                                                                                                        | -1.785221000 | -0.988078000 | -1.040084000 |              |   |             |              |              |   |             |             |              |   |              |              |              |   |              |              |              |                                                                                                                                                                                                                                                                                                                                                                                                                                                                                                                                                                                                                                                                                                                                                       |              |              |              |              |              |             |              |             |              |              |             |             |              |              |              |                                                                                                                                                                                                                                                                                                                                                                                                                                                                                                                                                                                                                                                                                                                                                                                                                                                                                                                                                                                                                               |   |              |              |             |   |              |             |              |   |              |             |              |   |              |             |             |   |              |             |             |   |              |              |              |   |              |              |              |   |              |             |              |   |              |             |              |   |              |             |              |
| 1                                                                                                                                                                                                                                                                                                                                                                                                                                                                                                                                                                                                                                                                                                                                                                                                                                                                                                                                        | -2.405129000 | -1.287594000 | -1.364612000 |              |   |             |              |              |   |             |             |              |   |              |              |              |   |              |              |              |                                                                                                                                                                                                                                                                                                                                                                                                                                                                                                                                                                                                                                                                                                                                                       |              |              |              |              |              |             |              |             |              |              |             |             |              |              |              |                                                                                                                                                                                                                                                                                                                                                                                                                                                                                                                                                                                                                                                                                                                                                                                                                                                                                                                                                                                                                               |   |              |              |             |   |              |             |              |   |              |             |              |   |              |             |             |   |              |             |             |   |              |              |              |   |              |              |              |   |              |             |              |   |              |             |              |   |              |             |              |
| 1                                                                                                                                                                                                                                                                                                                                                                                                                                                                                                                                                                                                                                                                                                                                                                                                                                                                                                                                        | -2.245647000 | 1.953824000  | -0.463605000 |              |   |             |              |              |   |             |             |              |   |              |              |              |   |              |              |              |                                                                                                                                                                                                                                                                                                                                                                                                                                                                                                                                                                                                                                                                                                                                                       |              |              |              |              |              |             |              |             |              |              |             |             |              |              |              |                                                                                                                                                                                                                                                                                                                                                                                                                                                                                                                                                                                                                                                                                                                                                                                                                                                                                                                                                                                                                               |   |              |              |             |   |              |             |              |   |              |             |              |   |              |             |             |   |              |             |             |   |              |              |              |   |              |              |              |   |              |             |              |   |              |             |              |   |              |             |              |
| 1                                                                                                                                                                                                                                                                                                                                                                                                                                                                                                                                                                                                                                                                                                                                                                                                                                                                                                                                        | -1.692974000 | 1.444800000  | -0.345167000 |              |   |             |              |              |   |             |             |              |   |              |              |              |   |              |              |              |                                                                                                                                                                                                                                                                                                                                                                                                                                                                                                                                                                                                                                                                                                                                                       |              |              |              |              |              |             |              |             |              |              |             |             |              |              |              |                                                                                                                                                                                                                                                                                                                                                                                                                                                                                                                                                                                                                                                                                                                                                                                                                                                                                                                                                                                                                               |   |              |              |             |   |              |             |              |   |              |             |              |   |              |             |             |   |              |             |             |   |              |              |              |   |              |              |              |   |              |             |              |   |              |             |              |   |              |             |              |
| 1                                                                                                                                                                                                                                                                                                                                                                                                                                                                                                                                                                                                                                                                                                                                                                                                                                                                                                                                        | -2.494647000 | -0.492099000 | 1.713746000  |              |   |             |              |              |   |             |             |              |   |              |              |              |   |              |              |              |                                                                                                                                                                                                                                                                                                                                                                                                                                                                                                                                                                                                                                                                                                                                                       |              |              |              |              |              |             |              |             |              |              |             |             |              |              |              |                                                                                                                                                                                                                                                                                                                                                                                                                                                                                                                                                                                                                                                                                                                                                                                                                                                                                                                                                                                                                               |   |              |              |             |   |              |             |              |   |              |             |              |   |              |             |             |   |              |             |             |   |              |              |              |   |              |              |              |   |              |             |              |   |              |             |              |   |              |             |              |
| 1                                                                                                                                                                                                                                                                                                                                                                                                                                                                                                                                                                                                                                                                                                                                                                                                                                                                                                                                        | -1.833411000 | -0.391466000 | 1.350418000  |              |   |             |              |              |   |             |             |              |   |              |              |              |   |              |              |              |                                                                                                                                                                                                                                                                                                                                                                                                                                                                                                                                                                                                                                                                                                                                                       |              |              |              |              |              |             |              |             |              |              |             |             |              |              |              |                                                                                                                                                                                                                                                                                                                                                                                                                                                                                                                                                                                                                                                                                                                                                                                                                                                                                                                                                                                                                               |   |              |              |             |   |              |             |              |   |              |             |              |   |              |             |             |   |              |             |             |   |              |              |              |   |              |              |              |   |              |             |              |   |              |             |              |   |              |             |              |
| 6                                                                                                                                                                                                                                                                                                                                                                                                                                                                                                                                                                                                                                                                                                                                                                                                                                                                                                                                        | 0.292128000  | -0.005290000 | 0.014177000  |              |   |             |              |              |   |             |             |              |   |              |              |              |   |              |              |              |                                                                                                                                                                                                                                                                                                                                                                                                                                                                                                                                                                                                                                                                                                                                                       |              |              |              |              |              |             |              |             |              |              |             |             |              |              |              |                                                                                                                                                                                                                                                                                                                                                                                                                                                                                                                                                                                                                                                                                                                                                                                                                                                                                                                                                                                                                               |   |              |              |             |   |              |             |              |   |              |             |              |   |              |             |             |   |              |             |             |   |              |              |              |   |              |              |              |   |              |             |              |   |              |             |              |   |              |             |              |
| 6                                                                                                                                                                                                                                                                                                                                                                                                                                                                                                                                                                                                                                                                                                                                                                                                                                                                                                                                        | 1.534431000  | 0.001521000  | -0.001579000 |              |   |             |              |              |   |             |             |              |   |              |              |              |   |              |              |              |                                                                                                                                                                                                                                                                                                                                                                                                                                                                                                                                                                                                                                                                                                                                                       |              |              |              |              |              |             |              |             |              |              |             |             |              |              |              |                                                                                                                                                                                                                                                                                                                                                                                                                                                                                                                                                                                                                                                                                                                                                                                                                                                                                                                                                                                                                               |   |              |              |             |   |              |             |              |   |              |             |              |   |              |             |             |   |              |             |             |   |              |              |              |   |              |              |              |   |              |             |              |   |              |             |              |   |              |             |              |
| 1                                                                                                                                                                                                                                                                                                                                                                                                                                                                                                                                                                                                                                                                                                                                                                                                                                                                                                                                        | 2.605748000  | 0.007779000  | -0.016481000 |              |   |             |              |              |   |             |             |              |   |              |              |              |   |              |              |              |                                                                                                                                                                                                                                                                                                                                                                                                                                                                                                                                                                                                                                                                                                                                                       |              |              |              |              |              |             |              |             |              |              |             |             |              |              |              |                                                                                                                                                                                                                                                                                                                                                                                                                                                                                                                                                                                                                                                                                                                                                                                                                                                                                                                                                                                                                               |   |              |              |             |   |              |             |              |   |              |             |              |   |              |             |             |   |              |             |             |   |              |              |              |   |              |              |              |   |              |             |              |   |              |             |              |   |              |             |              |
| 1                                                                                                                                                                                                                                                                                                                                                                                                                                                                                                                                                                                                                                                                                                                                                                                                                                                                                                                                        | -1.852488000 | 0.001523000  | 1.248375000  |              |   |             |              |              |   |             |             |              |   |              |              |              |   |              |              |              |                                                                                                                                                                                                                                                                                                                                                                                                                                                                                                                                                                                                                                                                                                                                                       |              |              |              |              |              |             |              |             |              |              |             |             |              |              |              |                                                                                                                                                                                                                                                                                                                                                                                                                                                                                                                                                                                                                                                                                                                                                                                                                                                                                                                                                                                                                               |   |              |              |             |   |              |             |              |   |              |             |              |   |              |             |             |   |              |             |             |   |              |              |              |   |              |              |              |   |              |             |              |   |              |             |              |   |              |             |              |
| 1                                                                                                                                                                                                                                                                                                                                                                                                                                                                                                                                                                                                                                                                                                                                                                                                                                                                                                                                        | -2.524752000 | 0.011473000  | 1.602796000  |              |   |             |              |              |   |             |             |              |   |              |              |              |   |              |              |              |                                                                                                                                                                                                                                                                                                                                                                                                                                                                                                                                                                                                                                                                                                                                                       |              |              |              |              |              |             |              |             |              |              |             |             |              |              |              |                                                                                                                                                                                                                                                                                                                                                                                                                                                                                                                                                                                                                                                                                                                                                                                                                                                                                                                                                                                                                               |   |              |              |             |   |              |             |              |   |              |             |              |   |              |             |             |   |              |             |             |   |              |              |              |   |              |              |              |   |              |             |              |   |              |             |              |   |              |             |              |
| 1                                                                                                                                                                                                                                                                                                                                                                                                                                                                                                                                                                                                                                                                                                                                                                                                                                                                                                                                        | -1.381318000 | -2.751362000 | -0.044105000 |              |   |             |              |              |   |             |             |              |   |              |              |              |   |              |              |              |                                                                                                                                                                                                                                                                                                                                                                                                                                                                                                                                                                                                                                                                                                                                                       |              |              |              |              |              |             |              |             |              |              |             |             |              |              |              |                                                                                                                                                                                                                                                                                                                                                                                                                                                                                                                                                                                                                                                                                                                                                                                                                                                                                                                                                                                                                               |   |              |              |             |   |              |             |              |   |              |             |              |   |              |             |             |   |              |             |             |   |              |              |              |   |              |              |              |   |              |             |              |   |              |             |              |   |              |             |              |
| 1                                                                                                                                                                                                                                                                                                                                                                                                                                                                                                                                                                                                                                                                                                                                                                                                                                                                                                                                        | -1.022255000 | -2.083827000 | -0.017388000 |              |   |             |              |              |   |             |             |              |   |              |              |              |   |              |              |              |                                                                                                                                                                                                                                                                                                                                                                                                                                                                                                                                                                                                                                                                                                                                                       |              |              |              |              |              |             |              |             |              |              |             |             |              |              |              |                                                                                                                                                                                                                                                                                                                                                                                                                                                                                                                                                                                                                                                                                                                                                                                                                                                                                                                                                                                                                               |   |              |              |             |   |              |             |              |   |              |             |              |   |              |             |             |   |              |             |             |   |              |              |              |   |              |              |              |   |              |             |              |   |              |             |              |   |              |             |              |
| 1                                                                                                                                                                                                                                                                                                                                                                                                                                                                                                                                                                                                                                                                                                                                                                                                                                                                                                                                        | -2.531034000 | 0.009130000  | -1.569497000 |              |   |             |              |              |   |             |             |              |   |              |              |              |   |              |              |              |                                                                                                                                                                                                                                                                                                                                                                                                                                                                                                                                                                                                                                                                                                                                                       |              |              |              |              |              |             |              |             |              |              |             |             |              |              |              |                                                                                                                                                                                                                                                                                                                                                                                                                                                                                                                                                                                                                                                                                                                                                                                                                                                                                                                                                                                                                               |   |              |              |             |   |              |             |              |   |              |             |              |   |              |             |             |   |              |             |             |   |              |              |              |   |              |              |              |   |              |             |              |   |              |             |              |   |              |             |              |
| 1                                                                                                                                                                                                                                                                                                                                                                                                                                                                                                                                                                                                                                                                                                                                                                                                                                                                                                                                        | -1.858572000 | 0.000812000  | -1.215999000 |              |   |             |              |              |   |             |             |              |   |              |              |              |   |              |              |              |                                                                                                                                                                                                                                                                                                                                                                                                                                                                                                                                                                                                                                                                                                                                                       |              |              |              |              |              |             |              |             |              |              |             |             |              |              |              |                                                                                                                                                                                                                                                                                                                                                                                                                                                                                                                                                                                                                                                                                                                                                                                                                                                                                                                                                                                                                               |   |              |              |             |   |              |             |              |   |              |             |              |   |              |             |             |   |              |             |             |   |              |              |              |   |              |              |              |   |              |             |              |   |              |             |              |   |              |             |              |
| 1                                                                                                                                                                                                                                                                                                                                                                                                                                                                                                                                                                                                                                                                                                                                                                                                                                                                                                                                        | -1.018196000 | 2.079686000  | -0.017859000 |              |   |             |              |              |   |             |             |              |   |              |              |              |   |              |              |              |                                                                                                                                                                                                                                                                                                                                                                                                                                                                                                                                                                                                                                                                                                                                                       |              |              |              |              |              |             |              |             |              |              |             |             |              |              |              |                                                                                                                                                                                                                                                                                                                                                                                                                                                                                                                                                                                                                                                                                                                                                                                                                                                                                                                                                                                                                               |   |              |              |             |   |              |             |              |   |              |             |              |   |              |             |             |   |              |             |             |   |              |              |              |   |              |              |              |   |              |             |              |   |              |             |              |   |              |             |              |

|                                                |              |              |              |                                                |              |              |              |
|------------------------------------------------|--------------|--------------|--------------|------------------------------------------------|--------------|--------------|--------------|
| <b>C<sub>2</sub>H<sub>11</sub><sup>-</sup></b> |              |              |              | <b>C<sub>2</sub>H<sub>13</sub><sup>-</sup></b> |              |              |              |
| SCF Energy = -82.60480 a. u.                   |              |              |              | SCF Energy = -83.78069 a. u.                   |              |              |              |
| 6                                              | 0.278700000  | -0.278589000 | 0.099744000  | 6                                              | 0.299171000  | -0.013399000 | 0.256655000  |
| 6                                              | 1.520193000  | -0.303059000 | 0.125779000  | 6                                              | 1.540541000  | -0.008416000 | 0.295330000  |
| 1                                              | 2.591181000  | -0.322378000 | 0.145849000  | 1                                              | 2.611399000  | -0.003768000 | 0.326911000  |
| 1                                              | -1.852672000 | -0.804179000 | 1.234259000  | 1                                              | -1.893225000 | 1.212472000  | 0.225853000  |
| 1                                              | -2.517206000 | -0.942862000 | 1.575718000  | 1                                              | -2.562385000 | 1.565790000  | 0.183666000  |
| 1                                              | -1.683085000 | -2.368231000 | -1.398683000 | 1                                              | -1.704368000 | -0.099660000 | 2.808305000  |
| 1                                              | -1.236722000 | -1.898337000 | -1.005883000 | 1                                              | -1.191352000 | -0.087541000 | 2.251889000  |
| 1                                              | -2.512946000 | 0.790046000  | -1.166098000 | 1                                              | -2.566252000 | -1.578027000 | 0.060723000  |
| 1                                              | -1.875234000 | 0.513998000  | -0.861135000 | 1                                              | -1.897486000 | -1.227734000 | 0.127319000  |
| 1                                              | -0.917093000 | 1.607445000  | 1.201662000  | 1                                              | -1.025779000 | 0.077062000  | -1.857526000 |
| 1                                              | -1.249406000 | 2.208959000  | 1.519011000  | 1                                              | -1.375774000 | 0.129803000  | -2.526260000 |
| 1                                              | 0.185086000  | 2.687836000  | -1.466599000 | 1                                              | 0.090404000  | 2.932568000  | -1.315723000 |
| 1                                              | 0.274745000  | 2.017592000  | -1.131236000 | 1                                              | 0.193809000  | 2.266799000  | -0.975414000 |
|                                                |              |              |              | 1                                              | 0.089747000  | -2.857929000 | -1.487456000 |
|                                                |              |              |              | 1                                              | 0.192988000  | -2.198942000 | -1.134198000 |
| <b>C<sub>2</sub>H<sub>15</sub><sup>-</sup></b> |              |              |              | <b>C<sub>2</sub>H<sub>17</sub><sup>-</sup></b> |              |              |              |
| SCF Energy = -84.95693 a. u.                   |              |              |              | SCF Energy = -86.13307 a. u.                   |              |              |              |
| 6                                              | 0.160169000  | -0.253236000 | -0.246409000 | 6                                              | 0.000355000  | -0.301136000 | -0.050851000 |
| 6                                              | 0.787162000  | -1.324930000 | -0.270517000 | 6                                              | -0.000887000 | -1.540900000 | -0.119106000 |
| 1                                              | 1.332022000  | -2.247009000 | -0.290747000 | 1                                              | -0.002252000 | -2.610480000 | -0.179055000 |
| 1                                              | -1.629434000 | 1.361082000  | 0.488672000  | 1                                              | 1.252355000  | 1.894287000  | 0.179799000  |
| 1                                              | -2.161983000 | 1.852007000  | 0.711732000  | 1                                              | 1.652542000  | 2.532685000  | 0.249323000  |
| 1                                              | -1.872445000 | 0.985417000  | -2.458000000 | 1                                              | -1.650807000 | 2.533108000  | 0.253118000  |
| 1                                              | -1.375630000 | 0.747283000  | -1.939328000 | 1                                              | -1.251005000 | 1.894607000  | 0.182898000  |
| 1                                              | 0.436164000  | 2.944656000  | -0.859994000 | 1                                              | -2.864237000 | 0.173126000  | -1.722208000 |
| 1                                              | 0.336448000  | 2.204348000  | -0.737505000 | 1                                              | -2.222987000 | 0.010736000  | -1.360122000 |
| 1                                              | 0.600793000  | 1.290404000  | 1.690730000  | 1                                              | -2.241249000 | -0.256887000 | 1.311638000  |
| 1                                              | 0.726343000  | 1.660236000  | 2.337390000  | 1                                              | -2.881294000 | -0.160683000 | 1.698221000  |
| 1                                              | -1.404123000 | -0.783144000 | 2.677392000  | 1                                              | -0.002593000 | 1.813599000  | -2.548440000 |
| 1                                              | -1.054929000 | -0.706634000 | 2.013023000  | 1                                              | -0.001766000 | 1.332733000  | -1.965193000 |
| 1                                              | -3.019538000 | -1.167929000 | -0.166895000 | 1                                              | 2.221352000  | 0.009022000  | -1.362307000 |
| 1                                              | -2.281980000 | -1.033037000 | -0.251209000 | 1                                              | 2.862681000  | 0.170231000  | -1.724811000 |
| 1                                              | 3.118747000  | 1.436466000  | -0.047573000 | 1                                              | 2.882989000  | -0.162307000 | 1.694877000  |
| 1                                              | 2.565556000  | 0.924854000  | -0.066134000 | 1                                              | 2.242526000  | -0.257790000 | 1.308747000  |
|                                                |              |              |              | 1                                              | 0.003592000  | 1.243981000  | 2.835995000  |
|                                                |              |              |              | 1                                              | 0.003343000  | 0.892248000  | 2.167263000  |
| <b>C<sub>2</sub>H<sub>19</sub><sup>-</sup></b> |              |              |              | <b>C<sub>2</sub>H<sub>21</sub><sup>-</sup></b> |              |              |              |
| SCF Energy = -87.30944 a. u.                   |              |              |              | SCF Energy = -88.48485 a. u.                   |              |              |              |
| 6                                              | -0.020371000 | -0.014234000 | -0.248668000 | 6                                              | -0.003362000 | -0.006465000 | -0.133098000 |
| 6                                              | 0.082486000  | 0.164768000  | -1.473162000 | 6                                              | 0.018575000  | -0.093300000 | -1.371761000 |
| 1                                              | 0.172783000  | 0.320409000  | -2.529264000 | 1                                              | 0.037242000  | -0.168626000 | -2.440259000 |
| 1                                              | -0.011550000 | 1.240473000  | 1.964508000  | 1                                              | -2.052351000 | 0.103426000  | 1.359332000  |
| 1                                              | 0.029665000  | 1.600829000  | 2.627748000  | 1                                              | -2.689299000 | 0.137951000  | 1.763247000  |
| 1                                              | 1.418274000  | -1.281719000 | 2.432673000  | 1                                              | -0.019937000 | 1.870983000  | 2.590139000  |
| 1                                              | 1.087387000  | -0.986810000 | 1.819983000  | 1                                              | -0.016834000 | 1.420154000  | 1.983430000  |
| 1                                              | -0.054788000 | -3.256693000 | 0.272012000  | 1                                              | 2.650063000  | 0.118810000  | 1.803675000  |
| 1                                              | -0.134857000 | -2.516388000 | 0.149746000  | 1                                              | 2.017293000  | 0.087988000  | 1.392932000  |

|                                                |              |              |              |                                                |              |              |              |
|------------------------------------------------|--------------|--------------|--------------|------------------------------------------------|--------------|--------------|--------------|
| 1                                              | 2.250309000  | -1.438552000 | -0.500755000 | 1                                              | 1.394563000  | 2.207910000  | -0.103613000 |
| 1                                              | 2.911483000  | -1.794479000 | -0.442095000 | 1                                              | 1.800479000  | 2.837943000  | -0.025504000 |
| 1                                              | -1.905365000 | -1.043258000 | 2.241125000  | 1                                              | -0.032320000 | -1.483615000 | 2.829179000  |
| 1                                              | -1.410018000 | -0.823701000 | 1.713775000  | 1                                              | -0.026567000 | -1.126831000 | 2.162870000  |
| 1                                              | -2.101826000 | 1.332619000  | 0.421175000  | 1                                              | -1.392305000 | -2.204160000 | 0.170007000  |
| 1                                              | -2.717089000 | 1.671095000  | 0.695492000  | 1                                              | -1.794798000 | -2.824647000 | 0.314189000  |
| 1                                              | 0.335692000  | 3.456650000  | -0.168039000 | 1                                              | -3.396359000 | -0.099994000 | -1.386965000 |
| 1                                              | 0.227290000  | 2.718202000  | -0.267625000 | 1                                              | -2.664306000 | -0.081371000 | -1.211633000 |
| 1                                              | 2.810874000  | 1.354425000  | 0.847528000  | 1                                              | -1.775342000 | 2.851000000  | -0.067627000 |
| 1                                              | 2.191936000  | 1.050229000  | 0.543030000  | 1                                              | -1.374090000 | 2.216905000  | -0.137331000 |
| 1                                              | -3.074432000 | -1.414475000 | -0.788143000 | 1                                              | 2.692113000  | -0.097258000 | -1.164986000 |
| 1                                              | -2.398460000 | -1.092055000 | -0.701894000 | 1                                              | 3.426092000  | -0.120880000 | -1.331229000 |
|                                                |              |              |              | 1                                              | 1.758043000  | -2.836185000 | 0.342574000  |
|                                                |              |              |              | 1                                              | 1.367338000  | -2.210910000 | 0.186726000  |
| <b>C<sub>2</sub>H<sub>23</sub><sup>-</sup></b> |              |              |              | <b>C<sub>2</sub>H<sub>25</sub><sup>-</sup></b> |              |              |              |
| SCF Energy = -89.66010 a. u.                   |              |              |              | SCF Energy = --90.83568 a. u.                  |              |              |              |
| 6                                              | -0.000228000 | -0.003693000 | -0.010803000 | 6                                              | -0.109777000 | 0.057728000  | -0.001293000 |
| 6                                              | 0.003066000  | 0.026081000  | -1.252457000 | 6                                              | 0.508922000  | -0.063345000 | -1.072251000 |
| 1                                              | 0.005171000  | 0.051635000  | -2.323628000 | 1                                              | 1.029520000  | -0.167101000 | -2.003260000 |
| 1                                              | 1.713964000  | 1.328012000  | 1.289734000  | 1                                              | -0.519984000 | 2.161518000  | 1.415503000  |
| 1                                              | 2.240978000  | 1.736008000  | 1.643627000  | 1                                              | -0.620846000 | 2.825276000  | 1.759340000  |
| 1                                              | -0.002628000 | -0.046900000 | 3.322784000  | 1                                              | -1.524342000 | -0.004749000 | 3.038259000  |
| 1                                              | -0.002486000 | -0.037338000 | 2.567038000  | 1                                              | -1.192419000 | 0.036598000  | 2.361171000  |
| 1                                              | -2.849991000 | -0.133721000 | 1.616889000  | 1                                              | -2.630439000 | -1.956376000 | 0.729128000  |
| 1                                              | -2.179900000 | -0.104379000 | 1.271041000  | 1                                              | -2.098543000 | -1.446387000 | 0.570339000  |
| 1                                              | -0.596689000 | -2.117966000 | 1.248917000  | 1                                              | 0.078712000  | -1.917212000 | 1.624467000  |
| 1                                              | -0.779212000 | -2.767922000 | 1.586153000  | 1                                              | 0.113737000  | -2.462789000 | 2.142858000  |
| 1                                              | -0.986598000 | 2.651122000  | 1.650572000  | 1                                              | -3.201598000 | 1.129273000  | 0.548537000  |
| 1                                              | -0.754876000 | 2.026727000  | 1.295728000  | 1                                              | -2.471621000 | 0.972115000  | 0.442517000  |
| 1                                              | 0.729306000  | 2.588309000  | -0.931135000 | 1                                              | -1.036279000 | 2.272557000  | -1.350128000 |
| 1                                              | 0.932672000  | 3.299254000  | -1.074055000 | 1                                              | -1.346485000 | 2.893665000  | -1.640709000 |
| 1                                              | 3.408625000  | 0.133419000  | -1.116962000 | 1                                              | 1.855408000  | 3.028777000  | -0.065930000 |
| 1                                              | 2.671042000  | 0.106850000  | -0.966872000 | 1                                              | 1.510919000  | 2.363843000  | -0.136513000 |
| 1                                              | 2.367155000  | -1.609934000 | 1.602998000  | 1                                              | 2.061244000  | 0.330716000  | 2.423316000  |
| 1                                              | 1.810433000  | -1.233176000 | 1.260072000  | 1                                              | 1.531381000  | 0.300414000  | 1.886794000  |
| 1                                              | 1.172006000  | -3.181375000 | -1.162221000 | 1                                              | 2.627312000  | -2.440357000 | 0.245732000  |
| 1                                              | 0.917419000  | -2.490319000 | -1.004342000 | 1                                              | 2.105850000  | -1.922134000 | 0.088863000  |
| 1                                              | -2.094731000 | -1.637757000 | -0.994306000 | 1                                              | 3.097406000  | 0.398808000  | -0.424551000 |
| 1                                              | -2.675162000 | -2.091037000 | -1.152086000 | 1                                              | 3.833578000  | 0.504208000  | -0.526059000 |
| 1                                              | -2.839615000 | 1.902057000  | -1.098856000 | 1                                              | -0.370578000 | -2.611994000 | -1.081772000 |
| 1                                              | -2.223912000 | 1.494103000  | -0.951526000 | 1                                              | -0.486234000 | -3.343754000 | -1.213686000 |
|                                                |              |              |              | 1                                              | -2.637550000 | -0.533259000 | -2.449500000 |
|                                                |              |              |              | 1                                              | -2.103018000 | -0.377954000 | -1.943449000 |
| <b>C<sub>2</sub>H<sub>27</sub><sup>-</sup></b> |              |              |              | <b>C<sub>2</sub>H<sub>29</sub><sup>-</sup></b> |              |              |              |
| SCF Energy = -92.01063 a. u.                   |              |              |              | SCF Energy = -93.18534 a. u.                   |              |              |              |
| 6                                              | 0.132153000  | -0.182351000 | 0.042379000  | 6                                              | -0.221708863 | -0.045819870 | 0.121105918  |
| 6                                              | -0.443481000 | 0.536095000  | -0.792941000 | 6                                              | 0.598352887  | 0.239672843  | -0.769039008 |
| 1                                              | -0.931294000 | 1.154839000  | -1.519263000 | 1                                              | 1.293195953  | 0.483626201  | -1.547731268 |
| 1                                              | 0.009673000  | -2.139488000 | 1.780932000  | 1                                              | -2.340372110 | 0.292314866  | 1.619706253  |
| 1                                              | -0.019390000 | -2.681631000 | 2.304104000  | 1                                              | -2.886476152 | 0.468210738  | 2.109198912  |
| 1                                              | 2.407927000  | -0.667205000 | 2.448324000  | 1                                              | -0.457024989 | -0.917167362 | 3.401873096  |
| 1                                              | 1.876924000  | -0.620667000 | 1.914273000  |                                                |              |              |              |

|                                                |              |              |              |                                                |              |              |              |
|------------------------------------------------|--------------|--------------|--------------|------------------------------------------------|--------------|--------------|--------------|
| 1                                              | 3.386238000  | 0.163532000  | -0.493029000 | 1                                              | -0.391844111 | -0.621066232 | 2.712578983  |
| 1                                              | 2.650601000  | 0.055036000  | -0.371674000 | 1                                              | 1.353891525  | -2.760965892 | 1.228097097  |
| 1                                              | 1.581590000  | 1.697415000  | 1.176157000  | 1                                              | 1.027079064  | -2.145400986 | 0.941338062  |
| 1                                              | 1.920393000  | 2.293301000  | 1.486627000  | 1                                              | 1.724103928  | 0.324348082  | 1.975544086  |
| 1                                              | 2.256362000  | -2.750071000 | -0.033721000 | 1                                              | 2.254702018  | 0.362087945  | 2.506774013  |
| 1                                              | 1.735460000  | -2.205947000 | 0.000883000  | 1                                              | -1.936481809 | -2.631881569 | 1.404531142  |
| 1                                              | -0.668489000 | -2.473812000 | -0.826288000 | 1                                              | -1.597145839 | -2.018330183 | 1.127245967  |
| 1                                              | -0.978498000 | -3.145691000 | -0.968407000 | 1                                              | -2.638248101 | -0.687148300 | -0.600157910 |
| 1                                              | -2.734798000 | -1.486406000 | 1.282528000  | 1                                              | -3.310910173 | -0.812722061 | -0.914408232 |
| 1                                              | -2.113612000 | -1.182663000 | 0.985199000  | 1                                              | -2.650617619 | 2.223266773  | -0.555312255 |
| 1                                              | -0.830176000 | 0.852555000  | 2.994142000  | 1                                              | -2.130105118 | 1.711955077  | -0.373200138 |
| 1                                              | -0.545349000 | 0.560980000  | 2.359301000  | 1                                              | -0.315658462 | 2.560780256  | 2.120003124  |
| 1                                              | -0.707695000 | 3.628172000  | 0.607725000  | 1                                              | -0.312006081 | 2.010939164  | 1.604286028  |
| 1                                              | -0.579766000 | 2.896929000  | 0.494199000  | 1                                              | 2.743443775  | 2.688801462  | 0.249216025  |
| 1                                              | -2.677680000 | 1.271785000  | 0.498747000  | 1                                              | 2.212364134  | 2.159361211  | 0.228148950  |
| 1                                              | -3.344405000 | 1.596825000  | 0.616034000  | 1                                              | 0.033484749  | 2.810277274  | -1.210440039 |
| 1                                              | -3.307254000 | -0.885461000 | -1.872591000 | 1                                              | -0.054148062 | 3.542277050  | -1.353414207 |
| 1                                              | -2.643263000 | -0.771628000 | -1.541146000 | 1                                              | -1.575649072 | 0.425003945  | -3.323115117 |
| 1                                              | 1.532335000  | 2.127481000  | -1.513257000 | 1                                              | -1.243618924 | 0.340890692  | -2.653342352 |
| 1                                              | 1.862058000  | 2.729067000  | -1.820434000 | 1                                              | 3.092862158  | -0.550314705 | -0.009544241 |
| 1                                              | 1.528151000  | -1.213038000 | -3.050459000 | 1                                              | 3.828163471  | -0.662579658 | -0.105604199 |
| 1                                              | 1.201924000  | -0.926673000 | -2.435535000 | 1                                              | -0.962234742 | -2.911926403 | -1.601606274 |
|                                                |              |              |              | 1                                              | -0.825041836 | -2.251109434 | -1.268796119 |
|                                                |              |              |              | 1                                              | 2.119289264  | -2.518829200 | -2.123820080 |
|                                                |              |              |              | 1                                              | 1.685139020  | -2.077817114 | -1.700451293 |
| <b>C<sub>2</sub>H<sub>31</sub><sup>-</sup></b> |              |              |              | <b>C<sub>2</sub>H<sub>33</sub><sup>-</sup></b> |              |              |              |
| SCF Energy = -94.35982 a. u.                   |              |              |              | SCF Energy = -95.53349 a. u.                   |              |              |              |
| 6                                              | 0.001446000  | -0.003896000 | 0.290822000  | 6                                              | -0.428137000 | -0.156095000 | 0.020369000  |
| 6                                              | -0.004693000 | 0.009998000  | -0.953306000 | 6                                              | 0.684069000  | 0.394607000  | -0.068682000 |
| 1                                              | -0.009915000 | 0.022312000  | -2.025170000 | 1                                              | 1.637686000  | 0.877126000  | -0.147718000 |
| 1                                              | 1.140832000  | -0.812115000 | 2.559451000  | 1                                              | -2.554290000 | -0.636915000 | 1.550926000  |
| 1                                              | 1.489650000  | -1.058537000 | 3.179850000  | 1                                              | -3.137498000 | -0.750278000 | 2.013680000  |
| 1                                              | -1.611307000 | -0.792328000 | 3.195709000  | 1                                              | -2.712907000 | -2.680217000 | -0.398562000 |
| 1                                              | -1.232186000 | -0.606475000 | 2.571947000  | 1                                              | -2.235375000 | -2.108179000 | -0.289232000 |
| 1                                              | -2.594308000 | 1.822620000  | 1.174981000  | 1                                              | -1.296594000 | -0.906431000 | -3.075249000 |
| 1                                              | -1.997722000 | 1.404350000  | 0.981286000  | 1                                              | -1.103899000 | -0.734694000 | -2.367067000 |
| 1                                              | -2.401307000 | -1.115307000 | 0.534835000  | 1                                              | -0.005836000 | -2.564017000 | -0.974796000 |
| 1                                              | -3.080541000 | -1.429886000 | 0.607099000  | 1                                              | 0.145932000  | -3.243357000 | -1.259453000 |
| 1                                              | 0.174830000  | 1.763568000  | 3.206455000  | 1                                              | -3.701061000 | 0.224987000  | -0.892556000 |
| 1                                              | 0.131683000  | 1.347046000  | 2.580377000  | 1                                              | -2.988162000 | 0.112931000  | -0.677909000 |
| 1                                              | 2.234859000  | 1.015611000  | 0.952942000  | 1                                              | -1.773614000 | 1.831693000  | 0.952423000  |
| 1                                              | 2.900411000  | 1.319940000  | 1.133859000  | 1                                              | -2.171826000 | 2.409578000  | 1.226521000  |
| 1                                              | 2.774585000  | -1.970699000 | 0.574648000  | 1                                              | -0.650177000 | 0.338426000  | 3.394704000  |
| 1                                              | 2.162895000  | -1.537995000 | 0.510541000  | 1                                              | -0.594652000 | 0.228017000  | 2.652951000  |
| 1                                              | -0.288569000 | -3.182398000 | 1.108297000  | 1                                              | -0.367465000 | -2.707933000 | 2.070780000  |
| 1                                              | -0.219309000 | -2.452395000 | 0.933132000  | 1                                              | -0.411652000 | -2.127779000 | 1.590702000  |
| 1                                              | -1.859937000 | -2.663373000 | -1.970085000 | 1                                              | 2.520302000  | -2.481284000 | 0.488531000  |
| 1                                              | -1.500601000 | -2.141409000 | -1.567630000 | 1                                              | 1.961315000  | -1.991859000 | 0.376849000  |
| 1                                              | 1.064429000  | -2.380623000 | -1.578611000 | 1                                              | 1.840779000  | -0.295985000 | 2.266092000  |
| 1                                              | 1.314752000  | -2.961919000 | -1.982312000 | 1                                              | 2.362596000  | -0.346739000 | 2.803584000  |
| 1                                              | 3.244274000  | -0.234678000 | -1.963784000 | 1                                              | 1.055511000  | 2.740388000  | 2.379164000  |
| 1                                              | 2.610849000  | -0.201997000 | -1.562347000 | 1                                              | 0.793149000  | 2.191966000  | 1.939334000  |
| 1                                              | -2.624267000 | 0.279071000  | -1.532951000 | 1                                              | 1.739919000  | -1.071219000 | -2.043973000 |
| 1                                              | -3.257578000 | 0.368842000  | -1.925822000 | 1                                              | 2.230031000  | -1.306962000 | -2.562173000 |

|                                                |              |              |              |                                                |              |              |              |
|------------------------------------------------|--------------|--------------|--------------|------------------------------------------------|--------------|--------------|--------------|
| 1                                              | 0.318703000  | 3.377351000  | 0.634129000  | 1                                              | -1.767030000 | 2.227042000  | -2.086742000 |
| 1                                              | 0.247595000  | 2.633042000  | 0.553860000  | 1                                              | -1.453555000 | 1.716589000  | -1.632480000 |
| 1                                              | 1.914717000  | 2.655748000  | -1.939582000 | 1                                              | 0.491347000  | 3.772127000  | -0.594044000 |
| 1                                              | 1.533881000  | 2.145312000  | -1.542344000 | 1                                              | 0.329500000  | 3.046110000  | -0.497595000 |
| 1                                              | -1.421999000 | 2.962495000  | -1.910213000 | 1                                              | 4.511319000  | 0.065939000  | -0.082233000 |
| 1                                              | -1.139916000 | 2.388216000  | -1.517643000 | 1                                              | 3.818074000  | -0.205869000 | -0.024169000 |
| <b>C<sub>2</sub>H<sub>35</sub><sup>-</sup></b> |              |              |              | <b>C<sub>2</sub>H<sub>37</sub><sup>-</sup></b> |              |              |              |
| SCF Energy = -96.70795 a. u.                   |              |              |              | SCF Energy = -97.88197 a. u.                   |              |              |              |
| 6                                              | -0.606487000 | 0.010053000  | -0.082020000 | 6                                              | -0.735153000 | -0.000322000 | -0.001063000 |
| 6                                              | 0.587572000  | -0.009998000 | 0.267663000  | 6                                              | 0.509287000  | 0.000062000  | -0.000631000 |
| 1                                              | 1.613326000  | -0.019790000 | 0.578850000  | 1                                              | 1.581125000  | 0.000106000  | -0.000558000 |
| 1                                              | -3.058547000 | -0.710391000 | 0.730457000  | 1                                              | -3.052230000 | -0.642472000 | 1.210437000  |
| 1                                              | -3.726573000 | -0.855969000 | 1.045213000  | 1                                              | -3.682059000 | -0.839219000 | 1.572601000  |
| 1                                              | -3.189500000 | -0.933165000 | -2.146831000 | 1                                              | -3.678738000 | -0.947692000 | -1.517026000 |
| 1                                              | -2.665031000 | -0.725500000 | -1.648361000 | 1                                              | -3.049718000 | -0.730591000 | -1.165218000 |
| 1                                              | -1.160170000 | 1.560660000  | -2.919287000 | 1                                              | -1.748086000 | 1.465013000  | -2.771139000 |
| 1                                              | -1.070136000 | 1.217061000  | -2.253983000 | 1                                              | -1.534748000 | 1.129436000  | -2.130732000 |
| 1                                              | -0.425878000 | -1.197580000 | -2.433613000 | 1                                              | -1.019984000 | -1.356386000 | -2.271130000 |
| 1                                              | -0.349332000 | -1.529642000 | -3.103903000 | 1                                              | -1.101923000 | -1.741958000 | -2.911367000 |
| 1                                              | -3.575680000 | 1.718595000  | -0.586311000 | 1                                              | -3.679662000 | 1.783237000  | -0.063849000 |
| 1                                              | -2.914596000 | 1.371030000  | -0.494342000 | 1                                              | -3.049391000 | 1.371888000  | -0.052578000 |
| 1                                              | -1.612491000 | 1.184959000  | 1.975599000  | 1                                              | -1.541926000 | 1.278195000  | 2.040503000  |
| 1                                              | -1.913333000 | 1.499270000  | 2.590613000  | 1                                              | -1.757885000 | 1.664661000  | 2.650614000  |
| 1                                              | -1.412338000 | -1.909483000 | 2.698356000  | 1                                              | -1.106577000 | -1.650743000 | 2.962751000  |
| 1                                              | -1.213857000 | -1.415330000 | 2.168375000  | 1                                              | -1.024190000 | -1.287570000 | 2.309624000  |
| 1                                              | -1.437808000 | -3.158551000 | -0.347771000 | 1                                              | -1.750096000 | -3.131532000 | 0.117253000  |
| 1                                              | -1.305654000 | -2.423190000 | -0.246848000 | 1                                              | -1.537947000 | -2.408788000 | 0.087557000  |
| 1                                              | 1.651630000  | -2.923352000 | -1.231600000 | 1                                              | 1.140484000  | -3.098916000 | -1.314060000 |
| 1                                              | 1.166898000  | -2.395822000 | -1.007479000 | 1                                              | 0.811238000  | -2.474731000 | -1.056683000 |
| 1                                              | 1.043285000  | -2.362210000 | 1.550534000  | 1                                              | 1.231601000  | -2.101603000 | 1.477724000  |
| 1                                              | 1.365200000  | -2.964093000 | 1.861861000  | 1                                              | 1.690990000  | -2.591285000 | 1.814089000  |
| 1                                              | 0.992742000  | 0.146279000  | 3.651568000  | 1                                              | 1.132329000  | 0.412592000  | 3.341238000  |
| 1                                              | 0.667530000  | 0.073405000  | 2.979668000  | 1                                              | 0.805681000  | 0.324372000  | 2.670581000  |
| 1                                              | 1.848168000  | -0.060051000 | -2.092216000 | 1                                              | 1.236355000  | -0.227532000 | -2.560019000 |
| 1                                              | 2.385454000  | -0.059587000 | -2.617083000 | 1                                              | 1.696619000  | -0.272431000 | -3.151695000 |
| 1                                              | -1.084015000 | 3.404735000  | 0.092180000  | 1                                              | -1.106125000 | 3.391440000  | -0.053190000 |
| 1                                              | -0.965623000 | 2.669038000  | -0.004995000 | 1                                              | -1.022657000 | 2.644356000  | -0.040618000 |
| 1                                              | 1.396159000  | 2.925324000  | 1.820550000  | 1                                              | 1.691550000  | 2.867543000  | 1.340193000  |
| 1                                              | 1.068817000  | 2.329669000  | 1.502395000  | 1                                              | 1.232335000  | 2.332211000  | 1.082348000  |
| 1                                              | 4.223633000  | -1.463302000 | -0.163421000 | 1                                              | 3.974395000  | -1.654635000 | -0.757494000 |
| 1                                              | 3.490364000  | -1.568769000 | -0.071656000 | 1                                              | 3.227709000  | -1.663384000 | -0.763442000 |
| 1                                              | 4.126362000  | 2.005809000  | -0.119928000 | 1                                              | 3.974095000  | 1.485855000  | -1.045594000 |
| 1                                              | 3.586543000  | 1.491466000  | -0.137902000 | 1                                              | 3.227452000  | 1.497772000  | -1.052196000 |
| 1                                              | 1.446006000  | 2.841960000  | -1.517713000 | 1                                              | 1.141370000  | 2.691948000  | -2.019605000 |
| 1                                              | 1.121931000  | 2.236184000  | -1.214834000 | 1                                              | 0.812804000  | 2.154280000  | -1.610721000 |
| <b>C<sub>2</sub>H<sub>39</sub><sup>-</sup></b> |              |              |              | <b>C<sub>2</sub>H<sub>41</sub><sup>-</sup></b> |              |              |              |
| SCF Energy = -99.05655 a. u.                   |              |              |              | SCF Energy = -100.22856 a. u.                  |              |              |              |
| 6                                              | -0.731808000 | -0.000871000 | 0.022185000  | 6                                              | 0.803276000  | -0.010064000 | -0.025685000 |

|                                                |              |              |              |                                                |              |              |              |
|------------------------------------------------|--------------|--------------|--------------|------------------------------------------------|--------------|--------------|--------------|
| 6                                              | 0.513002000  | 0.011742000  | 0.030998000  | 6                                              | -0.440171000 | 0.037562000  | 0.022653000  |
| 1                                              | 1.585019000  | 0.014240000  | 0.023727000  | 1                                              | -1.511754000 | 0.066830000  | 0.070485000  |
| 1                                              | -3.133592000 | 1.335511000  | -0.128448000 | 1                                              | 3.301162000  | 0.889041000  | 0.924992000  |
| 1                                              | -3.798103000 | 1.680225000  | -0.199843000 | 1                                              | 3.924533000  | 1.182606000  | 1.224104000  |
| 1                                              | -3.746980000 | -1.048259000 | -1.561983000 | 1                                              | 3.960546000  | -1.662536000 | 0.276892000  |
| 1                                              | -3.128448000 | -0.772625000 | -1.236544000 | 1                                              | 3.295201000  | -1.323944000 | 0.192572000  |
| 1                                              | -0.961140000 | -1.653316000 | -2.898221000 | 1                                              | 1.276059000  | -3.195022000 | 0.833437000  |
| 1                                              | -0.886351000 | -1.309235000 | -2.232753000 | 1                                              | 1.162752000  | -2.462526000 | 0.699771000  |
| 1                                              | -1.793255000 | -2.476299000 | -0.196894000 | 1                                              | 1.912246000  | -1.962823000 | -1.605629000 |
| 1                                              | -2.111440000 | -3.152845000 | -0.271456000 | 1                                              | 2.310727000  | -2.420176000 | -2.048002000 |
| 1                                              | -2.140105000 | 1.315496000  | -2.789036000 | 1                                              | 2.440747000  | -0.931408000 | 2.873975000  |
| 1                                              | -1.844773000 | 1.012459000  | -2.167486000 | 1                                              | 2.110530000  | -0.786813000 | 2.214602000  |
| 1                                              | -0.971758000 | 2.551569000  | -0.426301000 | 1                                              | 1.121459000  | 1.486073000  | 2.140560000  |
| 1                                              | -1.076935000 | 3.287360000  | -0.547160000 | 1                                              | 1.289771000  | 1.989673000  | 2.673415000  |
| 1                                              | -2.144873000 | 1.913933000  | 2.400291000  | 1                                              | 2.389296000  | 3.074175000  | -0.457702000 |
| 1                                              | -1.901193000 | 1.420219000  | 1.887488000  | 1                                              | 2.062188000  | 2.403595000  | -0.372946000 |
| 1                                              | -3.526324000 | -0.980663000 | 1.566963000  | 1                                              | 3.390784000  | 0.553738000  | -2.037120000 |
| 1                                              | -2.907430000 | -0.720035000 | 1.222883000  | 1                                              | 2.860798000  | 0.380566000  | -1.528638000 |
| 1                                              | -0.833804000 | -2.453861000 | 2.455955000  | 1                                              | 0.654381000  | -0.357421000 | -3.516257000 |
| 1                                              | -0.817266000 | -1.922984000 | 1.924158000  | 1                                              | 0.749404000  | -0.248202000 | -2.779358000 |
| 1                                              | 0.077433000  | 0.185251000  | 2.819588000  | 1                                              | 0.204999000  | 1.961376000  | -1.932801000 |
| 1                                              | 0.198818000  | 0.288203000  | 3.553739000  | 1                                              | 0.168375000  | 2.492594000  | -2.463567000 |
| 1                                              | 0.680805000  | 2.869392000  | 2.110159000  | 1                                              | -0.424836000 | 3.537256000  | 0.577027000  |
| 1                                              | 0.460485000  | 2.340892000  | 1.625268000  | 1                                              | -0.117426000 | 2.860985000  | 0.472247000  |
| 1                                              | 0.699041000  | -2.663654000 | -0.174115000 | 1                                              | -0.547422000 | -2.143522000 | -1.598092000 |
| 1                                              | 1.027082000  | -3.335927000 | -0.248597000 | 1                                              | -0.830776000 | -2.754894000 | -1.931756000 |
| 1                                              | 0.927231000  | 1.425208000  | -3.068965000 | 1                                              | -0.524961000 | -1.168995000 | 3.240393000  |
| 1                                              | 0.623864000  | 1.130766000  | -2.447964000 | 1                                              | -0.378677000 | -0.851885000 | 2.574668000  |
| 1                                              | 2.220700000  | -1.869384000 | 2.381393000  | 1                                              | -1.950427000 | 1.806306000  | 2.647550000  |
| 1                                              | 1.619871000  | -1.568983000 | 2.049240000  | 1                                              | -1.597393000 | 1.513540000  | 2.055152000  |
| 1                                              | 4.076519000  | -1.674194000 | -0.058614000 | 1                                              | -2.274311000 | 0.195981000  | -2.913032000 |
| 1                                              | 3.345966000  | -1.779780000 | 0.052352000  | 1                                              | -1.735329000 | 0.182195000  | -2.392306000 |
| 1                                              | 2.164538000  | -1.497303000 | -2.669305000 | 1                                              | -3.927577000 | -1.921462000 | -1.080236000 |
| 1                                              | 1.649924000  | -1.284231000 | -2.168661000 | 1                                              | -3.195348000 | -2.018789000 | -0.972710000 |
| 1                                              | 2.142975000  | 3.040902000  | -0.573275000 | 1                                              | -1.761952000 | -3.031660000 | 1.020530000  |
| 1                                              | 1.611668000  | 2.514235000  | -0.538839000 | 1                                              | -1.256690000 | -2.514450000 | 0.822586000  |
| 1                                              | 4.185883000  | 0.895474000  | -1.715609000 | 1                                              | -3.715384000 | -0.898594000 | 2.176241000  |
| 1                                              | 3.456634000  | 0.787705000  | -1.599746000 | 1                                              | -2.985338000 | -1.003235000 | 2.061196000  |
| 1                                              | 2.774744000  | 0.991093000  | 1.712118000  | 1                                              | -4.261613000 | 0.844820000  | -0.217821000 |
| 1                                              | 3.507409000  | 1.098224000  | 1.815392000  | 1                                              | -4.927670000 | 0.937042000  | 0.105301000  |
|                                                |              |              |              | 1                                              | -2.750856000 | 2.731797000  | -1.062908000 |
|                                                |              |              |              | 1                                              | -2.088854000 | 2.403179000  | -0.948621000 |
| <b>C<sub>2</sub>H<sub>43</sub><sup>-</sup></b> |              |              |              | <b>C<sub>2</sub>H<sub>45</sub><sup>-</sup></b> |              |              |              |
| SCF Energy = -101.40226 a. u.                  |              |              |              | SCF Energy = -102.57327 a. u.                  |              |              |              |
| 6                                              | -0.877746303 | -0.010186133 | -0.042369106 | 6                                              | -1.015554000 | -0.025719000 | -0.007014000 |
| 6                                              | 0.365233904  | 0.011136006  | 0.031706184  | 6                                              | 0.226672000  | 0.010122000  | 0.078649000  |
| 1                                              | 1.436014013  | 0.036675688  | 0.101342735  | 1                                              | 1.298539000  | 0.040601000  | 0.140401000  |
| 1                                              | -3.239921045 | -1.594566100 | -0.006167032 | 1                                              | -3.622417000 | 0.843026000  | 0.780700000  |
| 1                                              | -3.780903180 | -2.115060080 | -0.000902247 | 1                                              | -4.299459000 | 1.082243000  | 1.000428000  |
| 1                                              | -4.288419088 | 0.733891055  | 0.821405860  | 1                                              | -4.166264000 | 0.093710000  | -1.815129000 |
| 1                                              | -3.610441430 | 0.625137193  | 0.517380830  | 1                                              | -3.525552000 | 0.068084000  | -1.424747000 |
| 1                                              | -1.900970311 | 2.156454970  | 2.222290970  | 1                                              | -1.320173000 | 0.654648000  | -3.268584000 |
| 1                                              | -1.694900223 | 1.651385978  | 1.702313997  | 1                                              | -1.255767000 | 0.501704000  | -2.533982000 |
| 1                                              | -2.409369944 | 2.275400257  | -0.631235961 | 1                                              | -2.202708000 | -1.762573000 | -1.923440000 |



|                                               |              |              |              |                                               |              |              |              |
|-----------------------------------------------|--------------|--------------|--------------|-----------------------------------------------|--------------|--------------|--------------|
| 1                                             | -2.922956044 | 2.820335346  | -0.677987183 | 1                                             | -2.464204000 | -2.223788000 | -2.454145000 |
| 1                                             | -2.691381201 | -0.996906436 | 2.707018388  | 1                                             | -2.783111000 | 2.706188000  | -1.158846000 |
| 1                                             | -2.364229008 | -0.723242951 | 2.087878361  | 1                                             | -2.436027000 | 2.090843000  | -0.902253000 |
| 1                                             | -1.181843301 | -2.510305213 | 0.909238170  | 1                                             | -1.651222000 | 2.088000000  | 1.411256000  |
| 1                                             | -1.107227192 | -3.246145228 | 1.043312106  | 1                                             | -1.820402000 | 2.680948000  | 1.842489000  |
| 1                                             | -1.708209031 | -2.704693184 | -2.046962376 | 1                                             | -2.519827000 | -0.140369000 | 3.089156000  |
| 1                                             | -1.521770890 | -2.177868127 | -1.545339387 | 1                                             | -2.221816000 | -0.119998000 | 2.399682000  |
| 1                                             | -3.282201249 | 0.028214673  | -2.337552125 | 1                                             | -3.630698000 | -1.994802000 | 0.660749000  |
| 1                                             | -2.752324428 | 0.018436006  | -1.800417108 | 1                                             | -3.066377000 | -1.521994000 | 0.495495000  |
| 1                                             | -0.921311349 | 2.123556020  | -2.834629482 | 1                                             | -1.072057000 | -3.577309000 | -0.192647000 |
| 1                                             | -0.909270979 | 1.601394074  | -2.295511109 | 1                                             | -1.055891000 | -2.827853000 | -0.156243000 |
| 1                                             | -0.037854165 | -0.615445312 | -2.695688174 | 1                                             | -0.603990000 | -1.878329000 | 2.028282000  |
| 1                                             | 0.084294232  | -0.731689149 | -3.428251524 | 1                                             | -0.560229000 | -2.392548000 | 2.575311000  |
| 1                                             | 1.143654166  | -3.200102045 | -0.900534263 | 1                                             | 0.358116000  | 0.925015000  | 3.366334000  |
| 1                                             | 0.802840205  | -2.543470339 | -0.770086250 | 1                                             | 0.127016000  | 0.727604000  | 2.678728000  |
| 1                                             | -0.031916267 | 2.734784319  | -0.262224261 | 1                                             | 0.275360000  | -1.692818000 | -2.010267000 |
| 1                                             | 0.085246221  | 3.472687067  | -0.176164165 | 1                                             | 0.516098000  | -2.139479000 | -2.565631000 |
| 1                                             | 0.186017974  | -0.242030328 | 3.497953164  | 1                                             | 0.104769000  | 3.043516000  | -1.651068000 |
| 1                                             | -0.113429143 | -0.155404012 | 2.814720246  | 1                                             | -0.061606000 | 2.403495000  | -1.294020000 |
| 1                                             | 1.564358017  | -2.508785416 | 2.146329163  | 1                                             | 1.086960000  | 3.177526000  | 1.316710000  |
| 1                                             | 1.127169237  | -2.073613330 | 1.720584370  | 1                                             | 0.702754000  | 2.580773000  | 1.074300000  |
| 1                                             | 2.030893909  | 1.832137051  | -2.398359353 | 1                                             | 1.826469000  | -3.026042000 | 0.342094000  |
| 1                                             | 1.572824324  | 1.418007169  | -1.973307253 | 1                                             | 1.287829000  | -2.506362000 | 0.292450000  |
| 1                                             | 3.279977117  | 2.862200146  | 0.266417990  | 1                                             | 3.538438000  | -1.903657000 | -2.025739000 |
| 1                                             | 2.550088229  | 2.739837961  | 0.365987981  | 1                                             | 2.820079000  | -1.742757000 | -1.899758000 |
| 1                                             | 1.152859205  | 2.439364240  | 2.459933360  | 1                                             | 1.914867000  | 0.744621000  | -2.834373000 |
| 1                                             | 0.734311222  | 2.004421288  | 2.015373140  | 1                                             | 1.362580000  | 0.609733000  | -2.345004000 |
| 1                                             | 4.077697532  | -2.276523171 | 0.283225189  | 1                                             | 3.563017000  | 1.236607000  | 1.733166000  |
| 1                                             | 3.347969514  | -2.161886974 | 0.389578174  | 1                                             | 2.818423000  | 1.286953000  | 1.764920000  |
| 1                                             | 3.313218444  | 0.055034963  | 2.367013010  | 1                                             | 4.894595000  | 0.760311000  | -1.190396000 |
| 1                                             | 2.580543967  | 0.156389869  | 2.259991145  | 1                                             | 4.159362000  | 0.682637000  | -1.091370000 |
| 1                                             | 4.163035301  | 0.575896192  | -0.695500304 | 1                                             | 3.961728000  | -1.524683000 | 0.864426000  |
| 1                                             | 4.893480354  | 0.473741170  | -0.583887297 | 1                                             | 4.699512000  | -1.635616000 | 0.884337000  |
| 1                                             | 3.042679222  | -1.183807078 | -2.448562399 | 1                                             | 2.372135000  | -1.357466000 | 2.902817000  |
| 1                                             | 2.376750400  | -1.079535876 | -2.126043153 | 1                                             | 1.751891000  | -1.218157000 | 2.509024000  |
|                                               |              |              |              | 1                                             | 2.490910000  | 2.953429000  | -0.860327000 |
|                                               |              |              |              | 1                                             | 3.141644000  | 3.297969000  | -0.985096000 |
| <b>C<sub>4</sub>H<sub>3</sub><sup>-</sup></b> |              |              |              | <b>C<sub>4</sub>H<sub>5</sub><sup>-</sup></b> |              |              |              |
| SCF Energy = -154.088774 a. u.                |              |              |              | SCF Energy = -155.26408 a. u.                 |              |              |              |
| 6                                             | -0.000025000 | 0.000006000  | -0.931320000 | 6                                             | -1.189959000 | -0.000862000 | 0.000026000  |
| 6                                             | 0.000017000  | -0.000677000 | 0.425319000  | 6                                             | 0.166623000  | -0.008683000 | -0.000442000 |
| 6                                             | 0.000010000  | -0.001549000 | 1.680396000  | 6                                             | 1.420769000  | -0.016875000 | -0.000896000 |
| 6                                             | 0.000061000  | 0.000935000  | -2.155997000 | 6                                             | -2.413966000 | 0.006281000  | 0.000408000  |
| 1                                             | -0.000261000 | 0.000807000  | -3.216162000 | 1                                             | -3.474137000 | 0.012059000  | 0.000990000  |
| 1                                             | -0.000328000 | 0.002625000  | 4.172509000  | 1                                             | 3.550121000  | 1.292905000  | 0.000823000  |
| 1                                             | 0.000209000  | 0.004279000  | 4.933263000  | 1                                             | 4.185950000  | 1.705971000  | 0.001313000  |
|                                               |              |              |              | 1                                             | 3.593018000  | -1.250639000 | 0.000817000  |
|                                               |              |              |              | 1                                             | 4.244245000  | -1.639460000 | 0.001478000  |
| <b>C<sub>4</sub>H<sub>7</sub><sup>-</sup></b> |              |              |              | <b>C<sub>4</sub>H<sub>9</sub><sup>-</sup></b> |              |              |              |
| SCF Energy = -156.439914 a. u.                |              |              |              | SCF Energy = -157.615364 a. u.                |              |              |              |
| 6                                             | -1.414836000 | 0.000343000  | 0.000263000  | 6                                             | 1.562432341  | -0.000156107 | -0.000039159 |
| 6                                             | -0.057887000 | -0.003429000 | 0.003673000  | 6                                             | 0.205292726  | -0.000278347 | -0.000528119 |

|                                                |              |              |              |                                                |              |              |              |
|------------------------------------------------|--------------|--------------|--------------|------------------------------------------------|--------------|--------------|--------------|
| 6                                              | 1.195185000  | -0.006080000 | 0.008728000  | 6                                              | -1.047314273 | -0.000292106 | -0.001054121 |
| 6                                              | -2.638336000 | 0.001627000  | -0.002795000 | 6                                              | 2.785556230  | -0.000091018 | 0.000332852  |
| 1                                              | -3.698477000 | 0.003719000  | -0.004365000 | 1                                              | 3.845695113  | 0.000052918  | 0.000923943  |
| 1                                              | 3.226575000  | -0.989391000 | -1.090686000 | 1                                              | -2.456779992 | 2.084422305  | 0.000127003  |
| 1                                              | 3.832444000  | -1.289631000 | -1.430664000 | 1                                              | -2.857007859 | 2.724867008  | 0.000628133  |
| 1                                              | 3.215711000  | 1.444377000  | -0.321410000 | 1                                              | -2.459710576 | -2.082960188 | -0.000364074 |
| 1                                              | 3.817631000  | 1.892099000  | -0.422771000 | 1                                              | -2.860510483 | -2.722979962 | 0.002658057  |
| 1                                              | 3.856560000  | -0.575268000 | 1.818022000  | 1                                              | -3.886695238 | 0.001337231  | 1.655836888  |
| 1                                              | 3.244796000  | -0.440665000 | 1.392655000  | 1                                              | -3.234401197 | 0.000895897  | 1.273127964  |
|                                                |              |              |              | 1                                              | -3.889729540 | -0.000572041 | -1.653298954 |
|                                                |              |              |              | 1                                              | -3.236663430 | -0.000157166 | -1.271909269 |
| <b>C<sub>4</sub>H<sub>11</sub><sup>-</sup></b> |              |              |              | <b>C<sub>4</sub>H<sub>13</sub><sup>-</sup></b> |              |              |              |
| SCF Energy = -158.79066 a. u.                  |              |              |              | SCF Energy = -159.966612 a. u.                 |              |              |              |
| 6                                              | -1.659002426 | -0.000133882 | 0.009986633  | 6                                              | -1.772599319 | -0.017424748 | -0.007205807 |
| 6                                              | -0.303466219 | -0.000329677 | -0.057318892 | 6                                              | -0.415290897 | -0.031377036 | -0.013564930 |
| 6                                              | 0.947060056  | -0.000264059 | -0.124804867 | 6                                              | 0.836682148  | -0.038801922 | -0.015548815 |
| 6                                              | -2.880205402 | -0.000024871 | 0.070908693  | 6                                              | -2.994994001 | -0.004399580 | -0.001570069 |
| 1                                              | -3.939094369 | 0.000274114  | 0.124476777  | 1                                              | -4.055248246 | 0.008729308  | 0.004197963  |
| 1                                              | 2.030860042  | -2.089814091 | -1.045947937 | 1                                              | 1.939360533  | 2.209064185  | 0.411324184  |
| 1                                              | 2.346528029  | -2.722231176 | -1.309489320 | 1                                              | 2.259173566  | 2.876131266  | 0.556206035  |
| 1                                              | 2.029053960  | 2.090277122  | -1.045868032 | 1                                              | 2.164128040  | -1.972901374 | 0.959969335  |
| 1                                              | 2.344183245  | 2.723060397  | -1.309196156 | 1                                              | 2.540370418  | -2.554558189 | 1.258121026  |
| 1                                              | 4.215491054  | 0.001727235  | -0.719515426 | 1                                              | 4.155621528  | 0.138510028  | 0.043964046  |
| 1                                              | 3.470380383  | 0.000269880  | -0.592721382 | 1                                              | 3.401678359  | 0.093672840  | 0.032327967  |
| 1                                              | 2.945053957  | -1.682366131 | 1.858012231  | 1                                              | 2.447188126  | 1.406975940  | -2.498273310 |
| 1                                              | 2.494202878  | -1.292740860 | 1.394782109  | 1                                              | 2.062737150  | 1.077268880  | -1.940117256 |
| 1                                              | 2.943802982  | 1.682974156  | 1.858051919  | 1                                              | 2.576077182  | -1.937698916 | -2.062377309 |
| 1                                              | 2.493221255  | 1.293085355  | 1.394785813  | 1                                              | 2.183573187  | -1.495963974 | -1.593719946 |
|                                                |              |              |              | 1                                              | 2.026885391  | 0.303876860  | 2.196962959  |
|                                                |              |              |              | 1                                              | 2.375667175  | 0.398913919  | 2.858754144  |
| <b>C<sub>4</sub>H<sub>15</sub><sup>-</sup></b> |              |              |              | <b>C<sub>4</sub>H<sub>17</sub><sup>-</sup></b> |              |              |              |
| SCF Energy = -161.141927 a. u.                 |              |              |              | SCF Energy = -162.317161 a. u.                 |              |              |              |
| 6                                              | -1.763285270 | -0.154303323 | 0.008412331  | 6                                              | -1.747888858 | -0.284849234 | -0.001161015 |
| 6                                              | -0.406116021 | -0.136694950 | 0.014429076  | 6                                              | -0.390668808 | -0.264075323 | -0.001697071 |
| 6                                              | 0.845542163  | -0.109308969 | 0.016310301  | 6                                              | 0.860272341  | -0.210175974 | -0.001739935 |
| 6                                              | -2.985279365 | -0.165654175 | 0.003419014  | 6                                              | -2.969319380 | -0.289785399 | -0.000532352 |
| 1                                              | -4.045356335 | -0.175821258 | -0.001927793 | 1                                              | -4.029577328 | -0.295358165 | 0.000100015  |
| 1                                              | 2.184319856  | 1.701396932  | 1.185681953  | 1                                              | 2.218063373  | 1.958719953  | 0.003177709  |
| 1                                              | 2.518294731  | 2.297392334  | 1.503843953  | 1                                              | 2.579809999  | 2.619723193  | 0.000784770  |
| 1                                              | 1.971453016  | -2.373374250 | 0.164323294  | 1                                              | 2.057920050  | -2.030996040 | 1.310049719  |
| 1                                              | 2.302290399  | -3.046527928 | 0.236018874  | 1                                              | 2.392883427  | -2.575165410 | 1.709365813  |
| 1                                              | 4.163744399  | -0.371997847 | -0.074629867 | 1                                              | 4.194119173  | -0.313526936 | 0.008281624  |
| 1                                              | 3.418336330  | -0.271620861 | -0.008021798 | 1                                              | 3.440050589  | -0.279198150 | 0.009209801  |
| 1                                              | 2.647691798  | 1.951966064  | -1.827936971 | 1                                              | 2.447253214  | 0.686790047  | -2.747509444 |
| 1                                              | 2.227207027  | 1.498846932  | -1.397037992 | 1                                              | 2.099297477  | 0.469779749  | -2.115209308 |
| 1                                              | 2.274956277  | -1.303133901 | -2.702487044 | 1                                              | 2.403069560  | -2.560719400 | -1.724903515 |
| 1                                              | 1.960683201  | -1.015991213 | -2.080742935 | 1                                              | 2.065727531  | -2.019966399 | -1.322960056 |
| 1                                              | 2.412207393  | -0.764176928 | 2.831525328  | 1                                              | -0.311067850 | 2.686802230  | 1.791794165  |
| 1                                              | 2.074728306  | -0.640292829 | 2.168789033  | 1                                              | -0.142944004 | 2.055705972  | 1.421735752  |
| 1                                              | -0.068761292 | 2.586989876  | -0.080101031 | 1                                              | 2.441303145  | 0.668914968  | 2.752360941  |
| 1                                              | -0.186963085 | 3.322114972  | -0.172718691 | 1                                              | 2.093887169  | 0.456400031  | 2.118239906  |
|                                                |              |              |              | 1                                              | -0.146769956 | 2.066284225  | -1.408912200 |

|                                                |              |              |              |                                                |              |              |              |
|------------------------------------------------|--------------|--------------|--------------|------------------------------------------------|--------------|--------------|--------------|
|                                                |              |              |              | 1                                              | -0.317395222 | 2.699122005  | -1.774823451 |
| <b>C<sub>4</sub>H<sub>19</sub><sup>-</sup></b> |              |              |              | <b>C<sub>4</sub>H<sub>21</sub><sup>-</sup></b> |              |              |              |
| SCF Energy = -163.492047 a. u.                 |              |              |              | SCF Energy = -164.668125 a. u.                 |              |              |              |
| 6                                              | 1.739102000  | 0.106000000  | 0.000063000  | 6                                              | 1.730609000  | -0.000026000 | -0.182649000 |
| 6                                              | 0.381613000  | 0.105126000  | 0.000067000  | 6                                              | 0.373214000  | -0.000076000 | -0.182565000 |
| 6                                              | -0.870545000 | 0.086937000  | 0.000141000  | 6                                              | -0.878591000 | -0.000033000 | -0.148082000 |
| 6                                              | 2.960088000  | 0.100849000  | -0.000104000 | 6                                              | 2.951179000  | -0.000137000 | -0.171478000 |
| 1                                              | 4.020364000  | 0.096614000  | 0.000209000  | 1                                              | 4.011530000  | -0.000113000 | -0.162101000 |
| 1                                              | -2.222381000 | -2.091065000 | 0.001398000  | 1                                              | -2.241050000 | -2.073673000 | 0.513908000  |
| 1                                              | -2.574504000 | -2.756926000 | 0.001653000  | 1                                              | -2.590012000 | -2.710083000 | 0.714239000  |
| 1                                              | -2.110268000 | 1.879048000  | 1.322777000  | 1                                              | -2.240324000 | 2.074118000  | 0.513887000  |
| 1                                              | -2.441080000 | 2.429548000  | 1.716540000  | 1                                              | -2.589709000 | 2.710318000  | 0.714241000  |
| 1                                              | -4.212938000 | 0.148660000  | 0.001175000  | 1                                              | -4.206777000 | 0.000010000  | -0.451445000 |
| 1                                              | -3.458546000 | 0.131764000  | 0.000846000  | 1                                              | -3.456360000 | 0.000344000  | -0.373987000 |
| 1                                              | -2.462298000 | -0.820312000 | -2.746554000 | 1                                              | -2.231133000 | -1.779533000 | -2.572749000 |
| 1                                              | -2.115129000 | -0.601109000 | -2.114875000 | 1                                              | -1.935891000 | -1.357459000 | -2.023330000 |
| 1                                              | -2.440939000 | 2.427902000  | -1.718308000 | 1                                              | -2.230832000 | 1.779599000  | -2.572813000 |
| 1                                              | -2.110268000 | 1.877726000  | -1.323970000 | 1                                              | -1.935646000 | 1.357498000  | -2.023379000 |
| 1                                              | 0.309253000  | -2.829876000 | 1.804609000  | 1                                              | 0.183121000  | -1.869195000 | 2.713501000  |
| 1                                              | 0.136876000  | -2.198895000 | 1.436668000  | 1                                              | 0.038325000  | -1.463799000 | 2.098480000  |
| 1                                              | -2.459330000 | -0.818283000 | 2.749226000  | 1                                              | -2.707492000 | 0.000341000  | 2.628896000  |
| 1                                              | -2.112888000 | -0.599604000 | 2.116952000  | 1                                              | -2.323567000 | 0.000209000  | 1.981093000  |
| 1                                              | 0.134572000  | -2.196742000 | -1.439381000 | 1                                              | 0.193676000  | -2.685419000 | -0.550711000 |
| 1                                              | 0.305700000  | -2.827388000 | -1.808413000 | 1                                              | 0.393466000  | -3.401741000 | -0.649612000 |
| 1                                              | 0.358619000  | 3.543705000  | -0.001434000 | 1                                              | 0.394176000  | 3.401505000  | -0.649985000 |
| 1                                              | 0.193628000  | 2.811769000  | -0.000118000 | 1                                              | 0.194229000  | 2.685234000  | -0.551006000 |
|                                                |              |              |              | 1                                              | 0.183296000  | 1.869490000  | 2.713236000  |
|                                                |              |              |              | 1                                              | 0.038500000  | 1.463978000  | 2.098288000  |
| <b>C<sub>4</sub>H<sub>23</sub><sup>-</sup></b> |              |              |              | <b>C<sub>4</sub>H<sub>25</sub><sup>-</sup></b> |              |              |              |
| SCF Energy = -165.843649 a. u.                 |              |              |              | SCF Energy = -167.018216 a. u.                 |              |              |              |
| 6                                              | -1.711658000 | -0.007684000 | -0.006432000 | 6                                              | -1.673016000 | -0.196657000 | -0.019785000 |
| 6                                              | -0.354184000 | -0.005031000 | -0.004947000 | 6                                              | -0.322396000 | -0.058300000 | -0.006727000 |
| 6                                              | 0.898250000  | -0.000326000 | -0.000387000 | 6                                              | 0.926262000  | 0.045494000  | 0.002902000  |
| 6                                              | -2.932006000 | -0.009191000 | -0.007135000 | 6                                              | -2.886677000 | -0.320190000 | -0.031749000 |
| 1                                              | -3.992424000 | -0.013177000 | -0.000770000 | 1                                              | -3.941722000 | -0.427943000 | -0.037440000 |
| 1                                              | 2.202247000  | -2.135463000 | -0.541148000 | 1                                              | 2.196300000  | 0.519286000  | 2.193906000  |
| 1                                              | 2.542825000  | -2.786457000 | -0.706206000 | 1                                              | 2.531713000  | 0.654421000  | 2.853863000  |
| 1                                              | 2.166463000  | 2.072442000  | -0.804604000 | 1                                              | 2.223816000  | 0.950504000  | -2.029199000 |
| 1                                              | 2.501229000  | 2.700298000  | -1.051004000 | 1                                              | 2.562584000  | 1.217350000  | -2.645940000 |
| 1                                              | 4.246398000  | 0.019756000  | 0.038613000  | 1                                              | 4.261327000  | 0.440048000  | 0.067198000  |
| 1                                              | 3.492292000  | 0.013614000  | 0.026321000  | 1                                              | 3.513063000  | 0.348213000  | 0.054623000  |
| 1                                              | 2.487239000  | -1.539862000 | 2.458908000  | 1                                              | -0.524443000 | 1.706171000  | 2.958612000  |
| 1                                              | 2.163039000  | -1.178449000 | 1.883330000  | 1                                              | -0.290950000 | 1.357915000  | 2.336675000  |
| 1                                              | 2.469206000  | 1.847671000  | 2.249136000  | 1                                              | 1.979226000  | 3.130202000  | 0.303302000  |
| 1                                              | 2.145665000  | 1.417665000  | 1.722465000  | 1                                              | 1.765164000  | 2.411353000  | 0.229351000  |
| 1                                              | -0.268990000 | -2.192275000 | -2.636391000 | 1                                              | 2.835671000  | -2.304330000 | 1.429906000  |
| 1                                              | -0.116206000 | -1.720157000 | -2.073111000 | 1                                              | 2.435095000  | -1.758154000 | 1.101964000  |
| 1                                              | 2.524081000  | -0.142735000 | -2.882572000 | 1                                              | 2.863171000  | -1.981085000 | -1.823009000 |
| 1                                              | 2.186895000  | -0.115539000 | -2.209876000 | 1                                              | 2.467796000  | -1.503272000 | -1.397096000 |
| 1                                              | -0.147273000 | -2.505181000 | 0.979189000  | 1                                              | 0.014310000  | -1.416167000 | 2.334612000  |
| 1                                              | -0.335275000 | -3.185809000 | 1.233754000  | 1                                              | -0.128286000 | -1.788737000 | 2.969672000  |
| 1                                              | -0.374713000 | 1.837285000  | -2.875132000 | 1                                              | -0.064644000 | -1.207570000 | -3.256895000 |

|                                                |              |              |              |                                                |              |              |              |
|------------------------------------------------|--------------|--------------|--------------|------------------------------------------------|--------------|--------------|--------------|
| 1                                              | -0.165897000 | 1.446610000  | -2.269266000 | 1                                              | 0.070932000  | -0.956105000 | -2.563217000 |
| 1                                              | -0.187499000 | 0.168808000  | 2.672991000  | 1                                              | -1.040016000 | 2.685794000  | 0.229021000  |
| 1                                              | -0.396735000 | 0.225346000  | 3.391597000  | 1                                              | -1.399063000 | 3.338902000  | 0.294490000  |
| 1                                              | -0.374180000 | 3.299093000  | 0.844601000  | 1                                              | -0.540115000 | 2.197532000  | -2.622492000 |
| 1                                              | -0.170801000 | 2.599904000  | 0.662581000  | 1                                              | -0.299289000 | 1.748350000  | -2.072525000 |
| <b>C<sub>4</sub>H<sub>27</sub><sup>-</sup></b> |              |              |              | <b>C<sub>4</sub>H<sub>29</sub><sup>-</sup></b> |              |              |              |
| SCF Energy = -168.191962 a. u.                 |              |              |              | SCF Energy = -169.366341 a. u.                 |              |              |              |
| 6                                              | -1.531408000 | -0.298229000 | -0.129199000 | 6                                              | -1.392394000 | -0.485797000 | -0.002197000 |
| 6                                              | -0.187804000 | -0.128209000 | -0.041133000 | 6                                              | -0.067402000 | -0.193446000 | -0.001451000 |
| 6                                              | 1.050526000  | 0.048851000  | 0.029100000  | 6                                              | 1.151995000  | 0.095066000  | -0.000082000 |
| 6                                              | -2.739879000 | -0.448547000 | -0.206260000 | 6                                              | -2.584333000 | -0.748106000 | -0.003063000 |
| 1                                              | -3.789903000 | -0.579522000 | -0.274794000 | 1                                              | -3.621764000 | -0.968156000 | -0.003525000 |
| 1                                              | 2.699615000  | -1.231905000 | -1.476088000 | 1                                              | 2.584830000  | -0.168771000 | -2.124141000 |
| 1                                              | 3.145971000  | -1.618341000 | -1.942947000 | 1                                              | 2.967938000  | -0.253308000 | -2.766384000 |
| 1                                              | 2.161235000  | 0.728094000  | 2.250234000  | 1                                              | 2.576006000  | -0.184542000 | 2.130386000  |
| 1                                              | 2.443759000  | 0.927764000  | 2.918647000  | 1                                              | 2.956423000  | -0.272843000 | 2.773692000  |
| 1                                              | 4.374039000  | 0.478312000  | 0.281691000  | 1                                              | 4.455364000  | 0.715755000  | 0.008967000  |
| 1                                              | 3.628596000  | 0.379743000  | 0.227517000  | 1                                              | 3.713212000  | 0.583639000  | 0.008084000  |
| 1                                              | 0.348724000  | -3.205215000 | -1.544857000 | 1                                              | 0.357435000  | -2.184548000 | -2.798669000 |
| 1                                              | 0.425739000  | -2.540110000 | -1.207149000 | 1                                              | 0.463349000  | -1.721261000 | -2.218663000 |
| 1                                              | 2.633515000  | -2.389393000 | 1.534103000  | 1                                              | 3.069388000  | -2.559147000 | -0.004739000 |
| 1                                              | 2.306128000  | -1.808178000 | 1.183670000  | 1                                              | 2.659730000  | -1.926847000 | -0.004965000 |
| 1                                              | 2.702146000  | 1.606607000  | -2.428504000 | 1                                              | 2.326227000  | 2.775920000  | -1.621992000 |
| 1                                              | 2.375572000  | 1.257943000  | -1.847314000 | 1                                              | 2.097048000  | 2.164046000  | -1.249054000 |
| 1                                              | 2.283339000  | 3.127484000  | 0.446336000  | 1                                              | 2.318967000  | 2.761146000  | 1.650115000  |
| 1                                              | 2.043580000  | 2.420623000  | 0.351991000  | 1                                              | 2.088329000  | 2.154431000  | 1.269696000  |
| 1                                              | 0.259006000  | -0.230225000 | -2.736305000 | 1                                              | -0.100766000 | 0.995151000  | -2.448233000 |
| 1                                              | 0.134401000  | -0.307265000 | -3.472050000 | 1                                              | -0.328542000 | 1.241887000  | -3.119042000 |
| 1                                              | -0.652100000 | 2.582493000  | 2.014100000  | 1                                              | -0.349506000 | 1.213494000  | 3.123063000  |
| 1                                              | -0.371614000 | 2.039485000  | 1.579066000  | 1                                              | -0.109598000 | 0.980147000  | 2.451718000  |
| 1                                              | -0.391687000 | -2.662843000 | 1.256012000  | 1                                              | 0.066321000  | -3.063399000 | -0.014553000 |
| 1                                              | -0.610450000 | -3.309206000 | 1.562886000  | 1                                              | -0.062968000 | -3.800202000 | -0.009918000 |
| 1                                              | -0.356752000 | -0.634170000 | 3.376556000  | 1                                              | 0.345700000  | -2.202594000 | 2.786400000  |
| 1                                              | -0.124417000 | -0.502926000 | 2.675761000  | 1                                              | 0.454045000  | -1.737145000 | 2.208647000  |
| 1                                              | -0.437479000 | 2.874630000  | -1.692241000 | 1                                              | -0.686606000 | 3.196771000  | 0.006549000  |
| 1                                              | -0.190326000 | 2.268203000  | -1.325920000 | 1                                              | -0.381379000 | 2.511355000  | 0.005900000  |
| 1                                              | -3.482485000 | 2.965081000  | 0.213389000  | 1                                              | -3.330355000 | 2.197887000  | 1.797280000  |
| 1                                              | -3.106757000 | 2.319640000  | 0.161156000  | 1                                              | -2.932222000 | 1.668485000  | 1.448659000  |
| <b>C<sub>4</sub>H<sub>31</sub><sup>-</sup></b> |              |              |              | <b>C<sub>4</sub>H<sub>33</sub><sup>-</sup></b> |              |              |              |
| SCF Energy = -170.540116 a. u.                 |              |              |              | SCF Energy = -171.7157594 a. u.                |              |              |              |
| 6                                              | 1.318473000  | 0.074681000  | -0.243361000 | 6                                              | -1.399773000 | -0.117070000 | -0.300301000 |
| 6                                              | -0.030061000 | 0.057834000  | -0.097328000 | 6                                              | -0.059652000 | -0.030855000 | -0.099878000 |
| 6                                              | -1.274874000 | 0.022907000  | 0.043023000  | 6                                              | 1.178553000  | 0.047155000  | 0.082781000  |
| 6                                              | 2.531893000  | 0.090020000  | -0.375190000 | 6                                              | -2.603799000 | -0.197010000 | -0.480757000 |
| 1                                              | 3.586484000  | 0.095422000  | -0.487905000 | 1                                              | -3.649741000 | -0.264264000 | -0.641998000 |
| 1                                              | -2.848386000 | -0.113440000 | -1.990991000 | 1                                              | 3.401033000  | 1.028251000  | 1.252241000  |
| 1                                              | -3.270356000 | -0.157596000 | -2.612469000 | 1                                              | 4.015213000  | 1.322689000  | 1.570981000  |
| 1                                              | -2.422650000 | 1.188108000  | 2.037964000  | 1                                              | 2.217851000  | -0.661285000 | -2.320959000 |

|                                                |              |              |              |                                                |              |              |              |
|------------------------------------------------|--------------|--------------|--------------|------------------------------------------------|--------------|--------------|--------------|
| 1                                              | -2.717354000 | 1.537734000  | 2.635477000  | 1                                              | 2.359345000  | -0.789100000 | -3.046777000 |
| 1                                              | -4.617791000 | 0.031800000  | 0.395154000  | 1                                              | 4.482867000  | -0.756419000 | -0.565538000 |
| 1                                              | -3.867982000 | 0.027997000  | 0.319322000  | 1                                              | 3.754163000  | -0.621705000 | -0.438181000 |
| 1                                              | -0.396819000 | 1.150206000  | -3.365301000 | 1                                              | 1.627637000  | 3.257127000  | 1.211402000  |
| 1                                              | -0.523091000 | 0.916380000  | -2.664205000 | 1                                              | 1.539237000  | 2.581273000  | 0.896872000  |
| 1                                              | -2.729123000 | 2.859789000  | -0.721481000 | 1                                              | 2.725527000  | 2.225305000  | -1.832946000 |
| 1                                              | -2.425172000 | 2.195419000  | -0.537794000 | 1                                              | 2.473147000  | 1.714453000  | -1.340703000 |
| 1                                              | -2.996289000 | -2.769465000 | -0.610024000 | 1                                              | 2.457464000  | -1.994291000 | 2.329079000  |
| 1                                              | -2.645293000 | -2.123809000 | -0.450119000 | 1                                              | 2.233854000  | -1.490998000 | 1.815654000  |
| 1                                              | -2.670182000 | -1.769836000 | 2.497422000  | 1                                              | 2.377489000  | -3.044060000 | -0.820262000 |
| 1                                              | -2.390164000 | -1.358146000 | 1.933608000  | 1                                              | 2.076930000  | -2.414495000 | -0.543193000 |
| 1                                              | -0.464216000 | -1.800561000 | -2.049450000 | 1                                              | 1.392025000  | 0.818425000  | 2.660173000  |
| 1                                              | -0.327338000 | -2.276859000 | -2.612609000 | 1                                              | 1.489217000  | 0.945279000  | 3.393526000  |
| 1                                              | 0.307192000  | -0.362107000 | 3.302310000  | 1                                              | -0.282823000 | -2.507203000 | -2.559308000 |
| 1                                              | 0.051996000  | -0.291445000 | 2.600468000  | 1                                              | -0.083307000 | -1.996834000 | -2.049370000 |
| 1                                              | 0.322088000  | 2.728387000  | -0.999845000 | 1                                              | -0.321994000 | 2.589311000  | -0.915308000 |
| 1                                              | 0.606308000  | 3.380498000  | -1.232103000 | 1                                              | -0.647052000 | 3.251509000  | -1.044845000 |
| 1                                              | 0.159730000  | 2.849423000  | 1.927692000  | 1                                              | -0.081036000 | 1.075815000  | -3.420483000 |
| 1                                              | -0.083685000 | 2.262630000  | 1.529118000  | 1                                              | 0.040955000  | 0.759971000  | -2.752547000 |
| 1                                              | 0.096310000  | -3.214111000 | 0.947983000  | 1                                              | -0.374114000 | -3.401616000 | 0.757346000  |
| 1                                              | -0.106914000 | -2.522643000 | 0.739878000  | 1                                              | -0.239478000 | -2.674478000 | 0.638323000  |
| 1                                              | 2.984657000  | -2.176734000 | 2.291568000  | 1                                              | -0.593403000 | -0.846566000 | 2.468669000  |
| 1                                              | 2.648864000  | -1.720316000 | 1.802367000  | 1                                              | -0.912712000 | -1.130535000 | 3.083812000  |
| 1                                              | 2.476175000  | -2.677838000 | -0.916994000 | 1                                              | -1.310105000 | 2.276949000  | 2.190792000  |
| 1                                              | 2.747001000  | -3.351971000 | -1.097435000 | 1                                              | -0.883182000 | 1.841384000  | 1.756757000  |
| 1                                              | 3.318201000  | 3.295657000  | 0.818651000  | 1                                              | -3.176577000 | -2.157808000 | 1.386018000  |
| 1                                              | 2.925216000  | 2.694784000  | 0.606883000  | 1                                              | -3.611445000 | -2.598346000 | 1.806519000  |
|                                                |              |              |              | 1                                              | -3.855384000 | 2.992566000  | -0.061638000 |
|                                                |              |              |              | 1                                              | -3.333580000 | 2.456372000  | -0.075177000 |
| <b>C<sub>4</sub>H<sub>35</sub><sup>-</sup></b> |              |              |              | <b>C<sub>4</sub>H<sub>37</sub><sup>-</sup></b> |              |              |              |
| SCF Energy = -172.8904684 a. u.                |              |              |              | SCF Energy = -174.063552 a. u.                 |              |              |              |
| 6                                              | -1.287536931 | 0.172632436  | -0.214696206 | 6                                              | -1.211752000 | 0.001587000  | -0.000813000 |
| 6                                              | 0.055607004  | 0.039222089  | -0.071698755 | 6                                              | 0.145617000  | -0.003051000 | 0.004253000  |
| 6                                              | 1.296465210  | -0.084384192 | 0.059997058  | 6                                              | 1.399742000  | -0.006216000 | 0.008011000  |
| 6                                              | -2.495018870 | 0.291982543  | -0.345136810 | 6                                              | -2.432096000 | 0.006290000  | -0.006558000 |
| 1                                              | -3.544511236 | 0.396930563  | -0.457295928 | 1                                              | -3.492841000 | 0.012503000  | -0.013403000 |
| 1                                              | 3.743920570  | 0.690555672  | 0.935213894  | 1                                              | 3.831056000  | -0.789967000 | -0.879684000 |
| 1                                              | 4.370963330  | 0.983340977  | 1.228899859  | 1                                              | 4.490033000  | -1.017910000 | -1.160971000 |
| 1                                              | 2.041984406  | -1.443851128 | -2.142603226 | 1                                              | 2.052115000  | 0.529340000  | 2.548075000  |
| 1                                              | 2.167553404  | -1.782920392 | -2.800336150 | 1                                              | 2.188460000  | 0.681060000  | 3.270582000  |
| 1                                              | 4.328277247  | -1.640581237 | -0.436545830 | 1                                              | 4.499784000  | 1.005972000  | 1.147192000  |
| 1                                              | 3.663926433  | -1.304667457 | -0.329521848 | 1                                              | 3.837004000  | 0.777793000  | 0.875168000  |
| 1                                              | 2.280237466  | 3.194148271  | 0.408150179  | 1                                              | 2.133775000  | -3.137093000 | -1.169291000 |
| 1                                              | 2.150458333  | 2.462327887  | 0.304330894  | 1                                              | 1.995934000  | -2.447301000 | -0.906912000 |
| 1                                              | 3.107708755  | 1.299376743  | -2.308923107 | 1                                              | 2.958370000  | -2.228854000 | 1.898700000  |
| 1                                              | 2.771603413  | 0.988867175  | -1.710958107 | 1                                              | 2.643176000  | -1.707010000 | 1.456959000  |
| 1                                              | 2.489893259  | -1.681473409 | 2.691481215  | 1                                              | 2.944921000  | 2.213330000  | -1.898117000 |
| 1                                              | 2.218958212  | -1.344873286 | 2.074803979  | 1                                              | 2.630945000  | 1.692835000  | -1.453944000 |
| 1                                              | 1.770503248  | -3.469824218 | -0.129419821 | 1                                              | 2.139207000  | 3.129565000  | 1.168571000  |
| 1                                              | 1.665056214  | -2.733047030 | -0.031186003 | 1                                              | 2.001881000  | 2.438436000  | 0.909481000  |
| 1                                              | 1.810808562  | 1.150797001  | 2.398712315  | 1                                              | 2.032026000  | -0.533571000 | -2.543740000 |
| 1                                              | 1.901292580  | 1.483697116  | 3.065283028  | 1                                              | 2.166250000  | -0.682849000 | -3.267128000 |
| 1                                              | -0.833207041 | -2.686564100 | -1.992340171 | 1                                              | -0.620853000 | 2.151379000  | 2.605570000  |
| 1                                              | -0.409701197 | -2.239366991 | -1.566973211 | 1                                              | -0.277505000 | 1.728125000  | 2.091987000  |

|                                                |              |              |              |                                                |              |              |              |
|------------------------------------------------|--------------|--------------|--------------|------------------------------------------------|--------------|--------------|--------------|
| 1                                              | 0.207590414  | 2.428731482  | -1.453671070 | 1                                              | -0.153871000 | -2.667070000 | 0.536543000  |
| 1                                              | 0.093406664  | 3.088506501  | -1.788814368 | 1                                              | -0.454527000 | -3.335736000 | 0.691280000  |
| 1                                              | 0.037977464  | 0.325215404  | -3.562398486 | 1                                              | -0.317712000 | -1.252068000 | 3.192561000  |
| 1                                              | 0.164359278  | 0.217202919  | -2.832238130 | 1                                              | -0.018024000 | -0.998634000 | 2.554397000  |
| 1                                              | -0.975050886 | -2.914917842 | 1.458034137  | 1                                              | -0.452791000 | 3.320409000  | -0.696405000 |
| 1                                              | -0.659418883 | -2.305570239 | 1.157772086  | 1                                              | -0.145185000 | 2.656264000  | -0.535984000 |
| 1                                              | -3.796178411 | -2.923778915 | -0.520248970 | 1                                              | -3.348555000 | 3.184765000  | 1.131782000  |
| 1                                              | -3.270667302 | -2.391602818 | -0.498631021 | 1                                              | -2.901754000 | 2.617561000  | 0.934877000  |
| 1                                              | -0.404505735 | -0.143770050 | 2.638060243  | 1                                              | -0.045374000 | 0.991006000  | -2.532885000 |
| 1                                              | -0.737386800 | -0.217700874 | 3.304923062  | 1                                              | -0.349905000 | 1.237698000  | -3.171340000 |
| 1                                              | -0.613097881 | 2.991645368  | 1.660858251  | 1                                              | -0.627198000 | -2.158776000 | -2.602771000 |
| 1                                              | -0.314607516 | 2.379428566  | 1.349965030  | 1                                              | -0.285658000 | -1.735395000 | -2.088090000 |
| 1                                              | -3.315310282 | -0.954649516 | 1.993408051  | 1                                              | -3.356950000 | -2.485188000 | 2.285899000  |
| 1                                              | -3.822190118 | -1.163495667 | 2.502825292  | 1                                              | -2.920634000 | -2.029992000 | 1.882883000  |
| 1                                              | -3.020109812 | 3.705244592  | -0.632828255 | 1                                              | -2.753633000 | 2.085707000  | -1.905373000 |
| 1                                              | -2.687633567 | 3.039922737  | -0.548577945 | 1                                              | -3.175556000 | 2.551835000  | -2.311398000 |
|                                                |              |              |              | 1                                              | -3.351878000 | -3.177969000 | -1.135542000 |
|                                                |              |              |              | 1                                              | -2.903599000 | -2.611860000 | -0.938889000 |
| <b>C<sub>4</sub>H<sub>39</sub><sup>-</sup></b> |              |              |              | <b>C<sub>4</sub>H<sub>41</sub><sup>-</sup></b> |              |              |              |
| SCF Energy = -175.238577 a. u.                 |              |              |              | SCF Energy = -176.413576 a. u.                 |              |              |              |
| 6                                              | 1.102135000  | 0.070847000  | -0.206457000 | 6                                              | -1.035700949 | -0.001787032 | 0.000948815  |
| 6                                              | -0.245721000 | 0.016418000  | -0.057644000 | 6                                              | 0.320981986  | -0.001212874 | 0.000239188  |
| 6                                              | -1.491291000 | -0.033215000 | 0.080284000  | 6                                              | 1.575036285  | -0.000083081 | -0.000060855 |
| 6                                              | 2.314258000  | 0.121034000  | -0.341352000 | 6                                              | -2.256851007 | -0.002739551 | -0.000079906 |
| 1                                              | 3.367884000  | 0.163875000  | -0.458576000 | 1                                              | -3.318100104 | -0.003404726 | -0.001291722 |
| 1                                              | -4.038206000 | 0.768438000  | -0.361650000 | 1                                              | 4.022485295  | 1.176888614  | -0.002556984 |
| 1                                              | -4.730375000 | 1.018933000  | -0.514705000 | 1                                              | 4.682996399  | 1.535665497  | -0.003144900 |
| 1                                              | -1.763108000 | -0.948200000 | 2.581116000  | 1                                              | 2.207113108  | -2.281632377 | -1.247613154 |
| 1                                              | -1.814085000 | -1.211447000 | 3.282279000  | 1                                              | 2.354055047  | -2.929871332 | -1.596435154 |
| 1                                              | -4.391725000 | -1.310867000 | 1.466909000  | 1                                              | 4.683083184  | -1.533953609 | 0.011463038  |
| 1                                              | -3.778585000 | -1.016058000 | 1.147001000  | 1                                              | 4.022386339  | -1.175474653 | 0.008666865  |
| 1                                              | -2.455427000 | 3.204878000  | -0.493121000 | 1                                              | 2.350976293  | 2.914087033  | -1.625721940 |
| 1                                              | -2.266536000 | 2.489459000  | -0.366521000 | 1                                              | 2.205864250  | 2.270146056  | -1.268282817 |
| 1                                              | -2.779513000 | 1.838290000  | 2.483118000  | 1                                              | 3.094800535  | -0.013135238 | -2.938956247 |
| 1                                              | -2.528439000 | 1.397526000  | 1.926938000  | 1                                              | 2.793364240  | -0.009657485 | -2.249241967 |
| 1                                              | -3.232856000 | -2.002226000 | -1.929503000 | 1                                              | 3.092019179  | 0.016288605  | 2.941359241  |
| 1                                              | -2.877350000 | -1.543454000 | -1.450035000 | 1                                              | 2.791559216  | 0.011105843  | 2.251241199  |
| 1                                              | -2.030264000 | -3.327457000 | 0.845302000  | 1                                              | 2.348759041  | -2.912181466 | 1.629997163  |
| 1                                              | -1.940224000 | -2.600790000 | 0.679642000  | 1                                              | 2.205030796  | -2.269296197 | 1.270105303  |
| 1                                              | -2.459800000 | 0.844488000  | -2.255223000 | 1                                              | 2.204138603  | 2.280996836  | 1.248066129  |
| 1                                              | -2.689661000 | 1.091309000  | -2.925923000 | 1                                              | 2.349799403  | 2.929152181  | 1.597595111  |
| 1                                              | 0.864770000  | -2.509206000 | 2.020983000  | 1                                              | -0.409950440 | -3.368604252 | 0.015087902  |
| 1                                              | 0.464220000  | -2.011964000 | 1.629398000  | 1                                              | -0.068557029 | -2.701910240 | 0.015101131  |
| 1                                              | 0.028204000  | 2.574493000  | 0.829833000  | 1                                              | 0.087775159  | 1.287715264  | -2.386852923 |
| 1                                              | 0.345328000  | 3.222875000  | 1.031090000  | 1                                              | -0.218928566 | 1.606595887  | -2.991541120 |
| 1                                              | 0.666512000  | 0.783585000  | 3.172016000  | 1                                              | -0.216855249 | -1.638095162 | -2.976985041 |
| 1                                              | 0.299320000  | 0.616516000  | 2.540607000  | 1                                              | 0.089427780  | -1.312242100 | -2.375812169 |
| 1                                              | 0.295028000  | -3.128348000 | -1.356357000 | 1                                              | -0.221817873 | -1.593438953 | 2.995072320  |
| 1                                              | -0.009964000 | -2.511440000 | -1.059924000 | 1                                              | 0.090696747  | -1.282930972 | 2.389027313  |
| 1                                              | 3.381566000  | -3.187573000 | 0.082105000  | 1                                              | -3.099133438 | -2.932779161 | 1.754058006  |
| 1                                              | 2.914970000  | -2.603640000 | 0.043027000  | 1                                              | -2.673472255 | -2.407210901 | 1.433633244  |
| 1                                              | -0.343542000 | -0.561319000 | -2.728669000 | 1                                              | 0.077305917  | 1.319512996  | 2.370343122  |
| 1                                              | -0.119540000 | -0.691500000 | -3.431563000 | 1                                              | -0.226686833 | 1.644247377  | 2.973236350  |
| 1                                              | 0.122696000  | 2.573902000  | -2.378212000 | 1                                              | -0.411662857 | 3.367540076  | -0.017427924 |

|                                                |              |              |              |                                                |              |              |              |
|------------------------------------------------|--------------|--------------|--------------|------------------------------------------------|--------------|--------------|--------------|
| 1                                              | -0.128708000 | 2.053462000  | -1.902120000 | 1                                              | -0.070783807 | 2.700591001  | -0.016213991 |
| 1                                              | 3.281215000  | 2.430223000  | 2.134930000  | 1                                              | -2.973323135 | -0.020514614 | -3.456202137 |
| 1                                              | 2.811770000  | 2.007712000  | 1.733445000  | 1                                              | -2.574134043 | -0.013491903 | -2.823223066 |
| 1                                              | 2.432637000  | -1.617368000 | -2.601109000 | 1                                              | -2.582655914 | 0.014633338  | 2.826525132  |
| 1                                              | 2.820223000  | -1.985363000 | -3.124866000 | 1                                              | -2.983484925 | 0.024922132  | 3.458440557  |
| 1                                              | 2.969322000  | 3.480283000  | -1.142855000 | 1                                              | -3.098044920 | 2.933650716  | -1.758538021 |
| 1                                              | 2.579234000  | 2.861395000  | -0.985461000 | 1                                              | -2.673619895 | 2.407241593  | -1.437923284 |
| 1                                              | 3.077864000  | -0.766845000 | 2.229155000  | 1                                              | -2.673540519 | -2.425314055 | -1.411278151 |
| 1                                              | 3.578858000  | -0.937081000 | 2.758513000  | 1                                              | -3.097217287 | -2.956434972 | -1.725023109 |
|                                                |              |              |              | 1                                              | -2.677742715 | 2.422904182  | 1.401633367  |
|                                                |              |              |              | 1                                              | -3.104722079 | 2.952625425  | 1.713331996  |
| <b>C<sub>4</sub>H<sub>43</sub><sup>-</sup></b> |              |              |              | <b>C<sub>4</sub>H<sub>45</sub><sup>-</sup></b> |              |              |              |
| SCF Energy = -177.586407 a. u.                 |              |              |              | SCF Energy = -178.75989 a. u.                  |              |              |              |
| 6                                              | 0.952316000  | 0.114861000  | 0.117102000  | 6                                              | 0.790381000  | 0.019266000  | 0.145284000  |
| 6                                              | -0.396969000 | 0.022723000  | 0.008499000  | 6                                              | -0.558961000 | -0.013136000 | 0.007772000  |
| 6                                              | -1.644308000 | -0.068418000 | -0.085233000 | 6                                              | -1.808076000 | -0.027818000 | -0.105782000 |
| 6                                              | 2.167174000  | 0.192686000  | 0.215185000  | 6                                              | 2.005513000  | 0.053644000  | 0.268766000  |
| 1                                              | 3.220538000  | 0.276847000  | 0.312319000  | 1                                              | 3.055839000  | 0.093650000  | 0.414694000  |
| 1                                              | -4.104549000 | 0.885782000  | -0.705895000 | 1                                              | -4.198441000 | -1.204658000 | -0.568114000 |
| 1                                              | -4.771156000 | 1.180642000  | -0.889359000 | 1                                              | -4.846637000 | -1.561142000 | -0.702467000 |
| 1                                              | -1.704743000 | -0.724403000 | 2.542795000  | 1                                              | -1.670535000 | 2.139805000  | -1.708257000 |
| 1                                              | -1.756994000 | -0.921220000 | 3.265346000  | 1                                              | -1.638709000 | 2.744964000  | -2.151431000 |
| 1                                              | -4.545604000 | -0.588022000 | 1.676957000  | 1                                              | -4.555614000 | 1.428071000  | -1.547132000 |
| 1                                              | -3.929996000 | -0.478367000 | 1.259544000  | 1                                              | -3.969251000 | 1.090488000  | -1.218846000 |
| 1                                              | -2.371732000 | 3.012522000  | -1.431822000 | 1                                              | -2.329896000 | -3.293841000 | -1.007186000 |
| 1                                              | -2.232711000 | 2.334352000  | -1.142070000 | 1                                              | -2.240220000 | -2.574294000 | -0.813249000 |
| 1                                              | -3.017870000 | 2.326568000  | 1.763633000  | 1                                              | -2.687561000 | -0.769567000 | -3.206799000 |
| 1                                              | -2.730569000 | 1.771751000  | 1.344784000  | 1                                              | -2.524526000 | -0.583836000 | -2.496052000 |
| 1                                              | -4.280403000 | -1.878037000 | -1.345702000 | 1                                              | -4.721216000 | 0.534373000  | 1.613358000  |
| 1                                              | -3.728906000 | -1.460011000 | -1.051864000 | 1                                              | -4.100267000 | 0.410142000  | 1.207894000  |
| 1                                              | -2.727677000 | -3.103772000 | 1.117653000  | 1                                              | -3.079021000 | 3.061045000  | 0.712903000  |
| 1                                              | -2.534730000 | -2.430284000 | 0.848050000  | 1                                              | -2.843686000 | 2.372298000  | 0.529061000  |
| 1                                              | -2.381911000 | 0.131986000  | -2.531306000 | 1                                              | -2.739441000 | -1.711096000 | 1.607513000  |
| 1                                              | -2.562247000 | 0.202728000  | -3.258269000 | 1                                              | -2.972641000 | -2.219233000 | 2.110606000  |
| 1                                              | 0.416802000  | -3.005147000 | 1.407925000  | 1                                              | 0.072928000  | 3.228784000  | 1.011373000  |
| 1                                              | 0.059197000  | -2.416822000 | 1.112701000  | 1                                              | -0.257836000 | 2.592467000  | 0.795092000  |
| 1                                              | -0.123036000 | 2.783632000  | 0.288498000  | 1                                              | 0.028191000  | -1.966106000 | -1.862810000 |
| 1                                              | 0.169265000  | 3.459520000  | 0.424389000  | 1                                              | 0.399293000  | -2.432332000 | -2.316684000 |
| 1                                              | -0.095594000 | 1.762713000  | 3.059302000  | 1                                              | 0.322848000  | 0.547071000  | -3.341220000 |
| 1                                              | -0.313986000 | 1.416213000  | 2.432999000  | 1                                              | -0.044493000 | 0.427297000  | -2.700051000 |
| 1                                              | -1.304532000 | -3.065515000 | -1.759817000 | 1                                              | -1.918593000 | 1.256758000  | 3.116935000  |
| 1                                              | -1.361848000 | -2.408151000 | -1.401813000 | 1                                              | -1.873918000 | 0.971262000  | 2.424095000  |
| 1                                              | 3.613486000  | -2.710600000 | 1.569243000  | 1                                              | 3.294548000  | 3.208476000  | 1.152385000  |
| 1                                              | 3.060492000  | -2.257925000 | 1.348160000  | 1                                              | 2.758853000  | 2.708999000  | 1.000898000  |
| 1                                              | 0.125962000  | -0.748999000 | -2.618551000 | 1                                              | -0.300015000 | -1.059527000 | 2.621683000  |
| 1                                              | 0.482985000  | -0.921298000 | -3.253405000 | 1                                              | -0.052917000 | -1.286896000 | 3.290384000  |
| 1                                              | 0.444163000  | 2.177838000  | -2.611859000 | 1                                              | 0.207275000  | -3.303984000 | 0.911050000  |
| 1                                              | 0.100634000  | 1.745862000  | -2.105709000 | 1                                              | -0.129795000 | -2.674936000 | 0.683798000  |
| 1                                              | 2.868161000  | 2.745771000  | 2.444107000  | 1                                              | 3.220787000  | -0.660321000 | -2.868225000 |
| 1                                              | 2.462286000  | 2.266558000  | 2.036686000  | 1                                              | 2.726826000  | -0.515518000 | -2.323793000 |
| 1                                              | 1.884271000  | -2.335149000 | -1.177682000 | 1                                              | 1.390594000  | 1.116814000  | 2.853236000  |
| 1                                              | 2.123990000  | -2.976442000 | -1.480467000 | 1                                              | 1.564608000  | 1.436183000  | 3.507495000  |
| 1                                              | 3.063691000  | 3.309677000  | -1.043924000 | 1                                              | 2.973532000  | -3.209530000 | -0.625399000 |
| 1                                              | 2.614110000  | 2.747052000  | -0.840118000 | 1                                              | 2.535023000  | -2.617204000 | -0.492949000 |

|                                                |              |              |              |                                                |              |              |              |
|------------------------------------------------|--------------|--------------|--------------|------------------------------------------------|--------------|--------------|--------------|
| 1                                              | 1.542942000  | -0.571551000 | 2.950774000  | 1                                              | 1.574549000  | 2.306273000  | -1.506887000 |
| 1                                              | 1.723790000  | -0.791352000 | 3.642788000  | 1                                              | 1.781090000  | 2.929560000  | -1.866515000 |
| 1                                              | 2.814988000  | 0.359191000  | -2.493909000 | 1                                              | 2.516363000  | -1.790165000 | 2.244240000  |
| 1                                              | 3.306317000  | 0.414541000  | -3.056104000 | 1                                              | 2.999830000  | -2.173877000 | 2.668336000  |
| 1                                              | 4.634070000  | -1.539575000 | -1.075165000 | 1                                              | 4.859187000  | -1.377766000 | -0.328316000 |
| 1                                              | 5.379381000  | -1.550213000 | -1.107163000 | 1                                              | 5.525557000  | -1.149823000 | -0.081733000 |
| <b>C<sub>4</sub>H<sub>47</sub><sup>-</sup></b> |              |              |              | <b>C<sub>4</sub>H<sub>49</sub><sup>-</sup></b> |              |              |              |
| SCF Energy = -179.934358 a. u.                 |              |              |              | SCF Energy = -181.108839 a. u.                 |              |              |              |
| 6                                              | -0.651275000 | 0.023533000  | 0.010878000  | 6                                              | -0.626149000 | -0.000381000 | 0.000837000  |
| 6                                              | 0.705075000  | 0.023760000  | -0.000667000 | 6                                              | 0.730641000  | 0.006471000  | 0.001742000  |
| 6                                              | 1.959554000  | 0.008554000  | -0.009276000 | 6                                              | 1.985248000  | 0.010445000  | 0.002248000  |
| 6                                              | -1.872797000 | 0.017986000  | 0.020978000  | 6                                              | -1.847849000 | -0.007257000 | -0.000075000 |
| 1                                              | -2.933450000 | 0.012467000  | 0.036848000  | 1                                              | -2.909021000 | -0.024017000 | -0.000462000 |
| 1                                              | 4.391720000  | 1.182758000  | -0.011336000 | 1                                              | 4.361405000  | -0.569550000 | 1.252776000  |
| 1                                              | 5.054127000  | 1.538908000  | -0.011501000 | 1                                              | 4.992632000  | -0.740320000 | 1.622193000  |
| 1                                              | 1.827649000  | -1.647897000 | -2.140584000 | 1                                              | 2.379129000  | 2.676453000  | -0.269928000 |
| 1                                              | 1.815539000  | -2.124689000 | -2.720725000 | 1                                              | 2.468835000  | 3.417051000  | -0.348350000 |
| 1                                              | 4.741308000  | -1.114073000 | -1.656819000 | 1                                              | 5.004957000  | 1.764798000  | -0.188545000 |
| 1                                              | 4.150445000  | -0.854684000 | -1.270108000 | 1                                              | 4.371929000  | 1.363524000  | -0.139959000 |
| 1                                              | 2.586090000  | 3.382070000  | -0.006232000 | 1                                              | 2.436836000  | -1.408593000 | 3.125067000  |
| 1                                              | 2.467508000  | 2.640797000  | -0.007657000 | 1                                              | 2.371434000  | -1.102398000 | 2.443477000  |
| 1                                              | 3.022873000  | 1.487668000  | -2.782097000 | 1                                              | 3.058809000  | 1.843025000  | 2.556818000  |
| 1                                              | 2.807291000  | 1.144880000  | -2.147773000 | 1                                              | 2.847850000  | 1.414245000  | 1.976011000  |
| 1                                              | 4.736491000  | -1.100595000 | 1.657039000  | 1                                              | 4.986498000  | -1.056152000 | -1.450797000 |
| 1                                              | 4.147674000  | -0.844929000 | 1.264906000  | 1                                              | 4.361402000  | -0.810194000 | -1.114918000 |
| 1                                              | 3.118617000  | -3.230958000 | 0.010862000  | 1                                              | 3.045031000  | 1.287138000  | -2.881312000 |
| 1                                              | 2.893396000  | -2.514653000 | 0.003690000  | 1                                              | 2.845588000  | 0.993605000  | -2.218211000 |
| 1                                              | 2.799957000  | 1.152576000  | 2.134912000  | 1                                              | 2.816954000  | -2.414507000 | 0.244362000  |
| 1                                              | 3.016316000  | 1.497042000  | 2.767919000  | 1                                              | 3.012289000  | -3.136934000 | 0.319222000  |
| 1                                              | -0.043376000 | -3.311657000 | 0.017501000  | 1                                              | -0.029282000 | 2.670032000  | -2.111315000 |
| 1                                              | 0.325222000  | -2.659358000 | 0.014664000  | 1                                              | 0.298675000  | 2.167623000  | -1.663316000 |
| 1                                              | 0.266451000  | 2.406387000  | -1.351389000 | 1                                              | 0.278769000  | 0.334520000  | 2.716296000  |
| 1                                              | -0.051392000 | 2.981542000  | -1.710702000 | 1                                              | -0.059561000 | 0.457384000  | 3.372837000  |
| 1                                              | -0.026506000 | 0.378357000  | -3.433340000 | 1                                              | -0.017108000 | 3.039033000  | 1.545390000  |
| 1                                              | 0.313062000  | 0.314433000  | -2.769414000 | 1                                              | 0.291905000  | 2.448064000  | 1.204899000  |
| 1                                              | 1.805479000  | -2.109062000 | 2.722899000  | 1                                              | 2.441751000  | -2.008864000 | -2.777614000 |
| 1                                              | 1.817023000  | -1.634397000 | 2.141055000  | 1                                              | 2.363250000  | -1.570341000 | -2.174163000 |
| 1                                              | -3.124184000 | -3.293254000 | -0.011948000 | 1                                              | -3.096229000 | 1.318157000  | -2.903372000 |
| 1                                              | -2.622380000 | -2.738599000 | -0.000051000 | 1                                              | -2.579952000 | 1.096578000  | -2.408091000 |
| 1                                              | 0.297929000  | 0.331101000  | 2.769841000  | 1                                              | 0.272827000  | -2.504255000 | -1.048100000 |
| 1                                              | -0.016863000 | 0.383715000  | 3.446755000  | 1                                              | -0.064251000 | -3.135774000 | -1.267773000 |
| 1                                              | -0.053415000 | 2.982668000  | 1.712717000  | 1                                              | -0.062600000 | -2.826946000 | 1.873296000  |
| 1                                              | 0.264408000  | 2.415888000  | 1.340322000  | 1                                              | 0.265447000  | -2.242121000 | 1.540156000  |
| 1                                              | -2.999228000 | 1.472687000  | -2.823193000 | 1                                              | -3.103727000 | 1.872935000  | 2.582234000  |
| 1                                              | -2.499189000 | 1.233754000  | -2.319112000 | 1                                              | -2.589508000 | 1.550407000  | 2.143528000  |
| 1                                              | -1.473680000 | -1.720876000 | 2.256975000  | 1                                              | 0.280300000  | -0.211246000 | -2.717898000 |
| 1                                              | -1.710367000 | -2.186285000 | 2.793692000  | 1                                              | -0.054504000 | -0.224305000 | -3.387541000 |
| 1                                              | -2.650517000 | 3.442397000  | -0.011592000 | 1                                              | -2.531423000 | -1.426084000 | 3.161524000  |
| 1                                              | -2.261313000 | 2.802760000  | -0.009279000 | 1                                              | -2.154626000 | -1.162494000 | 2.570552000  |
| 1                                              | -1.455115000 | -1.725416000 | -2.234321000 | 1                                              | -2.086722000 | 2.811623000  | -0.278768000 |
| 1                                              | -1.686547000 | -2.195287000 | -2.769285000 | 1                                              | -2.457745000 | 3.458637000  | -0.344844000 |
| 1                                              | -2.495829000 | 1.241346000  | 2.377009000  | 1                                              | -2.434036000 | -2.697884000 | 0.273138000  |



|                                                |              |              |              |                                               |              |              |              |
|------------------------------------------------|--------------|--------------|--------------|-----------------------------------------------|--------------|--------------|--------------|
| 1                                              | -3.022752000 | 1.498186000  | 2.843350000  | 1                                             | -2.950303000 | -3.238851000 | 0.317140000  |
| 1                                              | -4.621356000 | 1.762622000  | -0.092720000 | 1                                             | -4.584495000 | -0.747228000 | 1.793776000  |
| 1                                              | -5.314892000 | 1.495304000  | -0.027499000 | 1                                             | -5.288315000 | -0.755136000 | 1.545683000  |
| 1                                              | -4.229372000 | -1.185670000 | -1.739446000 | 1                                             | -4.513137000 | 1.960915000  | -0.196866000 |
| 1                                              | -4.972601000 | -1.118861000 | -1.738129000 | 1                                             | -5.247897000 | 1.830456000  | -0.183147000 |
| 1                                              | -4.266667000 | -1.146432000 | 1.786436000  | 1                                             | -2.128385000 | -1.652256000 | -2.304522000 |
| 1                                              | -4.978934000 | -1.167672000 | 1.565392000  | 1                                             | -2.517068000 | -2.026752000 | -2.823513000 |
|                                                |              |              |              | 1                                             | -5.276205000 | -1.052525000 | -1.383678000 |
|                                                |              |              |              | 1                                             | -4.569742000 | -1.086138000 | -1.621882000 |
| <b>C<sub>4</sub>H<sub>51</sub><sup>-</sup></b> |              |              |              | <b>C<sub>6</sub>H<sub>3</sub><sup>-</sup></b> |              |              |              |
| SCF Energy = -182.281408 a. u.                 |              |              |              | SCF Energy = -230.27353 a. u.                 |              |              |              |
| 6                                              | -0.476227000 | 0.144987000  | -0.031801000 | 6                                             | 0.000349786  | 0.001025016  | -3.395276373 |
| 6                                              | 0.872945000  | 0.004207000  | 0.001845000  | 6                                             | -0.000155049 | 0.000815991  | -2.171722263 |
| 6                                              | 2.120442000  | -0.126701000 | 0.032952000  | 6                                             | 0.000183095  | -0.000075672 | -0.829458350 |
| 6                                              | -1.691068000 | 0.271872000  | -0.060217000 | 1                                             | -0.001412903 | 0.002162218  | -4.455452299 |
| 1                                              | -2.746921000 | 0.378650000  | -0.084279000 | 6                                             | -0.000035984 | -0.000787945 | 0.407704082  |
| 1                                              | 4.352297000  | -1.387735000 | 1.034062000  | 6                                             | -0.000203204 | -0.001817724 | 1.746891888  |
| 1                                              | 4.937468000  | -1.757756000 | 1.325073000  | 6                                             | 0.000103719  | -0.002480783 | 3.007686318  |
| 1                                              | 2.741807000  | 2.371584000  | 0.869060000  | 1                                             | -0.000438159 | 0.007353447  | 5.551558302  |
| 1                                              | 2.887972000  | 3.068514000  | 1.104879000  | 1                                             | 0.000396354  | 0.010413150  | 6.308940594  |
| 1                                              | 5.270895000  | 1.250824000  | 0.691327000  |                                               |              |              |              |
| 1                                              | 4.611490000  | 0.925638000  | 0.538056000  |                                               |              |              |              |
| 1                                              | 2.244068000  | -2.698420000 | 2.349954000  |                                               |              |              |              |
| 1                                              | 2.237685000  | -2.141052000 | 1.848045000  |                                               |              |              |              |
| 1                                              | 3.130159000  | 0.414118000  | 3.158492000  |                                               |              |              |              |
| 1                                              | 2.934757000  | 0.293915000  | 2.442297000  |                                               |              |              |              |
| 1                                              | 5.135951000  | -0.807335000 | -1.613343000 |                                               |              |              |              |
| 1                                              | 4.503708000  | -0.661657000 | -1.235058000 |                                               |              |              |              |
| 1                                              | 3.471321000  | 2.097309000  | -2.034103000 |                                               |              |              |              |
| 1                                              | 3.209203000  | 1.573404000  | -1.562415000 |                                               |              |              |              |
| 1                                              | 2.746096000  | -2.515691000 | -0.693287000 |                                               |              |              |              |
| 1                                              | 2.877473000  | -3.222121000 | -0.915441000 |                                               |              |              |              |
| 1                                              | 0.494249000  | 3.347203000  | -0.904562000 |                                               |              |              |              |
| 1                                              | 0.732329000  | 2.671370000  | -0.687265000 |                                               |              |              |              |
| 1                                              | 0.216461000  | -0.737514000 | 2.587646000  |                                               |              |              |              |
| 1                                              | -0.163016000 | -0.868219000 | 3.219732000  |                                               |              |              |              |
| 1                                              | 0.270464000  | 2.231567000  | 2.596600000  |                                               |              |              |              |
| 1                                              | 0.569631000  | 1.800809000  | 2.062155000  |                                               |              |              |              |
| 1                                              | 2.620293000  | -0.875569000 | -3.306568000 |                                               |              |              |              |
| 1                                              | 2.531063000  | -0.717385000 | -2.578764000 |                                               |              |              |              |
| 1                                              | -2.576306000 | 2.702391000  | -2.323351000 |                                               |              |              |              |
| 1                                              | -2.116476000 | 2.255608000  | -1.936166000 |                                               |              |              |              |
| 1                                              | 0.323229000  | -1.811485000 | -1.981192000 |                                               |              |              |              |
| 1                                              | -0.041007000 | -2.253665000 | -2.463499000 |                                               |              |              |              |
| 1                                              | -0.280817000 | -3.225263000 | 0.590892000  |                                               |              |              |              |
| 1                                              | 0.119012000  | -2.598533000 | 0.501128000  |                                               |              |              |              |
| 1                                              | -2.737383000 | 1.179282000  | 3.075979000  |                                               |              |              |              |
| 1                                              | -2.254968000 | 0.978121000  | 2.539289000  |                                               |              |              |              |
| 1                                              | 0.574644000  | 0.909268000  | -2.589667000 |                                               |              |              |              |
| 1                                              | 0.257606000  | 1.196792000  | -3.204119000 |                                               |              |              |              |
| 1                                              | -2.871647000 | -2.188998000 | 2.110032000  |                                               |              |              |              |
| 1                                              | -2.396270000 | -1.755814000 | 1.725734000  |                                               |              |              |              |
| 1                                              | -1.657873000 | 3.002750000  | 0.752250000  |                                               |              |              |              |
| 1                                              | -1.964871000 | 3.661660000  | 0.931447000  |                                               |              |              |              |

|                                                |              |              |              |                                                |              |              |              |
|------------------------------------------------|--------------|--------------|--------------|------------------------------------------------|--------------|--------------|--------------|
| 1                                              | -2.406086000 | -2.241185000 | -0.964986000 |                                                |              |              |              |
| 1                                              | -2.893030000 | -2.757641000 | -1.204150000 |                                                |              |              |              |
| 1                                              | -5.132247000 | -2.915694000 | 0.229864000  |                                                |              |              |              |
| 1                                              | -5.771509000 | -3.299508000 | 0.242311000  |                                                |              |              |              |
| 1                                              | -4.150842000 | 2.517374000  | 0.299195000  |                                                |              |              |              |
| 1                                              | -4.883778000 | 2.497638000  | 0.159808000  |                                                |              |              |              |
| 1                                              | -2.006212000 | -0.334164000 | -2.840806000 |                                                |              |              |              |
| 1                                              | -2.398066000 | -0.430347000 | -3.471488000 |                                                |              |              |              |
| 1                                              | -5.055892000 | -0.213995000 | -1.435561000 |                                                |              |              |              |
| 1                                              | -4.406696000 | -0.165897000 | -1.801284000 |                                                |              |              |              |
| 1                                              | -5.391384000 | -0.198820000 | 1.577109000  |                                                |              |              |              |
| 1                                              | -4.654587000 | -0.310516000 | 1.612262000  |                                                |              |              |              |
| <b>C<sub>6</sub>H<sub>5</sub><sup>-</sup></b>  |              |              |              | <b>C<sub>6</sub>H<sub>7</sub><sup>-</sup></b>  |              |              |              |
| SCF Energy = -231.44840 a. u.                  |              |              |              | SCF Energy = -232.62365 a. u.                  |              |              |              |
| 6                                              | 3.639231000  | 0.038376000  | 0.019138000  | 6                                              | -3.868949000 | 0.053774000  | -0.006811000 |
| 6                                              | 2.416207000  | 0.012982000  | 0.007894000  | 6                                              | -2.646451000 | 0.019406000  | -0.002064000 |
| 6                                              | 1.073830000  | -0.013712000 | -0.004265000 | 6                                              | -1.304063000 | -0.017547000 | 0.002572000  |
| 6                                              | -0.162650000 | -0.038303000 | -0.014502000 | 6                                              | -0.068235000 | -0.050460000 | 0.006746000  |
| 6                                              | -1.502170000 | -0.063469000 | -0.025039000 | 6                                              | 1.271438000  | -0.084645000 | 0.010510000  |
| 6                                              | -2.761557000 | -0.088450000 | -0.031778000 | 6                                              | 2.529733000  | -0.118243000 | 0.013257000  |
| 1                                              | -5.301975000 | 1.991082000  | 0.058695000  | 1                                              | 4.693203000  | -0.371804000 | 1.352980000  |
| 1                                              | -4.758688000 | 1.466736000  | 0.043739000  | 1                                              | 5.355394000  | -0.445586000 | 1.707485000  |
| 1                                              | -5.765988000 | -1.467516000 | 0.109286000  | 1                                              | 4.932007000  | 2.116089000  | -0.309366000 |
| 1                                              | -5.089715000 | -1.135250000 | 0.050645000  | 1                                              | 4.399157000  | 1.584244000  | -0.265964000 |
| 1                                              | 4.699020000  | 0.060401000  | 0.028948000  | 1                                              | 5.361285000  | -0.969712000 | -1.480357000 |
|                                                |              |              |              | 1                                              | 4.706712000  | -0.811560000 | -1.139462000 |
|                                                |              |              |              | 1                                              | -4.928594000 | 0.084614000  | -0.010568000 |
| <b>C<sub>6</sub>H<sub>9</sub><sup>-</sup></b>  |              |              |              | <b>C<sub>6</sub>H<sub>11</sub><sup>-</sup></b> |              |              |              |
| SCF Energy = -233.79853 a. u.                  |              |              |              | SCF Energy = -234.97340 a. u.                  |              |              |              |
| 6                                              | -4.036320000 | 0.007729000  | 0.005467000  | 6                                              | -4.162744000 | 0.000247000  | 0.064915000  |
| 6                                              | -2.813772000 | 0.001075000  | 0.001944000  | 6                                              | -2.941006000 | 0.000179000  | 0.028628000  |
| 6                                              | -1.470886000 | -0.005820000 | -0.001867000 | 6                                              | -1.598517000 | 0.000022000  | -0.010605000 |
| 1                                              | -5.096540000 | 0.013846000  | 0.008629000  | 1                                              | -5.222573000 | 0.000197000  | 0.095228000  |
| 6                                              | -0.235171000 | -0.010704000 | -0.005348000 | 6                                              | -0.363734000 | -0.000355000 | -0.046869000 |
| 6                                              | 1.104984000  | -0.014866000 | -0.008773000 | 6                                              | 0.976129000  | -0.000971000 | -0.085648000 |
| 6                                              | 2.363285000  | -0.015462000 | -0.012127000 | 6                                              | 2.233364000  | -0.001707000 | -0.128221000 |
| 1                                              | 3.759247000  | 2.109929000  | -0.004498000 | 1                                              | 3.764864000  | 1.301376000  | 1.441690000  |
| 1                                              | 4.141402000  | 2.759185000  | -0.000369000 | 1                                              | 4.191383000  | 1.693069000  | 1.923292000  |
| 1                                              | 4.561275000  | 0.042784000  | 1.301776000  | 1                                              | 3.768540000  | -1.300157000 | 1.441920000  |
| 1                                              | 5.205043000  | 0.054789000  | 1.694669000  | 1                                              | 4.196375000  | -1.690639000 | 1.923421000  |
| 1                                              | 5.258326000  | 0.032118000  | -1.637862000 | 1                                              | 5.546190000  | 0.010390000  | -0.643713000 |
| 1                                              | 4.603869000  | 0.020769000  | -1.262889000 | 1                                              | 4.800198000  | 0.000452000  | -0.534119000 |
| 1                                              | 4.248860000  | -2.720868000 | 0.016161000  | 1                                              | 3.683178000  | -2.745603000 | -1.272526000 |
| 1                                              | 3.845792000  | -2.084263000 | 0.008603000  | 1                                              | 3.369110000  | -2.110512000 | -1.017921000 |
|                                                |              |              |              | 1                                              | 3.364655000  | 2.110525000  | -1.018001000 |
|                                                |              |              |              | 1                                              | 3.677128000  | 2.746411000  | -1.272464000 |
| <b>C<sub>6</sub>H<sub>13</sub><sup>-</sup></b> |              |              |              | <b>C<sub>6</sub>H<sub>15</sub><sup>-</sup></b> |              |              |              |
| SCF Energy = -236.14894 a. u.                  |              |              |              | SCF Energy = -237.32351 a. u.                  |              |              |              |
| 6                                              | 4.302542000  | -0.000228000 | 0.001251000  | 6                                              | -4.361034000 | -0.032006000 | 0.017088000  |
| 6                                              | 3.080494000  | -0.000045000 | 0.000047000  | 6                                              | -3.139672000 | -0.002625000 | -0.002939000 |

|                                                |              |              |              |                                                |              |              |              |
|------------------------------------------------|--------------|--------------|--------------|------------------------------------------------|--------------|--------------|--------------|
| 6                                              | 1.737614000  | 0.000083000  | -0.000817000 | 6                                              | -1.796676000 | 0.028331000  | -0.024592000 |
| 1                                              | 5.362879000  | -0.000764000 | 0.001979000  | 6                                              | -0.562331000 | 0.052907000  | -0.042420000 |
| 6                                              | 0.502612000  | -0.000018000 | -0.001450000 | 6                                              | 0.778428000  | 0.076759000  | -0.062104000 |
| 6                                              | -0.838204000 | -0.000985000 | -0.001158000 | 6                                              | 2.035668000  | 0.087084000  | -0.076634000 |
| 6                                              | -2.095756000 | -0.002939000 | 0.000500000  | 1                                              | 2.642964000  | -1.260149000 | 2.079530000  |
| 1                                              | -3.367572000 | -0.059968000 | -2.221811000 | 1                                              | 2.775522000  | -1.601615000 | 2.735427000  |
| 1                                              | -3.719394000 | -0.078717000 | -2.886914000 | 1                                              | 4.430450000  | -0.921840000 | 0.153372000  |
| 1                                              | -3.361316000 | -2.136482000 | -0.628452000 | 1                                              | 5.101929000  | -1.252597000 | 0.236793000  |
| 1                                              | -3.706640000 | -2.777580000 | -0.819012000 | 1                                              | 4.200922000  | 1.391748000  | 2.071503000  |
| 1                                              | -5.452311000 | 0.006575000  | 0.003613000  | 1                                              | 3.703422000  | 1.140560000  | 1.565355000  |
| 1                                              | -4.698564000 | 0.004686000  | 0.003379000  | 1                                              | 4.752387000  | 1.613577000  | -1.296372000 |
| 1                                              | -3.713333000 | -1.639918000 | 2.384587000  | 1                                              | 4.140371000  | 1.282732000  | -1.008247000 |
| 1                                              | -3.367306000 | -1.257819000 | 1.836093000  | 1                                              | 3.494505000  | -1.147141000 | -2.770489000 |
| 1                                              | -3.350229000 | 2.100407000  | -0.746306000 | 1                                              | 3.184289000  | -0.849193000 | -2.152971000 |
| 1                                              | -3.695223000 | 2.730560000  | -0.970704000 | 1                                              | 2.274811000  | 3.492603000  | -0.055266000 |
| 1                                              | -3.704927000 | 1.773127000  | 2.290627000  | 1                                              | 2.167444000  | 2.754624000  | 0.029203000  |
| 1                                              | -3.361886000 | 1.360692000  | 1.762684000  | 1                                              | 2.356226000  | -2.554764000 | -0.278706000 |
|                                                |              |              |              | 1                                              | 2.469176000  | -3.292019000 | -0.195040000 |
|                                                |              |              |              | 1                                              | -5.420727000 | -0.059219000 | 0.035512000  |
| <b>C<sub>6</sub>H<sub>17</sub><sup>-</sup></b> |              |              |              | <b>C<sub>6</sub>H<sub>19</sub><sup>-</sup></b> |              |              |              |
| SCF Energy = -238.49895 a. u.                  |              |              |              | SCF Energy = -239.67366 a. u.                  |              |              |              |
| 6                                              | -4.443822000 | 0.001221000  | 0.006963000  | 6                                              | -4.430370000 | -0.000421000 | 0.061906000  |
| 6                                              | -3.222282000 | 0.002776000  | -0.005675000 | 6                                              | -3.209727000 | -0.000541000 | 0.096463000  |
| 6                                              | -1.878644000 | 0.004581000  | -0.019055000 | 6                                              | -1.866530000 | -0.000730000 | 0.136399000  |
| 6                                              | -0.644351000 | 0.006537000  | -0.030556000 | 6                                              | -0.633478000 | -0.000967000 | 0.178117000  |
| 6                                              | 0.696967000  | 0.008933000  | -0.040968000 | 6                                              | 0.707275000  | -0.001149000 | 0.215689000  |
| 6                                              | 1.954186000  | 0.011090000  | -0.046756000 | 6                                              | 1.964697000  | -0.001646000 | 0.215293000  |
| 1                                              | 2.309466000  | 2.284238000  | -1.336374000 | 1                                              | 3.087394000  | 2.167780000  | 1.008445000  |
| 1                                              | 2.410790000  | 2.947141000  | -1.674262000 | 1                                              | 3.389349000  | 2.821548000  | 1.225537000  |
| 1                                              | 4.259142000  | 1.233302000  | 0.111999000  | 1                                              | 4.547685000  | 0.008965000  | 0.584782000  |
| 1                                              | 4.924160000  | 1.578715000  | 0.184036000  | 1                                              | 5.290632000  | 0.011631000  | 0.709306000  |
| 1                                              | 4.076874000  | 0.000416000  | -2.608266000 | 1                                              | 3.941931000  | 1.663471000  | -1.903123000 |
| 1                                              | 3.559038000  | 0.002323000  | -2.062496000 | 1                                              | 3.522191000  | 1.283311000  | -1.408024000 |
| 1                                              | 4.891492000  | -1.622108000 | 0.160486000  | 1                                              | 3.954942000  | -1.656788000 | -1.898478000 |
| 1                                              | 4.227744000  | -1.273728000 | 0.091765000  | 1                                              | 3.531608000  | -1.279136000 | -1.404500000 |
| 1                                              | 3.581949000  | -0.091489000 | 2.837204000  | 1                                              | 1.059077000  | 2.449702000  | -1.026805000 |
| 1                                              | 3.242397000  | -0.036563000 | 2.168064000  | 1                                              | 0.903248000  | 3.100678000  | -1.363955000 |
| 1                                              | 2.347424000  | -2.924745000 | -1.720960000 | 1                                              | 3.408485000  | -2.812010000 | 1.231346000  |
| 1                                              | 2.251953000  | -2.261750000 | -1.381879000 | 1                                              | 3.102706000  | -2.160348000 | 1.013159000  |
| 1                                              | 2.159042000  | 2.277128000  | 1.354989000  | 1                                              | 1.191281000  | -0.006709000 | -3.262898000 |
| 1                                              | 2.242406000  | 2.940065000  | 1.696885000  | 1                                              | 1.293393000  | -0.005513000 | -2.520001000 |
| 1                                              | 2.084026000  | -2.299547000 | 1.318541000  | 1                                              | 2.911126000  | 0.004341000  | 2.614261000  |
| 1                                              | 2.163737000  | -2.964163000 | 1.657806000  | 1                                              | 3.169039000  | 0.005739000  | 3.320514000  |
| 1                                              | -5.503962000 | -0.000062000 | 0.018748000  | 1                                              | 1.073934000  | -2.455469000 | -1.018572000 |
|                                                |              |              |              | 1                                              | 0.921008000  | -3.108186000 | -1.353734000 |
|                                                |              |              |              | 1                                              | -5.490226000 | -0.000282000 | 0.029542000  |
| <b>C<sub>6</sub>H<sub>21</sub><sup>-</sup></b> |              |              |              | <b>C<sub>6</sub>H<sub>23</sub><sup>-</sup></b> |              |              |              |
| SCF Energy = -240.84899 a. u.                  |              |              |              | SCF Energy = -242.02422 a. u.                  |              |              |              |
| 6                                              | 4.483672000  | -0.022051000 | 0.001347000  | 6                                              | -4.458932000 | -0.008413000 | -0.008569000 |
| 6                                              | 3.262586000  | -0.032067000 | -0.001186000 | 6                                              | -3.238221000 | -0.011158000 | -0.020065000 |
| 6                                              | 1.918646000  | -0.041530000 | -0.004203000 | 6                                              | -1.893950000 | -0.013439000 | -0.030953000 |
| 6                                              | 0.684993000  | -0.048844000 | -0.008204000 | 6                                              | -0.660818000 | -0.014614000 | -0.035561000 |

|                                                |              |              |              |                                                |              |              |              |
|------------------------------------------------|--------------|--------------|--------------|------------------------------------------------|--------------|--------------|--------------|
| 6                                              | -0.656591000 | -0.046251000 | -0.013338000 | 6                                              | 0.681009000  | -0.011738000 | -0.032408000 |
| 6                                              | -1.913801000 | -0.039659000 | -0.019734000 | 6                                              | 1.938384000  | -0.003273000 | -0.026677000 |
| 1                                              | -2.058766000 | -1.404149000 | 2.286806000  | 1                                              | 1.005626000  | -2.566315000 | -1.017810000 |
| 1                                              | -2.144385000 | -1.740897000 | 2.951943000  | 1                                              | 0.895239000  | -3.235126000 | -1.337671000 |
| 1                                              | -4.143922000 | 0.143759000  | 1.337499000  | 1                                              | 3.428932000  | -1.242065000 | -1.752052000 |
| 1                                              | -4.804822000 | 0.219172000  | 1.689450000  | 1                                              | 3.851382000  | -1.663105000 | -2.209632000 |
| 1                                              | -4.170801000 | -2.516547000 | 0.049513000  | 1                                              | 3.552181000  | -2.732291000 | 0.997550000  |
| 1                                              | -3.653289000 | -1.970974000 | 0.038178000  | 1                                              | 3.231969000  | -2.110576000 | 0.721464000  |
| 1                                              | -4.870762000 | 0.223983000  | -1.599973000 | 1                                              | 5.290361000  | 0.159672000  | 0.342862000  |
| 1                                              | -4.206224000 | 0.148968000  | -1.254370000 | 1                                              | 4.550662000  | 0.070394000  | 0.235173000  |
| 1                                              | -1.045358000 | -2.800795000 | -0.041596000 | 1                                              | 0.714876000  | -1.786785000 | 2.049897000  |
| 1                                              | -0.926972000 | -3.534880000 | -0.134541000 | 1                                              | 0.513129000  | -2.293262000 | 2.563460000  |
| 1                                              | -3.615746000 | 2.824610000  | 0.104452000  | 1                                              | 3.761243000  | 1.820958000  | -2.142850000 |
| 1                                              | -3.282066000 | 2.153115000  | 0.046037000  | 1                                              | 3.348887000  | 1.388548000  | -1.686491000 |
| 1                                              | -2.316257000 | -1.712631000 | -2.942764000 | 1                                              | 3.108693000  | -0.153824000 | 3.092234000  |
| 1                                              | -2.216360000 | -1.372084000 | -2.281126000 | 1                                              | 2.969786000  | -0.061619000 | 2.359608000  |
| 1                                              | -1.914856000 | 1.438406000  | 2.237758000  | 1                                              | 1.061120000  | 0.077138000  | -2.769602000 |
| 1                                              | -1.989925000 | 1.782963000  | 2.900045000  | 1                                              | 0.944185000  | 0.176653000  | -3.503313000 |
| 1                                              | -2.021517000 | 1.457528000  | -2.249491000 | 1                                              | 3.105070000  | 2.142293000  | 0.844304000  |
| 1                                              | -2.045665000 | 1.973791000  | -2.793223000 | 1                                              | 3.411630000  | 2.766731000  | 1.128949000  |
| 1                                              | -0.140351000 | 3.312975000  | -0.040684000 | 1                                              | 0.466481000  | 2.114450000  | 2.690892000  |
| 1                                              | -0.652862000 | 2.768040000  | -0.035426000 | 1                                              | 0.673103000  | 1.614973000  | 2.172616000  |
| 1                                              | 5.543868000  | -0.011938000 | 0.003424000  | 1                                              | 0.557199000  | 3.281632000  | -0.989890000 |
|                                                |              |              |              | 1                                              | 0.872516000  | 2.612981000  | -0.867673000 |
|                                                |              |              |              | 1                                              | -5.519098000 | -0.005643000 | 0.003372000  |
| <b>C<sub>6</sub>H<sub>25</sub><sup>-</sup></b> |              |              |              | <b>C<sub>6</sub>H<sub>27</sub><sup>-</sup></b> |              |              |              |
| SCF Energy = -243.19881 a. u.                  |              |              |              | SCF Energy = -244.37181 a. u.                  |              |              |              |
| 6                                              | -4.493303000 | -0.145374000 | -0.001981000 | 6                                              | 4.413770000  | -0.133266000 | -0.081434000 |
| 6                                              | -3.273093000 | -0.116877000 | 0.003480000  | 6                                              | 3.193701000  | -0.129578000 | -0.066140000 |
| 6                                              | -1.929047000 | -0.087389000 | 0.009175000  | 6                                              | 1.849663000  | -0.117924000 | -0.048682000 |
| 1                                              | -5.553321000 | -0.168847000 | -0.007230000 | 1                                              | 5.474090000  | -0.138626000 | -0.094344000 |
| 6                                              | -0.696442000 | -0.058925000 | 0.014874000  | 6                                              | 0.617102000  | -0.096867000 | -0.031786000 |
| 6                                              | 0.645338000  | -0.025169000 | 0.018074000  | 6                                              | -0.724352000 | -0.072711000 | -0.011226000 |
| 6                                              | 1.902949000  | -0.015067000 | 0.021568000  | 6                                              | -1.981409000 | -0.027783000 | -0.002685000 |
| 1                                              | 3.434701000  | -1.759602000 | -1.229963000 | 1                                              | -3.384796000 | 1.042541000  | -1.943150000 |
| 1                                              | 3.857491000  | -2.216433000 | -1.650394000 | 1                                              | -3.730874000 | 1.350573000  | -2.534749000 |
| 1                                              | 4.527851000  | 0.234347000  | -0.043449000 | 1                                              | -4.609785000 | -0.040684000 | 0.073306000  |
| 1                                              | 5.267678000  | 0.339338000  | -0.132916000 | 1                                              | -5.362173000 | -0.052406000 | 0.096241000  |
| 1                                              | 3.898587000  | -2.191333000 | 1.668001000  | 1                                              | -3.660987000 | 2.870038000  | 0.374437000  |
| 1                                              | 3.472245000  | -1.735895000 | 1.249436000  | 1                                              | -3.317268000 | 2.207210000  | 0.289647000  |
| 1                                              | 3.620833000  | 0.798634000  | 2.754993000  | 1                                              | -3.629957000 | 0.646513000  | 2.834278000  |
| 1                                              | 3.285840000  | 0.658699000  | 2.096504000  | 1                                              | -3.298215000 | 0.486360000  | 2.179047000  |
| 1                                              | 1.084537000  | -2.772759000 | 0.041291000  | 1                                              | -0.952272000 | 2.350913000  | -1.275760000 |
| 1                                              | 0.972907000  | -3.507728000 | -0.052791000 | 1                                              | -0.766987000 | 2.990843000  | -1.619072000 |
| 1                                              | 3.188992000  | 3.011489000  | -0.146812000 | 1                                              | -3.314127000 | -2.674750000 | 1.422895000  |
| 1                                              | 2.868931000  | 2.334525000  | -0.073385000 | 1                                              | -3.047176000 | -2.057031000 | 1.086054000  |
| 1                                              | 0.961613000  | -1.525995000 | 3.166346000  | 1                                              | -0.737051000 | 2.686489000  | 2.089467000  |
| 1                                              | 1.064021000  | -1.201151000 | 2.498750000  | 1                                              | -0.930007000 | 2.122207000  | 1.635669000  |
| 1                                              | 3.194711000  | 0.599772000  | -2.142463000 | 1                                              | -3.397743000 | -1.498573000 | -1.612014000 |
| 1                                              | 3.521484000  | 0.729022000  | -2.806892000 | 1                                              | -3.757485000 | -1.939871000 | -2.102804000 |
| 1                                              | 0.842877000  | 1.644539000  | 2.247322000  | 1                                              | -0.898318000 | -0.472967000 | 2.741720000  |
| 1                                              | 0.640425000  | 2.146001000  | 2.765246000  | 1                                              | -0.675761000 | -0.597252000 | 3.445992000  |
| 1                                              | 0.751065000  | 1.589097000  | -2.249685000 | 1                                              | -1.004158000 | -2.559684000 | -1.241073000 |
| 1                                              | 0.542867000  | 2.084914000  | -2.770475000 | 1                                              | -0.812434000 | -3.215619000 | -1.547613000 |

|                                                |              |              |              |                                                |              |              |              |
|------------------------------------------------|--------------|--------------|--------------|------------------------------------------------|--------------|--------------|--------------|
| 1                                              | 0.881623000  | -1.584051000 | -3.110045000 | 1                                              | 1.711951000  | 2.761231000  | 0.211081000  |
| 1                                              | 0.991750000  | -1.258122000 | -2.444431000 | 1                                              | 2.049047000  | 3.425904000  | 0.265172000  |
| 1                                              | -0.294367000 | 3.555106000  | -0.046684000 | 1                                              | -0.897971000 | -0.226758000 | -3.483943000 |
| 1                                              | 0.036244000  | 2.889239000  | 0.028592000  | 1                                              | -1.054088000 | -0.170102000 | -2.753202000 |
| <b>C<sub>6</sub>H<sub>29</sub><sup>-</sup></b> |              |              |              | <b>C<sub>6</sub>H<sub>31</sub><sup>-</sup></b> |              |              |              |
| SCF Energy = -245.54684 a. u.                  |              |              |              | SCF Energy = -246.72146 a. u.                  |              |              |              |
| 6                                              | 4.487871000  | -0.174741000 | -0.058872000 | 6                                              | 4.556083000  | 0.019111000  | -0.009211000 |
| 6                                              | 3.268040000  | -0.144698000 | -0.039315000 | 6                                              | 3.335868000  | 0.016470000  | -0.000959000 |
| 6                                              | 1.924290000  | -0.111301000 | -0.018908000 | 6                                              | 1.991351000  | 0.014868000  | 0.006771000  |
| 6                                              | 0.692657000  | -0.069980000 | -0.004508000 | 6                                              | 0.759425000  | 0.011004000  | 0.009825000  |
| 6                                              | -0.649265000 | -0.026754000 | 0.013867000  | 6                                              | -0.584424000 | 0.009174000  | 0.011873000  |
| 6                                              | -1.907259000 | -0.002085000 | 0.010439000  | 6                                              | -1.843450000 | 0.009424000  | 0.015990000  |
| 1                                              | -1.891345000 | 2.641809000  | -0.469912000 | 1                                              | -2.526987000 | -2.515055000 | -0.151189000 |
| 1                                              | -1.989243000 | 3.376549000  | -0.586728000 | 1                                              | -2.833005000 | -3.194617000 | -0.245034000 |
| 1                                              | -3.675271000 | 1.081198000  | -1.654076000 | 1                                              | -4.204966000 | -0.814540000 | 1.112898000  |
| 1                                              | -4.171447000 | 1.327816000  | -2.161419000 | 1                                              | -4.823405000 | -1.101923000 | 1.427599000  |
| 1                                              | -4.749632000 | 1.641098000  | 1.047734000  | 1                                              | -4.747796000 | -0.864568000 | -1.771256000 |
| 1                                              | -4.136515000 | 1.303202000  | 0.774800000  | 1                                              | -4.217711000 | -0.664266000 | -1.279461000 |
| 1                                              | -5.111037000 | -1.192630000 | -0.305827000 | 1                                              | -4.914307000 | 1.707232000  | 0.014186000  |
| 1                                              | -4.436648000 | -0.869898000 | -0.226655000 | 1                                              | -4.249101000 | 1.361113000  | 0.052167000  |
| 1                                              | -2.146218000 | 1.574077000  | 2.192677000  | 1                                              | -2.087016000 | -1.231967000 | -2.394429000 |
| 1                                              | -2.219252000 | 1.921527000  | 2.853379000  | 1                                              | -2.157436000 | -1.566066000 | -3.062006000 |
| 1                                              | -3.130456000 | -1.538538000 | -2.764961000 | 1                                              | -2.936134000 | 1.402260000  | 2.858799000  |
| 1                                              | -2.866595000 | -1.208835000 | -2.144203000 | 1                                              | -2.661964000 | 1.093850000  | 2.230748000  |
| 1                                              | -3.294439000 | -1.302245000 | 2.702797000  | 1                                              | -2.849194000 | 1.831155000  | -2.602074000 |
| 1                                              | -2.995121000 | -0.994188000 | 2.085067000  | 1                                              | -2.646628000 | 1.335382000  | -2.075142000 |
| 1                                              | -1.015695000 | 0.661396000  | -2.645539000 | 1                                              | -2.179173000 | -1.481251000 | 2.282326000  |
| 1                                              | -0.901637000 | 0.975150000  | -3.316585000 | 1                                              | -2.196417000 | -2.004097000 | 2.818827000  |
| 1                                              | -2.656596000 | -2.560052000 | -0.055839000 | 1                                              | -2.231652000 | 2.708800000  | 0.152934000  |
| 1                                              | -2.776532000 | -3.294626000 | -0.151224000 | 1                                              | -2.341122000 | 3.442165000  | 0.263302000  |
| 1                                              | -0.268021000 | -0.157286000 | 2.800856000  | 1                                              | -0.068615000 | -0.121833000 | 2.796909000  |
| 1                                              | -0.136853000 | -0.464903000 | 3.469820000  | 1                                              | 0.263624000  | -0.052560000 | 3.463295000  |
| 1                                              | 0.723621000  | 2.912180000  | 1.698883000  | 1                                              | -0.007568000 | 0.245234000  | -2.754861000 |
| 1                                              | 0.218929000  | 2.397365000  | 1.502773000  | 1                                              | 0.320434000  | 0.340322000  | -3.420146000 |
| 1                                              | -0.143862000 | -3.101206000 | 1.586039000  | 1                                              | 0.541525000  | -2.917069000 | -1.804109000 |
| 1                                              | -0.442661000 | -2.488187000 | 1.278042000  | 1                                              | 0.041707000  | -2.403797000 | -1.591984000 |
| 1                                              | -0.071974000 | -2.684786000 | -2.066647000 | 1                                              | 0.242503000  | 3.092998000  | -1.580922000 |
| 1                                              | -0.492052000 | -2.235633000 | -1.640353000 | 1                                              | -0.062850000 | 2.483984000  | -1.272776000 |
| 1                                              | 1.313280000  | 3.134767000  | -1.728371000 | 1                                              | 0.317336000  | 2.793284000  | 1.998817000  |
| 1                                              | 1.017559000  | 2.524526000  | -1.415635000 | 1                                              | -0.105663000 | 2.347579000  | 1.573094000  |
| 1                                              | 5.547709000  | -0.202292000 | -0.075110000 | 1                                              | 0.370442000  | -3.183771000 | 1.525151000  |
| <b>C<sub>6</sub>H<sub>33</sub><sup>-</sup></b> |              |              |              | <b>C<sub>6</sub>H<sub>35</sub><sup>-</sup></b> |              |              |              |
| SCF Energy = -247.89513 a. u.                  |              |              |              | SCF Energy = -249.06976 a. u.                  |              |              |              |
| 6                                              | -4.471266000 | -0.304420000 | 0.015127000  | 6                                              | -4.381549000 | -0.526376000 | -0.002468000 |
| 6                                              | -3.253437000 | -0.233695000 | 0.006106000  | 6                                              | -3.166648000 | -0.419262000 | -0.011239000 |
| 6                                              | -1.911442000 | -0.151292000 | -0.003742000 | 6                                              | -1.828252000 | -0.289583000 | -0.020035000 |
| 6                                              | -0.680849000 | -0.087990000 | -0.008200000 | 6                                              | -0.600312000 | -0.182489000 | -0.023858000 |
| 6                                              | 0.661592000  | -0.029413000 | -0.011429000 | 6                                              | 0.739346000  | -0.081670000 | -0.026163000 |

|                                                |              |              |              |                                                |              |              |              |
|------------------------------------------------|--------------|--------------|--------------|------------------------------------------------|--------------|--------------|--------------|
| 6                                              | 1.919851000  | 0.017649000  | -0.018209000 | 6                                              | 1.995618000  | 0.003259000  | -0.026404000 |
| 1                                              | 2.662167000  | -2.503201000 | 0.011756000  | 1                                              | 2.819726000  | -2.150910000 | 1.211516000  |
| 1                                              | 2.974711000  | -3.181632000 | 0.089840000  | 1                                              | 3.091772000  | -2.768964000 | 1.540489000  |
| 1                                              | 4.309383000  | -0.701651000 | -1.137018000 | 1                                              | 4.462059000  | -1.059651000 | -0.629957000 |
| 1                                              | 4.930977000  | -0.974787000 | -1.458067000 | 1                                              | 5.123946000  | -1.390775000 | -0.756402000 |
| 1                                              | 4.837314000  | -0.893020000 | 1.739303000  | 1                                              | 4.879338000  | 0.108292000  | 2.019622000  |
| 1                                              | 4.306347000  | -0.684188000 | 1.252155000  | 1                                              | 4.340031000  | 0.099863000  | 1.498346000  |
| 1                                              | 4.968532000  | 1.765185000  | 0.094763000  | 1                                              | 4.997115000  | 1.710364000  | -0.692277000 |
| 1                                              | 4.304823000  | 1.419795000  | 0.032853000  | 1                                              | 4.340363000  | 1.367760000  | -0.570365000 |
| 1                                              | 2.181382000  | -1.361920000 | 2.316567000  | 1                                              | 2.255273000  | -0.091120000 | 2.717237000  |
| 1                                              | 2.252634000  | -1.700778000 | 2.981554000  | 1                                              | 2.162062000  | 0.000567000  | 3.455031000  |
| 1                                              | 3.001294000  | 1.555775000  | -2.782536000 | 1                                              | 3.206197000  | 0.202913000  | -3.133258000 |
| 1                                              | 2.736118000  | 1.230198000  | -2.159165000 | 1                                              | 2.891039000  | 0.125301000  | -2.455407000 |
| 1                                              | 2.876178000  | 1.706423000  | 2.707149000  | 1                                              | 2.756700000  | 2.787438000  | 1.665378000  |
| 1                                              | 2.678429000  | 1.218684000  | 2.171183000  | 1                                              | 2.636363000  | 2.127537000  | 1.326839000  |
| 1                                              | 2.323520000  | -1.347301000 | -2.369083000 | 1                                              | 2.527106000  | -2.289407000 | -1.403069000 |
| 1                                              | 2.348361000  | -1.863569000 | -2.911491000 | 1                                              | 2.621556000  | -2.951822000 | -1.741093000 |
| 1                                              | 2.256406000  | 2.714734000  | 0.010053000  | 1                                              | 2.268177000  | 2.396288000  | -1.293284000 |
| 1                                              | 2.360950000  | 3.450434000  | -0.089890000 | 1                                              | 2.342419000  | 3.061626000  | -1.630860000 |
| 1                                              | 0.176853000  | -0.014718000 | -2.790049000 | 1                                              | 0.380800000  | -1.363457000 | -2.514131000 |
| 1                                              | -0.153504000 | 0.061416000  | -3.456725000 | 1                                              | 0.079284000  | -1.667282000 | -3.127334000 |
| 1                                              | 0.074368000  | 0.024431000  | 2.760341000  | 1                                              | 0.034792000  | 1.262838000  | 2.344177000  |
| 1                                              | -0.256572000 | 0.103357000  | 3.426293000  | 1                                              | -0.199703000 | 1.751829000  | 2.859033000  |
| 1                                              | -0.395581000 | -3.081181000 | 1.635251000  | 1                                              | -0.205415000 | -2.065216000 | 2.871067000  |
| 1                                              | 0.105900000  | -2.565203000 | 1.434157000  | 1                                              | 0.217708000  | -1.635743000 | 2.429910000  |
| 1                                              | -0.192162000 | 2.929487000  | 1.722339000  | 1                                              | -0.273061000 | 3.297743000  | 0.128715000  |
| 1                                              | 0.103093000  | 2.320577000  | 1.403629000  | 1                                              | 0.057924000  | 2.631350000  | 0.050486000  |
| 1                                              | -0.279800000 | 2.802254000  | -1.828705000 | 1                                              | -0.246482000 | 1.522863000  | -2.945872000 |
| 1                                              | 0.148742000  | 2.355901000  | -1.408826000 | 1                                              | 0.251017000  | 1.306997000  | -2.430991000 |
| 1                                              | -0.191580000 | -3.181934000 | -1.708480000 | 1                                              | 0.018371000  | -3.620027000 | -0.034096000 |
| 1                                              | 0.122091000  | -2.569621000 | -1.416518000 | 1                                              | 0.349467000  | -2.954454000 | -0.113371000 |
| 1                                              | -3.075035000 | 3.300683000  | -0.084620000 | 1                                              | -3.072297000 | 2.717984000  | 1.673560000  |
| 1                                              | -2.553271000 | 2.767138000  | -0.089925000 | 1                                              | -2.569164000 | 2.213360000  | 1.451100000  |
| 1                                              | -5.529766000 | -0.366799000 | 0.023995000  | 1                                              | -3.076226000 | 2.711820000  | -1.671506000 |
|                                                |              |              |              | 1                                              | -2.579859000 | 2.202640000  | -1.443830000 |
|                                                |              |              |              | 1                                              | -5.437615000 | -0.621820000 | 0.005593000  |
| <b>C<sub>6</sub>H<sub>37</sub><sup>-</sup></b> |              |              |              | <b>C<sub>6</sub>H<sub>39</sub><sup>-</sup></b> |              |              |              |
| SCF Energy = -250.24445 a. u.                  |              |              |              | SCF Energy = -251.41885 a. u.                  |              |              |              |
| 6                                              | 4.310741000  | -0.152023000 | -0.539312000 | 6                                              | 4.258311000  | -0.003143000 | -0.483297000 |
| 6                                              | 3.096610000  | -0.119830000 | -0.430198000 | 6                                              | 3.042852000  | -0.012213000 | -0.388168000 |
| 6                                              | 1.759245000  | -0.081546000 | -0.294915000 | 6                                              | 1.703294000  | -0.020596000 | -0.269350000 |
| 6                                              | 0.532233000  | -0.050249000 | -0.177747000 | 6                                              | 0.474099000  | -0.023376000 | -0.168815000 |
| 6                                              | -0.806068000 | -0.022769000 | -0.063459000 | 6                                              | -0.866061000 | -0.022928000 | -0.077733000 |
| 6                                              | -2.061061000 | -0.001768000 | 0.038109000  | 6                                              | -2.123080000 | -0.020964000 | -0.002646000 |
| 1                                              | -2.939343000 | -0.710073000 | -2.324797000 | 1                                              | -2.941048000 | 1.185825000  | -2.179228000 |
| 1                                              | -3.242903000 | -0.979597000 | -2.956773000 | 1                                              | -3.210374000 | 1.513758000  | -2.798920000 |
| 1                                              | -4.476973000 | -1.336569000 | -0.212492000 | 1                                              | -4.596156000 | -0.623406000 | -1.093729000 |
| 1                                              | -5.137829000 | -1.681037000 | -0.301489000 | 1                                              | -5.257115000 | -0.748870000 | -1.426594000 |
| 1                                              | -5.091849000 | 1.301634000  | -1.199516000 | 1                                              | -5.019553000 | 2.032581000  | 0.053383000  |
| 1                                              | -4.474929000 | 0.992068000  | -0.904910000 | 1                                              | -4.480455000 | 1.511267000  | 0.049745000  |
| 1                                              | -5.040473000 | 0.538786000  | 1.811750000  | 1                                              | -5.164067000 | -0.661521000 | 1.672746000  |
| 1                                              | -4.383769000 | 0.432065000  | 1.464033000  | 1                                              | -4.505650000 | -0.544597000 | 1.331986000  |
| 1                                              | -2.483484000 | 1.844110000  | -1.961536000 | 1                                              | -2.395239000 | 2.723420000  | -0.106144000 |
| 1                                              | -2.513304000 | 2.367494000  | -2.496981000 | 1                                              | -2.300961000 | 3.461076000  | -0.015011000 |

|                                                |              |              |              |                                                |              |              |              |
|------------------------------------------------|--------------|--------------|--------------|------------------------------------------------|--------------|--------------|--------------|
| 1                                              | -2.984526000 | -2.229503000 | 2.356512000  | 1                                              | -3.376004000 | -3.111788000 | 0.216640000  |
| 1                                              | -2.798014000 | -1.717960000 | 1.838895000  | 1                                              | -3.060698000 | -2.434247000 | 0.137473000  |
| 1                                              | -2.948711000 | 3.154207000  | 0.723380000  | 1                                              | -2.939057000 | 1.673238000  | 2.770264000  |
| 1                                              | -2.819807000 | 2.423370000  | 0.605936000  | 1                                              | -2.816591000 | 1.334338000  | 2.111068000  |
| 1                                              | -2.469377000 | -2.627101000 | -0.614238000 | 1                                              | -2.653609000 | -1.426781000 | -2.279523000 |
| 1                                              | -2.580168000 | -3.358006000 | -0.737580000 | 1                                              | -2.744912000 | -1.765750000 | -2.941828000 |
| 1                                              | -2.289072000 | 0.784375000  | 2.636091000  | 1                                              | -2.462423000 | -1.248087000 | 2.406171000  |
| 1                                              | -2.365902000 | 1.102329000  | 3.310630000  | 1                                              | -2.540093000 | -1.584051000 | 3.071848000  |
| 1                                              | -0.263095000 | -2.647704000 | 0.765905000  | 1                                              | -0.532812000 | -2.512291000 | -1.288565000 |
| 1                                              | 0.060969000  | -3.312600000 | 0.876300000  | 1                                              | -0.235131000 | -3.126348000 | -1.595020000 |
| 1                                              | -0.304097000 | 2.640628000  | -0.873987000 | 1                                              | -0.210141000 | 2.326182000  | 1.286330000  |
| 1                                              | 0.022762000  | 3.305362000  | -0.977192000 | 1                                              | 0.028136000  | 2.837117000  | 1.777794000  |
| 1                                              | -0.080478000 | 0.546065000  | -3.575795000 | 1                                              | 0.053430000  | 2.826446000  | -2.055816000 |
| 1                                              | -0.415816000 | 0.614372000  | -2.911396000 | 1                                              | -0.371415000 | 2.388666000  | -1.624338000 |
| 1                                              | 0.136753000  | 2.625886000  | 2.083169000  | 1                                              | 0.105047000  | 0.104945000  | 3.307551000  |
| 1                                              | -0.160937000 | 2.024107000  | 1.753372000  | 1                                              | -0.226584000 | 0.028114000  | 2.641298000  |
| 1                                              | 0.276805000  | -0.898196000 | 3.098666000  | 1                                              | 0.043379000  | -2.902709000 | 1.597728000  |
| 1                                              | -0.223430000 | -0.695583000 | 2.580902000  | 1                                              | -0.447250000 | -2.386457000 | 1.368562000  |
| 1                                              | -0.133182000 | -2.602663000 | -2.577249000 | 1                                              | -0.132702000 | -0.072410000 | -3.594887000 |
| 1                                              | -0.358537000 | -2.106951000 | -2.065527000 | 1                                              | -0.464359000 | -0.150714000 | -2.929423000 |
| 1                                              | 2.881197000  | 3.275123000  | 0.423921000  | 1                                              | 2.935975000  | 1.645456000  | 2.740673000  |
| 1                                              | 2.354640000  | 2.746316000  | 0.407681000  | 1                                              | 2.435271000  | 1.428524000  | 2.231071000  |
| 1                                              | 2.897401000  | -2.552694000 | 2.215480000  | 1                                              | 2.703230000  | -3.491595000 | -0.233766000 |
| 1                                              | 2.470076000  | -2.122672000 | 1.779931000  | 1                                              | 2.180465000  | -2.958858000 | -0.240685000 |
| 1                                              | 3.012099000  | 0.904530000  | 2.960905000  | 1                                              | 2.915981000  | -1.692149000 | 2.720218000  |
| 1                                              | 2.511152000  | 0.707724000  | 2.443291000  | 1                                              | 2.420888000  | -1.460596000 | 2.211286000  |
| 1                                              | 5.365958000  | -0.182525000 | -0.640156000 | 1                                              | 2.340430000  | 2.915079000  | -0.234698000 |
|                                                |              |              |              | 1                                              | 2.670488000  | 3.580264000  | -0.156379000 |
|                                                |              |              |              | 1                                              | 5.315191000  | 0.006252000  | -0.569222000 |
| <b>C<sub>6</sub>H<sub>41</sub><sup>-</sup></b> |              |              |              | <b>C<sub>6</sub>H<sub>43</sub><sup>-</sup></b> |              |              |              |
| SCF Energy = -252.59347 a. u.                  |              |              |              | SCF Energy = -253.76873 a. u.                  |              |              |              |
| 6                                              | -4.209922000 | 0.030698000  | -0.259038000 | 6                                              | -4.168120000 | 0.005430000  | 0.009918000  |
| 6                                              | -2.991680000 | 0.024021000  | -0.213674000 | 6                                              | -2.949178000 | 0.000051000  | 0.008938000  |
| 6                                              | -1.647955000 | 0.016245000  | -0.157036000 | 6                                              | -1.604234000 | -0.000571000 | 0.008101000  |
| 6                                              | -0.415472000 | 0.010246000  | -0.106107000 | 6                                              | -0.370084000 | 0.005391000  | 0.006193000  |
| 6                                              | 0.926770000  | 0.003766000  | -0.054975000 | 6                                              | 0.972998000  | 0.012856000  | 0.005143000  |
| 6                                              | 2.185266000  | -0.000349000 | -0.010225000 | 6                                              | 2.232410000  | 0.020644000  | 0.003825000  |
| 1                                              | 3.075899000  | 0.104995000  | -2.460650000 | 1                                              | 3.036696000  | 0.547540000  | -2.406325000 |
| 1                                              | 3.202419000  | 0.201338000  | -3.194843000 | 1                                              | 3.165148000  | 0.664350000  | -3.137395000 |
| 1                                              | 4.620400000  | 1.174813000  | -0.592763000 | 1                                              | 4.649628000  | 1.354151000  | -0.399705000 |
| 1                                              | 5.281962000  | 1.505265000  | -0.721802000 | 1                                              | 5.309465000  | 1.697763000  | -0.497246000 |
| 1                                              | 5.140525000  | -1.712881000 | -0.877797000 | 1                                              | 5.251915000  | -1.298888000 | -1.303448000 |
| 1                                              | 4.604739000  | -1.230170000 | -0.671197000 | 1                                              | 4.635832000  | -0.999185000 | -0.997821000 |
| 1                                              | 5.124647000  | -0.128323000 | 1.972764000  | 1                                              | 5.321077000  | -0.460304000 | 1.689253000  |
| 1                                              | 4.580024000  | -0.111531000 | 1.457435000  | 1                                              | 4.661466000  | -0.362149000 | 1.345610000  |
| 1                                              | 2.510330000  | -2.269964000 | -1.469432000 | 1                                              | 2.598029000  | -1.940806000 | -1.888452000 |
| 1                                              | 2.582289000  | -2.931790000 | -1.814154000 | 1                                              | 2.680882000  | -2.596494000 | -2.241437000 |
| 1                                              | 3.269009000  | 2.674470000  | 1.686399000  | 1                                              | 3.258917000  | 2.327741000  | 2.220892000  |
| 1                                              | 3.011043000  | 2.055510000  | 1.347347000  | 1                                              | 3.063040000  | 1.812302000  | 1.711040000  |
| 1                                              | 3.059250000  | -2.887467000 | 1.477464000  | 1                                              | 3.210225000  | -3.042556000 | 0.985227000  |
| 1                                              | 2.934744000  | -2.225329000 | 1.145473000  | 1                                              | 3.079486000  | -2.370700000 | 0.676301000  |
| 1                                              | 2.634788000  | 2.392308000  | -1.251041000 | 1                                              | 2.620801000  | 2.593391000  | -0.796435000 |
| 1                                              | 2.722508000  | 3.057956000  | -1.584146000 | 1                                              | 2.717207000  | 3.265866000  | -1.113051000 |
| 1                                              | 2.456197000  | -0.105464000 | 2.704269000  | 1                                              | 2.637145000  | -0.637440000 | 2.641134000  |

|                                                |              |              |              |                                                |              |              |              |
|------------------------------------------------|--------------|--------------|--------------|------------------------------------------------|--------------|--------------|--------------|
| 1                                              | 2.554792000  | -0.205945000 | 3.440517000  | 1                                              | 2.744045000  | -0.754152000 | 3.373562000  |
| 1                                              | 0.485501000  | 2.760913000  | 0.110684000  | 1                                              | 0.523726000  | 2.668978000  | 0.725707000  |
| 1                                              | 0.154574000  | 3.427060000  | 0.190807000  | 1                                              | 0.192241000  | 3.329679000  | 0.839061000  |
| 1                                              | 0.383714000  | -2.751354000 | -0.104792000 | 1                                              | 0.489718000  | -2.678294000 | -0.599328000 |
| 1                                              | 0.051620000  | -3.417668000 | -0.031837000 | 1                                              | 0.165869000  | -3.346574000 | -0.690206000 |
| 1                                              | -0.049965000 | -1.528943000 | -3.146244000 | 1                                              | 0.082869000  | -0.925345000 | -3.206478000 |
| 1                                              | 0.454976000  | -1.328800000 | -2.633149000 | 1                                              | 0.588949000  | -0.730870000 | -2.691120000 |
| 1                                              | -0.059430000 | -1.845569000 | 2.724247000  | 1                                              | 0.273799000  | -2.439344000 | 2.440776000  |
| 1                                              | 0.366905000  | -1.422950000 | 2.277940000  | 1                                              | 0.504149000  | -1.935425000 | 1.938346000  |
| 1                                              | -0.003635000 | 1.687758000  | 2.836556000  | 1                                              | 0.101020000  | 1.058437000  | 3.195360000  |
| 1                                              | 0.421449000  | 1.266852000  | 2.387382000  | 1                                              | 0.580367000  | 0.838070000  | 2.665146000  |
| 1                                              | 0.180224000  | 1.805168000  | -3.088242000 | 1                                              | 0.199100000  | 2.186919000  | -2.622927000 |
| 1                                              | 0.492954000  | 1.512217000  | -2.475706000 | 1                                              | 0.495698000  | 1.858584000  | -2.019631000 |
| 1                                              | -2.722221000 | -3.067991000 | 1.542338000  | 1                                              | -2.636545000 | -3.333304000 | 1.032953000  |
| 1                                              | -2.217502000 | -2.560705000 | 1.329601000  | 1                                              | -2.131865000 | -2.820436000 | 0.833476000  |
| 1                                              | -2.636612000 | 3.018812000  | 1.673266000  | 1                                              | -2.518880000 | 2.714992000  | 2.321108000  |
| 1                                              | -2.131487000 | 2.515738000  | 1.451459000  | 1                                              | -2.221360000 | 2.114001000  | 1.992267000  |
| 1                                              | -2.712764000 | -0.059817000 | 3.278382000  | 1                                              | -2.503725000 | -0.789739000 | 3.456429000  |
| 1                                              | -2.188994000 | -0.053242000 | 2.746416000  | 1                                              | -2.178646000 | -0.688483000 | 2.791726000  |
| 1                                              | -2.279786000 | -2.564735000 | -1.544286000 | 1                                              | -2.180104000 | -2.122695000 | -1.984233000 |
| 1                                              | -2.575900000 | -3.175267000 | -1.855935000 | 1                                              | -2.600013000 | -2.564961000 | -2.414690000 |
| 1                                              | -2.446250000 | 3.246576000  | -1.729978000 | 1                                              | -2.071007000 | 0.674403000  | -2.824521000 |
| 1                                              | -2.145535000 | 2.634470000  | -1.425643000 | 1                                              | -2.594524000 | 0.695649000  | -3.356603000 |
| 1                                              | -5.269440000 | 0.035922000  | -0.300783000 | 1                                              | -2.486510000 | 3.389917000  | -1.116373000 |
|                                                |              |              |              | 1                                              | -2.169641000 | 2.775193000  | -0.834105000 |
|                                                |              |              |              | 1                                              | -5.228448000 | 0.007402000  | 0.013454000  |
| <b>C<sub>6</sub>H<sub>45</sub><sup>-</sup></b> |              |              |              | <b>C<sub>6</sub>H<sub>47</sub><sup>-</sup></b> |              |              |              |
| SCF Energy = -254.94210 a. u.                  |              |              |              | SCF Energy = -256.11651 a. u.                  |              |              |              |
| 6                                              | -4.014797000 | -0.354814000 | 0.020971000  | 6                                              | -3.878812000 | 0.544173000  | -0.084480000 |
| 6                                              | -2.798629000 | -0.269102000 | 0.015108000  | 6                                              | -2.666707000 | 0.412038000  | -0.068909000 |
| 6                                              | -1.457195000 | -0.174209000 | 0.009238000  | 6                                              | -1.329967000 | 0.266954000  | -0.050997000 |
| 6                                              | -0.225849000 | -0.090193000 | 0.006169000  | 6                                              | -0.103151000 | 0.133955000  | -0.029694000 |
| 6                                              | 1.113444000  | 0.004291000  | 0.007120000  | 6                                              | 1.231215000  | -0.011023000 | -0.005866000 |
| 6                                              | 2.369742000  | 0.093478000  | 0.013330000  | 6                                              | 2.483120000  | -0.147250000 | 0.016446000  |
| 1                                              | 3.035798000  | 2.315334000  | 1.189116000  | 1                                              | 3.000434000  | -2.638892000 | 0.487390000  |
| 1                                              | 3.142811000  | 2.981546000  | 1.519484000  | 1                                              | 3.114792000  | -3.371797000 | 0.606977000  |
| 1                                              | 4.766923000  | 0.317004000  | 1.407606000  | 1                                              | 4.802093000  | -1.333498000 | -0.957744000 |
| 1                                              | 5.429715000  | 0.388738000  | 1.752117000  | 1                                              | 5.415898000  | -1.651442000 | -1.249639000 |
| 1                                              | 5.210011000  | 1.996110000  | -0.917127000 | 1                                              | 5.310317000  | -1.100597000 | 1.907255000  |
| 1                                              | 4.683681000  | 1.503115000  | -0.711106000 | 1                                              | 4.784239000  | -0.893316000 | 1.414349000  |
| 1                                              | 5.496327000  | -1.199585000 | -0.975872000 | 1                                              | 5.723038000  | 1.265387000  | -0.199611000 |
| 1                                              | 4.873154000  | -0.892692000 | -0.692003000 | 1                                              | 5.054103000  | 0.933371000  | -0.127189000 |
| 1                                              | 2.547988000  | 2.465164000  | -1.379272000 | 1                                              | 2.691120000  | -1.143057000 | 2.575771000  |
| 1                                              | 2.546536000  | 3.009077000  | -1.894316000 | 1                                              | 2.593564000  | -1.277661000 | 3.306394000  |
| 1                                              | 3.663028000  | -2.574493000 | 1.595125000  | 1                                              | 3.801291000  | 0.692322000  | -2.957056000 |
| 1                                              | 3.378715000  | -1.958978000 | 1.271736000  | 1                                              | 3.484888000  | 0.555070000  | -2.289777000 |
| 1                                              | 3.292992000  | 0.030731000  | -3.209372000 | 1                                              | 3.647634000  | 1.807834000  | 2.488906000  |
| 1                                              | 3.165898000  | 0.124811000  | -2.475177000 | 1                                              | 3.432910000  | 1.311376000  | 1.968104000  |
| 1                                              | 2.731923000  | 0.128993000  | 2.727040000  | 1                                              | 2.731928000  | -1.915868000 | -2.055992000 |
| 1                                              | 2.841217000  | 0.226609000  | 3.461928000  | 1                                              | 2.747833000  | -2.440343000 | -2.590702000 |
| 1                                              | 2.936303000  | -2.209531000 | -1.327333000 | 1                                              | 3.190731000  | 2.445912000  | -0.425426000 |
| 1                                              | 3.025947000  | -2.875918000 | -1.658822000 | 1                                              | 3.310157000  | 3.176504000  | -0.542834000 |
| 1                                              | 0.721926000  | -1.470403000 | 2.347393000  | 1                                              | 0.774325000  | -0.356236000 | -2.736631000 |
| 1                                              | 0.428411000  | -1.785873000 | 2.958731000  | 1                                              | 0.441901000  | -0.437763000 | -3.401872000 |



|                                                |              |              |              |                                                |              |              |              |
|------------------------------------------------|--------------|--------------|--------------|------------------------------------------------|--------------|--------------|--------------|
| 1                                              | 0.501800000  | 1.274906000  | -2.430762000 | 1                                              | 0.713721000  | 0.585327000  | 2.684268000  |
| 1                                              | 0.172444000  | 1.406682000  | -3.089316000 | 1                                              | 0.395330000  | 0.867128000  | 3.299642000  |
| 1                                              | -0.030524000 | 3.279206000  | 0.028574000  | 1                                              | -0.016058000 | -2.630048000 | 1.993865000  |
| 1                                              | 0.491497000  | 2.743799000  | 0.032996000  | 1                                              | 0.483585000  | -2.125233000 | 1.760365000  |
| 1                                              | 0.426197000  | -1.722803000 | -3.026546000 | 1                                              | 0.749885000  | 3.236542000  | 1.267006000  |
| 1                                              | 0.729170000  | -1.418511000 | -2.414280000 | 1                                              | 1.054946000  | 2.618948000  | 0.975502000  |
| 1                                              | 0.420731000  | -3.406839000 | 0.231938000  | 1                                              | 0.700276000  | 2.563816000  | -2.266772000 |
| 1                                              | 0.922861000  | -2.884088000 | 0.048663000  | 1                                              | 1.115496000  | 2.120053000  | -1.831035000 |
| 1                                              | 0.268241000  | 1.900795000  | 2.856151000  | 1                                              | 0.133809000  | -3.206518000 | -1.078403000 |
| 1                                              | 0.507438000  | 1.412436000  | 2.342588000  | 1                                              | 0.469890000  | -2.549328000 | -0.958156000 |
| 1                                              | -2.476843000 | -0.452411000 | -3.443913000 | 1                                              | -2.138899000 | 2.623493000  | 2.606373000  |
| 1                                              | -1.969025000 | -0.272368000 | -2.926851000 | 1                                              | -1.715340000 | 2.187782000  | 2.172560000  |
| 1                                              | -2.268811000 | -3.176219000 | 1.922173000  | 1                                              | -2.141697000 | 1.568447000  | -3.305840000 |
| 1                                              | -1.840540000 | -2.729920000 | 1.504011000  | 1                                              | -1.639563000 | 1.362228000  | -2.793128000 |
| 1                                              | -2.155570000 | -3.352176000 | -1.681434000 | 1                                              | -1.848744000 | 3.841556000  | -0.640647000 |
| 1                                              | -1.861233000 | -2.740426000 | -1.369901000 | 1                                              | -1.525499000 | 3.174801000  | -0.546613000 |
| 1                                              | -2.244359000 | 2.227569000  | -1.500183000 | 1                                              | -2.074837000 | -0.629810000 | 2.651438000  |
| 1                                              | -2.665590000 | 2.673838000  | -1.925823000 | 1                                              | -2.398353000 | -0.739766000 | 3.315687000  |
| 1                                              | -2.153636000 | 2.284477000  | 1.398299000  | 1                                              | -2.177379000 | -2.450360000 | 0.401647000  |
| 1                                              | -2.657538000 | 2.792964000  | 1.611146000  | 1                                              | -2.704647000 | -2.979334000 | 0.424668000  |
| 1                                              | -2.332757000 | -0.097500000 | 3.581125000  | 1                                              | -2.448693000 | -1.873559000 | -2.762161000 |
| 1                                              | -2.003062000 | -0.172396000 | 2.915065000  | 1                                              | -2.023980000 | -1.450192000 | -2.317168000 |
| 1                                              | -5.009467000 | 2.283808000  | -0.052263000 | 1                                              | -4.824240000 | -1.567303000 | 1.704001000  |
| 1                                              | -5.539310000 | 2.810596000  | -0.058649000 | 1                                              | -5.431641000 | -1.877005000 | 2.009355000  |
| 1                                              | -5.071716000 | -0.441890000 | 0.025701000  | 1                                              | -4.864578000 | -1.828909000 | -1.175378000 |
|                                                |              |              |              | 1                                              | -5.378166000 | -2.332884000 | -1.378033000 |
|                                                |              |              |              | 1                                              | -4.932006000 | 0.669748000  | -0.092721000 |
| <b>C<sub>6</sub>H<sub>49</sub><sup>-</sup></b> |              |              |              | <b>C<sub>6</sub>H<sub>51</sub><sup>-</sup></b> |              |              |              |
| SCF Energy = -257.29039 a. u.                  |              |              |              | SCF Energy = -258.46460 a. u.                  |              |              |              |
| 6                                              | -3.770215000 | -0.017045000 | 0.519316000  | 6                                              | -3.682048000 | 0.047532000  | -0.420169000 |
| 6                                              | -2.556398000 | -0.008678000 | 0.396969000  | 6                                              | -2.465996000 | 0.034226000  | -0.320149000 |
| 6                                              | -1.218823000 | 0.001410000  | 0.262308000  | 6                                              | -1.126176000 | 0.021588000  | -0.211996000 |
| 6                                              | 0.009073000  | 0.010301000  | 0.137442000  | 6                                              | 0.104153000  | 0.009086000  | -0.113702000 |
| 6                                              | 1.343223000  | 0.018703000  | -0.007640000 | 6                                              | 1.441226000  | -0.004021000 | -0.000779000 |
| 6                                              | 2.594296000  | 0.027212000  | -0.153574000 | 6                                              | 2.695998000  | -0.016381000 | 0.109212000  |
| 1                                              | 3.165193000  | -1.072920000 | -2.441933000 | 1                                              | 3.313338000  | -0.291873000 | 2.634659000  |
| 1                                              | 3.264935000  | -1.403365000 | -3.109178000 | 1                                              | 3.429175000  | -0.392462000 | 3.369814000  |
| 1                                              | 4.863658000  | 0.771457000  | -1.620683000 | 1                                              | 5.049262000  | -1.320127000 | 0.890564000  |
| 1                                              | 5.516311000  | 0.909318000  | -1.964006000 | 1                                              | 5.664551000  | -1.647788000 | 1.167658000  |
| 1                                              | 5.510091000  | -1.917454000 | -0.592074000 | 1                                              | 5.620580000  | 1.422066000  | 1.495260000  |
| 1                                              | 4.970635000  | -1.397526000 | -0.557844000 | 1                                              | 5.012115000  | 1.105187000  | 1.191721000  |
| 1                                              | 5.821037000  | 0.712831000  | 1.116931000  | 1                                              | 5.911676000  | 0.214589000  | -1.358450000 |
| 1                                              | 5.154682000  | 0.596422000  | 0.792236000  | 1                                              | 5.244234000  | 0.139845000  | -1.024063000 |
| 1                                              | 2.969362000  | -2.712954000 | -0.401454000 | 1                                              | 2.946090000  | 2.163605000  | 1.771782000  |
| 1                                              | 2.873861000  | -3.450286000 | -0.311072000 | 1                                              | 2.899286000  | 2.825782000  | 2.119236000  |
| 1                                              | 3.797556000  | 3.160856000  | -0.119351000 | 1                                              | 3.940550000  | -2.632266000 | -1.576780000 |
| 1                                              | 3.477950000  | 2.483138000  | -0.067004000 | 1                                              | 3.660407000  | -2.021511000 | -1.241095000 |
| 1                                              | 3.940503000  | -1.717712000 | 2.378918000  | 1                                              | 3.775327000  | 2.906777000  | -1.122848000 |
| 1                                              | 3.653003000  | -1.385379000 | 1.769861000  | 1                                              | 3.636556000  | 2.242203000  | -0.801768000 |
| 1                                              | 2.712749000  | 1.545673000  | -2.424410000 | 1                                              | 2.964506000  | -2.497922000 | 1.231850000  |
| 1                                              | 2.781436000  | 1.891097000  | -3.085952000 | 1                                              | 3.038151000  | -3.167322000 | 1.560494000  |
| 1                                              | 3.299217000  | 1.190549000  | 2.219574000  | 1                                              | 3.359401000  | 0.247283000  | -2.520260000 |
| 1                                              | 3.402294000  | 1.519640000  | 2.885038000  | 1                                              | 3.474063000  | 0.348586000  | -3.253962000 |
| 1                                              | 0.783316000  | 2.535745000  | -1.128079000 | 1                                              | 0.981926000  | -2.728952000 | -0.413450000 |

|   |              |              |              |   |              |              |              |
|---|--------------|--------------|--------------|---|--------------|--------------|--------------|
| 1 | 0.283531000  | 3.053129000  | -1.332343000 | 1 | 0.651607000  | -3.394718000 | -0.497948000 |
| 1 | 1.000559000  | -2.453049000 | 1.316417000  | 1 | 0.942670000  | 2.754310000  | 0.220146000  |
| 1 | 0.781619000  | -2.971036000 | 1.809312000  | 1 | 0.610052000  | 3.420334000  | 0.147358000  |
| 1 | 0.252601000  | -2.735263000 | -1.795085000 | 1 | 0.288409000  | 1.286274000  | 3.043269000  |
| 1 | 0.746762000  | -2.224388000 | -1.562516000 | 1 | 0.791934000  | 1.083530000  | 2.529146000  |
| 1 | 0.886408000  | -0.306266000 | 3.450582000  | 1 | 1.005464000  | 2.186358000  | -2.745869000 |
| 1 | 1.212637000  | -0.224504000 | 2.782384000  | 1 | 1.224888000  | 1.689951000  | -2.231429000 |
| 1 | 0.660382000  | 2.861906000  | 1.830194000  | 1 | 0.819389000  | -1.556546000 | -3.051193000 |
| 1 | 1.151564000  | 2.349782000  | 1.594167000  | 1 | 1.241157000  | -1.138082000 | -2.597185000 |
| 1 | 0.199306000  | 0.087729000  | -3.352123000 | 1 | 0.442129000  | -1.889889000 | 2.792671000  |
| 1 | 0.536369000  | 0.160203000  | -2.688312000 | 1 | 0.763671000  | -1.591429000 | 2.186813000  |
| 1 | -1.966428000 | -1.856604000 | 3.252794000  | 1 | -1.902852000 | 3.140436000  | -1.858651000 |
| 1 | -1.468706000 | -1.633978000 | 2.742843000  | 1 | -1.469914000 | 2.697317000  | -1.441781000 |
| 1 | -2.195512000 | 3.431555000  | 0.588257000  | 1 | -1.974978000 | -2.804570000 | -2.238526000 |
| 1 | -1.671622000 | 2.899772000  | 0.563558000  | 1 | -1.477955000 | -2.301608000 | -1.997886000 |
| 1 | -1.820840000 | 1.551401000  | 3.532788000  | 1 | -1.704180000 | 0.424934000  | -3.798304000 |
| 1 | -1.526831000 | 1.245359000  | 2.918135000  | 1 | -1.377558000 | 0.340034000  | -3.131965000 |
| 1 | -1.757036000 | -2.872728000 | 0.150624000  | 1 | -1.850327000 | 2.323166000  | 1.368902000  |
| 1 | -2.086118000 | -3.538535000 | 0.230571000  | 1 | -2.144101000 | 2.933147000  | 1.685307000  |
| 1 | -2.097076000 | -1.287787000 | -2.234356000 | 1 | -1.845401000 | -0.310447000 | 2.580660000  |
| 1 | -2.530759000 | -1.705464000 | -2.676603000 | 1 | -2.373142000 | -0.329822000 | 3.108902000  |
| 1 | -2.399960000 | 1.907938000  | -2.567538000 | 1 | -2.149930000 | -3.225137000 | 1.152031000  |
| 1 | -2.095807000 | 1.590063000  | -1.963481000 | 1 | -1.841578000 | -2.610865000 | 0.858913000  |
| 1 | -4.610406000 | -2.413056000 | -0.679112000 | 1 | -4.370284000 | 2.790163000  | -0.388598000 |
| 1 | -5.121468000 | -2.920930000 | -0.877951000 | 1 | -4.895030000 | 3.321959000  | -0.402440000 |
| 1 | -4.778551000 | 0.078121000  | -2.125320000 | 1 | -4.590501000 | 1.207610000  | 2.017832000  |
| 1 | -5.309610000 | 0.085507000  | -2.650879000 | 1 | -4.930149000 | 1.498267000  | 2.616750000  |
| 1 | -4.823965000 | -0.026233000 | 0.641679000  | 1 | -4.559940000 | -1.643923000 | 1.775633000  |
| 1 | -4.651925000 | 2.453017000  | -0.489091000 | 1 | -5.072042000 | -1.870047000 | 2.270488000  |
| 1 | -5.163843000 | 2.963782000  | -0.678032000 | 1 | -4.738722000 | 0.055779000  | -0.516530000 |
|   |              |              |              | 1 | -4.355060000 | -2.712719000 | -0.900617000 |
|   |              |              |              | 1 | -4.881872000 | -3.241645000 | -0.930769000 |

| $C_6H_{53}^-$                 |              |              |              | $C_6H_{55}^-$                 |              |              |              |
|-------------------------------|--------------|--------------|--------------|-------------------------------|--------------|--------------|--------------|
| SCF Energy = -259.63883 a. u. |              |              |              | SCF Energy = -260.81355 a. u. |              |              |              |
| 6                             | -3.589937000 | 0.006538000  | -0.208830000 | 6                             | 3.510785000  | 0.002060000  | 0.000078000  |
| 6                             | -2.370469000 | -0.005149000 | -0.158619000 | 6                             | 2.289916000  | 0.002052000  | -0.007385000 |
| 6                             | -1.027498000 | -0.015455000 | -0.102672000 | 6                             | 0.945753000  | 0.004444000  | -0.011723000 |
| 6                             | 0.205854000  | -0.018722000 | -0.049835000 | 6                             | -0.288778000 | 0.007317000  | -0.012543000 |
| 6                             | 1.546201000  | -0.019468000 | 0.010786000  | 6                             | -1.630494000 | 0.010828000  | -0.012076000 |
| 6                             | 2.804519000  | -0.020631000 | 0.067047000  | 6                             | -2.889971000 | 0.011844000  | -0.008787000 |
| 1                             | 3.540081000  | 1.172470000  | 2.260286000  | 1                             | -3.699617000 | 1.628000000  | 1.860108000  |
| 1                             | 3.662397000  | 1.507599000  | 2.921293000  | 1                             | -3.897913000 | 2.131773000  | 2.380543000  |
| 1                             | 5.185499000  | -0.672945000 | 1.374381000  | 1                             | -5.317628000 | 1.389933000  | -0.218556000 |
| 1                             | 5.843209000  | -0.800369000 | 1.712137000  | 1                             | -5.981568000 | 1.730712000  | -0.293725000 |
| 1                             | 5.728244000  | 1.971235000  | 0.234876000  | 1                             | -5.831654000 | -0.625218000 | 1.851329000  |
| 1                             | 5.187893000  | 1.451477000  | 0.220741000  | 1                             | -5.302059000 | -0.439442000 | 1.353837000  |
| 1                             | 5.958141000  | -0.720938000 | -1.390104000 | 1                             | -5.960181000 | -1.222015000 | -1.284116000 |
| 1                             | 5.296293000  | -0.599518000 | -1.058317000 | 1                             | -5.340177000 | -0.921696000 | -0.986454000 |
| 1                             | 3.158342000  | 2.716879000  | 0.221597000  | 1                             | -3.265770000 | -0.846350000 | -2.584408000 |
| 1                             | 3.063759000  | 3.454069000  | 0.128375000  | 1                             | -3.204245000 | -1.167890000 | 3.258341000  |
| 1                             | 4.046439000  | -3.145183000 | 0.116954000  | 1                             | -4.080624000 | 1.070741000  | -2.965315000 |
| 1                             | 3.728580000  | -2.467821000 | 0.051710000  | 1                             | -3.791943000 | 0.781016000  | -2.335445000 |

|                                                |              |              |              |                                                |              |              |              |
|------------------------------------------------|--------------|--------------|--------------|------------------------------------------------|--------------|--------------|--------------|
| 1                                              | 3.871067000  | 1.651262000  | -2.638652000 | 1                                              | -3.877543000 | -3.137909000 | 0.615684000  |
| 1                                              | 3.733187000  | 1.312713000  | -1.982682000 | 1                                              | -3.748042000 | -2.407828000 | 0.496340000  |
| 1                                              | 3.123618000  | -1.422657000 | 2.390429000  | 1                                              | -3.283712000 | 2.657732000  | -0.561929000 |
| 1                                              | 3.200500000  | -1.762871000 | 3.053742000  | 1                                              | -3.388105000 | 3.390035000  | -0.681353000 |
| 1                                              | 3.336133000  | -1.295805000 | -2.282127000 | 1                                              | -3.344459000 | -1.784144000 | -2.018794000 |
| 1                                              | 3.425840000  | -1.632307000 | -2.945803000 | 1                                              | -3.368399000 | -2.308251000 | -2.553849000 |
| 1                                              | 1.127755000  | -2.499166000 | 1.254747000  | 1                                              | -1.231142000 | 2.012787000  | -1.919622000 |
| 1                                              | 0.635521000  | -3.015358000 | 1.479495000  | 1                                              | -0.810285000 | 2.448781000  | -2.358353000 |
| 1                                              | 1.112928000  | 2.411933000  | -1.369989000 | 1                                              | -1.170175000 | -2.100037000 | 1.779308000  |
| 1                                              | 0.880559000  | 2.922758000  | -1.864214000 | 1                                              | -0.867772000 | -2.706553000 | 2.096134000  |
| 1                                              | 0.567535000  | 2.753065000  | 1.913603000  | 1                                              | -0.713055000 | 0.826403000  | 3.232865000  |
| 1                                              | 0.989756000  | 2.305614000  | 1.488722000  | 1                                              | -1.213449000 | 0.631046000  | 2.713031000  |
| 1                                              | 0.897460000  | 0.176363000  | -3.442523000 | 1                                              | -0.858798000 | -3.265094000 | -0.992617000 |
| 1                                              | 1.227540000  | 0.097353000  | -2.775915000 | 1                                              | -1.191596000 | -2.605729000 | -0.874267000 |
| 1                                              | 0.762460000  | -2.953722000 | -1.669582000 | 1                                              | -0.754658000 | -0.593888000 | -3.304624000 |
| 1                                              | 1.254912000  | -2.437649000 | -1.445364000 | 1                                              | -1.274973000 | -0.571678000 | -2.767580000 |
| 1                                              | 0.591583000  | -0.012064000 | 3.413287000  | 1                                              | -0.849782000 | 3.222220000  | 1.189382000  |
| 1                                              | 0.927166000  | -0.085319000 | 2.748841000  | 1                                              | -1.166707000 | 2.609237000  | 0.900538000  |
| 1                                              | -1.876615000 | 1.735403000  | -3.132654000 | 1                                              | 1.895132000  | -3.383458000 | 0.598388000  |
| 1                                              | -1.370039000 | 1.529197000  | -2.624323000 | 1                                              | 1.367860000  | -2.854534000 | 0.575244000  |
| 1                                              | -2.066772000 | -3.433554000 | -0.315312000 | 1                                              | 1.902049000  | 1.051098000  | -3.271296000 |
| 1                                              | -1.542310000 | -2.902091000 | -0.299603000 | 1                                              | 1.393022000  | 0.861221000  | -2.758390000 |
| 1                                              | -1.740174000 | -1.632748000 | -3.303524000 | 1                                              | 1.880769000  | -2.359386000 | -2.591752000 |
| 1                                              | -1.443910000 | -1.322501000 | -2.692097000 | 1                                              | 1.451692000  | -1.931525000 | -2.154993000 |
| 1                                              | -1.589743000 | 2.835482000  | -0.057911000 | 1                                              | 1.467208000  | -0.891278000 | 2.664444000  |
| 1                                              | -1.919520000 | 3.501307000  | -0.137251000 | 1                                              | 1.770953000  | -1.185263000 | 3.280800000  |
| 1                                              | -1.707913000 | 1.337626000  | 2.389271000  | 1                                              | 4.797641000  | -3.231278000 | -0.909040000 |
| 1                                              | -2.202387000 | 1.562822000  | 2.902157000  | 1                                              | 4.271240000  | -2.702277000 | -0.879280000 |
| 1                                              | -2.015844000 | -1.854335000 | 2.849055000  | 1                                              | 1.480660000  | 1.908252000  | 2.137939000  |
| 1                                              | -1.721782000 | -1.537069000 | 2.239597000  | 1                                              | 1.904629000  | 2.336639000  | 2.579152000  |
| 1                                              | -4.229366000 | 2.393505000  | -1.679649000 | 1                                              | 1.799825000  | 3.428447000  | -0.711160000 |
| 1                                              | -4.732356000 | 2.895547000  | -1.910208000 | 1                                              | 1.475318000  | 2.761914000  | -0.616021000 |
| 1                                              | -4.691652000 | -2.628371000 | -2.256002000 | 1                                              | 4.076784000  | -2.139565000 | 1.937369000  |
| 1                                              | -4.251843000 | -2.193297000 | -1.836900000 | 1                                              | 4.518227000  | -2.569419000 | 2.359778000  |
| 1                                              | -4.286053000 | 2.428471000  | 1.203441000  | 1                                              | 4.686911000  | -0.750427000 | -3.291126000 |
| 1                                              | -4.792656000 | 2.934543000  | 1.416447000  | 1                                              | 4.178107000  | -0.565933000 | -2.776427000 |
| 1                                              | -4.410527000 | -0.069292000 | 2.613182000  | 1                                              | 4.137158000  | 0.591145000  | 2.801423000  |
| 1                                              | -4.939928000 | -0.076624000 | 3.139867000  | 1                                              | 4.645276000  | 0.775685000  | 3.317064000  |
| 1                                              | -4.650110000 | 0.021768000  | -0.253486000 | 1                                              | 4.096465000  | 2.744752000  | 0.912172000  |
| 1                                              | -4.392726000 | -2.480470000 | 1.039492000  | 1                                              | 4.605176000  | 3.256961000  | 1.104410000  |
| 1                                              | -4.902196000 | -2.989090000 | 1.239207000  | 1                                              | 4.572590000  | 0.002012000  | 0.010543000  |
|                                                |              |              |              | 1                                              | 4.173436000  | 2.178899000  | -1.888951000 |
|                                                |              |              |              | 1                                              | 4.614630000  | 2.609358000  | -2.310927000 |
| <b>C<sub>6</sub>H<sub>57</sub><sup>-</sup></b> |              |              |              | <b>C<sub>6</sub>H<sub>59</sub><sup>-</sup></b> |              |              |              |
| SCF Energy = -261.98680 a. u.                  |              |              |              | SCF Energy = -263.16016 a. u.                  |              |              |              |
| 6                                              | -3.356842000 | 0.137229000  | 0.011042000  | 6                                              | 3.231034000  | 0.002150000  | 0.135228000  |
| 6                                              | -2.136686000 | 0.096404000  | 0.009300000  | 6                                              | 2.010405000  | 0.004118000  | 0.099415000  |
| 6                                              | -0.793243000 | 0.052587000  | 0.006078000  | 6                                              | 0.667164000  | 0.004129000  | 0.058486000  |
| 6                                              | 0.440963000  | 0.021986000  | -0.000735000 | 6                                              | -0.567063000 | 0.000852000  | 0.024750000  |
| 6                                              | 1.782402000  | -0.002382000 | -0.005365000 | 6                                              | -1.907890000 | -0.003987000 | -0.009039000 |
| 6                                              | 3.042140000  | -0.014878000 | -0.010696000 | 6                                              | -3.167276000 | -0.009976000 | -0.037941000 |
| 1                                              | 3.859159000  | -0.003889000 | -2.480010000 | 1                                              | -3.973184000 | -2.479328000 | -0.083065000 |
| 1                                              | 3.983949000  | -0.099696000 | -3.214456000 | 1                                              | -4.097655000 | -3.213653000 | -0.179958000 |

|   |              |              |              |   |              |              |              |
|---|--------------|--------------|--------------|---|--------------|--------------|--------------|
| 1 | 5.477578000  | 1.120670000  | -0.709989000 | 1 | -5.626700000 | -0.745989000 | 1.077068000  |
| 1 | 6.136280000  | 1.452715000  | -0.847748000 | 1 | -6.283583000 | -0.886895000 | 1.410810000  |
| 1 | 5.977674000  | -1.757598000 | -0.984575000 | 1 | -6.143838000 | -1.047923000 | -1.680615000 |
| 1 | 5.446901000  | -1.274400000 | -0.767828000 | 1 | -5.531872000 | -0.767706000 | -1.349712000 |
| 1 | 6.132342000  | -0.220880000 | 1.720927000  | 1 | -6.268518000 | 1.694120000  | -0.243732000 |
| 1 | 5.469238000  | -0.149722000 | 1.377553000  | 1 | -5.605540000 | 1.350807000  | -0.170731000 |
| 1 | 3.334980000  | -2.354307000 | -1.424723000 | 1 | -3.479975000 | -1.379444000 | -2.411911000 |
| 1 | 3.403806000  | -3.017719000 | -1.766086000 | 1 | -3.433647000 | -1.719407000 | -3.077923000 |
| 1 | 4.094659000  | 2.694973000  | 1.646845000  | 1 | -4.378252000 | 1.592770000  | 2.645180000  |
| 1 | 3.961629000  | 2.040629000  | 1.302912000  | 1 | -4.107306000 | 1.260957000  | 2.028138000  |
| 1 | 3.988466000  | -2.868855000 | 1.481505000  | 1 | -4.118383000 | 1.511695000  | -2.872635000 |
| 1 | 3.862865000  | -2.206295000 | 1.151152000  | 1 | -3.989853000 | 1.177696000  | -2.212424000 |
| 1 | 3.478574000  | 2.355395000  | -1.276759000 | 1 | -3.632435000 | -1.318822000 | 2.307361000  |
| 1 | 3.566398000  | 3.020575000  | -1.610634000 | 1 | -3.719790000 | -1.654869000 | 2.971410000  |
| 1 | 3.447256000  | -0.081716000 | 2.686668000  | 1 | -3.598683000 | 2.684435000  | -0.051545000 |
| 1 | 3.556532000  | -0.177879000 | 3.421689000  | 1 | -3.707343000 | 3.419725000  | -0.147288000 |
| 1 | 1.375418000  | 2.750183000  | 0.182831000  | 1 | -1.544366000 | 0.120419000  | 2.752347000  |
| 1 | 1.042402000  | 3.414527000  | 0.266866000  | 1 | -1.211181000 | 0.202305000  | 3.417107000  |
| 1 | 1.237097000  | -2.748482000 | -0.026254000 | 1 | -1.343682000 | 0.062055000  | -2.738835000 |
| 1 | 0.901705000  | -3.412967000 | 0.046472000  | 1 | -1.007036000 | 0.137762000  | -3.402482000 |
| 1 | 0.869882000  | -1.444911000 | -3.026311000 | 1 | -0.943125000 | -2.967920000 | -1.531339000 |
| 1 | 1.369608000  | -1.237050000 | -2.510443000 | 1 | -1.446708000 | -2.454457000 | -1.326840000 |
| 1 | 1.074834000  | -1.955697000 | 2.861365000  | 1 | -1.066453000 | 2.871212000  | -1.815292000 |
| 1 | 1.311545000  | -1.462008000 | 2.351632000  | 1 | -1.490935000 | 2.425103000  | -1.391299000 |
| 1 | 0.872612000  | 1.539806000  | 2.964564000  | 1 | -1.048313000 | 2.930932000  | 1.606969000  |
| 1 | 1.365871000  | 1.322639000  | 2.446004000  | 1 | -1.542460000 | 2.414881000  | 1.386004000  |
| 1 | 1.021200000  | 1.747711000  | -2.983047000 | 1 | -1.176302000 | -3.029856000 | 1.697836000  |
| 1 | 1.326762000  | 1.443157000  | -2.372275000 | 1 | -1.486033000 | -2.418304000 | 1.399346000  |
| 1 | -1.774357000 | -2.894450000 | 1.755048000  | 1 | 1.730139000  | 1.607471000  | -2.915987000 |
| 1 | -1.345269000 | -2.449535000 | 1.335654000  | 1 | 1.228640000  | 1.391966000  | -2.406069000 |
| 1 | -1.715187000 | 3.010646000  | 1.812083000  | 1 | 1.537195000  | 1.745193000  | 3.048944000  |
| 1 | -1.210108000 | 2.510007000  | 1.582728000  | 1 | 1.031137000  | 1.521037000  | 2.547280000  |
| 1 | -1.802980000 | -0.051946000 | 3.442123000  | 1 | 1.461961000  | 3.467921000  | -0.009398000 |
| 1 | -1.278095000 | -0.038183000 | 2.911140000  | 1 | 1.129896000  | 2.801986000  | 0.062888000  |
| 1 | -1.381650000 | -2.297487000 | -1.476832000 | 1 | 1.317653000  | -1.369374000 | -2.377916000 |
| 1 | -1.675897000 | -2.906233000 | -1.795463000 | 1 | 1.615553000  | -1.681200000 | -2.988287000 |
| 1 | -4.578844000 | -1.790183000 | 2.727108000  | 1 | 4.104557000  | 3.014108000  | -1.725559000 |
| 1 | -4.134973000 | -1.377418000 | 2.289678000  | 1 | 3.669209000  | 2.572345000  | -1.309027000 |
| 1 | -1.246170000 | 0.183402000  | -2.884676000 | 1 | 1.193027000  | -2.793612000 | 0.094512000  |
| 1 | -1.773099000 | 0.177664000  | -3.413625000 | 1 | 1.525963000  | -3.458380000 | 0.171622000  |
| 1 | -1.579120000 | 3.203837000  | -1.602241000 | 1 | 1.404991000  | -1.652427000 | 3.195170000  |
| 1 | -1.281851000 | 2.593227000  | -1.290434000 | 1 | 1.111400000  | -1.339610000 | 2.583309000  |
| 1 | -3.824740000 | -2.796964000 | -0.116013000 | 1 | 4.125358000  | 0.011782000  | -2.490974000 |
| 1 | -4.348502000 | -3.329606000 | -0.128838000 | 1 | 4.660456000  | 0.007684000  | -3.013582000 |
| 1 | -4.558065000 | 1.697326000  | 3.011581000  | 1 | 4.250022000  | 3.014112000  | 1.635389000  |
| 1 | -4.051787000 | 1.492906000  | 2.501835000  | 1 | 3.745527000  | 2.504377000  | 1.424609000  |
| 1 | -4.071852000 | -1.298105000 | -2.345507000 | 1 | 3.689016000  | -2.570732000 | -1.343190000 |
| 1 | -4.575925000 | -1.505158000 | -2.857040000 | 1 | 4.189247000  | -3.080273000 | -1.561742000 |
| 1 | -4.034371000 | 1.605402000  | -2.400724000 | 1 | 3.768618000  | -2.506064000 | 1.527483000  |
| 1 | -4.540727000 | 1.829283000  | -2.902237000 | 1 | 4.279179000  | -3.008223000 | 1.740728000  |
| 1 | -4.416807000 | 0.192425000  | -0.000019000 | 1 | 4.291261000  | -0.009795000 | 0.177239000  |
| 1 | -3.986568000 | 3.020636000  | 0.070654000  | 1 | 3.868057000  | 0.021168000  | 2.882562000  |
| 1 | -4.511615000 | 3.551458000  | 0.084293000  | 1 | 4.210100000  | 0.093897000  | 3.543278000  |
| 1 | -6.305856000 | -1.364481000 | 0.110725000  | 1 | 6.325521000  | -1.628224000 | -0.468827000 |
| 1 | -6.815217000 | -1.143060000 | -0.386596000 | 1 | 6.993190000  | -1.715459000 | -0.788437000 |
|   |              |              |              | 1 | 6.109688000  | 1.701462000  | -0.385582000 |

|                                                |              |              |              |                                                |              |              |              |
|------------------------------------------------|--------------|--------------|--------------|------------------------------------------------|--------------|--------------|--------------|
| <b>C<sub>6</sub>H<sub>61</sub><sup>-</sup></b> |              |              |              | <b>C<sub>6</sub>H<sub>63</sub><sup>-</sup></b> |              |              |              |
| SCF Energy = -264.33449 a. u.                  |              |              |              | SCF Energy = -265.50630 a. u.                  |              |              |              |
| 6                                              | 3.115728000  | -0.011139000 | -0.024058000 | 6                                              | 2.942796000  | -0.223376000 | 0.039822000  |
| 6                                              | 1.894309000  | -0.004818000 | -0.018888000 | 6                                              | 1.723799000  | -0.151768000 | 0.033890000  |
| 6                                              | 0.550582000  | 0.000544000  | -0.010202000 | 6                                              | 0.382689000  | -0.075705000 | 0.023235000  |
| 6                                              | -0.684358000 | 0.002666000  | -0.003856000 | 6                                              | -0.850378000 | -0.014589000 | 0.005622000  |
| 6                                              | -2.025649000 | 0.008265000  | 0.000230000  | 6                                              | -2.189744000 | 0.049181000  | -0.014297000 |
| 6                                              | -3.285622000 | 0.016266000  | -0.000915000 | 6                                              | -3.448298000 | 0.106711000  | -0.030666000 |
| 1                                              | -4.162430000 | 1.315774000  | 2.081547000  | 1                                              | -4.430076000 | -2.227129000 | 0.648349000  |
| 1                                              | -4.293206000 | 1.656862000  | 2.737784000  | 1                                              | -4.564592000 | -2.954431000 | 0.777802000  |
| 1                                              | -5.727920000 | 1.411183000  | -0.044525000 | 1                                              | -5.931225000 | -0.124088000 | 1.251003000  |
| 1                                              | -6.390816000 | 1.756403000  | -0.107055000 | 1                                              | -6.594622000 | -0.209293000 | 1.590465000  |
| 1                                              | -6.365205000 | -0.779550000 | 1.600543000  | 1                                              | -6.486783000 | -1.122998000 | -1.385845000 |
| 1                                              | -5.709052000 | -0.647498000 | 1.262236000  | 1                                              | -5.870924000 | -0.826594000 | -1.076997000 |
| 1                                              | -6.342185000 | -1.025326000 | -1.482345000 | 1                                              | -6.459734000 | 1.889020000  | -0.650981000 |
| 1                                              | -5.726237000 | -0.741674000 | -1.161897000 | 1                                              | -5.804104000 | 1.543195000  | -0.536711000 |
| 1                                              | -3.678105000 | -1.253315000 | 2.397332000  | 1                                              | -3.861955000 | -1.860379000 | -1.903688000 |
| 1                                              | -3.765386000 | -1.585963000 | 3.062919000  | 1                                              | -3.886824000 | -2.391875000 | -2.430796000 |
| 1                                              | -4.436154000 | 1.496355000  | -2.793342000 | 1                                              | -4.445836000 | 2.475938000  | 2.135037000  |
| 1                                              | -4.166321000 | 1.177731000  | -2.169077000 | 1                                              | -4.249960000 | 1.957150000  | 1.628963000  |
| 1                                              | -4.282042000 | -3.182771000 | 0.208392000  | 1                                              | -4.316816000 | 0.795961000  | -3.208494000 |
| 1                                              | -4.154416000 | -2.449880000 | 0.106764000  | 1                                              | -4.190173000 | 0.675737000  | -2.478277000 |
| 1                                              | -3.702666000 | 2.721200000  | -0.043523000 | 1                                              | -3.956198000 | -0.496525000 | 2.589855000  |
| 1                                              | -3.813216000 | 3.455410000  | -0.143507000 | 1                                              | -4.068132000 | -0.616432000 | 3.320900000  |
| 1                                              | -3.718765000 | -1.397247000 | -2.318429000 | 1                                              | -3.717403000 | 2.698117000  | -0.885434000 |
| 1                                              | -3.741028000 | -1.914860000 | -2.859273000 | 1                                              | -3.799851000 | 3.370699000  | -1.205052000 |
| 1                                              | -1.573764000 | 2.329760000  | -1.483409000 | 1                                              | -1.758157000 | 0.850675000  | 2.622775000  |
| 1                                              | -1.253511000 | 2.932871000  | -1.788514000 | 1                                              | -1.444451000 | 1.141264000  | 3.236462000  |
| 1                                              | -1.576647000 | -2.398587000 | 1.431407000  | 1                                              | -1.666317000 | -0.779760000 | -2.654908000 |
| 1                                              | -1.263900000 | -3.006717000 | 1.733627000  | 1                                              | -1.335390000 | -0.892488000 | -3.315975000 |
| 1                                              | -1.218122000 | 0.192017000  | 3.426017000  | 1                                              | -1.522851000 | -3.340986000 | -0.624242000 |
| 1                                              | -1.552455000 | 0.114357000  | 2.761601000  | 1                                              | -1.855943000 | -2.676162000 | -0.543175000 |
| 1                                              | -1.266941000 | -3.138230000 | -1.416232000 | 1                                              | -1.243595000 | 2.182005000  | -2.676020000 |
| 1                                              | -1.595733000 | -2.478201000 | -1.291696000 | 1                                              | -1.551143000 | 1.860005000  | -2.075184000 |
| 1                                              | -1.292363000 | -0.025046000 | -3.420975000 | 1                                              | -1.310497000 | 3.348345000  | 0.756307000  |
| 1                                              | -1.628035000 | 0.034217000  | -2.755089000 | 1                                              | -1.644119000 | 2.685818000  | 0.661027000  |
| 1                                              | -1.270559000 | 3.025794000  | 1.674571000  | 1                                              | -1.557046000 | -2.258176000 | 2.523084000  |
| 1                                              | -1.582919000 | 2.416648000  | 1.373665000  | 1                                              | -1.854157000 | -1.923452000 | 1.923724000  |
| 1                                              | 1.505734000  | -3.398561000 | 0.234253000  | 1                                              | 1.528607000  | 0.552061000  | -3.310292000 |
| 1                                              | 0.998691000  | -2.884004000 | 0.044217000  | 1                                              | 0.999098000  | 0.537677000  | -2.783616000 |
| 1                                              | 1.458178000  | 1.604687000  | -3.067034000 | 1                                              | 1.313350000  | 2.422313000  | 2.427199000  |
| 1                                              | 0.951761000  | 1.405004000  | -2.555683000 | 1                                              | 0.881613000  | 1.987463000  | 2.000390000  |
| 1                                              | 1.319180000  | -1.752832000 | -3.052477000 | 1                                              | 1.442477000  | 3.253765000  | -0.895081000 |
| 1                                              | 1.022012000  | -1.438756000 | -2.442947000 | 1                                              | 1.111466000  | 2.593564000  | -0.781081000 |
| 1                                              | 1.104036000  | -1.393516000 | 2.431770000  | 1                                              | 0.860668000  | -2.187874000 | -1.878495000 |
| 1                                              | 1.403537000  | -1.702514000 | 3.042827000  | 1                                              | 1.153299000  | -2.794790000 | -2.201937000 |
| 1                                              | 3.932452000  | -3.164319000 | -1.690738000 | 1                                              | 4.267259000  | 1.935104000  | -2.310790000 |
| 1                                              | 3.436188000  | -2.649989000 | -1.473425000 | 1                                              | 3.766348000  | 1.695725000  | -1.809247000 |
| 1                                              | 1.121408000  | 1.487791000  | 2.353964000  | 1                                              | 0.674831000  | -2.830954000 | 0.943442000  |
| 1                                              | 1.416039000  | 1.807404000  | 2.962019000  | 1                                              | 1.178400000  | -3.342877000 | 1.149693000  |
| 1                                              | 1.399400000  | 3.472483000  | -0.092252000 | 1                                              | 1.158188000  | -0.889054000 | 3.471887000  |
| 1                                              | 1.069574000  | 2.805724000  | -0.019230000 | 1                                              | 0.833040000  | -0.784081000 | 2.807451000  |
| 1                                              | 3.907728000  | -2.260994000 | 1.365315000  | 1                                              | 3.719709000  | -1.164957000 | -2.519422000 |

|                                                 |              |              |              |                                                 |              |              |              |
|-------------------------------------------------|--------------|--------------|--------------|-------------------------------------------------|--------------|--------------|--------------|
| 1                                               | 4.420602000  | -2.764850000 | 1.570972000  | 1                                               | 4.326941000  | -1.453329000 | -2.846990000 |
| 1                                               | 4.354293000  | -0.123741000 | -3.241956000 | 1                                               | 4.055777000  | 2.926743000  | 0.948012000  |
| 1                                               | 3.823630000  | -0.112586000 | -2.715075000 | 1                                               | 3.549185000  | 2.411616000  | 0.754173000  |
| 1                                               | 3.480932000  | 0.059521000  | 2.942442000  | 1                                               | 3.223420000  | -3.130193000 | -0.455751000 |
| 1                                               | 4.002636000  | 0.063476000  | 3.476959000  | 1                                               | 3.742814000  | -3.666946000 | -0.471071000 |
| 1                                               | 3.860732000  | 2.315971000  | 1.244063000  | 1                                               | 3.638381000  | -1.946181000 | 2.071889000  |
| 1                                               | 4.370942000  | 2.821836000  | 1.452534000  | 1                                               | 4.155986000  | -2.164646000 | 2.565781000  |
| 1                                               | 4.177076000  | -0.020202000 | -0.029261000 | 1                                               | 4.000674000  | -0.302147000 | 0.021586000  |
| 1                                               | 3.531545000  | 2.464793000  | -1.414292000 | 1                                               | 3.375170000  | 0.664784000  | 2.820852000  |
| 1                                               | 3.958175000  | 2.910124000  | -1.836743000 | 1                                               | 3.701391000  | 0.946138000  | 3.431593000  |
| 1                                               | 5.997071000  | 0.181370000  | 1.798127000  | 1                                               | 5.895295000  | -2.109639000 | 0.034163000  |
| 1                                               | 6.660033000  | -0.151005000 | 1.876502000  | 1                                               | 6.561070000  | -2.432792000 | -0.055092000 |
| 1                                               | 5.847768000  | -1.605156000 | -0.942676000 | 1                                               | 6.335313000  | 0.298295000  | -1.543310000 |
| 1                                               | 6.575144000  | -1.484909000 | -0.830331000 | 1                                               | 6.999832000  | 0.206569000  | -1.868104000 |
| 1                                               | 6.011312000  | 1.663212000  | -0.867564000 | 1                                               | 5.710860000  | 0.683549000  | 1.337192000  |
| 1                                               | 6.742355000  | 1.762114000  | -0.757670000 | 1                                               | 6.382248000  | 0.566722000  | 1.640768000  |
|                                                 |              |              |              | 1                                               | 6.471370000  | 3.038532000  | -0.524925000 |
|                                                 |              |              |              | 1                                               | 6.999604000  | 3.563959000  | -0.530472000 |
| <b>C<sub>2</sub>H<sub>8</sub><sup>2-</sup></b>  |              |              |              | <b>C<sub>2</sub>H<sub>10</sub><sup>2-</sup></b> |              |              |              |
| SCF Energy = -80.63355 a. u.                    |              |              |              | SCF Energy = -81.81425 a. u.                    |              |              |              |
| 6                                               | 0.634902000  | -0.000045000 | -0.000083000 | 6                                               | 0.858192145  | 0.000393708  | -0.002922117 |
| 6                                               | -0.634901000 | -0.000024000 | -0.000106000 | 6                                               | -0.411530034 | -0.000374128 | 0.000603262  |
| 1                                               | -2.333775000 | -1.041094000 | -0.325344000 | 1                                               | -2.057312025 | 1.193138589  | -0.629407124 |
| 1                                               | -3.037491000 | -1.437155000 | -0.446814000 | 1                                               | -2.694378461 | 1.618106550  | -0.851172080 |
| 1                                               | 3.037380000  | -1.437199000 | 0.447129000  | 1                                               | 3.245028135  | 1.545752145  | 0.005198108  |
| 1                                               | 2.333698000  | -1.041092000 | 0.325616000  | 1                                               | 2.555453028  | 1.111860139  | 0.002199790  |
| 1                                               | 2.333693000  | 1.041160000  | -0.325365000 | 1                                               | 2.555147693  | -1.112579820 | 0.002882958  |
| 1                                               | 3.037376000  | 1.437269000  | -0.446846000 | 1                                               | 3.244424344  | -1.546708897 | 0.005373795  |
| 1                                               | -3.037268000 | 1.437316000  | 0.447213000  | 1                                               | -2.707080831 | -0.067489679 | 1.819138341  |
| 1                                               | -2.333619000 | 1.041211000  | 0.325546000  | 1                                               | -2.067308183 | -0.049842147 | 1.344276374  |
|                                                 |              |              |              | 1                                               | -2.695682882 | -1.549762779 | -0.968371082 |
|                                                 |              |              |              | 1                                               | -2.058265073 | -1.142593695 | -0.716205952 |
| <b>C<sub>2</sub>H<sub>12</sub><sup>2-</sup></b> |              |              |              | <b>C<sub>2</sub>H<sub>14</sub><sup>2-</sup></b> |              |              |              |
| SCF Energy = -82.99441 a. u.                    |              |              |              | SCF Energy = -84.17474 a. u.                    |              |              |              |
| 6                                               | -0.632512000 | -0.376520000 | -0.000254000 | 6                                               | -0.621764000 | -0.471562000 | -0.303546000 |
| 6                                               | 0.636922000  | -0.386991000 | -0.000856000 | 6                                               | 0.647829000  | -0.457862000 | -0.314954000 |
| 1                                               | -1.552534000 | 1.656594000  | -0.001477000 | 1                                               | -1.468448000 | 0.671804000  | 1.462119000  |
| 1                                               | -1.910174000 | 2.350166000  | -0.002012000 | 1                                               | -1.789987000 | 1.042709000  | 2.062949000  |
| 1                                               | 2.425475000  | -0.432028000 | 1.118378000  | 1                                               | 2.470638000  | -1.344497000 | 0.271219000  |
| 1                                               | 3.121762000  | -0.426975000 | 1.515699000  | 1                                               | 3.163577000  | -1.667463000 | 0.513311000  |
| 1                                               | -3.118219000 | -0.434913000 | 1.517182000  | 1                                               | -3.141545000 | -1.694790000 | 0.501006000  |
| 1                                               | -2.421942000 | -0.434084000 | 1.120383000  | 1                                               | -2.446755000 | -1.369163000 | 0.267785000  |
| 1                                               | -2.423602000 | -0.436534000 | -1.118223000 | 1                                               | -2.369992000 | 0.615523000  | -0.901732000 |
| 1                                               | -3.120349000 | -0.438111000 | -1.514185000 | 1                                               | -3.021791000 | 1.025349000  | -1.098350000 |
| 1                                               | 1.889211000  | 2.360720000  | 0.003309000  | 1                                               | -0.101835000 | 2.776019000  | -0.487991000 |
| 1                                               | 1.534245000  | 1.666746000  | 0.001757000  | 1                                               | -0.038303000 | 2.011926000  | -0.425851000 |
| 1                                               | 3.123128000  | -0.421921000 | -1.515468000 | 1                                               | 1.760606000  | 1.072898000  | 2.072765000  |
| 1                                               | 2.426537000  | -0.428594000 | -1.118684000 | 1                                               | 1.447853000  | 0.697391000  | 1.470480000  |
|                                                 |              |              |              | 1                                               | 3.011584000  | 1.082663000  | -1.096306000 |
|                                                 |              |              |              | 1                                               | 2.368011000  | 0.656171000  | -0.900404000 |
| <b>C<sub>2</sub>H<sub>16</sub><sup>2-</sup></b> |              |              |              | <b>C<sub>2</sub>H<sub>18</sub><sup>2-</sup></b> |              |              |              |

|                                                 |              |              |              |                                                 |              |              |              |
|-------------------------------------------------|--------------|--------------|--------------|-------------------------------------------------|--------------|--------------|--------------|
| SCF Energy = -85.35527 a. u.                    |              |              |              | SCF Energy = -86.53425 a. u.                    |              |              |              |
| 6                                               | 0.630674000  | 0.001480000  | -0.666840000 | 6                                               | 0.577915000  | 0.005900000  | -0.566786000 |
| 6                                               | -0.639863000 | -0.001284000 | -0.681024000 | 6                                               | -0.689229000 | -0.008958000 | -0.663146000 |
| 1                                               | 1.407728000  | 0.002067000  | 1.527235000  | 1                                               | 1.863666000  | -0.016093000 | 1.330832000  |
| 1                                               | 1.701988000  | 0.002983000  | 2.239430000  | 1                                               | 2.297539000  | -0.023128000 | 1.971937000  |
| 1                                               | -0.001722000 | 2.724674000  | 1.106857000  | 1                                               | 0.721130000  | 2.618643000  | 1.271899000  |
| 1                                               | -0.001111000 | 2.093279000  | 0.668479000  | 1                                               | 0.600512000  | 2.011206000  | 0.818342000  |
| 1                                               | -2.426716000 | 1.176753000  | -0.436294000 | 1                                               | -1.761506000 | 1.977561000  | -0.112246000 |
| 1                                               | -3.079300000 | 1.610048000  | -0.305824000 | 1                                               | -2.144985000 | 2.613903000  | 0.102226000  |
| 1                                               | 3.074854000  | 1.612826000  | -0.325113000 | 1                                               | 3.161633000  | 1.537164000  | -0.762741000 |
| 1                                               | 2.420038000  | 1.179653000  | -0.445713000 | 1                                               | 2.482215000  | 1.141333000  | -0.737376000 |
| 1                                               | 2.419831000  | -1.180492000 | -0.449249000 | 1                                               | 2.460059000  | -1.174034000 | -0.740735000 |
| 1                                               | 3.074036000  | -1.614511000 | -0.330138000 | 1                                               | 3.129761000  | -1.584115000 | -0.767498000 |
| 1                                               | 0.007661000  | -2.718438000 | 1.117026000  | 1                                               | 0.654842000  | -2.636405000 | 1.264529000  |
| 1                                               | 0.006313000  | -2.089248000 | 0.675587000  | 1                                               | 0.541262000  | -2.025850000 | 0.814100000  |
| 1                                               | -1.670681000 | 0.001839000  | 2.250543000  | 1                                               | -1.476321000 | 0.017428000  | 2.372864000  |
| 1                                               | -1.380641000 | -0.000195000 | 1.537190000  | 1                                               | -1.223959000 | 0.011748000  | 1.645342000  |
| 1                                               | -3.074409000 | -1.618778000 | -0.306196000 | 1                                               | -3.692424000 | 0.037659000  | -0.515383000 |
| 1                                               | -2.422739000 | -1.183637000 | -0.436640000 | 1                                               | -2.903299000 | 0.024980000  | -0.583830000 |
|                                                 |              |              |              | 1                                               | -1.821822000 | -1.943566000 | -0.106147000 |
|                                                 |              |              |              | 1                                               | -2.220418000 | -2.570089000 | 0.113474000  |
| <b>C<sub>2</sub>H<sub>20</sub><sup>2-</sup></b> |              |              |              | <b>C<sub>2</sub>H<sub>22</sub><sup>2-</sup></b> |              |              |              |
| SCF Energy = -87.71400 a. u.                    |              |              |              | SCF Energy = -88.89406 a. u.                    |              |              |              |
| 6                                               | 0.708374000  | 0.035546000  | -0.597141000 | 6                                               | 0.740884133  | -0.000169866 | -0.457521887 |
| 6                                               | -0.551490000 | -0.093998000 | -0.490829000 | 6                                               | -0.527375930 | -0.000071968 | -0.387164067 |
| 1                                               | 1.962468000  | 2.506463000  | 0.799751000  | 1                                               | 0.402748337  | 2.989920250  | 0.955343796  |
| 1                                               | 1.640592000  | 1.901791000  | 0.444751000  | 1                                               | 0.355365277  | 2.303113269  | 0.621496983  |
| 1                                               | 2.938082000  | 0.220950000  | -0.481340000 | 1                                               | 2.550649157  | 1.150232898  | 0.353152787  |
| 1                                               | 3.720929000  | 0.276390000  | -0.401833000 | 1                                               | 3.161835121  | 1.531217763  | 0.642149183  |
| 1                                               | 2.453582000  | -2.517226000 | -0.501584000 | 1                                               | 3.251701060  | 0.001364748  | -2.146515963 |
| 1                                               | 2.004555000  | -1.889991000 | -0.553519000 | 1                                               | 2.588568940  | 0.000949873  | -1.726688959 |
| 1                                               | -0.332958000 | -2.399605000 | 0.335298000  | 1                                               | 3.161727169  | -1.531103460 | 0.640482804  |
| 1                                               | -0.382857000 | -3.111927000 | 0.613905000  | 1                                               | 2.549864916  | -1.150524475 | 0.352171163  |
| 1                                               | -3.008597000 | -1.781915000 | -1.020184000 | 1                                               | 0.354776832  | -2.304021338 | 0.621429777  |
| 1                                               | -2.370619000 | -1.340097000 | -0.908764000 | 1                                               | 0.402782734  | -2.990884411 | 0.955032111  |
| 1                                               | 1.273135000  | -0.489643000 | 1.657531000  | 1                                               | -1.883693203 | -2.644604049 | -1.401957223 |
| 1                                               | 1.537383000  | -0.647935000 | 2.362248000  | 1                                               | -1.514298378 | -2.004136061 | -1.187838350 |
| 1                                               | -0.637716000 | 3.157598000  | -1.068054000 | 1                                               | 0.611526754  | -0.002100834 | 2.049941115  |
| 1                                               | -0.485128000 | 2.411728000  | -0.975375000 | 1                                               | 0.722812200  | -0.002599848 | 2.808136223  |
| 1                                               | -3.233466000 | 1.278676000  | -0.221899000 | 1                                               | -1.882572935 | 2.646678423  | -1.398323892 |
| 1                                               | -2.545421000 | 0.916321000  | -0.311516000 | 1                                               | -1.513232086 | 2.005944260  | -1.184971268 |
| 1                                               | -0.839419000 | 1.961715000  | 1.984772000  | 1                                               | -3.570136115 | 0.002791410  | -0.805191869 |
| 1                                               | -0.684297000 | 1.495430000  | 1.398018000  | 1                                               | -2.794860224 | 0.001764277  | -0.714321022 |
| 1                                               | -2.178871000 | -0.899242000 | 2.000767000  | 1                                               | -2.278077894 | 1.550284548  | 1.664694257  |
| 1                                               | -1.772677000 | -0.698771000 | 1.374847000  | 1                                               | -1.837845815 | 1.175177255  | 1.155962829  |
|                                                 |              |              |              | 1                                               | -2.280564498 | -1.552043004 | 1.660904289  |
|                                                 |              |              |              | 1                                               | -1.840125511 | -1.175972079 | 1.153028012  |
| <b>C<sub>2</sub>H<sub>24</sub><sup>2-</sup></b> |              |              |              | <b>C<sub>2</sub>H<sub>26</sub><sup>2-</sup></b> |              |              |              |
| SCF Energy = -90.07454 a. u.                    |              |              |              | SCF Energy = -91.25406 a. u.                    |              |              |              |
| 6                                               | -0.634685667 | -0.053424148 | -0.381038312 | 6                                               | -0.597614155 | 0.029564075  | -0.071025112 |
| 6                                               | 0.635476258  | -0.056041987 | -0.382228960 | 6                                               | 0.661856273  | 0.106485809  | -0.207536967 |

|                                                 |              |              |              |                                                 |              |              |              |
|-------------------------------------------------|--------------|--------------|--------------|-------------------------------------------------|--------------|--------------|--------------|
| 1                                               | 1.552428245  | -2.990086412 | 0.375230062  | 1                                               | -1.695430988 | -0.528992037 | 1.915618995  |
| 1                                               | 1.285565217  | -2.297151029 | 0.185213096  | 1                                               | -2.064335265 | -0.710633186 | 2.566073086  |
| 1                                               | -1.268772835 | -2.304400229 | 0.183332929  | 1                                               | 1.086044227  | -1.271621396 | 2.730832952  |
| 1                                               | -1.533183656 | -2.998212457 | 0.372951954  | 1                                               | 0.876831885  | -0.957449922 | 2.067213990  |
| 1                                               | -3.023803998 | 1.805235796  | -0.981515845 | 1                                               | 2.323906231  | -2.532040110 | -0.126508288 |
| 1                                               | -2.418454330 | 1.342413141  | -0.841797176 | 1                                               | 1.907823156  | -1.886607382 | -0.144574929 |
| 1                                               | -3.068697809 | -1.224234103 | -1.877122409 | 1                                               | 2.717698244  | 0.272006631  | 0.824805823  |
| 1                                               | -2.447148967 | -0.927176221 | -1.520316182 | 1                                               | 3.402065188  | 0.325517035  | 1.183682192  |
| 1                                               | -3.245665264 | -0.525450254 | 1.230747216  | 1                                               | -0.696886219 | -3.113626015 | 0.697338137  |
| 1                                               | -2.599022837 | -0.406608156 | 0.823830021  | 1                                               | -0.595887979 | -2.381507175 | 0.505260025  |
| 1                                               | -1.277135952 | 1.526584816  | 1.342315243  | 1                                               | -2.571713058 | -1.107038276 | -0.381837369 |
| 1                                               | -1.542842199 | 2.010214191  | 1.872266149  | 1                                               | -3.229823285 | -1.502117776 | -0.493386346 |
| 1                                               | -0.008328192 | 3.222805336  | -0.765789860 | 1                                               | -3.132865842 | 1.600115053  | 0.689153881  |
| 1                                               | -0.007044937 | 2.460654099  | -0.699305089 | 1                                               | -2.500450874 | 1.197763069  | 0.494466926  |
| 1                                               | 0.000649300  | -0.755254999 | 2.044646167  | 1                                               | 0.233970958  | 2.112157013  | 2.429428937  |
| 1                                               | 0.000624958  | -0.969313017 | 2.779465929  | 1                                               | 0.190083114  | 1.637353256  | 1.831109918  |
| 1                                               | 3.077985398  | -1.211087223 | -1.877898183 | 1                                               | 2.303233393  | 2.715126971  | -0.516992943 |
| 1                                               | 2.454616187  | -0.918766007 | -1.520163250 | 1                                               | 1.892140459  | 2.067063174  | -0.447214043 |
| 1                                               | 3.008149348  | 1.824322161  | -0.977312061 | 1                                               | -0.645207828 | 2.502703052  | -0.600988189 |
| 1                                               | 2.411852315  | 1.347976381  | -0.844581177 | 1                                               | -0.805709933 | 3.237958327  | -0.730947242 |
| 1                                               | 3.248128584  | -0.508185846 | 1.234057220  | 1                                               | -2.404454946 | 0.815255232  | -2.511976355 |
| 1                                               | 2.601539604  | -0.394192070 | 0.825757284  | 1                                               | -1.932179068 | 0.628503289  | -1.935716089 |
| 1                                               | 1.528931188  | 2.015913959  | 1.872441307  | 1                                               | 2.401670415  | -0.057866061 | -1.656339077 |
| 1                                               | 1.264889203  | 1.530794950  | 1.343150285  | 1                                               | 2.999364476  | -0.128754116 | -2.149632288 |
|                                                 |              |              |              | 1                                               | -0.252255090 | -2.135406416 | -2.562291057 |
|                                                 |              |              |              | 1                                               | -0.193084078 | -1.614161005 | -2.005208175 |
| <b>C<sub>2</sub>H<sub>28</sub><sup>2-</sup></b> |              |              |              | <b>C<sub>2</sub>H<sub>30</sub><sup>2-</sup></b> |              |              |              |
| SCF Energy = -92.43480 a. u.                    |              |              |              | SCF Energy = -93.61378 a. u.                    |              |              |              |
| 6                                               | -0.643493823 | 0.024085502  | -0.052347801 | 6                                               | -0.635383123 | -0.000394766 | 0.001027133  |
| 6                                               | 0.623411017  | 0.004558862  | 0.022623915  | 6                                               | 0.634470292  | -0.000505893 | -0.000468851 |
| 1                                               | -3.089072191 | -1.264593922 | 1.354622319  | 1                                               | -1.263921867 | -1.731407103 | -1.606192124 |
| 1                                               | -2.474769902 | -0.945853532 | 1.014152852  | 1                                               | -1.515112782 | -2.259895893 | -2.096514005 |
| 1                                               | -2.129834179 | 1.413568431  | 1.104401915  | 1                                               | -3.185760283 | 1.360845443  | 1.258491979  |
| 1                                               | -2.595122272 | 1.866208657  | 1.517080263  | 1                                               | -2.570521350 | 1.021914294  | 0.946036098  |
| 1                                               | -3.399258432 | 0.414394470  | -1.421394962 | 1                                               | -2.564990919 | 0.309790945  | -1.361196287 |
| 1                                               | -2.711959316 | 0.313922232  | -1.079177094 | 1                                               | -3.178075042 | 0.412068207  | -1.813707395 |
| 1                                               | 0.130709956  | -0.051675217 | -2.546146388 | 1                                               | -3.178702117 | -1.777005249 | 0.547222193  |
| 1                                               | 0.223549341  | -0.132386389 | -3.300387484 | 1                                               | -2.565143851 | -1.334111938 | 0.410857979  |
| 1                                               | 1.905690043  | 2.494277492  | -1.444156992 | 1                                               | -0.001638862 | -2.433047980 | 0.752004793  |
| 1                                               | 1.581473726  | 1.884568991  | -1.113874187 | 1                                               | -0.002062733 | -3.162332019 | 0.977343811  |
| 1                                               | -1.211201525 | 2.811511845  | -1.497251992 | 1                                               | 1.516201300  | -2.260533022 | -2.094644421 |
| 1                                               | -1.051972091 | 2.144391845  | -1.159111963 | 1                                               | 1.266241251  | -1.731300210 | -1.604406151 |
| 1                                               | 0.392366409  | 2.955091920  | 1.489968925  | 1                                               | 0.000167220  | 0.737986358  | -3.224104466 |
| 1                                               | 0.319074831  | 2.276088187  | 1.150152992  | 1                                               | 0.000578920  | 0.566632944  | -2.480227307 |
| 1                                               | 2.456485241  | 0.953527131  | 1.105091962  | 1                                               | 1.515849397  | 2.943951151  | -0.913643042 |
| 1                                               | 3.071772858  | 1.270997496  | 1.446957928  | 1                                               | 1.266194154  | 2.255584157  | -0.697718086 |
| 1                                               | 3.379488370  | -0.382197739 | -1.343241303 | 1                                               | 2.568811050  | 0.308806146  | -1.358743022 |
| 1                                               | 2.694427145  | -0.285603841 | -0.997907110 | 1                                               | 3.184227256  | 0.411657036  | -1.807884329 |
| 1                                               | -0.080913847 | -0.047290454 | 2.519328214  | 1                                               | 3.180013418  | -1.775068989 | 0.550399903  |
| 1                                               | -0.167102004 | -0.126968143 | 3.274269411  | 1                                               | 2.566133413  | -1.333225036 | 0.412534941  |
| 1                                               | -1.880555711 | -2.465016636 | -1.531370166 | 1                                               | -1.265128921 | 2.254835371  | -0.693459268 |
| 1                                               | -1.566337669 | -1.850445526 | -1.198691246 | 1                                               | -1.515447222 | 2.944001423  | -0.906302295 |
| 1                                               | 1.331280310  | -2.789631424 | -1.393200927 | 1                                               | -1.514954029 | -0.679251917 | 3.006291936  |
| 1                                               | 1.091639218  | -2.144139957 | -1.062967865 | 1                                               | -1.265287145 | -0.521089833 | 2.302315270  |



|                                                 |              |              |              |                                                 |              |              |              |
|-------------------------------------------------|--------------|--------------|--------------|-------------------------------------------------|--------------|--------------|--------------|
| 1                                               | -0.415460762 | -2.958429441 | 1.420060377  | 1                                               | 1.516800328  | -0.682904827 | 3.006076031  |
| 1                                               | -0.332904878 | -2.277639206 | 1.086716282  | 1                                               | 1.266396300  | -0.523256814 | 2.302803172  |
| 1                                               | 2.555539284  | -1.852867041 | 1.598338076  | 1                                               | -0.000193679 | 2.427465160  | 2.246637357  |
| 1                                               | 2.093464356  | -1.395679065 | 1.186080952  | 1                                               | -0.001035071 | 1.867127309  | 1.728230981  |
| <b>C<sub>2</sub>H<sub>32</sub><sup>2-</sup></b> |              |              |              | <b>C<sub>2</sub>H<sub>34</sub><sup>2-</sup></b> |              |              |              |
| SCF Energy = -94.79025 a. u.                    |              |              |              | SCF Energy = -95.96886 a. u.                    |              |              |              |
| 6                                               | -0.624909118 | 0.016629924  | -0.013200856 | 6                                               | 0.634170249  | -0.000363545 | -0.001311830 |
| 6                                               | 0.645249104  | -0.014369279 | 0.018713824  | 6                                               | -0.637033098 | -0.001444654 | -0.000438688 |
| 1                                               | -3.048909225 | -0.094454435 | -0.202795010 | 1                                               | 3.161510206  | -0.002245828 | 0.003885219  |
| 1                                               | -3.814021209 | -0.130222583 | -0.265260150 | 1                                               | 3.925491338  | -0.002117767 | 0.005212925  |
| 1                                               | -2.100574911 | 1.925851167  | 1.994165304  | 1                                               | 2.442928249  | -2.562374137 | -0.794930063 |
| 1                                               | -1.735855896 | 1.461988149  | 1.504830868  | 1                                               | 2.016909342  | -1.958137858 | -0.607517178 |
| 1                                               | -0.011901726 | -0.233124274 | 3.421820433  | 1                                               | -0.005038826 | -3.166325190 | 1.071799304  |
| 1                                               | 0.000595854  | -0.183303824 | 2.663736981  | 1                                               | -0.004314911 | -2.444515251 | 0.828819104  |
| 1                                               | 0.159520482  | 2.626872906  | -0.059574246 | 1                                               | 0.001690192  | -1.542533160 | -2.071972881 |
| 1                                               | 0.193500540  | 3.386501026  | -0.079904177 | 1                                               | 0.002737963  | -2.000526014 | -2.680514017 |
| 1                                               | -2.502362262 | -1.435961095 | 2.136757405  | 1                                               | 2.441031148  | -1.552739930 | 2.187643090  |
| 1                                               | -2.054946073 | -1.089076942 | 1.623470291  | 1                                               | 2.014492060  | -1.186413805 | 1.672365210  |
| 1                                               | -1.404819543 | -2.193092028 | -0.606291074 | 1                                               | 2.014142274  | 1.223372602  | 1.646645079  |
| 1                                               | -1.688732662 | -2.878033129 | -0.791760821 | 1                                               | 2.439545219  | 1.601815299  | 2.154017050  |
| 1                                               | -2.109611142 | -0.282888632 | -2.847363074 | 1                                               | 2.449014846  | 2.538674405  | -0.855545201 |
| 1                                               | -1.748836085 | -0.217986630 | -2.177692970 | 1                                               | 2.021786239  | 1.940003483  | -0.653672018 |
| 1                                               | -2.353420034 | 2.376486341  | -1.316586116 | 1                                               | 2.445090467  | -0.034968562 | -2.679328130 |
| 1                                               | -1.940080743 | 1.814920269  | -1.002866030 | 1                                               | 2.019345145  | -0.024769729 | -2.046499875 |
| 1                                               | 3.020552733  | 2.104992483  | -0.242217127 | 1                                               | -2.436961246 | -0.028814760 | -2.684755372 |
| 1                                               | 2.459269242  | 1.588700700  | -0.177199764 | 1                                               | -2.012892887 | -0.020579174 | -2.050804203 |
| 1                                               | 0.607925174  | 1.294642194  | -2.166710954 | 1                                               | 0.004847793  | 1.495106178  | -2.103945241 |
| 1                                               | 0.732291352  | 1.680729915  | -2.812406154 | 1                                               | 0.006212012  | 1.935015458  | -2.725663949 |
| 1                                               | 0.590255945  | -1.592880141 | -2.936618342 | 1                                               | 0.003050707  | 3.195721515  | 0.989969980  |
| 1                                               | 0.492632797  | -1.233481475 | -2.273243330 | 1                                               | 0.002768126  | 2.467836093  | 0.766325916  |
| 1                                               | 1.235311370  | 1.644711995  | 1.846850295  | 1                                               | -2.018803796 | -1.955671363 | -0.612717932 |
| 1                                               | 1.471025438  | 2.129842646  | 2.383186254  | 1                                               | -2.444343798 | -2.559509172 | -0.802728019 |
| 1                                               | 0.200394662  | -2.837998224 | 1.896044200  | 1                                               | -0.003286720 | 0.035587170  | 3.342468188  |
| 1                                               | 0.180757952  | -2.206607215 | 1.473557022  | 1                                               | -0.003085103 | 0.029202117  | 2.580922329  |
| 1                                               | 1.915554965  | -2.962425788 | -0.545248891 | 1                                               | -2.440294004 | 1.606318069  | 2.149367170  |
| 1                                               | 1.603237728  | -2.280618474 | -0.411177073 | 1                                               | -2.015203274 | 1.227136111  | 1.642219041  |
| 1                                               | 3.258264445  | -0.493502765 | -1.756758927 | 1                                               | -2.441250228 | 2.542824213  | -0.858351957 |
| 1                                               | 2.638313189  | -0.378624205 | -1.320489328 | 1                                               | -2.014766174 | 1.943681265  | -0.656405218 |
| 1                                               | 3.118953243  | -0.759152390 | 1.727476375  | 1                                               | -3.925701422 | 0.002001878  | -0.002007169 |
| 1                                               | 2.513673955  | -0.566371530 | 1.287190849  | 1                                               | -3.161619217 | 0.000641892  | -0.002187090 |
| <b>C<sub>2</sub>H<sub>36</sub><sup>2-</sup></b> |              |              |              | <b>C<sub>2</sub>H<sub>38</sub><sup>2-</sup></b> |              |              |              |
| SCF Energy = -97.14482 a. u.                    |              |              |              | SCF Energy = -98.32119 a. u.                    |              |              |              |
| 6                                               | 0.634339056  | 0.003965125  | 0.001584886  | 6                                               | 0.631410060  | -0.003584118 | 0.010185075  |
| 6                                               | -0.638169770 | -0.004450910 | -0.006050083 | 6                                               | -0.642089915 | -0.007183052 | -0.004248764 |
| 1                                               | 2.785571576  | -1.242770123 | -0.655773910 | 1                                               | 2.482254056  | -1.379543392 | 1.227437213  |
| 1                                               | 3.419140679  | -1.615324136 | -0.854060858 | 1                                               | 2.948302047  | -1.816791969 | 1.637117243  |
| 1                                               | 3.521753440  | -0.003858760 | 1.677860187  | 1                                               | 3.079697287  | 1.346198346  | 1.639188972  |
| 1                                               | 2.867482393  | -0.001743639 | 1.288549247  | 1                                               | 2.482868431  | 1.027205538  | 1.283695104  |

|                                                 |              |              |              |                                                 |              |              |              |
|-------------------------------------------------|--------------|--------------|--------------|-------------------------------------------------|--------------|--------------|--------------|
| 1                                               | 1.825775282  | 2.647536220  | 1.395403892  | 1                                               | 2.736407305  | 2.187693891  | -1.285195322 |
| 1                                               | 1.526215979  | 2.028122079  | 1.065504212  | 1                                               | 2.239681322  | 1.672555714  | -1.028536948 |
| 1                                               | 0.899291225  | 0.159614146  | 2.550937030  | 1                                               | 0.279733148  | 1.688494004  | 2.103738332  |
| 1                                               | 1.062478376  | 0.209628805  | 3.291210492  | 1                                               | 0.297086458  | 2.206690295  | 2.656811109  |
| 1                                               | 3.514960391  | 1.375091424  | -0.987718331 | 1                                               | 3.938717065  | -0.425756964 | -0.754924263 |
| 1                                               | 2.864286162  | 1.056472215  | -0.753960102 | 1                                               | 3.198458949  | -0.318162529 | -0.623388262 |
| 1                                               | 1.366327190  | -0.113634993 | -2.346281962 | 1                                               | 1.657132843  | -2.122043632 | -0.873685926 |
| 1                                               | 1.634359171  | -0.143278974 | -3.059816098 | 1                                               | 1.982074662  | -2.751157592 | -1.152389295 |
| 1                                               | 0.900016198  | -3.016402396 | -1.418494012 | 1                                               | 0.317325371  | -3.074557388 | 1.492595232  |
| 1                                               | 0.760316050  | -2.338998895 | -1.104752230 | 1                                               | 0.245394307  | -2.394693213 | 1.161829288  |
| 1                                               | 1.690606479  | -2.586605164 | 1.622523063  | 1                                               | 0.897929123  | -0.646244486 | 3.341912022  |
| 1                                               | 1.414006060  | -1.984133161 | 1.245815009  | 1                                               | 0.774485830  | -0.517337437 | 2.604792986  |
| 1                                               | -1.020976063 | -1.840954202 | 2.742479085  | 1                                               | -1.920820279 | 0.151726230  | 2.994500279  |
| 1                                               | -0.859825715 | -1.424420268 | 2.127932316  | 1                                               | -1.585497060 | 0.098635993  | 2.313245955  |
| 1                                               | -1.529340771 | -2.291342251 | -0.086707809 | 1                                               | -2.109542349 | -1.819408751 | 0.941242281  |
| 1                                               | -1.831417899 | -2.991638488 | -0.108921082 | 1                                               | -2.584881633 | -2.334437917 | 1.239370160  |
| 1                                               | -1.092821929 | -1.451492977 | -2.969327317 | 1                                               | -0.909655691 | -3.065794213 | -1.368452366 |
| 1                                               | -0.922280802 | -1.128710201 | -2.303311182 | 1                                               | -0.791489353 | -2.390483079 | -1.041299115 |
| 1                                               | -1.379161855 | 1.094218957  | 2.084755157  | 1                                               | -1.787511004 | 2.066587444  | 0.856935878  |
| 1                                               | -1.646360911 | 1.425559058  | 2.717203992  | 1                                               | -2.130606778 | 2.680766434  | 1.146267244  |
| 1                                               | 1.069097855  | 2.743582420  | -1.854201096 | 1                                               | 1.882307288  | -0.291172373 | -3.019927246 |
| 1                                               | 0.901639185  | 2.131695296  | -1.436853288 | 1                                               | 1.551730260  | -0.218762404 | -2.338898352 |
| 1                                               | -1.675538157 | 1.656540165  | -2.562742974 | 1                                               | -1.023543102 | -0.575233133 | -3.292478400 |
| 1                                               | -1.403267995 | 1.271846826  | -1.962811023 | 1                                               | -0.890369297 | -0.467956733 | -2.552162075 |
| 1                                               | -3.493538238 | -0.844935197 | 1.496376203  | 1                                               | -3.931732455 | 0.382319450  | 0.731908228  |
| 1                                               | -2.846162900 | -0.649619049 | 1.146442930  | 1                                               | -3.191230388 | 0.275287530  | 0.595958889  |
| 1                                               | -3.423842419 | 1.818926141  | 0.110468926  | 1                                               | -2.709156794 | 1.722886820  | -1.797537326 |
| 1                                               | -2.791217368 | 1.396181783  | 0.083977254  | 1                                               | -2.251563997 | 1.292337627  | -1.364307321 |
| 1                                               | -0.906384317 | 3.322483280  | 0.285888009  | 1                                               | 0.069597392  | 2.201111180  | -2.649749239 |
| 1                                               | -0.767496986 | 2.579049042  | 0.217198156  | 1                                               | 0.075005054  | 1.680927298  | -2.097891982 |
| 1                                               | -3.534380138 | -0.701323371 | -1.503390977 | 1                                               | -3.380869522 | -1.339322746 | -1.541474276 |
| 1                                               | -2.876323887 | -0.542446369 | -1.154610252 | 1                                               | -2.762610575 | -1.042657513 | -1.216652051 |
|                                                 |              |              |              | 1                                               | 0.392610360  | 2.815266357  | 0.040594245  |
|                                                 |              |              |              | 1                                               | 0.496361380  | 3.559429272  | -0.045808229 |
| <b>C<sub>2</sub>H<sub>40</sub><sup>2-</sup></b> |              |              |              | <b>C<sub>2</sub>H<sub>42</sub><sup>2-</sup></b> |              |              |              |
| SCF Energy = -99.49550 a. u.                    |              |              |              | SCF Energy = -100.67056 a. u.                   |              |              |              |
| 6                                               | 0.635606965  | 0.027146264  | -0.000215904 | 6                                               | -0.689153000 | 0.248932000  | 0.019873000  |
| 6                                               | -0.637994083 | -0.015990678 | 0.010930156  | 6                                               | 0.393040000  | -0.425960000 | -0.005882000 |
| 1                                               | 0.328553983  | 2.646249261  | 0.523071073  | 1                                               | -0.343485000 | 0.314313000  | 2.689875000  |
| 1                                               | 0.427756196  | 3.389710486  | 0.635996968  | 1                                               | -0.437227000 | 0.429179000  | 3.434256000  |
| 1                                               | 3.641460213  | 1.311593329  | 0.001625103  | 1                                               | -3.310764000 | 1.784069000  | 1.223009000  |
| 1                                               | 2.953994406  | 0.975957896  | 0.002644828  | 1                                               | -2.690551000 | 1.445607000  | 0.929681000  |
| 1                                               | 3.211296260  | -0.895036111 | 2.168287902  | 1                                               | -1.603001000 | 3.547606000  | -0.685296000 |
| 1                                               | 2.678546006  | -0.697222247 | 1.668772097  | 1                                               | -1.462490000 | 2.813649000  | -0.566354000 |
| 1                                               | 2.354005304  | 0.007666191  | -2.097672374 | 1                                               | -3.248124000 | -0.566019000 | -0.254846000 |
| 1                                               | 2.738457338  | -0.001318181 | -2.749532489 | 1                                               | -3.932828000 | -0.877079000 | -0.342054000 |
| 1                                               | 1.969347420  | 1.722171373  | 2.598358190  | 1                                               | -0.539537000 | 3.033307000  | 1.933106000  |
| 1                                               | 1.650992270  | 1.377564269  | 2.002608856  | 1                                               | -0.559642000 | 2.369334000  | 1.567027000  |
| 1                                               | -0.798108831 | 1.331830125  | 2.273307361  | 1                                               | 1.633172000  | 1.264372000  | 1.588382000  |
| 1                                               | -0.924851016 | 1.688960209  | 2.930496291  | 1                                               | 2.067729000  | 1.696499000  | 2.035226000  |
| 1                                               | -2.464948902 | 2.862195383  | 0.651652148  | 1                                               | 2.068082000  | -1.119948000 | 2.947276000  |
| 1                                               | -2.105334860 | 2.206879212  | 0.536435973  | 1                                               | 1.719927000  | -0.984890000 | 2.288987000  |
| 1                                               | 1.687887037  | 2.583617429  | -1.976627311 | 1                                               | -2.840267000 | -0.965106000 | 2.357382000  |

|                                                 |              |              |              |                                                 |              |              |              |
|-------------------------------------------------|--------------|--------------|--------------|-------------------------------------------------|--------------|--------------|--------------|
| 1                                               | 1.443215057  | 2.047212148  | -1.501294377 | 1                                               | -2.332390000 | -0.741319000 | 1.841146000  |
| 1                                               | -0.058502662 | 0.493604896  | -3.419873060 | 1                                               | -1.991698000 | -3.016382000 | 0.155728000  |
| 1                                               | 0.022715992  | 0.389671309  | -2.673229363 | 1                                               | -1.635169000 | -2.348189000 | 0.109358000  |
| 1                                               | -2.798662892 | 0.650554105  | -1.113692150 | 1                                               | 1.532006000  | -2.603063000 | 0.585142000  |
| 1                                               | -3.454901948 | 0.842332174  | -1.452044379 | 1                                               | 1.867702000  | -3.273206000 | 0.721519000  |
| 1                                               | -3.347664179 | 0.271787023  | 1.904025251  | 1                                               | 3.647680000  | -0.392147000 | 0.532531000  |
| 1                                               | -2.778740956 | 0.224827304  | 1.400159079  | 1                                               | 2.896702000  | -0.463978000 | 0.411754000  |
| 1                                               | 0.788215863  | -1.810264039 | -1.798708924 | 1                                               | -1.658720000 | -1.022986000 | -1.996937000 |
| 1                                               | 0.964804956  | -2.337859048 | -2.316546434 | 1                                               | -1.999972000 | -1.328856000 | -2.602971000 |
| 1                                               | -1.687252025 | -2.233370883 | 2.219285243  | 1                                               | 4.392754000  | 2.761095000  | 0.012323000  |
| 1                                               | -1.446555224 | -1.723048220 | 1.709513982  | 1                                               | 3.853894000  | 2.242048000  | 0.025097000  |
| 1                                               | -1.956383107 | -1.548326063 | -2.691229327 | 1                                               | 2.609325000  | 0.949365000  | -2.002911000 |
| 1                                               | -1.644180172 | -1.220835197 | -2.082425190 | 1                                               | 2.083390000  | 0.683572000  | -1.520827000 |
| 1                                               | -1.092275289 | -3.447314076 | -0.498754849 | 1                                               | 0.129222000  | -3.299515000 | -1.777397000 |
| 1                                               | -0.968667950 | -2.709419266 | -0.391578993 | 1                                               | 0.184846000  | -2.632933000 | -1.419083000 |
| 1                                               | 1.165757371  | -2.987763323 | 1.273555010  | 1                                               | 0.752969000  | -0.862667000 | -3.465580000 |
| 1                                               | 1.018958310  | -2.317582034 | 0.945741875  | 1                                               | 0.637678000  | -0.739197000 | -2.728108000 |
| 1                                               | -3.604647997 | -1.821741893 | -0.174178162 | 1                                               | -0.265176000 | 1.786186000  | -2.889510000 |
| 1                                               | -2.935900249 | -1.471708077 | -0.108972942 | 1                                               | -0.325073000 | 1.429214000  | -2.220712000 |
| 1                                               | 2.800218144  | -1.447772331 | -0.442161988 | 1                                               | 2.920217000  | -2.019278000 | -1.772752000 |
| 1                                               | 3.351423454  | -1.945206354 | -0.597822122 | 1                                               | 2.331342000  | -1.689453000 | -1.428225000 |
| 1                                               | -1.192681909 | 2.765674511  | -1.969150037 | 1                                               | -2.636722000 | 1.168017000  | -1.539338000 |
| 1                                               | -0.983302876 | 2.217809368  | -1.490962191 | 1                                               | -3.158047000 | 1.395711000  | -2.040299000 |
| 1                                               | 0.583169204  | -0.794494021 | 3.387556206  | 1                                               | -0.445567000 | -2.573445000 | 2.598394000  |
| 1                                               | 0.477109912  | -0.664518035 | 2.649079301  | 1                                               | -0.302653000 | -2.055603000 | 2.064937000  |
|                                                 |              |              |              | 1                                               | 1.251788000  | 3.096215000  | -0.502203000 |
|                                                 |              |              |              | 1                                               | 0.915358000  | 2.428068000  | -0.380673000 |
| <b>C<sub>4</sub>H<sub>2</sub><sup>2-</sup></b>  |              |              |              | <b>C<sub>4</sub>H<sub>4</sub><sup>2-</sup></b>  |              |              |              |
| SCF Energy = -153.33660 a. u.                   |              |              |              | SCF Energy = -154.51697 a. u.                   |              |              |              |
| 6                                               | 0.000000000  | 0.000000000  | 0.350891084  | 6                                               | -0.691961167 | -0.031596115 | -0.002706212 |
| 6                                               | 0.000000000  | 0.000000000  | -1.034707683 | 6                                               | 0.692134208  | -0.031640037 | 0.002379710  |
| 6                                               | 0.000000000  | 0.000000000  | -2.294237379 | 6                                               | 1.949295306  | -0.031030954 | 0.007221153  |
| 6                                               | 0.000000000  | 0.000000000  | 1.608688253  | 6                                               | -1.949133907 | -0.030599674 | -0.006920051 |
| 1                                               | 0.000000000  | 0.000000000  | 4.512486494  | 1                                               | 4.865577367  | 0.229402042  | -0.014294136 |
| 1                                               | 0.000000000  | 0.000000000  | 3.703706803  | 1                                               | 4.066345622  | 0.145814791  | -0.005745807 |
|                                                 |              |              |              | 1                                               | -4.866536236 | 0.228596105  | 0.014351816  |
|                                                 |              |              |              | 1                                               | -4.067393922 | 0.145387216  | 0.005838942  |
| <b>C<sub>4</sub>H<sub>6</sub><sup>2-</sup></b>  |              |              |              | <b>C<sub>4</sub>H<sub>8</sub><sup>2-</sup></b>  |              |              |              |
| SCF Energy = -155.69614 a. u.                   |              |              |              | SCF Energy = -156.87525 a. u.                   |              |              |              |
| 6                                               | 0.438354029  | -0.009777079 | -0.042994064 | 6                                               | -0.690653041 | -0.000175687 | -0.000123827 |
| 6                                               | -0.944125239 | -0.033174122 | -0.038833143 | 6                                               | 0.690853070  | -0.000008996 | -0.000351903 |
| 6                                               | -2.201041328 | -0.054173992 | -0.034209192 | 6                                               | 1.947138380  | 0.000111127  | -0.000900660 |
| 6                                               | 1.694672148  | 0.011841928  | -0.046905213 | 6                                               | -1.946944172 | -0.000420167 | 0.000386299  |
| 1                                               | -5.125786521 | 0.208649298  | 0.273263956  | 1                                               | 4.507539215  | -1.509569121 | 0.424731419  |
| 1                                               | -4.337406084 | 0.123435356  | 0.177779743  | 1                                               | 3.825688509  | -1.137852796 | 0.316721050  |
| 1                                               | 3.558114267  | -1.132386395 | 0.118354725  | 1                                               | 4.506366559  | 1.509827360  | -0.421872803 |
| 1                                               | 4.244580457  | -1.511010071 | 0.188329950  | 1                                               | 3.824063406  | 1.138405257  | -0.314943015 |
| 1                                               | 4.205841507  | 1.608972951  | 0.138256023  | 1                                               | -3.824990524 | 1.138892100  | 0.316152185  |
| 1                                               | 3.527495542  | 1.214036857  | 0.081663691  | 1                                               | -4.507081477 | 1.510323199  | 0.423565112  |
|                                                 |              |              |              | 1                                               | -4.508127131 | -1.509081220 | -0.422921632 |
|                                                 |              |              |              | 1                                               | -3.825823449 | -1.137981915 | -0.315492830 |
| <b>C<sub>4</sub>H<sub>10</sub><sup>2-</sup></b> |              |              |              | <b>C<sub>4</sub>H<sub>12</sub><sup>2-</sup></b> |              |              |              |

|                                                 |              |              |              |                                                 |              |              |              |
|-------------------------------------------------|--------------|--------------|--------------|-------------------------------------------------|--------------|--------------|--------------|
| SCF Energy = -158.05407 a. u.                   |              |              |              | SCF Energy = -159.23291 a. u.                   |              |              |              |
| 6                                               | 0.914880258  | 0.001102805  | -0.002670758 | 6                                               | -0.690085233 | -0.003767213 | -0.000532881 |
| 6                                               | -0.466094029 | 0.002630011  | -0.007349214 | 6                                               | 0.690114867  | -0.003782030 | -0.000849329 |
| 6                                               | -1.721767081 | 0.004974795  | -0.013119892 | 6                                               | 1.945552965  | -0.003794201 | -0.001128206 |
| 6                                               | 2.171074550  | -0.000717564 | 0.001841008  | 6                                               | -1.945522273 | -0.003735991 | -0.000198971 |
| 1                                               | -3.519114962 | 1.348505030  | -0.343766241 | 1                                               | 3.745680084  | -0.386062320 | 1.346832829  |
| 1                                               | -4.152315228 | 1.785339261  | -0.450125047 | 1                                               | 4.375461337  | -0.508400163 | 1.781923951  |
| 1                                               | -4.101966130 | -0.497355175 | 1.813325329  | 1                                               | 4.365299017  | 1.810119044  | -0.439422967 |
| 1                                               | -3.480455918 | -0.374257963 | 1.364214185  | 1                                               | 3.738120258  | 1.367180753  | -0.333131895 |
| 1                                               | -4.149016337 | -1.312181245 | -1.296696989 | 1                                               | 4.383216958  | -1.273505267 | -1.335744449 |
| 1                                               | -3.516597136 | -0.988821137 | -0.983002304 | 1                                               | 3.751586231  | -0.963869371 | -1.009889270 |
| 1                                               | 4.050276625  | -1.203213595 | 0.004480015  | 1                                               | -3.750269638 | -0.920701208 | -1.050527437 |
| 1                                               | 4.716325570  | -1.614040352 | 0.005122965  | 1                                               | -4.381423577 | -1.216242997 | -1.390085132 |
| 1                                               | 4.715400568  | 1.609357663  | 0.007883153  | 1                                               | -4.377694465 | -0.582830001 | 1.756956839  |
| 1                                               | 4.048901294  | 1.198726701  | 0.006358065  | 1                                               | -3.747341701 | -0.442341908 | 1.328203144  |
|                                                 |              |              |              | 1                                               | -4.365055595 | 1.827050070  | -0.363527307 |
|                                                 |              |              |              | 1                                               | -3.737941396 | 1.380078919  | -0.275331981 |
| <b>C<sub>4</sub>H<sub>14</sub><sup>2-</sup></b> |              |              |              | <b>C<sub>4</sub>H<sub>16</sub><sup>2-</sup></b> |              |              |              |
| SCF Energy = -160.41120 a. u.                   |              |              |              | SCF Energy = -161.58911 a. u.                   |              |              |              |
| 6                                               | 0.844340931  | -0.105465026 | -0.016573831 | 6                                               | -0.690693258 | -0.080280951 | -0.073343967 |
| 6                                               | -0.534084839 | -0.087147026 | -0.047260291 | 6                                               | 0.686150271  | -0.073966279 | -0.129836284 |
| 6                                               | -1.789073136 | -0.065498914 | -0.077621306 | 6                                               | 1.940579228  | -0.071690288 | -0.181833240 |
| 6                                               | 2.099251968  | -0.124513290 | 0.012491758  | 6                                               | -1.944833284 | -0.081607069 | -0.017767126 |
| 1                                               | -3.607676479 | 0.136771152  | 1.346952953  | 1                                               | 3.621958443  | 0.711249148  | 1.229669282  |
| 1                                               | -4.191610343 | 0.193555046  | 1.847094246  | 1                                               | 4.171348147  | 0.949801194  | 1.711954018  |
| 1                                               | -4.539988364 | 0.262090908  | -1.472632020 | 1                                               | 4.916200579  | -0.640405015 | -0.949376265 |
| 1                                               | -3.849980391 | 0.173918865  | -1.138915384 | 1                                               | 4.169998215  | -0.516002323 | -0.804569027 |
| 1                                               | -3.132380057 | 2.747645972  | 0.028496724  | 1                                               | 3.570137174  | -2.173837384 | 1.464203285  |
| 1                                               | -2.779719934 | 2.067116092  | -0.008761059 | 1                                               | 3.136300202  | -1.698885457 | 1.047079848  |
| 1                                               | -3.779592408 | -2.441719079 | 0.022257724  | 1                                               | 3.735922585  | 2.258153841  | -1.213893979 |
| 1                                               | -3.249869048 | -1.883847193 | 0.001283784  | 1                                               | 3.249383264  | 1.711268205  | -0.981097266 |
| 1                                               | 3.715464592  | 1.516861713  | -0.100075885 | 1                                               | -3.222824387 | 2.422506240  | 1.370020318  |
| 1                                               | 4.267622422  | 2.055485834  | -0.125041938 | 1                                               | -2.891259914 | 1.812227815  | 1.046835897  |
| 1                                               | 4.673544235  | -0.569902201 | 1.656340136  | 1                                               | -3.440639034 | -1.656813220 | -0.858648296 |
| 1                                               | 4.002628448  | -0.471069354 | 1.284923854  | 1                                               | -3.959735986 | -2.167615318 | -1.107419283 |
| 1                                               | 4.711533341  | -0.819317197 | -1.459127946 | 1                                               | -4.616655564 | -0.531755401 | 1.521749194  |
| 1                                               | 4.037413385  | -0.671842377 | -1.109016340 | 1                                               | -3.939613492 | -0.431659936 | 1.169231949  |
|                                                 |              |              |              | 1                                               | -4.546829039 | 1.042905697  | -1.267049305 |
|                                                 |              |              |              | 1                                               | -3.900909997 | 0.754129968  | -0.962009313 |
| <b>C<sub>4</sub>H<sub>18</sub><sup>2-</sup></b> |              |              |              | <b>C<sub>4</sub>H<sub>20</sub><sup>2-</sup></b> |              |              |              |
| SCF Energy = -162.76694 a. u.                   |              |              |              | SCF Energy = -163.94406 a. u.                   |              |              |              |
| 6                                               | 0.805151122  | -0.056008120 | -0.017115180 | 6                                               | -0.680165277 | -0.044055064 | -0.140270072 |
| 6                                               | -0.571196039 | -0.018648206 | -0.042700900 | 6                                               | 0.695241007  | -0.046440066 | -0.193501070 |
| 6                                               | -1.826053100 | 0.015024930  | -0.073691107 | 6                                               | 1.950054147  | -0.043584097 | -0.240707384 |
| 6                                               | 2.059906052  | -0.084640843 | 0.006838028  | 6                                               | -1.934342345 | -0.040949852 | -0.082475978 |
| 1                                               | -2.757640013 | 1.967533400  | -1.077133940 | 1                                               | 3.264835239  | -1.795783103 | -1.163100372 |
| 1                                               | -3.083471379 | 2.589729426  | -1.380703878 | 1                                               | 3.743747529  | -2.339388899 | -1.412645016 |
| 1                                               | -3.230645097 | -1.195629956 | 1.384620318  | 1                                               | 3.005933153  | 1.139296392  | 1.556182758  |
| 1                                               | -3.692278162 | -1.609175096 | 1.835296239  | 1                                               | 3.355345187  | 1.481570353  | 2.142710120  |
| 1                                               | -4.911793591 | -0.089366925 | -0.704758789 | 1                                               | 5.097514168  | 0.300398049  | -0.233660331 |

|                                                 |              |              |              |                                                 |              |              |              |
|-------------------------------------------------|--------------|--------------|--------------|-------------------------------------------------|--------------|--------------|--------------|
| 1                                               | -4.157700136 | -0.024837993 | -0.576783093 | 1                                               | 4.340053029  | 0.200053342  | -0.296038158 |
| 1                                               | -3.698617176 | 1.726201058  | 1.744194142  | 1                                               | 3.703218373  | -1.766151823 | 1.732860224  |
| 1                                               | -3.236919023 | 1.298571864  | 1.306054431  | 1                                               | 3.257977102  | -1.343697983 | 1.277276713  |
| 1                                               | -3.057844383 | -2.655912037 | -1.232299822 | 1                                               | 3.199644306  | 2.783096614  | -0.926889406 |
| 1                                               | -2.729104130 | -2.024097156 | -0.954935801 | 1                                               | 2.865224923  | 2.108513099  | -0.797031955 |
| 1                                               | 3.114918266  | 2.043819063  | 0.079303032  | 1                                               | -2.890449215 | 2.764435178  | 1.103362081  |
| 1                                               | 3.471752540  | 2.719622332  | 0.118860089  | 1                                               | -2.596326150 | 2.124249243  | 0.812325707  |
| 1                                               | 4.726096299  | 0.151271138  | 1.615880301  | 1                                               | -2.694650987 | -1.944711044 | 1.204485737  |
| 1                                               | 4.050200424  | 0.081470013  | 1.256010138  | 1                                               | -2.991456981 | -2.550775101 | 1.560573870  |
| 1                                               | 4.034496031  | -2.497098007 | 0.017480312  | 1                                               | -4.737773653 | 0.195325673  | 1.334667044  |
| 1                                               | 3.509247394  | -1.936922084 | 0.015938290  | 1                                               | -4.053410413 | 0.126307730  | 0.995858665  |
| 1                                               | 4.761615205  | 0.199130986  | -1.518452949 | 1                                               | -4.283906264 | 1.441048076  | -1.531440017 |
| 1                                               | 4.080839257  | 0.121323939  | -1.168555131 | 1                                               | -3.680504497 | 1.099809185  | -1.203624236 |
|                                                 |              |              |              | 1                                               | -4.351636189 | -1.670032068 | -1.245858402 |
|                                                 |              |              |              | 1                                               | -3.738105441 | -1.303388965 | -0.968287472 |
| <b>C<sub>4</sub>H<sub>22</sub><sup>2-</sup></b> |              |              |              | <b>C<sub>4</sub>H<sub>24</sub><sup>2-</sup></b> |              |              |              |
| SCF Energy = -165.12243 a. u.                   |              |              |              | SCF Energy = -166.29953 a. u.                   |              |              |              |
| 6                                               | -0.822265243 | -0.052388018 | -0.116133768 | 6                                               | -0.741850939 | -0.002615723 | -0.059421842 |
| 6                                               | 0.553370174  | -0.067503967 | -0.110702822 | 6                                               | 0.633180158  | -0.018710120 | -0.060563278 |
| 6                                               | 1.808777051  | -0.076276667 | -0.100125098 | 6                                               | 1.888366367  | -0.032539109 | -0.055006917 |
| 6                                               | -2.077453040 | -0.038192839 | -0.113418031 | 6                                               | -1.997389052 | 0.009972345  | -0.059819255 |
| 1                                               | 3.245617109  | -1.766415883 | -1.017676114 | 1                                               | 3.055058265  | -2.124542407 | 0.275218208  |
| 1                                               | 3.746108189  | -2.286252095 | -1.269333234 | 1                                               | 3.414191284  | -2.789586444 | 0.376151889  |
| 1                                               | 2.636683853  | 0.868090406  | 1.984634292  | 1                                               | 2.873642545  | 1.878571296  | 1.076443893  |
| 1                                               | 2.948334327  | 1.167109948  | 2.612178183  | 1                                               | 3.203783531  | 2.482672106  | 1.402339289  |
| 1                                               | 4.949712316  | 0.257555859  | 0.315534106  | 1                                               | 5.051477335  | 0.138569825  | 0.275211858  |
| 1                                               | 4.200025320  | 0.156199894  | 0.205202766  | 1                                               | 4.298013600  | 0.058058153  | 0.174000888  |
| 1                                               | 3.376076235  | -2.020317243 | 1.876120147  | 1                                               | 3.187822487  | -0.536426977 | 2.807850996  |
| 1                                               | 2.955295124  | -1.573428115 | 1.423722284  | 1                                               | 2.849042153  | -0.426974072 | 2.133918898  |
| 1                                               | 3.680643142  | 0.699234179  | -2.538602966 | 1                                               | 3.765068080  | -1.093764394 | -2.388001238 |
| 1                                               | 3.184605089  | 0.503250210  | -1.992123209 | 1                                               | 3.272765489  | -0.858088956 | -1.854563054 |
| 1                                               | 3.119182906  | 2.829922450  | -0.210008225 | 1                                               | 3.536415354  | 2.031532097  | -1.833253086 |
| 1                                               | 2.774764189  | 2.151292317  | -0.171045962 | 1                                               | 3.105806363  | 1.570001163  | -1.405886894 |
| 1                                               | -3.006517365 | 2.688915235  | 1.275236206  | 1                                               | -2.194417087 | 3.193209511  | 0.619428958  |
| 1                                               | -2.722370350 | 2.058570408  | 0.955608914  | 1                                               | -2.075854925 | 2.454651112  | 0.489298981  |
| 1                                               | -2.911232122 | -2.048793859 | 0.947555895  | 1                                               | -3.208046054 | -1.398633990 | 1.489419110  |
| 1                                               | -3.222525401 | -2.669698163 | 1.262361853  | 1                                               | -3.636137219 | -1.840779045 | 1.939656343  |
| 1                                               | -4.900761304 | 0.121886983  | 1.277766202  | 1                                               | -4.642055014 | 1.156912173  | 1.241327057  |
| 1                                               | -4.214826408 | 0.067578051  | 0.940444282  | 1                                               | -4.007933449 | 0.864023149  | 0.929073850  |
| 1                                               | -4.396250594 | 1.613111117  | -1.464105387 | 1                                               | -3.880752048 | 1.818575297  | -1.841472267 |
| 1                                               | -3.801971314 | 1.242487014  | -1.154490129 | 1                                               | -3.424960041 | 1.377823037  | -1.415217876 |
| 1                                               | -4.514617490 | -1.495344837 | -1.463940284 | 1                                               | -2.221879270 | -3.168304313 | -0.763285264 |
| 1                                               | -3.900546452 | -1.158784931 | -1.152759190 | 1                                               | -2.101063341 | -2.430342297 | -0.631606914 |
|                                                 |              |              |              | 1                                               | -4.793492313 | -1.206801946 | -0.930033249 |
|                                                 |              |              |              | 1                                               | -4.120331226 | -0.886998967 | -0.757154216 |
| <b>C<sub>4</sub>H<sub>26</sub><sup>2-</sup></b> |              |              |              | <b>C<sub>4</sub>H<sub>28</sub><sup>2-</sup></b> |              |              |              |
| SCF Energy = -167.47710 a. u.                   |              |              |              | SCF Energy = -168.65392 a. u.                   |              |              |              |
| 6                                               | -0.628801745 | 0.061375036  | -0.062860965 | 6                                               | -0.689188807 | -0.207663969 | -0.042679203 |
| 6                                               | 0.745048228  | 0.018260849  | -0.064722082 | 6                                               | 0.682240181  | -0.168687948 | 0.036030091  |
| 6                                               | 1.999569262  | -0.020789257 | -0.059844126 | 6                                               | 1.935200141  | -0.119161720 | 0.099476856  |
| 6                                               | -1.884055160 | 0.095814949  | -0.058763017 | 6                                               | -1.942550942 | -0.226600048 | -0.113617001 |
| 1                                               | 3.141191387  | -2.120111077 | 0.350652954  | 1                                               | 3.198040370  | 1.941870950  | 0.358014868  |

|                                                 |              |              |              |                                                 |              |              |              |
|-------------------------------------------------|--------------|--------------|--------------|-------------------------------------------------|--------------|--------------|--------------|
| 1                                               | 3.496310597  | -2.784319013 | 0.466691999  | 1                                               | 3.561210483  | 2.606970021  | 0.434430179  |
| 1                                               | 3.037081585  | 1.906434066  | 1.003035896  | 1                                               | 2.984495125  | -1.709085349 | -1.436034122 |
| 1                                               | 3.374255336  | 2.512790229  | 1.316496156  | 1                                               | 3.393213111  | -2.166096050 | -1.886017349 |
| 1                                               | 5.174986775  | 0.099967932  | 0.255798990  | 1                                               | 5.122457467  | -0.322254128 | -0.124283098 |
| 1                                               | 4.421097583  | 0.026810765  | 0.156487767  | 1                                               | 4.369248267  | -0.234040809 | -0.037719225 |
| 1                                               | 3.306664584  | -0.449921843 | 2.818828249  | 1                                               | 0.776141096  | 2.871576108  | -1.415269206 |
| 1                                               | 2.967188383  | -0.351593831 | 2.144179116  | 1                                               | 0.872291015  | 2.202153130  | -1.081185321 |
| 1                                               | 3.857048611  | -1.201296386 | -2.361149197 | 1                                               | 3.391833546  | 1.068208308  | -2.500170410 |
| 1                                               | 3.369005368  | -0.948452850 | -1.832474137 | 1                                               | 3.048192190  | 0.778619233  | -1.886404178 |
| 1                                               | 3.690553573  | 1.949176242  | -1.905636067 | 1                                               | 3.787469212  | 0.228418301  | 2.686091016  |
| 1                                               | 3.256777457  | 1.498451107  | -1.470517957 | 1                                               | 3.278964272  | 0.172583222  | 2.121825082  |
| 1                                               | -2.078641043 | 3.347504367  | 0.120723852  | 1                                               | 3.384876452  | -2.668318069 | 1.358145051  |
| 1                                               | -1.961861149 | 2.602359300  | 0.036748714  | 1                                               | 3.043617982  | -2.055840912 | 1.061009909  |
| 1                                               | -2.621373167 | -0.899351022 | 2.068614193  | 1                                               | -2.594686229 | -3.081037164 | -1.453902321 |
| 1                                               | -2.918352202 | -1.209950021 | 2.695734213  | 1                                               | -2.427432351 | -2.414944827 | -1.127766149 |
| 1                                               | -4.284216362 | 1.482566265  | 1.545134066  | 1                                               | -2.718335902 | 1.725791474  | -1.404082928 |
| 1                                               | -3.686283113 | 1.161233964  | 1.198066817  | 1                                               | -3.014827035 | 2.338002455  | -1.743249032 |
| 1                                               | -4.324837066 | 1.454754296  | -1.570435088 | 1                                               | -4.679670520 | -0.548452001 | -1.696607349 |
| 1                                               | -3.718371363 | 1.134671382  | -1.234145063 | 1                                               | -4.007610122 | -0.461338842 | -1.343374127 |
| 1                                               | -2.736210980 | -1.029874178 | -2.051166160 | 1                                               | -4.353164453 | -1.858971100 | 1.155328346  |
| 1                                               | -3.046741186 | -1.358100071 | -2.663574524 | 1                                               | -3.750767065 | -1.499777225 | 0.854040221  |
| 1                                               | -2.176942067 | -3.156098311 | 0.169874893  | 1                                               | -2.291035328 | 0.054802125  | 2.354709110  |
| 1                                               | -2.050542260 | -2.413768995 | 0.079496181  | 1                                               | -2.432828901 | 0.161930884  | 3.092214446  |
| 1                                               | -4.780263411 | -1.259530225 | 0.097132072  | 1                                               | -1.697138114 | 2.841810417  | 1.276641172  |
| 1                                               | -4.098089377 | -0.922324194 | 0.042544792  | 1                                               | -1.624046036 | 2.164831317  | 0.947601933  |
|                                                 |              |              |              | 1                                               | -4.580784226 | 1.268768072  | 0.913565253  |
|                                                 |              |              |              | 1                                               | -3.953925090 | 0.926503107  | 0.647181130  |
| <b>C<sub>4</sub>H<sub>30</sub><sup>2-</sup></b> |              |              |              | <b>C<sub>4</sub>H<sub>32</sub><sup>2-</sup></b> |              |              |              |
| SCF Energy = -169.83161 a. u.                   |              |              |              | SCF Energy = -171.00860 a. u.                   |              |              |              |
| 6                                               | 0.702489148  | -0.247161230 | -0.046816840 | 6                                               | -0.664674142 | -0.134502040 | -0.130881938 |
| 6                                               | -0.671322196 | -0.245908138 | -0.070339827 | 6                                               | 0.707243277  | -0.168637147 | -0.073114304 |
| 6                                               | -1.926505230 | -0.215811182 | -0.084070919 | 6                                               | 1.961394415  | -0.176326093 | -0.016147315 |
| 6                                               | 1.957259424  | -0.230538185 | -0.018637094 | 6                                               | -1.918963925 | -0.095125961 | -0.172911312 |
| 1                                               | -3.171879434 | 1.841740031  | 0.400827953  | 1                                               | 3.438870524  | 1.768521479  | 0.195771769  |
| 1                                               | -3.525728090 | 2.502563350  | 0.528359141  | 1                                               | 3.955213108  | 2.325786398  | 0.230986928  |
| 1                                               | -2.922307273 | -2.215184119 | 0.914664883  | 1                                               | 2.765851257  | -1.822264191 | -1.659559121 |
| 1                                               | -3.248291042 | -2.831765045 | 1.217762265  | 1                                               | 3.018875241  | -2.327896228 | -2.166826315 |
| 1                                               | -5.106810225 | -0.427311158 | 0.247591980  | 1                                               | 5.123532226  | -0.577230777 | -0.400403024 |
| 1                                               | -4.355695508 | -0.338102986 | 0.147381156  | 1                                               | 4.376729245  | -0.465788694 | -0.293070002 |
| 1                                               | -0.642388900 | 2.306403164  | 2.158927286  | 1                                               | 0.902347224  | 2.991752262  | -1.259454024 |
| 1                                               | -0.681363863 | 1.767652041  | 1.634259156  | 1                                               | 0.990357867  | 2.312423085  | -0.944886196 |
| 1                                               | -3.211152324 | 0.104519915  | 2.829637224  | 1                                               | 3.331238517  | 1.005770155  | -2.673699272 |
| 1                                               | -2.875261299 | 0.017756013  | 2.152807880  | 1                                               | 2.997558394  | 0.715831294  | -2.055661521 |
| 1                                               | -3.807640390 | 1.023297034  | -2.355087471 | 1                                               | 3.936691375  | 0.037385314  | 2.499121052  |
| 1                                               | -3.319511420 | 0.759579965  | -1.833549425 | 1                                               | 3.417895525  | 0.000712273  | 1.943610884  |
| 1                                               | -3.605147011 | -2.142070345 | -2.002478149 | 1                                               | 3.334828456  | -2.842805270 | 1.130516812  |
| 1                                               | -3.176154128 | -1.696225283 | -1.558960409 | 1                                               | 3.000985346  | -2.218698915 | 0.852864918  |
| 1                                               | -0.932696068 | 2.138532266  | -1.205631935 | 1                                               | 1.149006265  | 1.655529436  | 1.853242756  |
| 1                                               | -0.846868281 | 2.810721254  | -1.536734435 | 1                                               | 1.122745315  | 2.187120262  | 2.388019230  |
| 1                                               | 2.249461047  | -3.480298223 | 0.193557692  | 1                                               | -2.749154127 | -2.972435175 | -1.421319290 |
| 1                                               | 2.124751961  | -2.737313257 | 0.106383677  | 1                                               | -2.473404096 | -2.332442919 | -1.121253035 |
| 1                                               | 2.700341230  | 0.860968738  | 2.054721173  | 1                                               | -2.487628909 | 1.719066161  | -1.763097412 |
| 1                                               | 2.995976154  | 1.185081866  | 2.675463020  | 1                                               | -2.705884361 | 2.247690419  | -2.262415306 |
| 1                                               | 4.478243434  | -1.495695152 | 1.490238806  | 1                                               | -4.596828351 | -0.446141930 | -1.912704287 |

|                                                 |              |              |              |                                                 |              |              |              |
|-------------------------------------------------|--------------|--------------|--------------|-------------------------------------------------|--------------|--------------|--------------|
| 1                                               | 3.865191062  | -1.188844316 | 1.156563974  | 1                                               | -3.934820204 | -0.356552222 | -1.546334240 |
| 1                                               | 4.343084156  | -1.552219220 | -1.649038019 | 1                                               | -4.487864405 | -1.566131290 | 1.051769945  |
| 1                                               | 3.745737235  | -1.238561048 | -1.292533423 | 1                                               | -3.872884240 | -1.228679192 | 0.754680842  |
| 1                                               | 2.547963053  | 0.911923745  | -2.130699384 | 1                                               | -2.243661264 | 0.280364986  | 2.282485940  |
| 1                                               | 2.826628322  | 1.241495865  | -2.755774134 | 1                                               | -2.380039237 | 0.395765314  | 3.019553117  |
| 1                                               | 2.176975935  | 3.083279288  | -0.043462915 | 1                                               | -1.862649940 | 3.050518453  | 1.010270807  |
| 1                                               | 2.057567088  | 2.339560882  | 0.028596739  | 1                                               | -1.774088953 | 2.366955330  | 0.700153889  |
| 1                                               | 4.812172270  | 1.214546984  | -0.151714059 | 1                                               | -4.621880131 | 1.509174884  | 0.484061713  |
| 1                                               | 4.133274373  | 0.870478053  | -0.102888991 | 1                                               | -3.962881415 | 1.152264938  | 0.347032852  |
|                                                 |              |              |              | 1                                               | -1.578887107 | -2.228936378 | 1.366083769  |
|                                                 |              |              |              | 1                                               | -1.640164245 | -2.889083938 | 1.728781855  |
| <b>C<sub>4</sub>H<sub>34</sub><sup>2-</sup></b> |              |              |              | <b>C<sub>4</sub>H<sub>36</sub><sup>2-</sup></b> |              |              |              |
| SCF Energy = -172.18567 a. u.                   |              |              |              | SCF Energy = -173.36338 a. u.                   |              |              |              |
| 6                                               | -0.704638137 | -0.057119921 | -0.268899832 | 6                                               | 0.685883000  | -0.000762000 | 0.000596000  |
| 6                                               | 0.668645088  | -0.089239922 | -0.253137758 | 6                                               | -0.686345000 | -0.000927000 | 0.000156000  |
| 6                                               | 1.923811188  | -0.102784214 | -0.211958772 | 6                                               | -1.941350000 | -0.000486000 | -0.000108000 |
| 6                                               | -1.959719040 | -0.024452751 | -0.269233742 | 6                                               | 1.940877000  | -0.000398000 | 0.000563000  |
| 1                                               | 3.305958132  | 1.786871229  | 0.555540860  | 1                                               | -3.826368000 | 1.148769000  | -0.954255000 |
| 1                                               | 3.742515075  | 2.363726290  | 0.787988316  | 1                                               | -4.417563000 | 1.521147000  | -1.261085000 |
| 1                                               | 2.820022073  | -1.221870797 | -2.211214232 | 1                                               | -2.370037000 | -1.902470000 | 1.582140000  |
| 1                                               | 3.136624059  | -1.554133254 | -2.816678202 | 1                                               | -2.571531000 | -2.463076000 | 2.050384000  |
| 1                                               | 5.113977401  | -0.239051060 | -0.618642071 | 1                                               | -4.419085000 | -1.854679000 | -0.684572000 |
| 1                                               | 4.360177110  | -0.203676090 | -0.510993131 | 1                                               | -3.829573000 | -1.399964000 | -0.517441000 |
| 1                                               | 0.786584938  | 3.286754290  | -0.411208823 | 1                                               | -2.573786000 | 3.004707000  | 1.111723000  |
| 1                                               | 0.883937148  | 2.540407990  | -0.375505763 | 1                                               | -2.370180000 | 2.320506000  | 0.857703000  |
| 1                                               | 3.278223424  | 1.795279326  | -2.426079245 | 1                                               | -4.418716000 | 0.337175000  | 1.946439000  |
| 1                                               | 2.931618146  | 1.350148125  | -1.917103338 | 1                                               | -3.827846000 | 0.254279000  | 1.470741000  |
| 1                                               | 3.842613185  | -0.451616798 | 2.357469298  | 1                                               | -2.573389000 | -0.541618000 | -3.158899000 |
| 1                                               | 3.383023274  | -0.369680051 | 1.757661174  | 1                                               | -2.369552000 | -0.418699000 | -2.439559000 |
| 1                                               | 3.406517156  | -2.914048403 | 0.245750973  | 1                                               | -1.026406000 | -3.150040000 | -1.162965000 |
| 1                                               | 3.034540476  | -2.260356277 | 0.135769948  | 1                                               | -1.108161000 | -2.445927000 | -0.903487000 |
| 1                                               | 1.143486946  | 1.125652085  | 2.106420203  | 1                                               | -1.104535000 | 2.004930000  | -1.663937000 |
| 1                                               | 1.100420914  | 1.460730295  | 2.780883065  | 1                                               | -1.023791000 | 2.583430000  | -2.142037000 |
| 1                                               | -2.831989946 | -2.494659029 | -2.191030353 | 1                                               | 1.026159000  | -2.581962000 | 2.145873000  |
| 1                                               | -2.582238922 | -1.923347100 | -1.758856056 | 1                                               | 1.105759000  | -2.003487000 | 1.667543000  |
| 1                                               | -2.539660262 | 2.237407976  | -1.147173195 | 1                                               | 1.107829000  | 2.446469000  | 0.899896000  |
| 1                                               | -2.771990242 | 2.914871274  | -1.397311047 | 1                                               | 1.024566000  | 3.151311000  | 1.156864000  |
| 1                                               | -4.613020117 | 0.238174213  | -2.034645247 | 1                                               | -1.020370000 | 0.569687000  | 3.307336000  |
| 1                                               | -3.978095261 | 0.176992856  | -1.616903201 | 1                                               | -1.104809000 | 0.440351000  | 2.568454000  |
| 1                                               | 0.955376076  | -1.936121968 | 2.612308361  | 1                                               | 2.571214000  | -3.004842000 | -1.110420000 |
| 1                                               | 1.033767335  | -1.537584294 | 1.976978156  | 1                                               | 2.368325000  | -2.320395000 | -0.856429000 |
| 1                                               | -4.526307545 | -1.771784915 | 0.520215103  | 1                                               | 4.417623000  | -1.521205000 | 1.258831000  |
| 1                                               | -3.921479116 | -1.347105885 | 0.335626966  | 1                                               | 3.826429000  | -1.148676000 | 0.952056000  |
| 1                                               | -2.233342308 | -0.377056782 | 2.217057407  | 1                                               | 1.107190000  | -0.437671000 | -2.567569000 |
| 1                                               | -2.409368886 | -0.475059879 | 2.947607237  | 1                                               | 1.024391000  | -0.565437000 | -3.306925000 |
| 1                                               | -1.819270106 | 2.684740026  | 1.760899210  | 1                                               | 2.571920000  | 2.464524000  | -2.047594000 |
| 1                                               | -1.746495005 | 2.080284138  | 1.313943934  | 1                                               | 2.370460000  | 1.903458000  | -1.579919000 |
| 1                                               | -4.583491497 | 1.371798883  | 0.946883310  | 1                                               | 2.577278000  | 0.542877000  | 3.157027000  |
| 1                                               | -3.964660509 | 1.034934171  | 0.657613859  | 1                                               | 2.372771000  | 0.419555000  | 2.437920000  |
| 1                                               | -1.632798098 | -2.508366307 | 0.595323876  | 1                                               | 3.826173000  | -0.253338000 | -1.470964000 |
| 1                                               | -1.673771234 | -3.221673955 | 0.840785918  | 1                                               | 4.416376000  | -0.335705000 | -1.947608000 |
|                                                 |              |              |              | 1                                               | 4.418335000  | 1.853101000  | 0.681847000  |
|                                                 |              |              |              | 1                                               | 3.828514000  | 1.398348000  | 0.515646000  |
| <b>C<sub>4</sub>H<sub>38</sub><sup>2-</sup></b> |              |              |              | <b>C<sub>4</sub>H<sub>40</sub><sup>2-</sup></b> |              |              |              |

|                                                 |              |              |              |                                                 |              |              |              |
|-------------------------------------------------|--------------|--------------|--------------|-------------------------------------------------|--------------|--------------|--------------|
| SCF Energy = -174.54027 a. u.                   |              |              |              | SCF Energy = -175.71769 a. u.                   |              |              |              |
| 6                                               | -0.788029063 | 0.036392049  | 0.034054144  | 6                                               | 0.695841000  | 0.001233000  | -0.113418000 |
| 6                                               | 0.584066159  | 0.001373744  | -0.012415027 | 6                                               | -0.677695000 | -0.001227000 | -0.115923000 |
| 6                                               | 1.839131187  | -0.022558826 | -0.050342219 | 6                                               | -1.933720000 | -0.000278000 | -0.113820000 |
| 6                                               | -2.043070807 | 0.084821821  | 0.066964735  | 6                                               | 1.951730000  | 0.000820000  | -0.102400000 |
| 1                                               | 4.176743638  | 0.530577981  | -0.549610899 | 1                                               | -3.655604000 | 0.696504000  | 1.546109000  |
| 1                                               | 4.898941463  | 0.714537985  | -0.708265118 | 1                                               | -4.173467000 | 0.909198000  | 2.058695000  |
| 1                                               | 0.808773340  | -1.726232279 | -2.050390916 | 1                                               | -1.347631000 | -2.614875000 | 0.490056000  |
| 1                                               | 0.693594208  | -2.209425083 | -2.616365034 | 1                                               | -1.256276000 | -3.351989000 | 0.615540000  |
| 1                                               | 3.712496437  | -2.105235904 | -1.619488232 | 1                                               | -4.075621000 | -2.135840000 | 1.127857000  |
| 1                                               | 3.272552231  | -1.608682962 | -1.248006861 | 1                                               | -3.572222000 | -1.628871000 | 0.873433000  |
| 1                                               | 2.698639396  | 3.092237200  | -0.585008095 | 1                                               | -1.338360000 | 2.549150000  | 2.136630000  |
| 1                                               | 2.449916034  | 2.386468211  | -0.468474268 | 1                                               | -1.332782000 | 2.011003000  | 1.608521000  |
| 1                                               | 2.339009479  | 0.857933907  | -3.147004400 | 1                                               | -1.600670000 | -0.834570000 | 3.183347000  |
| 1                                               | 2.169357370  | 0.656363942  | -2.436147372 | 1                                               | -1.503952000 | -0.699389000 | 2.447166000  |
| 1                                               | 4.070075263  | -1.624241302 | 1.593027253  | 1                                               | -5.116164000 | -0.077757000 | -0.853692000 |
| 1                                               | 3.545747394  | -1.239546905 | 1.197803816  | 1                                               | -4.372881000 | -0.004775000 | -0.714256000 |
| 1                                               | 1.261037322  | -3.343929246 | 0.606012198  | 1                                               | -2.996378000 | -2.328516000 | -2.101297000 |
| 1                                               | 1.261614125  | -2.600322496 | 0.476122996  | 1                                               | -2.748740000 | -1.801411000 | -1.615620000 |
| 1                                               | 3.151402392  | 1.172373145  | 1.674899969  | 1                                               | -3.205769000 | 2.122098000  | -0.390739000 |
| 1                                               | 3.565433317  | 1.537289013  | 2.196042191  | 1                                               | -3.555646000 | 2.789149000  | -0.479819000 |
| 1                                               | -2.119750178 | -3.100947458 | -0.939688087 | 1                                               | 0.665702000  | -2.933245000 | -1.806031000 |
| 1                                               | -2.004538236 | -2.385508284 | -0.723308040 | 1                                               | 0.773840000  | -2.274365000 | -1.458607000 |
| 1                                               | -0.606528146 | 2.346256032  | -1.193901134 | 1                                               | 1.472945000  | 0.657527000  | 2.466425000  |
| 1                                               | -0.450811919 | 2.985292066  | -1.559685911 | 1                                               | 1.387358000  | 0.786082000  | 3.204805000  |
| 1                                               | -1.513823177 | 0.003422718  | -3.326566411 | 1                                               | 1.323660000  | -2.581370000 | 2.112760000  |
| 1                                               | -1.519465794 | 0.000713860  | -2.571626272 | 1                                               | 1.319588000  | -2.042059000 | 1.586013000  |
| 1                                               | -1.532915892 | -2.502671302 | 2.317921236  | 1                                               | -2.984420000 | 0.791469000  | -3.089004000 |
| 1                                               | -1.526868984 | -1.940173349 | 1.815609258  | 1                                               | -2.667015000 | 0.646664000  | -2.416269000 |
| 1                                               | -4.446595988 | -1.471865242 | 1.428801856  | 1                                               | 2.999850000  | -0.756195000 | -3.087460000 |
| 1                                               | -3.889312019 | -1.068582436 | 1.097150070  | 1                                               | 2.684635000  | -0.618864000 | -2.412104000 |
| 1                                               | 1.191527244  | -0.534113944 | 2.552293311  | 1                                               | -0.773043000 | 2.292825000  | -1.429513000 |
| 1                                               | 1.178580394  | -0.670657020 | 3.294178118  | 1                                               | -0.664085000 | 2.953128000  | -1.774102000 |
| 1                                               | 0.350420116  | 2.670771334  | 2.033565196  | 1                                               | 1.251274000  | 3.349759000  | 0.651096000  |
| 1                                               | 0.484965019  | 2.092058332  | 1.572063896  | 1                                               | 1.341472000  | 2.612953000  | 0.523500000  |
| 1                                               | -3.707091421 | 2.102419094  | -1.828972042 | 1                                               | 4.159289000  | -0.922082000 | 2.086574000  |
| 1                                               | -3.329843077 | 1.624595851  | -1.374355867 | 1                                               | 3.644788000  | -0.707739000 | 1.570958000  |
| 1                                               | -2.133370142 | 0.480250050  | 2.587132224  | 1                                               | 4.069980000  | 2.131046000  | 1.174539000  |
| 1                                               | -2.237659865 | 0.594714793  | 3.328186223  | 1                                               | 3.568133000  | 1.624788000  | 0.915163000  |
| 1                                               | -2.834056912 | 3.054561897  | 1.144134130  | 1                                               | 3.220352000  | -2.118475000 | -0.397056000 |
| 1                                               | -2.639731914 | 2.362329262  | 0.902719236  | 1                                               | 3.569556000  | -2.785243000 | -0.491383000 |
| 1                                               | -3.894340261 | -0.733215296 | -1.325005855 | 1                                               | 2.754969000  | 1.823074000  | -1.590333000 |
| 1                                               | -4.446706057 | -0.999989422 | -1.775363212 | 1                                               | 3.002622000  | 2.352377000  | -2.073488000 |
| 1                                               |              |              |              | 1                                               | 4.385140000  | 0.020603000  | -0.693043000 |
| 1                                               |              |              |              | 1                                               | 5.128636000  | 0.094949000  | -0.832007000 |
| <b>C<sub>4</sub>H<sub>42</sub><sup>2-</sup></b> |              |              |              | <b>C<sub>4</sub>H<sub>44</sub><sup>2-</sup></b> |              |              |              |
| SCF Energy = -176.89438 a. u.                   |              |              |              | SCF Energy = -178.07007 a. u.                   |              |              |              |
| 6                                               | -0.684043088 | 0.011304814  | 0.007498971  | 6                                               | -0.679250858 | 0.000527061  | 0.009444226  |
| 6                                               | 0.689594157  | -0.010101994 | 0.002298217  | 6                                               | 0.695083313  | 0.000531294  | 0.009471214  |
| 6                                               | 1.945505339  | -0.026581102 | 0.008308083  | 6                                               | 1.951554364  | 0.000395295  | 0.007894266  |
| 6                                               | -1.940175995 | 0.025702668  | 0.020649025  | 6                                               | -1.935881192 | 0.000998028  | 0.007851932  |
| 1                                               | 3.699562287  | 0.609018983  | -1.629424064 | 1                                               | 3.533565205  | 1.191892377  | -1.561477176 |



|                                                 |              |              |              |                                                 |              |              |              |
|-------------------------------------------------|--------------|--------------|--------------|-------------------------------------------------|--------------|--------------|--------------|
| 1                                               | 4.230744589  | 0.806311079  | -2.134902110 | 1                                               | 4.001008107  | 1.552298067  | -2.036595265 |
| 1                                               | 1.240075024  | -2.636490174 | -0.615995127 | 1                                               | 1.327755990  | -2.407060086 | -1.124648765 |
| 1                                               | 1.198816132  | -3.369370501 | -0.784280900 | 1                                               | 1.328051270  | -3.086508327 | -1.450845264 |
| 1                                               | 4.014661409  | -2.219584228 | -1.237513806 | 1                                               | 4.002162242  | -1.554593109 | -2.032130067 |
| 1                                               | 3.545041472  | -1.703672395 | -0.939754764 | 1                                               | 3.534970170  | -1.192326831 | -1.558156060 |
| 1                                               | 1.509051057  | 2.600668049  | -2.146228090 | 1                                               | 1.326131945  | 3.084185239  | -1.458771810 |
| 1                                               | 1.472792361  | 2.026091096  | -1.658617185 | 1                                               | 1.325140796  | 2.404984123  | -1.132087939 |
| 1                                               | 1.501843133  | -0.857405259 | -3.284966200 | 1                                               | 1.321168262  | -0.009009772 | -3.394496365 |
| 1                                               | 1.476198146  | -0.675528097 | -2.552964308 | 1                                               | 1.336820267  | -0.006408866 | -2.640542084 |
| 1                                               | 5.086915277  | -0.186537097 | 0.865948296  | 1                                               | 5.210099273  | 0.001683313  | 0.459683047  |
| 1                                               | 4.356174414  | -0.147843127 | 0.660367168  | 1                                               | 4.457795496  | 0.001175303  | 0.357637035  |
| 1                                               | 2.737624413  | -2.395892329 | 2.091842428  | 1                                               | 3.658665352  | -2.638883113 | 0.947806196  |
| 1                                               | 2.514621182  | -1.848381205 | 1.617487942  | 1                                               | 3.263748309  | -2.031168023 | 0.727767945  |
| 1                                               | 3.297359531  | 2.053068023  | 0.314722877  | 1                                               | 3.262485163  | 2.032280353  | 0.725499362  |
| 1                                               | 3.709981258  | 2.681898344  | 0.410535181  | 1                                               | 3.657222286  | 2.640306600  | 0.945066116  |
| 1                                               | -0.806804801 | -2.967229129 | 1.619990950  | 1                                               | 0.808516160  | -2.574616124 | 2.251228499  |
| 1                                               | -0.935300150 | -2.327821084 | 1.243604107  | 1                                               | 0.940147413  | -2.016734184 | 1.763582138  |
| 1                                               | -1.356683993 | 0.812499806  | -2.515450932 | 1                                               | -1.487501372 | 1.413145089  | -2.234871101 |
| 1                                               | -1.352318810 | 1.046453831  | -3.232483988 | 1                                               | -1.512724076 | 1.821446083  | -2.868724901 |
| 1                                               | -1.398068300 | -2.456107408 | -2.310304259 | 1                                               | -1.514185134 | -1.835888389 | -2.861270911 |
| 1                                               | -1.376032830 | -1.915398329 | -1.785024930 | 1                                               | -1.488449128 | -1.423605336 | -2.230065113 |
| 1                                               | 2.999274516  | 0.817014218  | 3.005636285  | 1                                               | 3.073161419  | 0.004994375  | 3.051151349  |
| 1                                               | 2.711938149  | 0.622932111  | 2.332860439  | 1                                               | 2.783054280  | 0.003485161  | 2.350645028  |
| 1                                               | -3.148909967 | -1.003481992 | 2.885548504  | 1                                               | -3.017134248 | -1.788733404 | 2.508893368  |
| 1                                               | -2.839021124 | -0.769438008 | 2.235464308  | 1                                               | -2.737474127 | -1.375879369 | 1.938365150  |
| 1                                               | 0.882752320  | 2.245572123  | 1.375724320  | 1                                               | 0.936108203  | 2.024149016  | 1.754388213  |
| 1                                               | 0.739152136  | 2.864287221  | 1.779964408  | 1                                               | 0.802801046  | 2.583348078  | 2.240069209  |
| 1                                               | -1.160979959 | 3.402567906  | -0.644484972 | 1                                               | -1.278117047 | 3.457190111  | 0.195250000  |
| 1                                               | -1.201965266 | 2.664930276  | -0.499175016 | 1                                               | -1.282785449 | 2.705211248  | 0.161493254  |
| 1                                               | -4.117740375 | -0.683218100 | -2.281151884 | 1                                               | -4.169212387 | -0.006236354 | -2.396051082 |
| 1                                               | -3.614030310 | -0.515746201 | -1.738666886 | 1                                               | -3.661156190 | -0.004472077 | -1.833489099 |
| 1                                               | -0.198948949 | -0.055958907 | 2.638815379  | 1                                               | -0.566313850 | 0.003594172  | 2.696900519  |
| 1                                               | -0.097417827 | -0.082085975 | 3.382964535  | 1                                               | -0.435937276 | 0.004337137  | 3.436896163  |
| 1                                               | -3.960700147 | 2.284930210  | -1.204250782 | 1                                               | -4.010040633 | 2.507237043  | -0.604111923 |
| 1                                               | -3.502755976 | 1.754412026  | -0.914760135 | 1                                               | -3.539170250 | 1.931902838  | -0.461235124 |
| 1                                               | -3.300860039 | -2.070885421 | 0.121920851  | 1                                               | -1.279350030 | -2.703607312 | 0.173528862  |
| 1                                               | -3.714360200 | -2.705175264 | 0.160113160  | 1                                               | -1.272809928 | -3.455414192 | 0.210238946  |
| 1                                               | -2.584159306 | 1.763223885  | 1.680851097  | 1                                               | -2.738982282 | 1.381670155  | 1.934690014  |
| 1                                               | -2.818258325 | 2.288452943  | 2.175024329  | 1                                               | -3.019206506 | 1.795783103  | 2.504037108  |
| 1                                               | -4.381321446 | 0.110944656  | 0.557468123  | 1                                               | -4.396361192 | -0.000558282 | 0.602097874  |
| 1                                               | -5.123220540 | 0.136026070  | 0.721020935  | 1                                               | -5.132917184 | -0.001547314 | 0.785810223  |
|                                                 |              |              |              | 1                                               | -3.534801363 | -1.935687513 | -0.455134768 |
|                                                 |              |              |              | 1                                               | -4.004980111 | -2.512068431 | -0.595990110 |
| <b>C<sub>4</sub>H<sub>46</sub><sup>2-</sup></b> |              |              |              | <b>C<sub>4</sub>H<sub>48</sub><sup>2-</sup></b> |              |              |              |
| SCF Energy = -179.24511 a. u.                   |              |              |              | SCF Energy = -180.41953 a. u.                   |              |              |              |
| 6                                               | -0.700976230 | 0.007486800  | 0.000128061  | 6                                               | 0.645834903  | 0.032385118  | 0.008377934  |
| 6                                               | 0.674418941  | 0.016133027  | -0.000232838 | 6                                               | -0.729431149 | 0.021772998  | 0.005111852  |
| 6                                               | 1.931046100  | 0.016945843  | -0.000485785 | 6                                               | -1.986412328 | 0.005313998  | -0.006825857 |
| 6                                               | -1.958034140 | -0.011304814 | 0.000876318  | 6                                               | 1.903472261  | 0.022131780  | 0.006608895  |
| 1                                               | 4.305450128  | 1.024558064  | 0.001409199  | 1                                               | -4.558785269 | 0.489376241  | -0.304996070 |
| 1                                               | 5.000861531  | 1.324530125  | 0.001984944  | 1                                               | -5.297881312 | 0.610585348  | -0.411350114 |
| 1                                               | 1.628093183  | -1.611813045 | -2.104406154 | 1                                               | -1.513108259 | -1.524038944 | 2.183559958  |
| 1                                               | 1.655956482  | -2.086926371 | -2.689425891 | 1                                               | -1.567663258 | -1.878539016 | 2.846744466  |
| 1                                               | 4.546601492  | -1.237819141 | -1.616732806 | 1                                               | -4.517968241 | -1.626391878 | 1.427338152  |

|                                                 |              |              |              |                                                 |              |              |              |
|-------------------------------------------------|--------------|--------------|--------------|-------------------------------------------------|--------------|--------------|--------------|
| 1                                               | 3.956729201  | -0.949958889 | -1.239054770 | 1                                               | -3.919931273 | -1.289784876 | 1.108009316  |
| 1                                               | 2.731975446  | 3.287696226  | 0.003805843  | 1                                               | -3.495582979 | 2.962068064  | -0.339673055 |
| 1                                               | 2.504768960  | 2.567948491  | 0.002264349  | 1                                               | -3.157636100 | 2.291667166  | -0.252591118 |
| 1                                               | 3.030361034  | 1.386385125  | -2.748836091 | 1                                               | -3.495826400 | 1.108553310  | 2.634462367  |
| 1                                               | 2.747241151  | 1.068243233  | -2.122489199 | 1                                               | -3.159510445 | 0.834054254  | 2.012329313  |
| 1                                               | 4.545007611  | -1.239989826 | 1.617646166  | 1                                               | -4.110897054 | -1.791333252 | -1.812501400 |
| 1                                               | 3.955850237  | -0.950853198 | 1.239846948  | 1                                               | -3.656812174 | -1.367467038 | -1.380188988 |
| 1                                               | 2.892849563  | -3.248796935 | -0.001627749 | 1                                               | -2.567376979 | -3.428534104 | 0.151076930  |
| 1                                               | 2.625450478  | -2.543477218 | -0.001419783 | 1                                               | -2.255513247 | -2.747380325 | 0.075521002  |
| 1                                               | 2.744491017  | 1.065248090  | 2.125563190  | 1                                               | -2.753693409 | 0.770237065  | -2.258314182 |
| 1                                               | 3.026984354  | 1.382298289  | 2.752724486  | 1                                               | -3.056316119 | 1.052918260  | -2.892752194 |
| 1                                               | -0.104882931 | -3.346180366 | -0.003435948 | 1                                               | 0.300121289  | -3.294746454 | 0.337915128  |
| 1                                               | -0.181776089 | -2.598986324 | -0.002705154 | 1                                               | 0.416321205  | -2.559556269 | 0.235378040  |
| 1                                               | 0.269319998  | 2.339632321  | -1.297938968 | 1                                               | -1.314432894 | 2.436070112  | 1.337707168  |
| 1                                               | 0.147460003  | 2.974897437  | -1.679438193 | 1                                               | -1.364527987 | 3.105347037  | 1.676495968  |
| 1                                               | 0.006343248  | 0.423391013  | -3.448528008 | 1                                               | -0.070441959 | 0.940119367  | 3.280400459  |
| 1                                               | -0.007294708 | 0.322305987  | -2.705449378 | 1                                               | 0.015257238  | 0.626272278  | 2.604023033  |
| 1                                               | 1.655537374  | -2.090453338 | 2.686503245  | 1                                               | -1.157583170 | -2.392146283 | -2.420890133 |
| 1                                               | 1.627478279  | -1.614525078 | 2.102145509  | 1                                               | -1.238544114 | -1.747167060 | -2.041307059 |
| 1                                               | -3.158393881 | -3.119767117 | -0.003539667 | 1                                               | 3.253280125  | -3.095776338 | 0.425542118  |
| 1                                               | -2.857133274 | -2.426425327 | -0.002574976 | 1                                               | 2.922124177  | -2.424291155 | 0.333305995  |
| 1                                               | -0.008798101 | 0.316480804  | 2.705913466  | 1                                               | 0.299075106  | 0.477632210  | -2.620146005 |
| 1                                               | 0.005046234  | 0.418934282  | 3.448862449  | 1                                               | 0.180088014  | 0.398868939  | -3.357449195 |
| 1                                               | 0.145357053  | 2.972545244  | 1.682123239  | 1                                               | -0.599556765 | 3.022782157  | -1.470309990 |
| 1                                               | 0.266621194  | 2.337639968  | 1.299806964  | 1                                               | -0.861110029 | 2.394262992  | -1.150762075 |
| 1                                               | -2.910122967 | 1.515341916  | -2.719454054 | 1                                               | 2.969861257  | 1.336794337  | 2.946789129  |
| 1                                               | -2.645695212 | 1.167168157  | -2.100599253 | 1                                               | 2.672297481  | 1.035387147  | 2.322231385  |
| 1                                               | -1.798698870 | -1.566212254 | 2.123808438  | 1                                               | 1.941503171  | -1.789847322 | -1.886905309 |
| 1                                               | -1.854137066 | -2.025307385 | 2.720678041  | 1                                               | 2.091641341  | -2.309626383 | -2.413423442 |
| 1                                               | -2.358620259 | 3.364311037  | 0.000173041  | 1                                               | 2.238840459  | 2.923210049  | -1.967565151 |
| 1                                               | -2.189389904 | 2.628959982  | -0.000189975 | 1                                               | 2.049096019  | 2.386371372  | -1.475673202 |
| 1                                               | -1.797944263 | -1.561645984 | -2.127009960 | 1                                               | 1.736008300  | -1.368259216 | 2.245785381  |
| 1                                               | -1.853695203 | -2.019386421 | -2.724856953 | 1                                               | 1.817658232  | -1.714753895 | 2.911449085  |
| 1                                               | -2.647457372 | 1.166000792  | 2.101697296  | 1                                               | 2.969882424  | 0.385336818  | -2.450140406 |
| 1                                               | -2.912391020 | 1.513613094  | 2.720697091  | 1                                               | 3.299403214  | 0.482292145  | -3.121204363 |
| 1                                               | -4.171374076 | 1.257699801  | 0.000064030  | 1                                               | 3.942776384  | 1.418042095  | -0.009183871 |
| 1                                               | -4.823106130 | 1.644869160  | 0.000311156  | 1                                               | 4.602436572  | 1.796630316  | -0.019136108 |
| 1                                               | -4.044582149 | -0.738981211 | -1.237121156 | 1                                               | 4.061357597  | -0.605714271 | 1.385324124  |
| 1                                               | -4.664752484 | -0.963044913 | -1.611883955 | 1                                               | 4.714612623  | -0.752077819 | 1.736455983  |
| 1                                               | -4.045237270 | -0.740405227 | 1.237073001  | 1                                               | 4.215404269  | -0.863404012 | -0.927504310 |
| 1                                               | -4.665082162 | -0.965310321 | 1.611904064  | 1                                               | 4.845054286  | -1.153913326 | -1.228391319 |
|                                                 |              |              |              | 1                                               | 1.619277090  | 3.341794016  | 1.026267306  |
|                                                 |              |              |              | 1                                               | 1.516538386  | 2.608450130  | 0.888609253  |
| <b>C<sub>4</sub>H<sub>50</sub><sup>2-</sup></b> |              |              |              | <b>C<sub>4</sub>H<sub>52</sub><sup>2-</sup></b> |              |              |              |
| SCF Energy = -181.59434 a. u.                   |              |              |              | SCF Energy = -182.76893 a. u.                   |              |              |              |
| 6                                               | -0.680482254 | 0.020733165  | -0.000859913 | 6                                               | 0.567265000  | -0.145914000 | 0.012260000  |
| 6                                               | 0.695361131  | 0.022630265  | 0.004814984  | 6                                               | -0.804352000 | -0.029560000 | 0.013538000  |
| 6                                               | 1.952932342  | 0.020436825  | 0.003734933  | 6                                               | -2.057443000 | 0.079515000  | 0.006029000  |
| 6                                               | -1.938268311 | 0.013796180  | -0.018103154 | 6                                               | 1.820498000  | -0.254075000 | 0.005086000  |
| 1                                               | 4.930148633  | -0.337242015 | 1.303456170  | 1                                               | -5.085824000 | 0.742392000  | 1.301077000  |
| 1                                               | 4.248857267  | -0.248294199 | 0.979295946  | 1                                               | -4.407104000 | 0.589594000  | 1.002739000  |
| 1                                               | 4.749155726  | 1.548912921  | -1.230392138 | 1                                               | -5.131773000 | -0.914071000 | -1.210269000 |
| 1                                               | 4.130962397  | 1.217342098  | -0.950343071 | 1                                               | -4.461081000 | -0.696751000 | -0.940501000 |
| 1                                               | 4.485930263  | -1.287518410 | -1.886166048 | 1                                               | -4.450562000 | 1.964584000  | -1.545833000 |

|                                                |              |              |              |                                                |              |              |              |
|------------------------------------------------|--------------|--------------|--------------|------------------------------------------------|--------------|--------------|--------------|
| 1                                              | 3.957647323  | -1.037558361 | -1.408181935 | 1                                              | -3.927434000 | 1.547232000  | -1.195838000 |
| 1                                              | 3.212975340  | -2.355136156 | 0.339233309  | 1                                              | -2.985333000 | 2.474988000  | 0.751841000  |
| 1                                              | 3.555890135  | -3.020134154 | 0.431422336  | 1                                              | -3.259112000 | 3.147842000  | 0.954658000  |
| 1                                              | -0.441768809 | 2.332876315  | -2.480497188 | 1                                              | -0.332071000 | -2.188644000 | -2.607250000 |
| 1                                              | -0.626682920 | 1.820815304  | -1.962507275 | 1                                              | -0.319473000 | -1.705885000 | -2.032549000 |
| 1                                              | 3.208499558  | 1.951741164  | 1.115689265  | 1                                              | -3.506345000 | -1.658613000 | 1.096065000  |
| 1                                              | 3.548563146  | 2.554567185  | 1.421244147  | 1                                              | -3.941011000 | -2.186011000 | 1.423511000  |
| 1                                              | 1.610358337  | 1.148579219  | 3.367606224  | 1                                              | -1.375508000 | -1.825609000 | 3.064806000  |
| 1                                              | 1.515791187  | 1.002290285  | 2.635803302  | 1                                              | -1.373405000 | -1.435453000 | 2.422932000  |
| 1                                              | 2.423594229  | 0.586567051  | -3.235851143 | 1                                              | -2.725137000 | -0.067331000 | -3.229836000 |
| 1                                              | 2.294832175  | 0.466161764  | -2.500733984 | 1                                              | -2.508789000 | -0.027763000 | -2.506308000 |
| 1                                              | -3.635595341 | 2.095953077  | -1.959043281 | 1                                              | 4.678551000  | -1.442488000 | -1.540148000 |
| 1                                              | -3.213671208 | 1.648583455  | -1.518631282 | 1                                              | 4.058892000  | -1.181780000 | -1.197187000 |
| 1                                              | -1.399814056 | -2.423496331 | -1.169927288 | 1                                              | 1.415733000  | 2.422796000  | -0.788487000 |
| 1                                              | -1.333851053 | -3.094737033 | -1.505074290 | 1                                              | 1.459926000  | 3.136545000  | -1.022650000 |
| 1                                              | 0.645832257  | -3.219001081 | 1.047244951  | 1                                              | -0.313259000 | 2.987542000  | 1.486465000  |
| 1                                              | 0.753397058  | -2.542508294 | 0.738273172  | 1                                              | -0.528624000 | 2.339859000  | 1.172156000  |
| 1                                              | -1.754226285 | 1.774234476  | 2.941905352  | 1                                              | 1.461562000  | -2.619016000 | 2.462388000  |
| 1                                              | -1.679513866 | 1.431435042  | 2.274662055  | 1                                              | 1.428484000  | -2.101990000 | 1.914703000  |
| 1                                              | -3.012410283 | -0.667159158 | -2.207689911 | 1                                              | 3.187742000  | 0.977348000  | -1.729303000 |
| 1                                              | -3.348401323 | -0.819982902 | -2.868638116 | 1                                              | 3.599803000  | 1.348577000  | -2.245258000 |
| 1                                              | -2.122042044 | -3.092630908 | 1.619724245  | 1                                              | 2.646089000  | 2.494919000  | 1.803086000  |
| 1                                              | -2.000388957 | -2.430180898 | 1.284047007  | 1                                              | 2.388382000  | 1.903755000  | 1.410774000  |
| 1                                              | -1.741991178 | 2.874966547  | 0.028168105  | 1                                              | 2.033839000  | -2.720216000 | -0.677156000 |
| 1                                              | -2.040554040 | 3.561213129  | 0.098447077  | 1                                              | 2.176855000  | -3.433381000 | -0.883304000 |
| 1                                              | -3.732645390 | -2.072956092 | -0.359127198 | 1                                              | 4.173082000  | 3.270623000  | -0.371557000 |
| 1                                              | -4.094978344 | -2.726507986 | -0.453266773 | 1                                              | 4.619234000  | 3.868326000  | -0.423469000 |
| 1                                              | -3.557858145 | -0.573947761 | 1.777528076  | 1                                              | 2.999568000  | -0.187648000 | 2.415100000  |
| 1                                              | -4.066042403 | -0.765677674 | 2.307605455  | 1                                              | 3.339977000  | -0.169563000 | 3.087774000  |
| 1                                              | -3.752268341 | 1.675638171  | 0.915541200  | 1                                              | 3.716526000  | -1.885835000 | 0.973961000  |
| 1                                              | -4.270178348 | 2.172638269  | 1.151103924  | 1                                              | 4.250573000  | -2.346128000 | 1.243737000  |
| 1                                              | -4.562345045 | 0.041216028  | -0.453839872 | 1                                              | 4.206986000  | 0.499545000  | 0.446568000  |
| 1                                              | -5.304555296 | -0.039842813 | -0.571332038 | 1                                              | 4.914006000  | 0.738924000  | 0.582701000  |
| 1                                              | -0.512353117 | -1.145107287 | 3.228427315  | 1                                              | 0.404569000  | 0.588246000  | 3.321684000  |
| 1                                              | -0.633227784 | -0.827959191 | 2.558339161  | 1                                              | 0.582128000  | 0.434767000  | 2.607781000  |
| 1                                              | -0.309722152 | -0.711174005 | -3.358091087 | 1                                              | 0.331932000  | 1.033158000  | -3.176899000 |
| 1                                              | -0.424618175 | -0.587366108 | -2.626788238 | 1                                              | 0.460913000  | 0.768816000  | -2.485503000 |
| 1                                              | 0.712545103  | 2.504502255  | 0.916186267  | 1                                              | -0.823641000 | -2.690154000 | 0.315876000  |
| 1                                              | 0.608732169  | 3.175941399  | 1.237467238  | 1                                              | -0.741142000 | -3.427617000 | 0.432283000  |
| 1                                              | 2.402072061  | -1.275656373 | 2.304502360  | 1                                              | -2.456029000 | 0.805646000  | 2.464717000  |
| 1                                              | 2.548268389  | -1.616987340 | 2.960660452  | 1                                              | -2.642156000 | 1.032659000  | 3.160729000  |
| 1                                              | 1.732331047  | -2.081332439 | -1.690956265 | 1                                              | -1.592329000 | 2.347951000  | -1.361489000 |
| 1                                              | 1.798558109  | -2.741957316 | -2.047576222 | 1                                              | -1.591292000 | 3.008064000  | -1.725568000 |
| 1                                              | 2.102860427  | 2.508998145  | -1.077983270 | 1                                              | -2.725134000 | -2.233582000 | -1.227508000 |
| 1                                              | 2.216642532  | 3.181301965  | -1.398469945 | 1                                              | -2.979981000 | -2.864136000 | -1.551806000 |
|                                                |              |              |              | 1                                              | 2.331399000  | -1.292122000 | -3.282964000 |
|                                                |              |              |              | 1                                              | 2.160993000  | -1.072715000 | -2.582950000 |
| <b>C<sub>6</sub>H<sub>2</sub><sup>2-</sup></b> |              |              |              | <b>C<sub>6</sub>H<sub>4</sub><sup>2-</sup></b> |              |              |              |
| SCF Energy = -229.562777 a. u.                 |              |              |              | SCF Energy = -230.741051 a. u.                 |              |              |              |
| 6                                              | 3.553921000  | 0.037988000  | 0.001673000  | 6                                              | -3.239638000 | -0.025415000 | 0.056340000  |
| 6                                              | 2.293866000  | 0.018342000  | -0.000580000 | 6                                              | -1.981176000 | -0.028805000 | 0.036473000  |
| 6                                              | 0.931593000  | -0.003745000 | -0.001060000 | 6                                              | -0.619381000 | -0.029732000 | 0.011298000  |
| 6                                              | -0.307607000 | -0.023351000 | -0.001285000 | 6                                              | 0.619343000  | -0.029696000 | -0.011272000 |
| 6                                              | -1.670166000 | -0.044347000 | -0.000227000 | 6                                              | 1.981133000  | -0.028661000 | -0.036538000 |

|                                                 |              |              |              |                                                 |              |              |              |
|-------------------------------------------------|--------------|--------------|--------------|-------------------------------------------------|--------------|--------------|--------------|
| 6                                               | -2.928802000 | -0.060740000 | 0.001231000  | 6                                               | 3.239597000  | -0.025113000 | -0.056486000 |
| 1                                               | -5.233107000 | 0.176482000  | 0.005349000  | 1                                               | 5.555694000  | 0.201252000  | 0.088693000  |
| 1                                               | -6.003731000 | 0.278636000  | -0.003866000 | 1                                               | 6.320571000  | 0.300361000  | 0.171358000  |
| <b>C<sub>6</sub>H<sub>6</sub><sup>2-</sup></b>  |              |              |              | <b>C<sub>6</sub>H<sub>8</sub><sup>2-</sup></b>  |              |              |              |
| SCF Energy = -231.91824 a. u.                   |              |              |              | SCF Energy = -233.095534 a. u.                  |              |              |              |
| 6                                               | -3.487480000 | -0.089116000 | -0.020442000 | 6                                               | -3.238333000 | -0.047636000 | -0.062861000 |
| 6                                               | -2.228935000 | -0.102031000 | -0.025719000 | 6                                               | -1.980859000 | -0.064039000 | -0.075606000 |
| 6                                               | -0.867632000 | -0.107686000 | -0.028952000 | 6                                               | -0.620073000 | -0.081394000 | -0.082369000 |
| 6                                               | 0.371056000  | -0.109615000 | -0.030271000 | 6                                               | 0.618229000  | -0.095476000 | -0.084983000 |
| 6                                               | 1.732558000  | -0.105661000 | -0.030090000 | 6                                               | 1.979081000  | -0.106963000 | -0.083511000 |
| 6                                               | 2.990353000  | -0.101957000 | -0.026444000 | 6                                               | 3.236757000  | -0.120444000 | -0.078321000 |
| 1                                               | 5.251368000  | -0.741930000 | 0.212218000  | 1                                               | 5.514857000  | -0.767310000 | 0.068646000  |
| 1                                               | 5.999388000  | -0.897970000 | 0.313229000  | 1                                               | 6.262935000  | -0.925148000 | 0.159219000  |
| 1                                               | 5.159418000  | 2.142983000  | -0.012658000 | 1                                               | 5.346989000  | 2.032238000  | 0.740176000  |
| 1                                               | 4.620694000  | 1.595655000  | -0.017980000 | 1                                               | 4.827560000  | 1.506942000  | 0.533021000  |
| 1                                               | -5.690732000 | 0.649176000  | 0.194290000  | 1                                               | -5.061810000 | 1.433841000  | -0.158445000 |
| 1                                               | -6.399655000 | 0.948488000  | 0.282412000  | 1                                               | -5.626526000 | 1.955352000  | -0.171579000 |
| <b>C<sub>6</sub>H<sub>10</sub><sup>2-</sup></b> |              |              |              | <b>C<sub>6</sub>H<sub>12</sub><sup>2-</sup></b> |              |              |              |
| SCF Energy = -234.27332 a. u.                   |              |              |              | SCF Energy = -235.450842 a. u.                  |              |              |              |
| 6                                               | -3.011466000 | -0.083604000 | -0.072165000 | 6                                               | 3.238552064  | -0.103663706 | -0.077158276 |
| 6                                               | -1.755472000 | -0.047012000 | -0.048486000 | 6                                               | 1.982374176  | -0.094332195 | -0.043276115 |
| 6                                               | -0.395573000 | -0.011087000 | -0.027358000 | 6                                               | 0.622773887  | -0.089693956 | -0.009520957 |
| 6                                               | 0.841879000  | 0.022573000  | -0.007561000 | 6                                               | -0.614616091 | -0.082117196 | 0.021966677  |
| 6                                               | 2.201628000  | 0.057697000  | 0.013605000  | 6                                               | -1.974232255 | -0.073148700 | 0.054474035  |
| 6                                               | 3.458571000  | 0.092352000  | 0.031085000  | 6                                               | -3.230464119 | -0.067353151 | 0.086858095  |
| 1                                               | 5.583265000  | 1.122787000  | -0.032876000 | 1                                               | -5.215579433 | -1.068367061 | -0.759374115 |
| 1                                               | 6.272849000  | 1.462482000  | -0.069929000 | 1                                               | -5.852578663 | -1.380994925 | -1.048026016 |
| 1                                               | 5.869561000  | -1.886625000 | 0.063961000  | 1                                               | -5.260750532 | 0.219815996  | 1.326796062  |
| 1                                               | 5.301786000  | -1.369200000 | 0.059035000  | 1                                               | -5.932684457 | 0.318531366  | 1.680235134  |
| 1                                               | -5.367943000 | -0.386568000 | 1.983733000  | 1                                               | -5.422371318 | 1.901405295  | -1.037026009 |
| 1                                               | -4.808648000 | -0.337557000 | 1.463350000  | 1                                               | -4.892327277 | 1.410929424  | -0.786892390 |
| 1                                               | -5.029663000 | -0.962846000 | -0.967392000 | 1                                               | 5.515021259  | 0.720502342  | 1.929046868  |
| 1                                               | -5.674311000 | -1.254582000 | -1.263428000 | 1                                               | 4.973480312  | 0.510438024  | 1.431575803  |
| 1                                               | -4.812238000 | 1.452801000  | -0.268208000 | 1                                               | 4.984338500  | 1.277791074  | -0.926686202 |
| 1                                               | -5.372060000 | 1.973792000  | -0.302960000 | 1                                               | 5.530329298  | 1.754926915  | -1.170748041 |
| <b>C<sub>6</sub>H<sub>14</sub><sup>2-</sup></b> |              |              |              | <b>C<sub>6</sub>H<sub>16</sub><sup>2-</sup></b> |              |              |              |
| SCF Energy = -236.627811 a. u.                  |              |              |              | SCF Energy = -237.803696 a. u.                  |              |              |              |
| 6                                               | 3.411267051  | -0.133527824 | -0.092383235 | 6                                               | 3.260519799  | -0.047606902 | -0.026644074 |
| 6                                               | 2.154709214  | -0.117192123 | -0.106394261 | 6                                               | 2.004256714  | -0.056584923 | -0.056111839 |
| 6                                               | 0.795423257  | -0.104371746 | -0.124563033 | 6                                               | 0.645311546  | -0.065188287 | -0.083814797 |
| 6                                               | -0.442103779 | -0.087416906 | -0.137283925 | 6                                               | -0.591896395 | -0.073293166 | -0.108090274 |
| 6                                               | -1.801522030 | -0.068300908 | -0.147313950 | 6                                               | -1.951104563 | -0.078279074 | -0.126997248 |
| 6                                               | -3.057800991 | -0.044420726 | -0.159163287 | 6                                               | -3.207262342 | -0.075978211 | -0.144765962 |
| 1                                               | -4.760676444 | 0.191434103  | 1.532823286  | 1                                               | -4.982657833 | 0.111430970  | 1.478817044  |

|                                                 |              |              |              |                                                 |              |              |              |
|-------------------------------------------------|--------------|--------------|--------------|-------------------------------------------------|--------------|--------------|--------------|
| 1                                               | -5.301562269 | 0.242277983  | 2.067711945  | 1                                               | -5.530182716 | 0.163304628  | 2.007783151  |
| 1                                               | -5.380945207 | 0.200880975  | -0.847155095 | 1                                               | -5.507994843 | 0.199467543  | -0.910661128 |
| 1                                               | -6.123418459 | 0.304924102  | -0.993175207 | 1                                               | -6.243594612 | 0.302285624  | -1.085347300 |
| 1                                               | -5.106007463 | -2.424145102 | 0.355687017  | 1                                               | -5.281697484 | -2.481277195 | 0.112527954  |
| 1                                               | -4.589754310 | -1.882197219 | 0.211440178  | 1                                               | -4.757204512 | -1.931220199 | 0.058761958  |
| 1                                               | -4.109087268 | 2.135691113  | 0.052135072  | 1                                               | -4.254430562 | 2.121235049  | 0.026882733  |
| 1                                               | -4.450742092 | 2.810615418  | 0.134290898  | 1                                               | -4.599181602 | 2.794978231  | 0.098050723  |
| 1                                               | 6.409131310  | -0.894921809 | -0.790517254 | 1                                               | 5.597781934  | 0.055748823  | -2.177274391 |
| 1                                               | 5.669664314  | -0.750290787 | -0.653658259 | 1                                               | 5.054132217  | 0.048645148  | -1.641028921 |
| 1                                               | 5.063014457  | -0.153034885 | 1.649983129  | 1                                               | 5.021151245  | -1.679555141 | 0.210918939  |
| 1                                               | 5.601042725  | -0.148296103 | 2.191846874  | 1                                               | 5.558521216  | -2.216656291 | 0.282557896  |
| 1                                               | 5.089355313  | 1.579672936  | -0.152790935 | 1                                               | 4.954853273  | 2.622763316  | 0.064633709  |
| 1                                               | 5.630151707  | 2.118772258  | -0.156013095 | 1                                               | 4.583659246  | 1.956593190  | 0.052417123  |
|                                                 |              |              |              | 1                                               | 4.532176121  | 0.129437813  | 2.016039904  |
|                                                 |              |              |              | 1                                               | 4.895716128  | 0.184401338  | 2.683465238  |
| <b>C<sub>6</sub>H<sub>18</sub><sup>2-</sup></b> |              |              |              | <b>C<sub>6</sub>H<sub>20</sub><sup>2-</sup></b> |              |              |              |
| SCF Energy = -238.980987 a. u.                  |              |              |              | SCF Energy = -240.157664 a. u.                  |              |              |              |
| 6                                               | 3.379667231  | -0.006554919 | 0.015886959  | 6                                               | 3.225069000  | 0.118329000  | -0.000542000 |
| 6                                               | 2.123321066  | 0.001941022  | 0.003502624  | 6                                               | 1.968843000  | 0.121373000  | 0.019277000  |
| 6                                               | 0.764786011  | 0.010844959  | -0.009803009 | 6                                               | 0.610553000  | 0.121014000  | 0.026789000  |
| 6                                               | -0.472348904 | 0.018675194  | -0.022230207 | 6                                               | -0.626678000 | 0.118202000  | 0.033906000  |
| 6                                               | -1.831012020 | 0.027140972  | -0.035066989 | 6                                               | -1.984946000 | 0.112501000  | 0.038365000  |
| 6                                               | -3.087326964 | 0.038591309  | -0.055686380 | 6                                               | -3.241212000 | 0.105769000  | 0.050706000  |
| 1                                               | -4.582629467 | -1.755016346 | 0.627588871  | 1                                               | -4.835452000 | 0.172578000  | -1.802206000 |
| 1                                               | -5.062223337 | -2.308348949 | 0.834255871  | 1                                               | -5.363188000 | 0.183472000  | -2.349543000 |
| 1                                               | -5.491850174 | 0.254008255  | -0.532986267 | 1                                               | -5.672249000 | 0.038691000  | 0.495127000  |
| 1                                               | -6.239727384 | 0.312212989  | -0.666633156 | 1                                               | -6.419546000 | -0.045626000 | 0.613943000  |
| 1                                               | -4.384540431 | -1.782455245 | -2.366813510 | 1                                               | -4.871212000 | 2.826587000  | -0.345863000 |
| 1                                               | -4.057762367 | -1.349806806 | -1.834902531 | 1                                               | -4.511021000 | 2.164344000  | -0.245797000 |
| 1                                               | -4.454074321 | 2.940395080  | 0.098828085  | 1                                               | -4.370352000 | -1.497327000 | 2.612700000  |
| 1                                               | -4.110933038 | 2.263979024  | 0.054876739  | 1                                               | -4.078047000 | -1.147580000 | 2.006098000  |
| 1                                               | -4.616463473 | 0.472020285  | 1.784689961  | 1                                               | -4.459462000 | -1.950401000 | -0.430380000 |
| 1                                               | -5.104329442 | 0.608959186  | 2.352447935  | 1                                               | -4.813866000 | -2.610962000 | -0.554903000 |
| 1                                               | 5.167598403  | 2.289998141  | -1.272876075 | 1                                               | 5.586775000  | 0.331916000  | 2.156666000  |
| 1                                               | 4.728451137  | 1.747446466  | -0.968776432 | 1                                               | 5.039680000  | 0.299347000  | 1.628975000  |
| 1                                               | 5.463536546  | -0.637523116 | -1.049321442 | 1                                               | 3.997451000  | -1.960868000 | -2.368756000 |
| 1                                               | 6.126921612  | -0.830201844 | -1.373301217 | 1                                               | 3.785378000  | -1.457345000 | -1.843722000 |
| 1                                               | 6.118558495  | 0.765363343  | 1.451034180  | 1                                               | 4.642352000  | 2.125092000  | 0.033931000  |
| 1                                               | 5.456547702  | 0.585316076  | 1.117110106  | 1                                               | 5.154691000  | 2.686345000  | 0.045719000  |
| 1                                               | 4.677874493  | -1.785154049 | 1.026935128  | 1                                               | 5.088376000  | -2.410193000 | 0.719196000  |
| 1                                               | 5.102527593  | -2.335023187 | 1.338224174  | 1                                               | 4.596611000  | -1.860112000 | 0.540318000  |
|                                                 |              |              |              | 1                                               | 5.549583000  | 0.001616000  | -0.809328000 |
|                                                 |              |              |              | 1                                               | 6.243720000  | -0.072697000 | -1.113186000 |
| <b>C<sub>6</sub>H<sub>22</sub><sup>2-</sup></b> |              |              |              | <b>C<sub>6</sub>H<sub>24</sub><sup>2-</sup></b> |              |              |              |
| SCF Energy = -241.333074 a. u.                  |              |              |              | SCF Energy = -242.51064 a. u.                   |              |              |              |
| 6                                               | -3.445564087 | -0.087470883 | 0.017745959  | 6                                               | -3.258626000 | -0.046764000 | -0.004300000 |
| 6                                               | -2.188737957 | -0.108382909 | 0.008311258  | 6                                               | -2.002201000 | -0.038852000 | -0.004514000 |
| 6                                               | -0.831028948 | -0.115254805 | -0.003222160 | 6                                               | -0.644637000 | -0.030267000 | -0.004419000 |
| 6                                               | 0.406083212  | -0.115402974 | -0.012873824 | 6                                               | 0.592132000  | -0.022543000 | -0.004292000 |
| 6                                               | 1.763880065  | -0.113332833 | -0.023451019 | 6                                               | 1.949680000  | -0.014092000 | -0.003722000 |
| 6                                               | 3.019954234  | -0.101796240 | -0.030955811 | 6                                               | 3.205841000  | -0.005430000 | -0.002167000 |
| 1                                               | 4.177273344  | 0.782936261  | -2.019779070 | 1                                               | 4.432951000  | -2.124762000 | -0.344398000 |

|                                                 |              |              |              |                                                 |              |              |              |
|-------------------------------------------------|--------------|--------------|--------------|-------------------------------------------------|--------------|--------------|--------------|
| 1                                               | 4.518339194  | 1.071810946  | -2.632785404 | 1                                               | 4.827407000  | -2.764664000 | -0.446132000 |
| 1                                               | 5.483393393  | 0.226788964  | 0.067859045  | 1                                               | 5.693606000  | 0.029862000  | 0.009649000  |
| 1                                               | 6.230212248  | 0.338509924  | 0.154484831  | 1                                               | 6.453796000  | 0.040903000  | 0.013380000  |
| 1                                               | 4.939067387  | -2.054809016 | -1.720282210 | 1                                               | 4.793582000  | -1.269749000 | 2.510199000  |
| 1                                               | 4.489768385  | -1.609806934 | -1.300232952 | 1                                               | 4.405627000  | -0.978099000 | 1.927240000  |
| 1                                               | 4.861786341  | -2.149313194 | 1.626247942  | 1                                               | 4.748101000  | 2.004211000  | 2.005282000  |
| 1                                               | 4.420538242  | -1.690990133 | 1.211898981  | 1                                               | 4.372136000  | 1.537705000  | 1.540291000  |
| 1                                               | 4.379514305  | 0.906612922  | 2.717696127  | 1                                               | 4.758207000  | 2.531857000  | -1.264385000 |
| 1                                               | 4.050085063  | 0.646313279  | 2.085791286  | 1                                               | 4.378963000  | 1.943166000  | -0.972990000 |
| 1                                               | 3.930762473  | 2.205400161  | 0.066140277  | 1                                               | 4.416699000  | -0.321617000 | -2.136668000 |
| 1                                               | 4.263152462  | 2.884970114  | 0.109715907  | 1                                               | 4.808360000  | -0.415986000 | -2.779355000 |
| 1                                               | -5.431817661 | -1.948977800 | 1.701922935  | 1                                               | -3.845095000 | 3.172779000  | -0.041574000 |
| 1                                               | -4.984041632 | -1.502961285 | 1.278468950  | 1                                               | -3.659633000 | 2.439246000  | -0.031735000 |
| 1                                               | -4.087209493 | 3.107177461  | -0.165120765 | 1                                               | -5.791724000 | 1.096254000  | 1.631565000  |
| 1                                               | -3.950999269 | 2.367510436  | -0.078309766 | 1                                               | -5.195611000 | 0.824380000  | 1.246416000  |
| 1                                               | -4.913881196 | -1.601076039 | -1.224110804 | 1                                               | -4.197353000 | -1.610604000 | -2.694991000 |
| 1                                               | -5.354029664 | -2.056839999 | -1.643997076 | 1                                               | -3.942702000 | -1.253898000 | -2.077148000 |
| 1                                               | -4.980029410 | 1.189885207  | 2.530394369  | 1                                               | -3.910339000 | -1.206569000 | 2.108777000  |
| 1                                               | -4.647289106 | 0.887668906  | 1.917742055  | 1                                               | -4.156802000 | -1.549481000 | 2.737465000  |
| 1                                               | -4.701421293 | 0.783201908  | -1.899351029 | 1                                               | -5.820896000 | 1.057943000  | -1.622433000 |
| 1                                               | -5.040690586 | 1.065833360  | -2.517718986 | 1                                               | -5.217855000 | 0.794704000  | -1.242054000 |
|                                                 |              |              |              | 1                                               | -5.375305000 | -1.321085000 | 0.027064000  |
|                                                 |              |              |              | 1                                               | -6.029249000 | -1.708803000 | 0.037018000  |
| <b>C<sub>6</sub>H<sub>26</sub><sup>2-</sup></b> |              |              |              | <b>C<sub>6</sub>H<sub>28</sub><sup>2-</sup></b> |              |              |              |
| SCF Energy = -243.686785 a. u.                  |              |              |              | SCF Energy = -244.863086 a. u.                  |              |              |              |
| 6                                               | -3.370047000 | -0.054299000 | -0.112278000 | 6                                               | -3.231419000 | -0.048909000 | 0.030048000  |
| 6                                               | -2.113817000 | -0.043025000 | -0.108858000 | 6                                               | -1.975051000 | -0.033782000 | 0.030096000  |
| 6                                               | -0.756738000 | -0.025532000 | -0.103893000 | 6                                               | -0.618234000 | -0.012588000 | 0.029170000  |
| 6                                               | 0.479904000  | -0.005965000 | -0.096663000 | 6                                               | 0.618055000  | 0.010944000  | 0.029153000  |
| 6                                               | 1.837038000  | 0.017283000  | -0.087379000 | 6                                               | 1.974874000  | 0.032089000  | 0.030115000  |
| 6                                               | 3.093226000  | 0.038772000  | -0.074229000 | 6                                               | 3.231245000  | 0.047186000  | 0.030119000  |
| 1                                               | 4.414325000  | 1.147413000  | -1.857046000 | 1                                               | 4.304628000  | 1.478830000  | -1.700955000 |
| 1                                               | 4.845671000  | 1.545311000  | -2.337072000 | 1                                               | 4.655115000  | 1.908960000  | -2.216788000 |
| 1                                               | 5.527546000  | 0.575047000  | 0.284875000  | 1                                               | 5.701230000  | 0.443344000  | 0.137815000  |
| 1                                               | 6.265499000  | 0.708782000  | 0.400227000  | 1                                               | 6.448060000  | 0.576158000  | 0.174437000  |
| 1                                               | 5.489594000  | -1.565516000 | -1.565172000 | 1                                               | 5.196564000  | -1.355417000 | -2.138488000 |
| 1                                               | 4.899010000  | -1.217159000 | -1.240316000 | 1                                               | 4.734238000  | -1.021709000 | -1.638788000 |
| 1                                               | 5.002772000  | -1.937526000 | 1.645710000  | 1                                               | 5.211991000  | -2.327123000 | 1.011942000  |
| 1                                               | 4.560050000  | -1.488206000 | 1.225434000  | 1                                               | 4.744769000  | -1.772502000 | 0.790703000  |
| 1                                               | 4.238892000  | 0.912520000  | 2.844694000  | 1                                               | 4.686399000  | 0.328229000  | 2.918887000  |
| 1                                               | 3.918531000  | 0.749107000  | 2.178535000  | 1                                               | 4.326376000  | 0.263822000  | 2.255368000  |
| 1                                               | 2.903619000  | -3.327613000 | -0.485320000 | 1                                               | 2.703613000  | -3.198407000 | -1.001015000 |
| 1                                               | 2.807866000  | -2.587112000 | -0.379256000 | 1                                               | 2.720908000  | -2.482207000 | -0.767032000 |
| 1                                               | 3.845322000  | 2.405777000  | 0.258447000  | 1                                               | 4.070666000  | 2.299155000  | 0.718530000  |
| 1                                               | 4.157003000  | 3.088070000  | 0.359632000  | 1                                               | 4.355072000  | 2.971008000  | 0.920603000  |
| 1                                               | -3.633305000 | -1.072650000 | 3.012261000  | 1                                               | -4.363335000 | -2.970345000 | 0.916852000  |
| 1                                               | -3.520275000 | -0.783740000 | 2.322958000  | 1                                               | -4.077210000 | -2.299118000 | 0.715065000  |
| 1                                               | -6.098240000 | -1.427759000 | 0.970098000  | 1                                               | -4.686991000 | -0.330343000 | 2.918280000  |
| 1                                               | -5.468183000 | -1.107703000 | 0.691431000  | 1                                               | -4.326970000 | -0.265952000 | 2.254751000  |
| 1                                               | -3.843851000 | 3.083481000  | -0.923938000 | 1                                               | -6.449847000 | -0.567133000 | 0.175135000  |
| 1                                               | -3.710503000 | 2.351978000  | -0.785067000 | 1                                               | -5.702677000 | -0.436237000 | 0.138445000  |
| 1                                               | -4.537930000 | -1.677163000 | -1.555602000 | 1                                               | -2.694235000 | 3.197355000  | -1.002563000 |
| 1                                               | -4.951980000 | -2.138108000 | -1.993300000 | 1                                               | -2.714207000 | 2.481100000  | -0.769054000 |
| 1                                               | -5.403295000 | 1.673009000  | 1.689608000  | 1                                               | -4.308919000 | -1.475882000 | -1.702155000 |

|                                                 |              |              |              |                                                 |              |              |              |
|-------------------------------------------------|--------------|--------------|--------------|-------------------------------------------------|--------------|--------------|--------------|
| 1                                               | -4.946383000 | 1.247790000  | 1.257686000  | 1                                               | -4.660700000 | -1.905082000 | -2.217894000 |
| 1                                               | -5.554560000 | 0.562512000  | -1.097591000 | 1                                               | -5.203164000 | 2.330439000  | 1.015301000  |
| 1                                               | -6.224594000 | 0.716056000  | -1.422112000 | 1                                               | -4.737925000 | 1.774595000  | 0.792923000  |
| <b>C<sub>6</sub>H<sub>30</sub><sup>2-</sup></b> |              |              |              | <b>C<sub>6</sub>H<sub>32</sub><sup>2-</sup></b> |              |              |              |
| SCF Energy = -246.039926 a. u.                  |              |              |              | SCF Energy = -247.214454 a. u.                  |              |              |              |
| 6                                               | 3.328567000  | -0.050734000 | -0.028845000 | 6                                               | -3.298652000 | -0.126981000 | 0.137720000  |
| 6                                               | 2.072601000  | -0.070960000 | -0.038660000 | 6                                               | -2.042012000 | -0.147349000 | 0.100521000  |
| 6                                               | 0.716140000  | -0.087465000 | -0.039583000 | 6                                               | -0.686778000 | -0.154008000 | 0.051276000  |
| 6                                               | -0.520319000 | -0.105893000 | -0.035222000 | 6                                               | 0.548980000  | -0.162890000 | 0.007115000  |
| 6                                               | -1.876942000 | -0.122987000 | -0.025098000 | 6                                               | 1.904385000  | -0.171482000 | -0.037031000 |
| 6                                               | -3.133428000 | -0.130391000 | -0.012922000 | 6                                               | 3.160305000  | -0.163771000 | -0.072851000 |
| 1                                               | -4.813328000 | -0.290646000 | -1.864504000 | 1                                               | 4.235864000  | 0.735206000  | 1.997579000  |
| 1                                               | -5.343314000 | -0.312087000 | -2.405346000 | 1                                               | 4.562304000  | 1.024388000  | 2.615950000  |
| 1                                               | -5.553972000 | -0.653463000 | 0.465753000  | 1                                               | 5.601225000  | -0.613016000 | 0.351911000  |
| 1                                               | -6.289783000 | -0.786131000 | 0.593050000  | 1                                               | 6.339021000  | -0.739517000 | 0.473993000  |
| 1                                               | -5.474353000 | 2.121863000  | -0.295597000 | 1                                               | 5.419849000  | 2.174338000  | -0.311832000 |
| 1                                               | -4.938885000 | 1.587550000  | -0.253280000 | 1                                               | 4.889627000  | 1.634539000  | -0.276983000 |
| 1                                               | -4.519667000 | 1.062726000  | 2.667185000  | 1                                               | 5.310307000  | -0.223154000 | -2.503838000 |
| 1                                               | -4.194708000 | 0.773947000  | 2.047155000  | 1                                               | 4.784147000  | -0.216556000 | -1.958373000 |
| 1                                               | -2.960347000 | 1.578072000  | -2.038789000 | 1                                               | 2.563186000  | 2.413157000  | 0.680884000  |
| 1                                               | -3.038468000 | 1.951697000  | -2.688837000 | 1                                               | 2.483840000  | 3.095986000  | 0.987207000  |
| 1                                               | -3.964099000 | -2.266961000 | 2.316264000  | 1                                               | 4.486040000  | -3.023729000 | -0.861515000 |
| 1                                               | -3.751005000 | -1.762514000 | 1.794841000  | 1                                               | 4.155860000  | -2.358241000 | -0.715872000 |
| 1                                               | -2.702809000 | 3.215589000  | 0.728543000  | 1                                               | 2.914739000  | 2.177981000  | -2.511697000 |
| 1                                               | -2.618630000 | 2.477844000  | 0.603277000  | 1                                               | 2.898423000  | 1.646527000  | -1.977396000 |
| 1                                               | -4.078422000 | -2.352202000 | -0.644452000 | 1                                               | 3.850077000  | -1.776726000 | 1.729702000  |
| 1                                               | -4.406142000 | -3.019371000 | -0.787902000 | 1                                               | 4.073631000  | -2.276334000 | 2.251164000  |
| 1                                               | 3.820389000  | 3.068095000  | 0.869952000  | 1                                               | -3.892710000 | 1.538297000  | -2.624726000 |
| 1                                               | 3.691069000  | 2.338037000  | 0.723625000  | 1                                               | -3.748112000 | 1.190680000  | -1.969479000 |
| 1                                               | 4.226032000  | 0.412072000  | 3.064110000  | 1                                               | -3.253186000 | -1.761883000 | -2.809376000 |
| 1                                               | 4.063124000  | 0.296788000  | 2.334163000  | 1                                               | -3.176193000 | -1.418464000 | -2.142287000 |
| 1                                               | 6.351460000  | 1.056846000  | 0.475860000  | 1                                               | -2.767095000 | 2.540124000  | 0.144970000  |
| 1                                               | 5.666812000  | 0.749787000  | 0.361370000  | 1                                               | -2.670357000 | 3.281577000  | 0.232389000  |
| 1                                               | 3.369500000  | -3.283252000 | -0.924066000 | 1                                               | -5.991660000 | -0.728127000 | -1.614065000 |
| 1                                               | 3.261251000  | -2.550221000 | -0.781369000 | 1                                               | -5.433887000 | -0.555070000 | -1.130709000 |
| 1                                               | 4.380374000  | 1.541631000  | -1.637998000 | 1                                               | -3.991568000 | -1.654625000 | 2.947634000  |
| 1                                               | 4.782512000  | 1.996043000  | -2.090542000 | 1                                               | -3.852236000 | -1.314591000 | 2.286496000  |
| 1                                               | 5.597466000  | -2.078385000 | 1.095825000  | 1                                               | -5.206045000 | 1.491938000  | 0.196258000  |
| 1                                               | 5.076559000  | -1.579875000 | 0.860821000  | 1                                               | -5.746328000 | 2.024208000  | 0.198079000  |
| 1                                               | 5.155443000  | -0.826138000 | -1.508165000 | 1                                               | -4.604157000 | -3.107720000 | -0.021483000 |
| 1                                               | 5.686217000  | -1.056767000 | -1.998973000 | 1                                               | -4.278597000 | -2.427293000 | 0.041764000  |
| <b>C<sub>6</sub>H<sub>34</sub><sup>2-</sup></b> |              |              |              | <b>C<sub>6</sub>H<sub>36</sub><sup>2-</sup></b> |              |              |              |
| SCF Energy = -248.392592 a. u.                  |              |              |              | SCF Energy = -249.566118 a. u.                  |              |              |              |
| 6                                               | -3.302446000 | -0.096692000 | -0.085072000 | 6                                               | -3.333077000 | 0.016228000  | -0.160897000 |
| 6                                               | -2.046556000 | -0.075300000 | -0.111961000 | 6                                               | -2.075524000 | 0.026210000  | -0.168998000 |
| 6                                               | -0.691107000 | -0.043143000 | -0.136737000 | 6                                               | -0.719857000 | 0.026715000  | -0.159237000 |
| 6                                               | 0.544603000  | -0.012480000 | -0.161525000 | 6                                               | 0.516439000  | 0.016860000  | -0.160474000 |
| 6                                               | 1.900303000  | 0.011911000  | -0.189301000 | 6                                               | 1.872282000  | 0.000850000  | -0.161936000 |

|                                                 |              |              |              |                                                 |              |              |              |
|-------------------------------------------------|--------------|--------------|--------------|-------------------------------------------------|--------------|--------------|--------------|
| 6                                               | 3.157017000  | 0.027864000  | -0.195206000 | 6                                               | 3.128861000  | -0.017125000 | -0.148650000 |
| 1                                               | 4.140631000  | -2.010220000 | -1.249613000 | 1                                               | 4.054091000  | -2.292116000 | -0.621375000 |
| 1                                               | 4.448595000  | -2.629208000 | -1.557062000 | 1                                               | 4.376418000  | -2.966652000 | -0.736940000 |
| 1                                               | 5.637987000  | -0.046470000 | -0.689928000 | 1                                               | 5.598696000  | -0.303367000 | -0.693424000 |
| 1                                               | 6.380040000  | -0.132173000 | -0.818817000 | 1                                               | 6.336554000  | -0.411888000 | -0.826238000 |
| 1                                               | 5.182530000  | -1.868396000 | 1.560044000  | 1                                               | 5.271548000  | -1.269972000 | 1.999032000  |
| 1                                               | 4.735648000  | -1.430320000 | 1.135310000  | 1                                               | 4.769189000  | -1.018615000 | 1.492062000  |
| 1                                               | 5.356258000  | 1.283563000  | 1.880826000  | 1                                               | 5.466051000  | 1.845334000  | 1.235042000  |
| 1                                               | 4.846427000  | 1.029830000  | 1.382139000  | 1                                               | 4.943762000  | 1.370856000  | 0.962131000  |
| 1                                               | 2.321840000  | -2.447523000 | 0.850265000  | 1                                               | 2.338866000  | -2.050412000 | 1.578381000  |
| 1                                               | 2.231622000  | -3.120942000 | 1.172808000  | 1                                               | 2.307899000  | -2.590454000 | 2.100944000  |
| 1                                               | 4.702840000  | 2.783349000  | -0.964991000 | 1                                               | 4.797699000  | 2.216849000  | -1.849148000 |
| 1                                               | 4.358054000  | 2.124428000  | -0.823334000 | 1                                               | 4.378840000  | 1.745352000  | -1.431661000 |
| 1                                               | 2.840752000  | -0.323550000 | 3.204499000  | 1                                               | 2.936060000  | 0.931552000  | 3.102044000  |
| 1                                               | 2.751233000  | -0.219512000 | 2.464027000  | 1                                               | 2.854502000  | 0.634084000  | 2.414593000  |
| 1                                               | 3.990296000  | 0.235791000  | -2.550211000 | 1                                               | 3.892345000  | -0.506076000 | -2.497584000 |
| 1                                               | 4.311563000  | 0.317849000  | -3.230139000 | 1                                               | 4.203834000  | -0.621172000 | -3.176719000 |
| 1                                               | 2.546371000  | 2.294196000  | 1.204715000  | 1                                               | 2.677384000  | 2.582210000  | 0.480029000  |
| 1                                               | 2.475653000  | 2.958666000  | 1.551504000  | 1                                               | 2.764443000  | 3.318658000  | 0.610253000  |
| 1                                               | -4.952467000 | 0.224530000  | 2.711581000  | 1                                               | -3.234796000 | 1.953854000  | 2.595680000  |
| 1                                               | -4.600622000 | 0.142528000  | 2.046649000  | 1                                               | -3.207271000 | 1.442921000  | 2.042244000  |
| 1                                               | -2.986021000 | 2.655106000  | 1.916438000  | 1                                               | -2.629999000 | 3.431882000  | -0.470591000 |
| 1                                               | -2.974211000 | 2.102015000  | 1.405426000  | 1                                               | -2.727043000 | 2.692062000  | -0.372721000 |
| 1                                               | -3.795131000 | -2.148656000 | 1.307958000  | 1                                               | -2.893479000 | -1.441162000 | 2.028199000  |
| 1                                               | -4.001599000 | -2.692632000 | 1.789793000  | 1                                               | -2.846727000 | -1.797883000 | 2.690354000  |
| 1                                               | -5.764862000 | 2.030799000  | 0.074006000  | 1                                               | -5.695907000 | 2.261152000  | 0.121584000  |
| 1                                               | -5.219588000 | 1.505010000  | 0.053066000  | 1                                               | -5.165334000 | 1.722163000  | 0.075945000  |
| 1                                               | -5.089561000 | 0.279625000  | -2.753657000 | 1                                               | -2.278604000 | -2.647999000 | -0.543410000 |
| 1                                               | -4.723836000 | 0.185942000  | -2.096681000 | 1                                               | -1.977439000 | -3.327925000 | -0.649875000 |
| 1                                               | -5.681459000 | -0.903880000 | 0.046980000  | 1                                               | -4.258105000 | -1.764876000 | -2.745099000 |
| 1                                               | -6.367945000 | -1.218768000 | 0.116697000  | 1                                               | -4.040174000 | -1.292779000 | -2.196298000 |
| 1                                               | -3.169888000 | 2.925073000  | -1.639341000 | 1                                               | -5.160305000 | -0.167344000 | 1.595455000  |
| 1                                               | -3.095578000 | 2.254056000  | -1.304206000 | 1                                               | -5.692314000 | -0.198757000 | 2.132700000  |
| 1                                               | -3.967720000 | -2.195039000 | -1.292940000 | 1                                               | -4.451784000 | 1.595519000  | -2.796357000 |
| 1                                               | -4.238731000 | -2.818031000 | -1.625003000 | 1                                               | -4.175513000 | 1.249002000  | -2.183354000 |
|                                                 |              |              |              | 1                                               | -4.759479000 | -2.038163000 | 0.104141000  |
|                                                 |              |              |              | 1                                               | -5.108645000 | -2.704271000 | 0.191131000  |
| <b>C<sub>6</sub>H<sub>38</sub><sup>2-</sup></b> |              |              |              | <b>C<sub>6</sub>H<sub>40</sub><sup>2-</sup></b> |              |              |              |
| SCF Energy = -250.742492 a. u.                  |              |              |              | SCF Energy = -251.91799 a. u.                   |              |              |              |
| 6                                               | 3.251989000  | 0.007913000  | -0.070792000 | 6                                               | 3.311741000  | 0.007162000  | -0.040398000 |
| 6                                               | 1.994260000  | 0.004284000  | -0.095043000 | 6                                               | 2.054503000  | -0.029695000 | -0.049517000 |
| 6                                               | 0.638636000  | -0.001226000 | -0.113420000 | 6                                               | 0.699738000  | -0.066998000 | -0.055336000 |
| 6                                               | -0.597233000 | -0.005833000 | -0.140097000 | 6                                               | -0.536016000 | -0.085309000 | -0.071053000 |
| 6                                               | -1.952408000 | -0.008732000 | -0.168500000 | 6                                               | -1.891209000 | -0.087258000 | -0.096894000 |
| 6                                               | -3.208914000 | -0.009600000 | -0.167228000 | 6                                               | -3.147902000 | -0.069991000 | -0.109219000 |
| 1                                               | -4.256308000 | 2.047809000  | -1.135463000 | 1                                               | -4.362907000 | 2.149446000  | -0.022740000 |
| 1                                               | -4.572443000 | 2.667225000  | -1.433005000 | 1                                               | -4.702511000 | 2.822409000  | 0.031711000  |
| 1                                               | -5.695816000 | 0.031940000  | -0.621774000 | 1                                               | -5.617219000 | 0.128374000  | -0.649390000 |
| 1                                               | -6.438959000 | 0.113677000  | -0.746642000 | 1                                               | -6.356842000 | 0.224470000  | -0.782647000 |
| 1                                               | -5.206831000 | 1.758628000  | 1.716139000  | 1                                               | -5.347372000 | 0.634440000  | 2.227434000  |
| 1                                               | -4.760488000 | 1.332366000  | 1.278389000  | 1                                               | -4.833843000 | 0.453075000  | 1.702709000  |
| 1                                               | -5.282266000 | -1.564752000 | 1.831412000  | 1                                               | -5.349189000 | -2.303834000 | 0.889989000  |
| 1                                               | -4.828113000 | -1.159546000 | 1.382022000  | 1                                               | -4.843196000 | -1.787012000 | 0.668986000  |
| 1                                               | -2.358000000 | 2.436717000  | 0.932007000  | 1                                               | -2.465305000 | 1.693014000  | 1.904274000  |



|                                                 |              |              |              |                                                 |              |              |              |
|-------------------------------------------------|--------------|--------------|--------------|-------------------------------------------------|--------------|--------------|--------------|
| 1                                               | -2.268835000 | 3.108979000  | 1.257018000  | 1                                               | -2.385820000 | 2.060660000  | 2.555812000  |
| 1                                               | -4.704472000 | -2.731318000 | -1.151810000 | 1                                               | -4.423337000 | -2.079863000 | -2.333821000 |
| 1                                               | -4.366533000 | -2.098712000 | -0.910807000 | 1                                               | -4.164916000 | -1.582480000 | -1.826182000 |
| 1                                               | -2.628680000 | -0.022037000 | 3.245929000  | 1                                               | -2.860384000 | -1.453159000 | 3.012290000  |
| 1                                               | -2.721537000 | 0.061137000  | 2.503683000  | 1                                               | -2.793645000 | -1.126440000 | 2.336967000  |
| 1                                               | -4.068606000 | -0.149543000 | -2.522105000 | 1                                               | -3.868400000 | 0.972977000  | -2.276465000 |
| 1                                               | -4.391223000 | -0.222467000 | -3.202046000 | 1                                               | -4.148725000 | 1.285780000  | -2.904899000 |
| 1                                               | -2.453850000 | -2.371866000 | 1.110983000  | 1                                               | -2.459049000 | -2.791914000 | 0.021161000  |
| 1                                               | -2.371783000 | -3.038981000 | 1.448612000  | 1                                               | -2.541917000 | -3.534523000 | -0.060737000 |
| 1                                               | 2.557634000  | -0.379575000 | 3.288435000  | 1                                               | -1.557175000 | 3.177800000  | -0.977991000 |
| 1                                               | 2.657655000  | -0.277156000 | 2.549064000  | 1                                               | -1.873889000 | 2.510307000  | -0.845539000 |
| 1                                               | 2.243938000  | -2.386493000 | -2.550996000 | 1                                               | 2.800634000  | -1.786371000 | 2.857536000  |
| 1                                               | 2.285994000  | -1.856690000 | -2.019795000 | 1                                               | 2.805220000  | -1.283042000 | 2.297934000  |
| 1                                               | 2.490122000  | -3.289942000 | 0.811920000  | 1                                               | 2.362112000  | -1.088737000 | -3.306555000 |
| 1                                               | 2.592312000  | -2.556326000 | 0.678852000  | 1                                               | 2.474955000  | -0.942340000 | -2.577891000 |
| 1                                               | 2.616363000  | 2.334576000  | 1.211257000  | 1                                               | 2.736098000  | -3.398179000 | -0.419930000 |
| 1                                               | 2.545655000  | 3.004969000  | 1.546338000  | 1                                               | 2.828155000  | -2.658385000 | -0.315531000 |
| 1                                               | 5.230928000  | -1.814660000 | 1.842350000  | 1                                               | 2.538309000  | 1.660409000  | 2.034649000  |
| 1                                               | 4.797988000  | -1.381240000 | 1.399205000  | 1                                               | 2.451819000  | 2.020868000  | 2.689489000  |
| 1                                               | 2.273406000  | 2.241118000  | -1.608371000 | 1                                               | 5.517912000  | -2.207344000 | 1.034826000  |
| 1                                               | 2.168324000  | 2.898449000  | -1.956830000 | 1                                               | 5.018827000  | -1.690221000 | 0.799515000  |
| 1                                               | 4.163380000  | 0.345722000  | -3.191870000 | 1                                               | 2.068565000  | 2.597158000  | -0.673087000 |
| 1                                               | 4.017137000  | 0.243320000  | -2.457357000 | 1                                               | 1.754733000  | 3.268319000  | -0.794993000 |
| 1                                               | 4.867679000  | 1.035444000  | 1.619557000  | 1                                               | 4.402088000  | 1.509113000  | -2.736503000 |
| 1                                               | 5.354945000  | 1.295894000  | 2.135929000  | 1                                               | 4.129063000  | 1.184178000  | -2.110861000 |
| 1                                               | 5.137395000  | -2.345668000 | -1.294845000 | 1                                               | 4.923550000  | 0.465153000  | 1.882855000  |
| 1                                               | 4.774018000  | -1.748247000 | -1.003830000 | 1                                               | 5.419124000  | 0.646632000  | 2.424407000  |
| 1                                               | 4.740683000  | 1.933311000  | -0.652287000 | 1                                               | 5.359486000  | -1.589671000 | -2.024878000 |
| 1                                               | 5.101206000  | 2.583095000  | -0.798783000 | 1                                               | 4.918727000  | -1.169852000 | -1.574869000 |
|                                                 |              |              |              | 1                                               | 4.581965000  | 2.163852000  | 0.152251000  |
|                                                 |              |              |              | 1                                               | 4.919170000  | 2.837470000  | 0.225215000  |
| <b>C<sub>6</sub>H<sub>42</sub><sup>2-</sup></b> |              |              |              | <b>C<sub>6</sub>H<sub>44</sub><sup>2-</sup></b> |              |              |              |
| SCF Energy = -253.094873 a. u.                  |              |              |              | SCF Energy = -254.269788 a. u.                  |              |              |              |
| 6                                               | -3.372501113 | -0.000784241 | 0.044946199  | 6                                               | -3.352301359 | -0.047622248 | -0.015671055 |
| 6                                               | -2.115528931 | -0.013208793 | 0.001332997  | 6                                               | -2.095247154 | -0.025512164 | -0.043260769 |
| 6                                               | -0.761248990 | -0.026975869 | -0.042444249 | 6                                               | -0.740787822 | -0.007922313 | -0.073174101 |
| 6                                               | 0.474229071  | -0.033839298 | -0.061415782 | 6                                               | 0.495019916  | -0.001390149 | -0.084432876 |
| 6                                               | 1.829294311  | -0.033559892 | -0.065176116 | 6                                               | 1.849882481  | -0.011079913 | -0.085626171 |
| 6                                               | 3.086213046  | -0.030529823 | -0.059428193 | 6                                               | 3.106738244  | -0.031254267 | -0.072651803 |
| 1                                               | 4.250718384  | 1.939909290  | 1.003871996  | 1                                               | 4.412240214  | 0.254244797  | 2.078109220  |
| 1                                               | 4.569858303  | 2.550412086  | 1.314530263  | 1                                               | 4.755124317  | 0.341026161  | 2.745919266  |
| 1                                               | 5.630661305  | 0.069594217  | 0.132843069  | 1                                               | 5.628769496  | -0.434362974 | 0.054741270  |
| 1                                               | 6.376035506  | 0.157141830  | 0.232316750  | 1                                               | 6.370794535  | -0.553333132 | 0.145393037  |
| 1                                               | 4.861990604  | 1.998536308  | -1.919735994 | 1                                               | 5.288892707  | 2.404787269  | 0.283453264  |
| 1                                               | 4.440951255  | 1.546198241  | -1.484377109 | 1                                               | 4.766499511  | 1.860240067  | 0.238539345  |
| 1                                               | 5.077207520  | -1.184151043 | -2.384764261 | 1                                               | 5.171244434  | 0.848140953  | -2.465514063 |
| 1                                               | 4.590810547  | -0.942304869 | -1.858384243 | 1                                               | 4.674927505  | 0.642936070  | -1.933199851 |
| 1                                               | 2.072362355  | 2.597300365  | -0.493921873 | 1                                               | 2.441025327  | 2.013494032  | 1.639335025  |
| 1                                               | 1.953187934  | 3.330961228  | -0.607345196 | 1                                               | 2.416948292  | 2.550114159  | 2.166090229  |
| 1                                               | 4.784834444  | -2.768845341 | 0.496804831  | 1                                               | 4.373115494  | -2.478096310 | -1.809717928 |
| 1                                               | 4.437355495  | -2.107067916 | 0.382370251  | 1                                               | 4.075887217  | -1.878761271 | -1.457556289 |
| 1                                               | 2.258669260  | 0.489647179  | -3.423140201 | 1                                               | 2.647252051  | 3.045857989  | -1.606726064 |
| 1                                               | 2.362124470  | 0.377652106  | -2.686212197 | 1                                               | 2.598354486  | 2.376061941  | -1.267094285 |
| 1                                               | 4.244847162  | -0.313883073 | 2.165187982  | 1                                               | 4.086832190  | -2.027643173 | 1.129327221  |

|                                                 |              |              |              |                                                 |              |              |              |
|-------------------------------------------------|--------------|--------------|--------------|-------------------------------------------------|--------------|--------------|--------------|
| 1                                               | 4.577795433  | -0.403938986 | 2.837617217  | 1                                               | 4.381904599  | -2.639729268 | 1.459245952  |
| 1                                               | 2.297140446  | -2.373498077 | -1.311933061 | 1                                               | 2.263858372  | -0.072541205 | -2.775682311 |
| 1                                               | 2.207750237  | -3.040885311 | -1.647835199 | 1                                               | 2.149309490  | 0.013977159  | -3.513469170 |
| 1                                               | 2.045321398  | -1.918132058 | 1.817117942  | 1                                               | 1.736461275  | -2.702355278 | 0.058677290  |
| 1                                               | 1.862924054  | -2.434153961 | 2.332157163  | 1                                               | 1.413444074  | -3.375703165 | 0.131025345  |
| 1                                               | 1.762428003  | 1.553052145  | 2.941923344  | 1                                               | -0.316958122 | 2.734628211  | 0.112132130  |
| 1                                               | 1.884263127  | 1.220299141  | 2.279368028  | 1                                               | -0.226495800 | 3.470865109  | 0.216965847  |
| 1                                               | -3.185688315 | -0.265525268 | -3.346490464 | 1                                               | 1.657570473  | -1.175874181 | 3.095015381  |
| 1                                               | -3.088567356 | -0.166835828 | -2.606052428 | 1                                               | 1.946885433  | -0.879270333 | 2.468711352  |
| 1                                               | -1.942323925 | -2.492181421 | 2.372067182  | 1                                               | -3.346916451 | 2.960627114  | -1.512117110 |
| 1                                               | -2.137683995 | -1.977858178 | 1.861450296  | 1                                               | -3.253734159 | 2.290044179  | -1.180292811 |
| 1                                               | -2.723970052 | -3.180043052 | -1.225871377 | 1                                               | -1.874492927 | -3.192833266 | -1.441885234 |
| 1                                               | -2.799738180 | -2.502568112 | -0.906918257 | 1                                               | -1.988415264 | -2.526527141 | -1.116305228 |
| 1                                               | -2.730999114 | 2.359427254  | -1.225542229 | 1                                               | -2.820127379 | -0.418027272 | -3.410861172 |
| 1                                               | -2.658592320 | 3.029323317  | -1.560424113 | 1                                               | -2.912359270 | -0.308498165 | -2.671772008 |
| 1                                               | -5.605270322 | -1.709515041 | -1.666152140 | 1                                               | -3.007560903 | 1.948014168  | 1.725064385  |
| 1                                               | -5.147603440 | -1.285450385 | -1.238565281 | 1                                               | -3.013223099 | 2.484015158  | 2.253830463  |
| 1                                               | -1.950052030 | 2.227670057  | 1.529033319  | 1                                               | -5.710994115 | 0.663598854  | -2.201961038 |
| 1                                               | -1.667238012 | 2.840051961  | 1.857868295  | 1                                               | -5.194569509 | 0.477634856  | -1.681492989 |
| 1                                               | -3.912465111 | 0.325819195  | 3.275024018  | 1                                               | -1.970668246 | -0.519628246 | 2.623292493  |
| 1                                               | -3.791889429 | 0.226712763  | 2.536188330  | 1                                               | -1.651173778 | -0.626951213 | 3.293518234  |
| 1                                               | -5.115199271 | 1.138008903  | -1.400840130 | 1                                               | -3.497470025 | -3.032649196 | 1.517378190  |
| 1                                               | -5.569236526 | 1.547174044  | -1.846652383 | 1                                               | -3.418622085 | -2.362837272 | 1.180763250  |
| 1                                               | -5.045976537 | -2.426950271 | 1.427738210  | 1                                               | -5.273841319 | 1.529826026  | 0.507882098  |
| 1                                               | -4.711789463 | -1.823568084 | 1.115715195  | 1                                               | -5.799193146 | 2.042328900  | 0.691623023  |
| 1                                               | -4.639137130 | 2.001310255  | 0.873939931  | 1                                               | -5.086400387 | -2.452233302 | -1.330173800 |
| 1                                               | -4.968561081 | 2.624546114  | 1.149135913  | 1                                               | -4.743958147 | -1.854403242 | -1.015700166 |
|                                                 |              |              |              | 1                                               | -4.693034362 | -0.308503986 | 2.076998477  |
|                                                 |              |              |              | 1                                               | -5.036959357 | -0.383017964 | 2.747390379  |
| <b>C<sub>6</sub>H<sub>46</sub><sup>2-</sup></b> |              |              |              | <b>C<sub>6</sub>H<sub>48</sub><sup>2-</sup></b> |              |              |              |
| SCF Energy = -255.447831 a. u.                  |              |              |              | SCF Energy = -256.622335 a. u.                  |              |              |              |
| 6                                               | -3.209554000 | -0.048574000 | -0.059130000 | 6                                               | -3.382816365 | 0.112343801  | 0.047938167  |
| 6                                               | -1.953037000 | -0.047097000 | -0.095668000 | 6                                               | -2.125500218 | 0.097641140  | 0.029765162  |
| 6                                               | -0.598771000 | -0.054899000 | -0.126127000 | 6                                               | -0.771265257 | 0.082573876  | 0.012589127  |
| 6                                               | 0.636706000  | -0.053614000 | -0.122507000 | 6                                               | 0.464720285  | 0.065912201  | -0.002732142 |
| 6                                               | 1.990793000  | -0.056520000 | -0.097311000 | 6                                               | 1.819343133  | 0.048806018  | 0.000122240  |
| 6                                               | 3.247269000  | -0.061868000 | -0.062896000 | 6                                               | 3.076670393  | 0.055671034  | 0.011196861  |
| 1                                               | 4.363859000  | -2.063032000 | 0.981159000  | 1                                               | 4.264229337  | 2.262363975  | -0.448944982 |
| 1                                               | 4.688972000  | -2.668238000 | 1.296124000  | 1                                               | 4.597666568  | 2.930153384  | -0.563184825 |
| 1                                               | 5.774956000  | -0.089906000 | 0.142468000  | 1                                               | 5.570864275  | 0.375125814  | 0.502310920  |
| 1                                               | 6.530253000  | -0.100488000 | 0.201079000  | 1                                               | 6.308479680  | 0.486861061  | 0.629473801  |
| 1                                               | 4.652669000  | 0.222060000  | 2.888284000  | 1                                               | 5.297186502  | 0.358257760  | -2.405501130 |
| 1                                               | 4.326853000  | 0.166325000  | 2.208885000  | 1                                               | 4.774397481  | 0.316077042  | -1.861243916 |
| 1                                               | 4.827978000  | 2.721155000  | 0.618199000  | 1                                               | 5.403017190  | -2.221781372 | -0.651473286 |
| 1                                               | 4.469210000  | 2.074416000  | 0.462036000  | 1                                               | 4.885376534  | -1.702536251 | -0.469862830 |
| 1                                               | 1.842069000  | -1.294640000 | 2.247102000  | 1                                               | 2.355376402  | 1.549919945  | -2.215461937 |
| 1                                               | 1.549436000  | -1.603333000 | 2.866278000  | 1                                               | 2.278296973  | 1.902604939  | -2.875199385 |
| 1                                               | 5.043510000  | 1.329611000  | -2.410667000 | 1                                               | 4.156969342  | -1.472950056 | 2.683594357  |
| 1                                               | 4.636722000  | 1.005765000  | -1.861539000 | 1                                               | 3.870859079  | -1.143474246 | 2.066415990  |
| 1                                               | 1.970221000  | 2.197953000  | 2.448643000  | 1                                               | 2.732954424  | -1.913214414 | -2.800667415 |
| 1                                               | 2.106078000  | 1.716545000  | 1.887885000  | 1                                               | 2.723399070  | -1.397105197 | -2.253278002 |
| 1                                               | 4.617317000  | -1.567838000 | -1.543492000 | 1                                               | 3.947132571  | 1.528027882  | 1.912611152  |
| 1                                               | 5.009157000  | -2.026965000 | -1.998839000 | 1                                               | 4.175811227  | 2.017669240  | 2.439204958  |
| 1                                               | 2.204828000  | 2.346250000  | -1.205711000 | 1                                               | 2.669217141  | -2.695765434 | 0.123668194  |

|                                                 |              |              |              |                                                 |              |              |              |
|-------------------------------------------------|--------------|--------------|--------------|-------------------------------------------------|--------------|--------------|--------------|
| 1                                               | 2.032682000  | 3.005722000  | -1.523372000 | 1                                               | 2.762997933  | -3.434602180 | 0.223229189  |
| 1                                               | 2.419557000  | -0.386870000 | -2.723815000 | 1                                               | 1.627471929  | 0.637832155  | 2.646351392  |
| 1                                               | 2.317371000  | -0.484404000 | -3.462552000 | 1                                               | 1.305654902  | 0.736952875  | 3.316379220  |
| 1                                               | -1.168642000 | 0.680108000  | 2.495398000  | 1                                               | -0.247798889 | -0.268584971 | -2.743356990 |
| 1                                               | -1.081086000 | 0.889887000  | 3.209574000  | 1                                               | -0.152724787 | -0.381828902 | -3.477737534 |
| 1                                               | 2.083900000  | -3.388138000 | -0.756233000 | 1                                               | 1.487959110  | 3.353680395  | 0.650772126  |
| 1                                               | 2.215277000  | -2.661795000 | -0.613707000 | 1                                               | 1.806181436  | 2.683677438  | 0.535561773  |
| 1                                               | -0.662451000 | 3.305995000  | 0.847645000  | 1                                               | -0.135243946 | -3.157292134 | -1.255840272 |
| 1                                               | -0.500802000 | 2.607157000  | 0.632473000  | 1                                               | -0.056563227 | -2.487711990 | -0.928943143 |
| 1                                               | -3.913469000 | 2.882293000  | 1.230977000  | 1                                               | 0.649894221  | -2.459453925 | 2.393910031  |
| 1                                               | -3.712305000 | 2.216583000  | 0.935990000  | 1                                               | 0.656651815  | -1.929207209 | 1.865069339  |
| 1                                               | -2.883379000 | -0.378994000 | -3.468454000 | 1                                               | -3.068630074 | -2.169254180 | -2.490552085 |
| 1                                               | -2.869468000 | -0.317040000 | -2.718296000 | 1                                               | -3.046133162 | -1.644749037 | -1.950907180 |
| 1                                               | -2.002421000 | 2.751845000  | -2.060507000 | 1                                               | -1.879086186 | -0.436656957 | 3.444030002  |
| 1                                               | -2.177176000 | 2.168965000  | -1.619909000 | 1                                               | -2.002144238 | -0.323737941 | 2.712523419  |
| 1                                               | -3.959226000 | -0.019504000 | 2.377086000  | 1                                               | -2.641141113 | -3.125716128 | 1.212120177  |
| 1                                               | -4.211812000 | -0.020000000 | 3.088328000  | 1                                               | -2.719866283 | -2.448187212 | 0.894941918  |
| 1                                               | -5.133626000 | 1.834128000  | -1.930577000 | 1                                               | -2.951610463 | 1.333149364  | -2.332210081 |
| 1                                               | -4.704932000 | 1.393770000  | -1.490088000 | 1                                               | -2.893505213 | 1.674887269  | -3.000223331 |
| 1                                               | -1.980928000 | -1.976870000 | 1.765131000  | 1                                               | -5.635201645 | -2.280012037 | -0.198845231 |
| 1                                               | -1.770316000 | -2.497596000 | 2.263779000  | 1                                               | -5.113951471 | -1.733600014 | -0.160399974 |
| 1                                               | -2.687900000 | -3.249794000 | -1.261260000 | 1                                               | -2.115293976 | 2.806471431  | -0.009225147 |
| 1                                               | -2.706352000 | -2.547004000 | -0.992375000 | 1                                               | -1.791507880 | 3.480067502  | -0.077405931 |
| 1                                               | -5.645078000 | 0.343567000  | 0.538266000  | 1                                               | -4.015441416 | 2.234678480  | 2.497848380  |
| 1                                               | -6.370304000 | 0.459210000  | 0.723709000  | 1                                               | -3.841552185 | 1.728090220  | 1.966350160  |
| 1                                               | -5.574029000 | -1.436868000 | -1.871690000 | 1                                               | -5.210801492 | 0.151889217  | -1.707361289 |
| 1                                               | -5.040142000 | -1.111795000 | -1.445657000 | 1                                               | -5.740495218 | 0.160832312  | -2.247355979 |
| 1                                               | -4.603657000 | -1.957519000 | 0.853001000  | 1                                               | -5.029506424 | -0.984636932 | 2.646669957  |
| 1                                               | -5.003816000 | -2.535239000 | 1.131072000  | 1                                               | -4.695823127 | -0.701436085 | 2.029733953  |
|                                                 |              |              |              | 1                                               | -4.733671471 | 2.181466003  | -0.370943197 |
|                                                 |              |              |              | 1                                               | -5.077263084 | 2.845071207  | -0.489919176 |
| <b>C<sub>6</sub>H<sub>50</sub><sup>2-</sup></b> |              |              |              | <b>C<sub>6</sub>H<sub>52</sub><sup>2-</sup></b> |              |              |              |
| SCF Energy = -257.796498 a. u.                  |              |              |              | SCF Energy = -258.977251 a. u.                  |              |              |              |
| 6                                               | -3.389842252 | 0.057432136  | -0.019999196 | 6                                               | 3.245024000  | -0.018767000 | -0.020694000 |
| 6                                               | -2.132256224 | 0.039179225  | -0.023100174 | 6                                               | 1.987967000  | 0.002605000  | -0.017564000 |
| 6                                               | -0.778292202 | 0.017796231  | -0.025212121 | 6                                               | 0.633698000  | 0.014049000  | -0.001372000 |
| 6                                               | 0.457852093  | 0.008131867  | -0.022610156 | 6                                               | -0.602836000 | 0.011750000  | 0.006563000  |
| 6                                               | 1.812636869  | -0.002586089 | -0.022456166 | 6                                               | -1.957329000 | -0.007926000 | 0.023231000  |
| 6                                               | 3.070158338  | -0.003347046 | -0.036217949 | 6                                               | -3.214218000 | -0.044003000 | 0.024015000  |
| 1                                               | 4.130113597  | 1.721161173  | -1.624621251 | 1                                               | -4.466785000 | -0.870196000 | -2.035973000 |
| 1                                               | 4.444774560  | 2.232173884  | -2.081739376 | 1                                               | -4.800397000 | -1.142482000 | -2.656114000 |
| 1                                               | 5.430967274  | 0.888322969  | 0.310929205  | 1                                               | -5.719247000 | -0.597632000 | 0.119949000  |
| 1                                               | 6.128254609  | 1.160682561  | 0.421893970  | 1                                               | -6.459640000 | -0.727453000 | 0.206534000  |
| 1                                               | 5.439336212  | -0.773505264 | -2.215864112 | 1                                               | -5.364215000 | 1.830023000  | -1.627427000 |
| 1                                               | 4.910359521  | -0.587582013 | -1.709167900 | 1                                               | -4.910308000 | 1.394372000  | -1.209027000 |
| 1                                               | 5.663494107  | -1.957764259 | 0.683213867  | 1                                               | -5.407308000 | 1.814431000  | 1.681931000  |
| 1                                               | 5.089703512  | -1.497162561 | 0.511029115  | 1                                               | -4.950397000 | 1.380389000  | 1.266204000  |
| 1                                               | 2.505645278  | -0.088309099 | -2.708863100 | 1                                               | -2.446991000 | 0.973875000  | -2.467074000 |
| 1                                               | 2.466227923  | -0.093453231 | -3.460081006 | 1                                               | -2.361857000 | 1.294775000  | -3.141697000 |
| 1                                               | 4.236651265  | 0.116619024  | 3.014175089  | 1                                               | -4.242246000 | -1.420079000 | 2.803934000  |
| 1                                               | 3.955737522  | 0.094810042  | 2.312910986  | 1                                               | -3.956716000 | -1.100671000 | 2.182083000  |
| 1                                               | 3.049679178  | -3.059816627 | -1.519318154 | 1                                               | -2.907986000 | 3.386752000  | -0.193671000 |
| 1                                               | 2.993625020  | -2.388316098 | -1.182670934 | 1                                               | -2.809324000 | 2.647146000  | -0.095721000 |
| 1                                               | 3.377013408  | 2.445264037  | 0.720616115  | 1                                               | -4.084579000 | -2.441400000 | -0.113488000 |

|                                                 |              |              |              |                                                 |              |              |              |
|-------------------------------------------------|--------------|--------------|--------------|-------------------------------------------------|--------------|--------------|--------------|
| 1                                               | 3.508403356  | 3.157540848  | 0.930460824  | 1                                               | -4.404402000 | -3.121605000 | -0.179953000 |
| 1                                               | 2.907912064  | -2.266078271 | 1.462468113  | 1                                               | -2.742605000 | 1.330133000  | 2.397269000  |
| 1                                               | 2.972992928  | -2.893319472 | 1.872134913  | 1                                               | -2.681716000 | 1.670085000  | 3.064363000  |
| 1                                               | 1.562723918  | 1.434866757  | 2.316970305  | 1                                               | -1.555654000 | -2.578438000 | 0.837284000  |
| 1                                               | 1.369371018  | 1.796801240  | 2.943914109  | 1                                               | -1.229811000 | -3.242895000 | 0.958243000  |
| 1                                               | -0.190066180 | -1.667534351 | -2.182187272 | 1                                               | 0.178404000  | 2.445311000  | -1.304991000 |
| 1                                               | -0.155882917 | -2.149889997 | -2.754688262 | 1                                               | 0.102529000  | 3.111697000  | -1.638771000 |
| 1                                               | 1.248705375  | 2.797156324  | -1.938140250 | 1                                               | -1.783833000 | -2.388898000 | -2.454219000 |
| 1                                               | 1.528957117  | 2.230204816  | -1.535409376 | 1                                               | -1.974734000 | -1.874325000 | -1.942566000 |
| 1                                               | 0.185690943  | -3.456614366 | 0.414738965  | 1                                               | -0.004074000 | 2.927173000  | 1.902142000  |
| 1                                               | 0.208985854  | -2.712646188 | 0.330654817  | 1                                               | -0.075720000 | 2.261427000  | 1.566052000  |
| 1                                               | 0.667431155  | -1.278360998 | 3.246186504  | 1                                               | -0.713272000 | -0.697371000 | 3.403186000  |
| 1                                               | 0.665679050  | -0.983987102 | 2.557369179  | 1                                               | -0.592375000 | -0.575458000 | 2.673861000  |
| 1                                               | -0.427185743 | 3.416247138  | 0.828668288  | 1                                               | 1.160491000  | -3.096475000 | -1.463309000 |
| 1                                               | -0.375411041 | 2.691119258  | 0.646803297  | 1                                               | 1.247059000  | -2.429250000 | -1.133543000 |
| 1                                               | -2.978221199 | -3.186092077 | -1.098948214 | 1                                               | 2.822116000  | 3.369320000  | 0.491060000  |
| 1                                               | -2.972830471 | -2.471317021 | -0.862634059 | 1                                               | 2.907630000  | 2.628971000  | 0.387337000  |
| 1                                               | -1.725078143 | 1.217504026  | 3.153656158  | 1                                               | 1.684157000  | -2.603156000 | 2.178372000  |
| 1                                               | -1.944082911 | 0.976346312  | 2.477654977  | 1                                               | 1.902328000  | -2.088397000 | 1.677781000  |
| 1                                               | -2.561037436 | -2.238237197 | 2.529330193  | 1                                               | 2.377699000  | 0.763028000  | 3.311081000  |
| 1                                               | -2.628634538 | -1.744783117 | 1.965822041  | 1                                               | 2.481579000  | 0.636632000  | 2.577132000  |
| 1                                               | -2.955741221 | -0.199984020 | -2.676065224 | 1                                               | 2.853267000  | 1.628485000  | -2.195284000 |
| 1                                               | -2.963495255 | -0.246899817 | -3.427281013 | 1                                               | 2.854396000  | 2.141520000  | -2.744264000 |
| 1                                               | -5.493465753 | -2.245893863 | 1.042710960  | 1                                               | 5.400471000  | 1.603798000  | 1.844700000  |
| 1                                               | -5.039625352 | -1.696135852 | 0.790732100  | 1                                               | 4.947951000  | 1.187668000  | 1.404962000  |
| 1                                               | -2.208566229 | 2.234567353  | -1.587359235 | 1                                               | 3.856055000  | -0.870825000 | -2.308598000 |
| 1                                               | -1.974484143 | 2.813902138  | -2.003751350 | 1                                               | 4.009734000  | -1.188481000 | -2.976613000 |
| 1                                               | -3.882584059 | 3.162460079  | 1.029586306  | 1                                               | 4.086195000  | -3.218157000 | -0.285422000 |
| 1                                               | -3.769337482 | 2.454842145  | 0.793552086  | 1                                               | 3.945150000  | -2.483590000 | -0.189803000 |
| 1                                               | -5.190422347 | -0.937043789 | -1.510807925 | 1                                               | 5.057134000  | 1.442328000  | -1.048939000 |
| 1                                               | -5.694433513 | -1.254550138 | -1.976828399 | 1                                               | 5.571964000  | 1.934862000  | -1.301653000 |
| 1                                               | -4.990440443 | 0.452747121  | 2.796312287  | 1                                               | 4.754912000  | -1.487466000 | 2.508632000  |
| 1                                               | -4.639547243 | 0.367727916  | 2.131619094  | 1                                               | 4.437207000  | -1.170566000 | 1.901327000  |
| 1                                               | -4.864159172 | 1.527126164  | -1.416330207 | 1                                               | 5.699336000  | -0.731912000 | -0.228280000 |
| 1                                               | -5.265243247 | 1.985449225  | -1.865787961 | 1                                               | 6.388929000  | -1.031045000 | -0.314883000 |
| 1                                               |              |              |              | 1                                               | 0.734523000  | -0.243531000 | -3.456095000 |
| 1                                               |              |              |              | 1                                               | 0.631134000  | -0.128693000 | -2.723122000 |
| <b>C<sub>6</sub>H<sub>54</sub><sup>2-</sup></b> |              |              |              | <b>C<sub>6</sub>H<sub>56</sub><sup>2-</sup></b> |              |              |              |
| SCF Energy = -260.151492 a. u.                  |              |              |              | SCF Energy = -261.327018 a. u.                  |              |              |              |
| 6                                               | -3.216601000 | -0.027374000 | -0.006873000 | 6                                               | -3.233494000 | -0.028710000 | -0.005451000 |
| 6                                               | -1.959436000 | 0.000720000  | -0.001717000 | 6                                               | -1.975915000 | -0.008754000 | 0.000971000  |
| 6                                               | -0.604621000 | 0.015356000  | 0.004394000  | 6                                               | -0.620989000 | 0.016141000  | 0.002264000  |
| 6                                               | 0.631811000  | 0.015239000  | 0.008406000  | 6                                               | 0.615935000  | 0.026764000  | -0.002541000 |
| 6                                               | 1.986425000  | -0.003372000 | 0.002780000  | 6                                               | 1.971080000  | 0.012553000  | -0.002773000 |
| 6                                               | 3.243126000  | -0.036008000 | -0.006135000 | 6                                               | 3.228034000  | -0.021184000 | -0.005233000 |
| 1                                               | 4.592911000  | 1.095589000  | -1.830674000 | 1                                               | 4.214856000  | -1.715019000 | 1.711700000  |
| 1                                               | 4.927292000  | 1.413962000  | -2.428401000 | 1                                               | 4.450498000  | -2.218173000 | 2.220750000  |
| 1                                               | 5.369429000  | 1.270851000  | 0.522099000  | 1                                               | 5.603134000  | -1.082866000 | -0.152569000 |
| 1                                               | 6.026380000  | 1.621964000  | 0.652555000  | 1                                               | 6.277934000  | -1.415155000 | -0.221742000 |
| 1                                               | 6.218795000  | -1.126580000 | -1.031742000 | 1                                               | 5.701054000  | 0.744055000  | 2.095027000  |
| 1                                               | 5.581000000  | -0.836957000 | -0.747744000 | 1                                               | 5.173780000  | 0.552059000  | 1.589873000  |
| 1                                               | 5.493541000  | -1.103330000 | 2.157872000  | 1                                               | 5.944071000  | 1.607509000  | -0.989609000 |
| 1                                               | 4.985911000  | -0.880762000 | 1.644305000  | 1                                               | 5.326339000  | 1.258434000  | -0.729135000 |
| 1                                               | 3.344257000  | -1.300333000 | -2.260374000 | 1                                               | 2.742692000  | 0.331316000  | 2.670160000  |

|                                                 |              |              |              |                                                 |              |              |              |
|-------------------------------------------------|--------------|--------------|--------------|-------------------------------------------------|--------------|--------------|--------------|
| 1                                               | 3.446069000  | -1.640571000 | -2.925333000 | 1                                               | 2.833332000  | 0.439650000  | 3.408805000  |
| 1                                               | 3.553338000  | 1.304705000  | 3.041834000  | 1                                               | 4.798699000  | -0.673073000 | -2.868429000 |
| 1                                               | 3.441583000  | 0.984194000  | 2.368781000  | 1                                               | 4.461543000  | -0.548906000 | -2.205201000 |
| 1                                               | 4.293965000  | -3.197811000 | 0.140560000  | 1                                               | 3.711257000  | 3.068072000  | 1.182800000  |
| 1                                               | 3.979643000  | -2.516537000 | 0.068193000  | 1                                               | 3.585120000  | 2.395859000  | 0.866209000  |
| 1                                               | 3.171540000  | 2.629605000  | -0.112783000 | 1                                               | 3.423314000  | -2.494864000 | -0.709151000 |
| 1                                               | 3.284866000  | 3.369766000  | -0.035802000 | 1                                               | 3.541043000  | -3.227635000 | -0.841305000 |
| 1                                               | 2.367235000  | -1.684659000 | 2.113564000  | 1                                               | 3.158837000  | 1.680654000  | -2.067843000 |
| 1                                               | 2.184384000  | -2.189194000 | 2.639465000  | 1                                               | 3.188017000  | 2.201966000  | -2.609557000 |
| 1                                               | 0.934058000  | 2.293006000  | 1.685019000  | 1                                               | 1.848213000  | -0.843450000 | -2.579621000 |
| 1                                               | 1.118060000  | 2.813852000  | 2.189083000  | 1                                               | 1.715838000  | -0.974019000 | -3.306370000 |
| 1                                               | 1.287359000  | -2.652494000 | -0.411121000 | 1                                               | 0.524274000  | 2.063646000  | 1.844075000  |
| 1                                               | 1.161671000  | -3.382339000 | -0.525279000 | 1                                               | 0.543083000  | 2.597499000  | 2.368736000  |
| 1                                               | 1.782305000  | 1.577288000  | -3.018093000 | 1                                               | 1.358614000  | -2.786458000 | 1.900362000  |
| 1                                               | 2.068128000  | 1.257508000  | -2.402238000 | 1                                               | 1.650719000  | -2.176902000 | 1.576142000  |
| 1                                               | -1.031491000 | -2.818206000 | 1.964673000  | 1                                               | 1.375212000  | 3.550606000  | -0.678766000 |
| 1                                               | -1.151089000 | -2.163158000 | 1.621602000  | 1                                               | 1.062146000  | 2.879597000  | -0.576736000 |
| 1                                               | -0.134157000 | 0.155769000  | 3.496783000  | 1                                               | -0.158445000 | 1.726317000  | -3.069112000 |
| 1                                               | -0.024999000 | 0.051026000  | 2.763008000  | 1                                               | -0.070712000 | 1.387955000  | -2.406651000 |
| 1                                               | -0.120183000 | 3.451546000  | -0.683081000 | 1                                               | 0.302845000  | -3.243903000 | -1.258150000 |
| 1                                               | -0.011287000 | 2.715816000  | -0.769002000 | 1                                               | 0.217691000  | -2.572621000 | -0.937407000 |
| 1                                               | -4.187570000 | -2.882957000 | 1.466286000  | 1                                               | -4.692835000 | 2.962509000  | 0.154946000  |
| 1                                               | -3.915094000 | -2.258303000 | 1.145002000  | 1                                               | -4.354800000 | 2.290836000  | 0.096261000  |
| 1                                               | -1.935587000 | 2.707184000  | 2.100661000  | 1                                               | -1.528517000 | -1.219762000 | -3.172577000 |
| 1                                               | -2.128345000 | 2.182628000  | 1.599890000  | 1                                               | -1.822493000 | -0.917217000 | -2.552335000 |
| 1                                               | -3.501511000 | -0.208888000 | 3.345845000  | 1                                               | -3.707074000 | 1.681238000  | -2.830028000 |
| 1                                               | -3.382674000 | -0.115908000 | 2.607743000  | 1                                               | -3.602794000 | 1.337689000  | -2.167141000 |
| 1                                               | -3.448929000 | -0.392247000 | -2.568040000 | 1                                               | -3.469800000 | -0.914496000 | 2.544859000  |
| 1                                               | -3.568223000 | -0.506290000 | -3.303496000 | 1                                               | -3.569208000 | -1.228900000 | 3.220635000  |
| 1                                               | -6.222414000 | -0.532578000 | 1.331674000  | 1                                               | -6.452448000 | 0.540507000  | -0.827645000 |
| 1                                               | -5.548686000 | -0.431007000 | 1.004060000  | 1                                               | -5.720464000 | 0.418993000  | -0.686391000 |
| 1                                               | -1.436065000 | 1.202089000  | -2.470441000 | 1                                               | -1.862022000 | -2.422908000 | 1.285753000  |
| 1                                               | -1.148337000 | 1.515850000  | -3.086305000 | 1                                               | -1.556708000 | -3.039902000 | 1.583301000  |
| 1                                               | -3.366274000 | 3.068790000  | -1.395392000 | 1                                               | -3.022921000 | -3.327628000 | -1.246488000 |
| 1                                               | -3.268805000 | 2.396513000  | -1.070475000 | 1                                               | -2.951769000 | -2.651683000 | -0.926851000 |
| 1                                               | -4.949518000 | -1.641353000 | -1.034553000 | 1                                               | -5.159050000 | 0.569508000  | 1.631403000  |
| 1                                               | -5.453732000 | -2.146217000 | -1.281213000 | 1                                               | -5.680053000 | 0.765003000  | 2.141178000  |
| 1                                               | -5.004961000 | 2.397048000  | 1.344171000  | 1                                               | -4.786022000 | -1.347071000 | -2.671268000 |
| 1                                               | -4.659143000 | 1.798202000  | 1.041167000  | 1                                               | -4.460018000 | -1.054528000 | -2.057612000 |
| 1                                               | -5.350168000 | 0.778768000  | -1.142766000 | 1                                               | -4.955406000 | -1.757809000 | 0.536920000  |
| 1                                               | -5.971633000 | 1.054576000  | -1.474001000 | 1                                               | -5.470314000 | -2.280261000 | 0.723558000  |
| 1                                               | 0.165490000  | -1.368197000 | -3.206063000 | 1                                               | -0.279298000 | -0.475558000 | 3.475122000  |
| 1                                               | 0.060583000  | -1.233228000 | -2.476912000 | 1                                               | -0.368601000 | -0.368251000 | 2.739470000  |
| 1                                               | -2.143649000 | -3.177716000 | -1.344779000 | 1                                               | -2.716250000 | 2.198924000  | 2.649303000  |
| 1                                               | -2.259494000 | -2.507640000 | -1.024923000 | 1                                               | -2.725782000 | 1.677441000  | 2.108008000  |
| 1                                               |              |              |              | 1                                               | -1.789678000 | 3.403291000  | -0.508256000 |
| 1                                               |              |              |              | 1                                               | -1.708576000 | 2.667019000  | -0.394832000 |
| <b>C<sub>6</sub>H<sub>58</sub><sup>2-</sup></b> |              |              |              | <b>C<sub>6</sub>H<sub>60</sub><sup>2-</sup></b> |              |              |              |
| SCF Energy = -262.500505 a. u.                  |              |              |              | SCF Energy = -263.674357 a. u.                  |              |              |              |
| 6                                               | 3.249867000  | -0.025112000 | -0.005857000 | 6                                               | 3.257891000  | -0.033270000 | -0.008961000 |
| 6                                               | 1.991810000  | -0.004168000 | -0.013644000 | 6                                               | 1.999483000  | -0.022004000 | 0.000225000  |
| 6                                               | 0.636196000  | 0.017978000  | -0.009580000 | 6                                               | 0.643325000  | -0.010393000 | 0.013355000  |
| 6                                               | -0.600743000 | 0.032880000  | -0.001981000 | 6                                               | -0.593500000 | 0.004433000  | 0.018398000  |
| 6                                               | -1.956118000 | 0.026579000  | 0.006312000  | 6                                               | -1.949739000 | 0.009203000  | 0.010114000  |

|   |              |              |              |   |              |              |              |
|---|--------------|--------------|--------------|---|--------------|--------------|--------------|
| 6 | -3.213616000 | -0.000959000 | 0.014092000  | 6 | -3.207978000 | 0.010253000  | -0.018308000 |
| 1 | -4.525049000 | -0.187445000 | -2.216097000 | 1 | -4.337959000 | -1.413149000 | -1.943781000 |
| 1 | -4.866207000 | -0.264140000 | -2.884172000 | 1 | -4.585014000 | -1.898884000 | -2.463579000 |
| 1 | -5.600028000 | -1.153215000 | -0.332191000 | 1 | -5.413802000 | -1.533306000 | 0.233993000  |
| 1 | -6.269430000 | -1.486229000 | -0.430657000 | 1 | -6.073378000 | -1.886749000 | 0.321434000  |
| 1 | -6.092510000 | 1.608385000  | -0.514021000 | 1 | -6.343877000 | 0.484474000  | -1.454233000 |
| 1 | -5.429878000 | 1.263113000  | -0.401720000 | 1 | -5.674038000 | 0.386156000  | -1.123731000 |
| 1 | -5.866858000 | 0.112031000  | 2.129174000  | 1 | -5.721113000 | 0.884090000  | 1.873345000  |
| 1 | -5.216736000 | 0.056042000  | 1.751380000  | 1 | -5.184944000 | 0.672315000  | 1.382627000  |
| 1 | -3.444483000 | 1.984286000  | -1.750155000 | 1 | -3.450781000 | 0.908175000  | -2.434345000 |
| 1 | -3.622230000 | 2.504215000  | -2.264290000 | 1 | -3.555645000 | 1.221569000  | -3.111840000 |
| 1 | -4.447944000 | -2.695186000 | 1.687375000  | 1 | -4.169599000 | -1.937231000 | 2.651263000  |
| 1 | -4.152658000 | -2.086519000 | 1.356825000  | 1 | -3.952007000 | -1.445977000 | 2.124930000  |
| 1 | -4.093392000 | 2.662550000  | 1.793176000  | 1 | -3.443308000 | 2.923048000  | 1.957774000  |
| 1 | -3.818699000 | 2.051318000  | 1.447356000  | 1 | -3.262665000 | 2.391236000  | 1.459446000  |
| 1 | -3.497617000 | -2.288959000 | -1.134576000 | 1 | -3.206473000 | -2.659159000 | -0.056451000 |
| 1 | -3.605406000 | -2.956776000 | -1.467105000 | 1 | -3.317718000 | -3.398613000 | -0.141222000 |
| 1 | -2.760527000 | -0.341024000 | 2.682396000  | 1 | -2.340315000 | 0.449688000  | 2.749859000  |
| 1 | -2.855993000 | -0.454951000 | 3.419879000  | 1 | -2.428116000 | 0.366266000  | 3.490400000  |
| 1 | -1.585025000 | -2.423835000 | 1.096086000  | 1 | -1.391708000 | -1.903997000 | 1.949196000  |
| 1 | -1.471769000 | -3.091013000 | 1.418283000  | 1 | -1.096242000 | -2.505283000 | 2.283826000  |
| 1 | -1.755900000 | 2.846364000  | 0.057352000  | 1 | -4.503386000 | 2.325461000  | -0.604423000 |
| 1 | -1.843543000 | 3.582749000  | -0.045241000 | 1 | -4.840764000 | 2.985657000  | -0.732490000 |
| 1 | -1.676606000 | -0.401658000 | -3.367818000 | 1 | -1.547836000 | -1.632636000 | -2.957607000 |
| 1 | -1.993552000 | -0.312191000 | -2.693742000 | 1 | -1.841041000 | -1.318855000 | -2.342674000 |
| 1 | -1.127547000 | 2.077749000  | 2.690671000  | 1 | -0.489534000 | 2.779718000  | 2.126228000  |
| 1 | -0.710318000 | 1.644516000  | 2.245578000  | 1 | -0.309475000 | 2.260844000  | 1.617750000  |
| 1 | 0.373510000  | -1.231935000 | 3.264686000  | 1 | 0.923112000  | -0.161309000 | 3.492839000  |
| 1 | 0.433609000  | -0.908005000 | 2.592294000  | 1 | 0.814336000  | -0.066654000 | 2.758096000  |
| 1 | -0.434349000 | -2.979755000 | -1.780568000 | 1 | -0.274902000 | -3.398655000 | -0.734142000 |
| 1 | -0.349644000 | -2.317390000 | -1.441950000 | 1 | -0.181188000 | -2.723593000 | -0.424581000 |
| 1 | 5.429191000  | 1.042382000  | 2.314722000  | 1 | 5.619382000  | 1.795073000  | 1.569456000  |
| 1 | 4.928722000  | 0.817763000  | 1.796898000  | 1 | 5.156478000  | 1.367627000  | 1.155241000  |
| 1 | 1.427719000  | -3.281090000 | 0.803992000  | 1 | 1.751136000  | -2.812422000 | 1.938334000  |
| 1 | 1.758429000  | -2.615221000 | 0.707552000  | 1 | 2.030707000  | -2.198718000 | 1.609216000  |
| 1 | 3.745413000  | -1.666473000 | 2.836702000  | 1 | 4.145549000  | -0.579925000 | 3.118801000  |
| 1 | 3.625693000  | -1.322844000 | 2.176232000  | 1 | 4.002996000  | -0.461665000 | 2.387198000  |
| 1 | 3.133007000  | 1.902635000  | -1.845628000 | 1 | 2.972034000  | 1.195373000  | -2.440094000 |
| 1 | 3.158732000  | 2.434144000  | -2.377919000 | 1 | 2.979337000  | 1.702831000  | -2.994500000 |
| 1 | 6.470691000  | -1.149596000 | 0.412900000  | 1 | 6.632898000  | -0.799465000 | 0.171610000  |
| 1 | 5.789277000  | -0.841920000 | 0.315390000  | 1 | 5.892934000  | -0.670551000 | 0.231496000  |
| 1 | 1.645089000  | -0.080051000 | -2.762206000 | 1 | 1.678657000  | -1.096775000 | -2.501113000 |
| 1 | 1.316552000  | -0.147627000 | -3.432277000 | 1 | 1.352213000  | -1.228465000 | -3.162877000 |
| 1 | 2.530225000  | -2.743132000 | -2.295228000 | 1 | 2.632314000  | -3.365398000 | -1.362997000 |
| 1 | 2.544422000  | -2.208729000 | -1.769189000 | 1 | 2.636185000  | -2.811275000 | -0.858703000 |
| 1 | 5.410413000  | 1.280448000  | -0.674377000 | 1 | 5.286457000  | 1.037274000  | -1.337059000 |
| 1 | 6.063243000  | 1.629362000  | -0.822623000 | 1 | 5.889173000  | 1.337187000  | -1.676673000 |
| 1 | 4.489841000  | -3.243131000 | -0.048570000 | 1 | 4.700780000  | -3.001440000 | 0.899359000  |
| 1 | 4.163821000  | -2.567606000 | 0.009109000  | 1 | 4.370475000  | -2.342292000 | 0.746689000  |
| 1 | 4.632572000  | -0.613305000 | -2.033832000 | 1 | 4.490122000  | -1.209139000 | -1.875177000 |
| 1 | 5.117930000  | -0.808777000 | -2.579215000 | 1 | 4.813598000  | -1.529664000 | -2.478176000 |
| 1 | -0.327703000 | 2.410823000  | -2.576544000 | 1 | -0.255645000 | 1.531834000  | -3.104180000 |
| 1 | -0.144739000 | 1.896780000  | -2.063829000 | 1 | -0.242631000 | 1.018186000  | -2.559788000 |
| 1 | 3.959183000  | 3.301814000  | 0.702827000  | 1 | 4.065066000  | 3.329724000  | -0.471058000 |
| 1 | 3.821070000  | 2.573445000  | 0.577545000  | 1 | 3.755324000  | 2.651650000  | -0.375499000 |
| 1 | 2.280904000  | 1.566073000  | 3.041116000  | 1 | 2.665415000  | 2.373669000  | 2.468904000  |

|                                                 |              |              |              |                                                 |              |              |              |
|-------------------------------------------------|--------------|--------------|--------------|-------------------------------------------------|--------------|--------------|--------------|
| 1                                               | 2.381632000  | 1.233624000  | 2.374898000  | 1                                               | 2.741302000  | 2.001303000  | 1.820824000  |
| 1                                               | 1.105056000  | 2.684362000  | 0.231977000  | 1                                               | 1.213254000  | 2.588656000  | -0.603484000 |
| 1                                               | 1.206016000  | 3.419579000  | 0.135316000  | 1                                               | 1.100722000  | 3.318696000  | -0.725670000 |
| <b>C<sub>6</sub>H<sub>62</sub><sup>2-</sup></b> |              |              |              | <b>C<sub>6</sub>H<sub>64</sub><sup>2-</sup></b> |              |              |              |
| SCF Energy = -264.848168 a. u.                  |              |              |              | SCF Energy = -266.020744 a. u.                  |              |              |              |
| 6                                               | -3.232831000 | 0.007371000  | -0.037882000 | 6                                               | 3.234248000  | -0.015075000 | -0.025621000 |
| 6                                               | -1.974929000 | 0.006831000  | 0.010639000  | 6                                               | 1.975750000  | 0.007770000  | 0.013795000  |
| 6                                               | -0.618548000 | 0.004906000  | 0.033871000  | 6                                               | 0.618001000  | 0.022597000  | 0.027197000  |
| 6                                               | 0.618630000  | 0.002720000  | 0.034364000  | 6                                               | -0.619259000 | 0.026018000  | 0.015850000  |
| 6                                               | 1.975098000  | -0.005632000 | 0.013514000  | 6                                               | -1.976524000 | 0.012333000  | -0.008202000 |
| 6                                               | 3.233212000  | -0.015315000 | -0.031108000 | 6                                               | -3.235226000 | -0.013733000 | -0.038895000 |
| 1                                               | 5.011315000  | -0.372570000 | -2.065754000 | 1                                               | -4.731782000 | -1.140379000 | -2.005348000 |
| 1                                               | 5.485499000  | -0.454852000 | -2.644494000 | 1                                               | -5.136265000 | -1.462751000 | -2.552366000 |
| 1                                               | 5.643148000  | 1.222815000  | -0.471993000 | 1                                               | -5.373011000 | -1.792885000 | 0.208492000  |
| 1                                               | 6.293059000  | 1.583318000  | -0.592639000 | 1                                               | -5.943221000 | -2.278851000 | 0.280551000  |
| 1                                               | 6.339737000  | -1.309209000 | 0.348172000  | 1                                               | -6.645843000 | 0.429331000  | -0.702873000 |
| 1                                               | 5.649842000  | -1.014539000 | 0.264004000  | 1                                               | -5.914376000 | 0.330509000  | -0.551446000 |
| 1                                               | 5.302550000  | 0.947344000  | 2.355454000  | 1                                               | -5.344961000 | 0.076851000  | 2.494620000  |
| 1                                               | 4.843788000  | 0.717305000  | 1.800957000  | 1                                               | -4.879392000 | 0.045536000  | 1.900574000  |
| 1                                               | 4.161387000  | -2.342993000 | -1.090430000 | 1                                               | -4.193705000 | 1.226492000  | -2.085812000 |
| 1                                               | 4.418212000  | -2.982570000 | -1.391291000 | 1                                               | -4.468736000 | 1.580862000  | -2.692294000 |
| 1                                               | 4.136201000  | 3.296872000  | 0.472852000  | 1                                               | -3.825067000 | -2.675515000 | 2.269721000  |
| 1                                               | 3.919335000  | 2.585977000  | 0.359259000  | 1                                               | -3.651104000 | -2.135086000 | 1.778431000  |
| 1                                               | 2.844411000  | -0.545733000 | 3.545265000  | 1                                               | -2.821482000 | 2.491892000  | 2.392305000  |
| 1                                               | 2.827904000  | -0.443673000 | 2.802143000  | 1                                               | -2.815149000 | 1.960016000  | 1.861360000  |
| 1                                               | 3.556927000  | 1.656568000  | -2.003791000 | 1                                               | -3.159547000 | -2.599638000 | -0.721782000 |
| 1                                               | 3.704578000  | 2.144548000  | -2.558654000 | 1                                               | -3.234700000 | -3.327478000 | -0.901165000 |
| 1                                               | 2.202592000  | 1.871884000  | 1.985439000  | 1                                               | -2.158162000 | -0.382692000 | 2.680677000  |
| 1                                               | 2.041448000  | 2.375763000  | 2.517450000  | 1                                               | -1.982205000 | -0.489560000 | 3.402926000  |
| 1                                               | 1.526451000  | 2.651645000  | -0.498438000 | 1                                               | -1.216977000 | -2.454143000 | 1.088682000  |
| 1                                               | 1.295225000  | 3.354300000  | -0.617069000 | 1                                               | -1.030066000 | -3.106310000 | 1.405894000  |
| 1                                               | 3.761688000  | -2.205648000 | 1.325407000  | 1                                               | -4.981915000 | 2.114966000  | 0.610578000  |
| 1                                               | 3.951863000  | -2.836744000 | 1.689723000  | 1                                               | -5.446703000 | 2.679004000  | 0.784944000  |
| 1                                               | 2.509285000  | -1.195319000 | -3.251166000 | 1                                               | -2.213778000 | -0.942457000 | -3.344556000 |
| 1                                               | 2.575475000  | -0.933452000 | -2.549801000 | 1                                               | -2.342675000 | -0.751663000 | -2.629606000 |
| 1                                               | -0.011386000 | 0.348923000  | 3.587717000  | 1                                               | 0.117604000  | 1.746675000  | 3.184094000  |
| 1                                               | -0.000493000 | 0.276470000  | 2.842974000  | 1                                               | 0.079559000  | 1.391764000  | 2.524213000  |
| 1                                               | -0.914417000 | 3.047912000  | 1.788959000  | 1                                               | 0.991846000  | -1.458179000 | 3.187714000  |
| 1                                               | -0.763428000 | 2.424068000  | 1.403870000  | 1                                               | 0.798938000  | -1.192976000 | 2.515158000  |
| 1                                               | 0.619011000  | 1.349474000  | -3.207731000 | 1                                               | -0.323210000 | -2.961623000 | -1.840715000 |
| 1                                               | 0.493588000  | 1.079632000  | -2.520850000 | 1                                               | -0.192404000 | -2.333880000 | -1.452434000 |
| 1                                               | -5.292871000 | -0.492509000 | 2.487807000  | 1                                               | 5.322697000  | 1.801534000  | 1.804856000  |
| 1                                               | -4.832911000 | -0.372280000 | 1.900465000  | 1                                               | 4.856608000  | 1.381657000  | 1.383640000  |
| 1                                               | -1.458356000 | 3.081905000  | -1.410896000 | 1                                               | 1.616308000  | -3.337773000 | 0.619193000  |
| 1                                               | -1.741999000 | 2.457037000  | -1.109124000 | 1                                               | 1.855825000  | -2.637289000 | 0.499121000  |
| 1                                               | -3.950588000 | 3.114153000  | 1.104400000  | 1                                               | 3.954074000  | -1.971229000 | 2.661026000  |
| 1                                               | -3.758714000 | 2.426549000  | 0.864584000  | 1                                               | 3.762445000  | -1.524490000 | 2.086070000  |
| 1                                               | -3.538461000 | -2.019359000 | -1.653214000 | 1                                               | 3.710560000  | 0.738440000  | -2.459474000 |
| 1                                               | -3.683764000 | -2.602612000 | -2.107486000 | 1                                               | 3.884991000  | 0.973222000  | -3.154976000 |
| 1                                               | -6.340561000 | 1.338708000  | 0.090440000  | 1                                               | 6.353194000  | -1.029940000 | 0.926408000  |
| 1                                               | -5.651687000 | 1.030903000  | 0.064320000  | 1                                               | 5.667043000  | -0.796856000 | 0.716289000  |
| 1                                               | -0.503571000 | -1.525200000 | -2.260705000 | 1                                               | 0.940023000  | -0.042184000 | -2.747396000 |

|                                                 |              |              |              |   |              |              |              |
|-------------------------------------------------|--------------|--------------|--------------|---|--------------|--------------|--------------|
| 1                                               | -0.610728000 | -1.918041000 | -2.889050000 | 1 | 0.817428000  | -0.097176000 | -3.487146000 |
| 1                                               | -2.506949000 | 0.568804000  | -3.421289000 | 1 | 2.716498000  | -2.425785000 | -2.480704000 |
| 1                                               | -2.573319000 | 0.439386000  | -2.683939000 | 1 | 2.745938000  | -1.896607000 | -1.947653000 |
| 1                                               | -5.633231000 | -1.308100000 | -0.233816000 | 1 | 5.713484000  | 0.953619000  | -0.859065000 |
| 1                                               | -6.283869000 | -1.683645000 | -0.284194000 | 1 | 6.379170000  | 1.228359000  | -1.077494000 |
| 1                                               | -4.432994000 | 2.657429000  | -1.934026000 | 1 | 4.550925000  | -3.296638000 | -0.054504000 |
| 1                                               | -4.172593000 | 2.082411000  | -1.525231000 | 1 | 4.270100000  | -2.599817000 | -0.038642000 |
| 1                                               | -5.007607000 | -0.039909000 | -2.106270000 | 1 | 5.118675000  | -1.140525000 | -1.698503000 |
| 1                                               | -5.484324000 | -0.072776000 | -2.687799000 | 1 | 5.622889000  | -1.453109000 | -2.164294000 |
| 1                                               | 1.448349000  | -3.296648000 | -0.801547000 | 1 | -1.297950000 | 2.103588000  | -2.777173000 |
| 1                                               | 1.712830000  | -2.613021000 | -0.644483000 | 1 | -1.414887000 | 1.655130000  | -2.186625000 |
| 1                                               | -4.115925000 | -3.159105000 | 1.078708000  | 1 | 4.238864000  | 3.235993000  | -0.860232000 |
| 1                                               | -3.903838000 | -2.480304000 | 0.834842000  | 1 | 4.008379000  | 2.542568000  | -0.682326000 |
| 1                                               | -2.865148000 | 1.247916000  | 3.376795000  | 1 | 2.950030000  | 0.852555000  | 3.522915000  |
| 1                                               | -2.830652000 | 0.997266000  | 2.670566000  | 1 | 2.891742000  | 0.653925000  | 2.802328000  |
| 1                                               | -2.221746000 | -1.448168000 | 2.332444000  | 1 | 2.374801000  | 2.499525000  | 1.160188000  |
| 1                                               | -2.124645000 | -1.833365000 | 2.969011000  | 1 | 2.323699000  | 3.174358000  | 1.484103000  |
| 1                                               | 0.832579000  | -2.113053000 | 1.821916000  | 1 | -3.005106000 | 2.822135000  | -0.568204000 |
| 1                                               | 0.857970000  | -2.654478000 | 2.338268000  | 1 | -3.077750000 | 3.551919000  | -0.730250000 |
| 1                                               | -1.297382000 | -3.421633000 | 0.035647000  | 1 | 1.412857000  | 2.776000000  | -1.936765000 |
| 1                                               | -1.461883000 | -2.691065000 | 0.016920000  | 1 | 1.685240000  | 2.212805000  | -1.521924000 |
|                                                 |              |              |              | 1 | -0.474913000 | 3.498609000  | 0.460375000  |
|                                                 |              |              |              | 1 | -0.417335000 | 2.766186000  | 0.311558000  |
| <b>C<sub>6</sub>H<sub>66</sub><sup>2-</sup></b> |              |              |              |   |              |              |              |
| SCF Energy = -267.19437 a. u.                   |              |              |              |   |              |              |              |
| 6                                               | 3.227789000  | 0.020692000  | 0.020397000  |   |              |              |              |
| 6                                               | 1.968753000  | 0.049164000  | 0.022487000  |   |              |              |              |
| 6                                               | 0.611518000  | 0.056130000  | 0.010883000  |   |              |              |              |
| 6                                               | -0.626254000 | 0.054953000  | 0.006870000  |   |              |              |              |
| 6                                               | -1.983330000 | 0.047241000  | 0.008951000  |   |              |              |              |
| 6                                               | -3.242363000 | 0.033443000  | 0.016786000  |   |              |              |              |
| 1                                               | -4.975723000 | -2.113587000 | -0.050466000 |   |              |              |              |
| 1                                               | -5.495815000 | -2.656764000 | -0.057607000 |   |              |              |              |
| 1                                               | -5.671335000 | -0.274961000 | 1.368112000  |   |              |              |              |
| 1                                               | -6.337253000 | -0.358041000 | 1.708271000  |   |              |              |              |
| 1                                               | -6.579281000 | -0.140330000 | -1.253319000 |   |              |              |              |
| 1                                               | -5.902874000 | -0.070015000 | -0.931964000 |   |              |              |              |
| 1                                               | -5.442500000 | 2.442550000  | 0.391166000  |   |              |              |              |
| 1                                               | -4.921827000 | 1.896788000  | 0.339328000  |   |              |              |              |
| 1                                               | -3.997834000 | -1.173473000 | -2.124617000 |   |              |              |              |
| 1                                               | -4.266895000 | -1.500095000 | -2.749178000 |   |              |              |              |
| 1                                               | -4.299537000 | 1.229281000  | 3.133010000  |   |              |              |              |
| 1                                               | -4.001079000 | 0.939251000  | 2.507276000  |   |              |              |              |
| 1                                               | -2.478698000 | 3.251471000  | -1.365251000 |   |              |              |              |
| 1                                               | -2.571697000 | 2.576562000  | -1.049194000 |   |              |              |              |
| 1                                               | -3.649110000 | -1.592228000 | 1.990366000  |   |              |              |              |
| 1                                               | -3.833202000 | -2.097775000 | 2.518212000  |   |              |              |              |
| 1                                               | -2.289565000 | 2.419986000  | 1.413658000  |   |              |              |              |
| 1                                               | -2.256751000 | 2.962680000  | 1.930324000  |   |              |              |              |
| 1                                               | -1.763141000 | -0.050491000 | 2.722002000  |   |              |              |              |
| 1                                               | -1.437983000 | 0.023496000  | 3.393181000  |   |              |              |              |
| 1                                               | -4.486865000 | 1.413227000  | -2.098011000 |   |              |              |              |
| 1                                               | -4.902552000 | 1.835683000  | -2.559272000 |   |              |              |              |
| 1                                               | -2.573120000 | -3.305142000 | -0.720172000 |   |              |              |              |



|   |              |              |              |
|---|--------------|--------------|--------------|
| 1 | -2.645622000 | -2.623396000 | -0.413374000 |
| 1 | 0.197526000  | 3.735622000  | 0.216486000  |
| 1 | 0.096278000  | 3.064488000  | -0.096654000 |
| 1 | 0.644607000  | 2.133956000  | 2.950015000  |
| 1 | 0.545265000  | 1.793694000  | 2.291333000  |
| 1 | -0.945366000 | -2.931079000 | 1.831725000  |
| 1 | -0.826963000 | -2.206137000 | 1.688602000  |
| 1 | 5.522418000  | 2.406163000  | 0.067803000  |
| 1 | 4.994443000  | 1.865663000  | 0.061805000  |
| 1 | 1.171452000  | -0.946764000 | 3.249806000  |
| 1 | 1.476255000  | -0.655030000 | 2.630809000  |
| 1 | 3.740564000  | 1.241706000  | 3.188147000  |
| 1 | 3.630161000  | 0.926934000  | 2.513618000  |
| 1 | 4.239456000  | -1.332457000 | -2.210873000 |
| 1 | 4.531301000  | -1.654933000 | -2.823483000 |
| 1 | 6.227094000  | -0.134260000 | 1.802814000  |
| 1 | 5.560817000  | -0.074863000 | 1.457275000  |
| 1 | 2.143292000  | -2.268613000 | -1.437338000 |
| 1 | 1.943990000  | -2.791253000 | -1.936453000 |
| 1 | 1.941211000  | -3.241599000 | 1.130031000  |
| 1 | 2.064010000  | -2.514312000 | 0.992835000  |
| 1 | 5.886004000  | -0.243889000 | -0.815849000 |
| 1 | 6.562916000  | -0.330817000 | -1.132773000 |
| 1 | 4.086102000  | -1.843264000 | 2.936812000  |
| 1 | 3.816941000  | -1.512555000 | 2.318653000  |
| 1 | 4.565111000  | -2.147936000 | 0.067105000  |
| 1 | 4.911000000  | -2.817375000 | 0.120107000  |
| 1 | -0.838533000 | -1.737972000 | -2.925156000 |
| 1 | -0.719786000 | -1.587196000 | -2.201443000 |
| 1 | 4.771968000  | 1.369916000  | -2.844309000 |
| 1 | 4.458512000  | 1.073613000  | -2.228693000 |
| 1 | 2.845080000  | 3.423759000  | 1.376593000  |
| 1 | 2.900275000  | 2.752405000  | 1.047420000  |
| 1 | 2.691570000  | 2.434148000  | -1.348174000 |
| 1 | 2.627010000  | 3.104162000  | -1.680607000 |
| 1 | -2.318141000 | 0.521690000  | -2.734896000 |
| 1 | -2.220565000 | 0.826194000  | -3.413055000 |
| 1 | 1.954252000  | 0.053875000  | -3.434950000 |
| 1 | 2.078723000  | -0.045582000 | -2.701528000 |
| 1 | 0.016300000  | 2.433562000  | -2.739660000 |
| 1 | 0.100037000  | 1.774391000  | -2.397176000 |
| 1 | 0.025789000  | -4.596986000 | -0.857108000 |
| 1 | -0.054793000 | -3.925490000 | -0.540342000 |

25. Cartesian coordinates in Å unit of optimized geometry of  $(\text{HC}_n)^-(\text{H}_2)_m$  and  $(\text{C}_n)^{2-}(\text{H}_2)_m$  complexes at CCSD/aug-cc-pVDZ level

|                          |                          |
|--------------------------|--------------------------|
| $\text{C}_2\text{H}_3^-$ | $\text{C}_2\text{H}_5^-$ |
|--------------------------|--------------------------|

|                                                                                                                                                                                                                                                                                                                                                                                                                                                                                                                                                                                                                                                                                                                                                                                                                                                                                                 |              |              |              |              |   |              |              |              |   |              |              |              |   |              |              |              |   |              |              |              |                                                                                                                                                                                                                                                                                                                                                                                                                                                                                                                                                                                                                                                                   |              |             |              |              |              |              |              |             |              |              |             |             |              |              |              |                                                                                                                                                                                                                                                                                                                                                                                                                                                                                                                                                                                                                                                                                                                                                                                                                                                                                                                                                                                                                                                                 |   |              |              |              |   |              |              |              |   |              |              |              |   |              |              |              |   |              |              |              |   |              |              |              |   |              |              |              |   |              |             |              |   |              |              |              |   |              |              |             |   |             |             |             |
|-------------------------------------------------------------------------------------------------------------------------------------------------------------------------------------------------------------------------------------------------------------------------------------------------------------------------------------------------------------------------------------------------------------------------------------------------------------------------------------------------------------------------------------------------------------------------------------------------------------------------------------------------------------------------------------------------------------------------------------------------------------------------------------------------------------------------------------------------------------------------------------------------|--------------|--------------|--------------|--------------|---|--------------|--------------|--------------|---|--------------|--------------|--------------|---|--------------|--------------|--------------|---|--------------|--------------|--------------|-------------------------------------------------------------------------------------------------------------------------------------------------------------------------------------------------------------------------------------------------------------------------------------------------------------------------------------------------------------------------------------------------------------------------------------------------------------------------------------------------------------------------------------------------------------------------------------------------------------------------------------------------------------------|--------------|-------------|--------------|--------------|--------------|--------------|--------------|-------------|--------------|--------------|-------------|-------------|--------------|--------------|--------------|-----------------------------------------------------------------------------------------------------------------------------------------------------------------------------------------------------------------------------------------------------------------------------------------------------------------------------------------------------------------------------------------------------------------------------------------------------------------------------------------------------------------------------------------------------------------------------------------------------------------------------------------------------------------------------------------------------------------------------------------------------------------------------------------------------------------------------------------------------------------------------------------------------------------------------------------------------------------------------------------------------------------------------------------------------------------|---|--------------|--------------|--------------|---|--------------|--------------|--------------|---|--------------|--------------|--------------|---|--------------|--------------|--------------|---|--------------|--------------|--------------|---|--------------|--------------|--------------|---|--------------|--------------|--------------|---|--------------|-------------|--------------|---|--------------|--------------|--------------|---|--------------|--------------|-------------|---|-------------|-------------|-------------|
| <p>CCSD(T) Energy = -77.75680 a. u.</p> <table> <tbody> <tr><td>6</td><td>-0.254656000</td><td>0.000087000</td><td>-0.000099000</td></tr> <tr><td>6</td><td>1.012328000</td><td>-0.000214000</td><td>-0.000114000</td></tr> <tr><td>1</td><td>2.096144000</td><td>0.000841000</td><td>0.000814000</td></tr> <tr><td>1</td><td>-3.707280000</td><td>0.000754000</td><td>-0.000245000</td></tr> <tr><td>1</td><td>-2.934897000</td><td>-0.000839000</td><td>0.000707000</td></tr> </tbody> </table>                                                                                                                                                                                                                                                                                                                                                                                               | 6            | -0.254656000 | 0.000087000  | -0.000099000 | 6 | 1.012328000  | -0.000214000 | -0.000114000 | 1 | 2.096144000  | 0.000841000  | 0.000814000  | 1 | -3.707280000 | 0.000754000  | -0.000245000 | 1 | -2.934897000 | -0.000839000 | 0.000707000  | <p>CCSD(T) Energy = -78.93302 a. u.</p> <table> <tbody> <tr><td>6</td><td>0.027530000</td><td>-0.214063000</td><td>-0.000425000</td></tr> <tr><td>6</td><td>1.271529000</td><td>0.023056000</td><td>0.000129000</td></tr> <tr><td>1</td><td>2.337995000</td><td>0.215839000</td><td>0.000802000</td></tr> <tr><td>1</td><td>-2.452009000</td><td>-1.208819000</td><td>0.000241000</td></tr> <tr><td>1</td><td>-3.167915000</td><td>-1.496816000</td><td>0.000548000</td></tr> <tr><td>1</td><td>-2.539739000</td><td>2.078495000</td><td>0.000161000</td></tr> <tr><td>1</td><td>-1.972687000</td><td>1.557344000</td><td>0.000026000</td></tr> </tbody> </table> | 6            | 0.027530000 | -0.214063000 | -0.000425000 | 6            | 1.271529000  | 0.023056000  | 0.000129000 | 1            | 2.337995000  | 0.215839000 | 0.000802000 | 1            | -2.452009000 | -1.208819000 | 0.000241000                                                                                                                                                                                                                                                                                                                                                                                                                                                                                                                                                                                                                                                                                                                                                                                                                                                                                                                                                                                                                                                     | 1 | -3.167915000 | -1.496816000 | 0.000548000  | 1 | -2.539739000 | 2.078495000  | 0.000161000  | 1 | -1.972687000 | 1.557344000  | 0.000026000  |   |              |              |              |   |              |              |              |   |              |              |              |   |              |              |              |   |              |             |              |   |              |              |              |   |              |              |             |   |             |             |             |
| 6                                                                                                                                                                                                                                                                                                                                                                                                                                                                                                                                                                                                                                                                                                                                                                                                                                                                                               | -0.254656000 | 0.000087000  | -0.000099000 |              |   |              |              |              |   |              |              |              |   |              |              |              |   |              |              |              |                                                                                                                                                                                                                                                                                                                                                                                                                                                                                                                                                                                                                                                                   |              |             |              |              |              |              |              |             |              |              |             |             |              |              |              |                                                                                                                                                                                                                                                                                                                                                                                                                                                                                                                                                                                                                                                                                                                                                                                                                                                                                                                                                                                                                                                                 |   |              |              |              |   |              |              |              |   |              |              |              |   |              |              |              |   |              |              |              |   |              |              |              |   |              |              |              |   |              |             |              |   |              |              |              |   |              |              |             |   |             |             |             |
| 6                                                                                                                                                                                                                                                                                                                                                                                                                                                                                                                                                                                                                                                                                                                                                                                                                                                                                               | 1.012328000  | -0.000214000 | -0.000114000 |              |   |              |              |              |   |              |              |              |   |              |              |              |   |              |              |              |                                                                                                                                                                                                                                                                                                                                                                                                                                                                                                                                                                                                                                                                   |              |             |              |              |              |              |              |             |              |              |             |             |              |              |              |                                                                                                                                                                                                                                                                                                                                                                                                                                                                                                                                                                                                                                                                                                                                                                                                                                                                                                                                                                                                                                                                 |   |              |              |              |   |              |              |              |   |              |              |              |   |              |              |              |   |              |              |              |   |              |              |              |   |              |              |              |   |              |             |              |   |              |              |              |   |              |              |             |   |             |             |             |
| 1                                                                                                                                                                                                                                                                                                                                                                                                                                                                                                                                                                                                                                                                                                                                                                                                                                                                                               | 2.096144000  | 0.000841000  | 0.000814000  |              |   |              |              |              |   |              |              |              |   |              |              |              |   |              |              |              |                                                                                                                                                                                                                                                                                                                                                                                                                                                                                                                                                                                                                                                                   |              |             |              |              |              |              |              |             |              |              |             |             |              |              |              |                                                                                                                                                                                                                                                                                                                                                                                                                                                                                                                                                                                                                                                                                                                                                                                                                                                                                                                                                                                                                                                                 |   |              |              |              |   |              |              |              |   |              |              |              |   |              |              |              |   |              |              |              |   |              |              |              |   |              |              |              |   |              |             |              |   |              |              |              |   |              |              |             |   |             |             |             |
| 1                                                                                                                                                                                                                                                                                                                                                                                                                                                                                                                                                                                                                                                                                                                                                                                                                                                                                               | -3.707280000 | 0.000754000  | -0.000245000 |              |   |              |              |              |   |              |              |              |   |              |              |              |   |              |              |              |                                                                                                                                                                                                                                                                                                                                                                                                                                                                                                                                                                                                                                                                   |              |             |              |              |              |              |              |             |              |              |             |             |              |              |              |                                                                                                                                                                                                                                                                                                                                                                                                                                                                                                                                                                                                                                                                                                                                                                                                                                                                                                                                                                                                                                                                 |   |              |              |              |   |              |              |              |   |              |              |              |   |              |              |              |   |              |              |              |   |              |              |              |   |              |              |              |   |              |             |              |   |              |              |              |   |              |              |             |   |             |             |             |
| 1                                                                                                                                                                                                                                                                                                                                                                                                                                                                                                                                                                                                                                                                                                                                                                                                                                                                                               | -2.934897000 | -0.000839000 | 0.000707000  |              |   |              |              |              |   |              |              |              |   |              |              |              |   |              |              |              |                                                                                                                                                                                                                                                                                                                                                                                                                                                                                                                                                                                                                                                                   |              |             |              |              |              |              |              |             |              |              |             |             |              |              |              |                                                                                                                                                                                                                                                                                                                                                                                                                                                                                                                                                                                                                                                                                                                                                                                                                                                                                                                                                                                                                                                                 |   |              |              |              |   |              |              |              |   |              |              |              |   |              |              |              |   |              |              |              |   |              |              |              |   |              |              |              |   |              |             |              |   |              |              |              |   |              |              |             |   |             |             |             |
| 6                                                                                                                                                                                                                                                                                                                                                                                                                                                                                                                                                                                                                                                                                                                                                                                                                                                                                               | 0.027530000  | -0.214063000 | -0.000425000 |              |   |              |              |              |   |              |              |              |   |              |              |              |   |              |              |              |                                                                                                                                                                                                                                                                                                                                                                                                                                                                                                                                                                                                                                                                   |              |             |              |              |              |              |              |             |              |              |             |             |              |              |              |                                                                                                                                                                                                                                                                                                                                                                                                                                                                                                                                                                                                                                                                                                                                                                                                                                                                                                                                                                                                                                                                 |   |              |              |              |   |              |              |              |   |              |              |              |   |              |              |              |   |              |              |              |   |              |              |              |   |              |              |              |   |              |             |              |   |              |              |              |   |              |              |             |   |             |             |             |
| 6                                                                                                                                                                                                                                                                                                                                                                                                                                                                                                                                                                                                                                                                                                                                                                                                                                                                                               | 1.271529000  | 0.023056000  | 0.000129000  |              |   |              |              |              |   |              |              |              |   |              |              |              |   |              |              |              |                                                                                                                                                                                                                                                                                                                                                                                                                                                                                                                                                                                                                                                                   |              |             |              |              |              |              |              |             |              |              |             |             |              |              |              |                                                                                                                                                                                                                                                                                                                                                                                                                                                                                                                                                                                                                                                                                                                                                                                                                                                                                                                                                                                                                                                                 |   |              |              |              |   |              |              |              |   |              |              |              |   |              |              |              |   |              |              |              |   |              |              |              |   |              |              |              |   |              |             |              |   |              |              |              |   |              |              |             |   |             |             |             |
| 1                                                                                                                                                                                                                                                                                                                                                                                                                                                                                                                                                                                                                                                                                                                                                                                                                                                                                               | 2.337995000  | 0.215839000  | 0.000802000  |              |   |              |              |              |   |              |              |              |   |              |              |              |   |              |              |              |                                                                                                                                                                                                                                                                                                                                                                                                                                                                                                                                                                                                                                                                   |              |             |              |              |              |              |              |             |              |              |             |             |              |              |              |                                                                                                                                                                                                                                                                                                                                                                                                                                                                                                                                                                                                                                                                                                                                                                                                                                                                                                                                                                                                                                                                 |   |              |              |              |   |              |              |              |   |              |              |              |   |              |              |              |   |              |              |              |   |              |              |              |   |              |              |              |   |              |             |              |   |              |              |              |   |              |              |             |   |             |             |             |
| 1                                                                                                                                                                                                                                                                                                                                                                                                                                                                                                                                                                                                                                                                                                                                                                                                                                                                                               | -2.452009000 | -1.208819000 | 0.000241000  |              |   |              |              |              |   |              |              |              |   |              |              |              |   |              |              |              |                                                                                                                                                                                                                                                                                                                                                                                                                                                                                                                                                                                                                                                                   |              |             |              |              |              |              |              |             |              |              |             |             |              |              |              |                                                                                                                                                                                                                                                                                                                                                                                                                                                                                                                                                                                                                                                                                                                                                                                                                                                                                                                                                                                                                                                                 |   |              |              |              |   |              |              |              |   |              |              |              |   |              |              |              |   |              |              |              |   |              |              |              |   |              |              |              |   |              |             |              |   |              |              |              |   |              |              |             |   |             |             |             |
| 1                                                                                                                                                                                                                                                                                                                                                                                                                                                                                                                                                                                                                                                                                                                                                                                                                                                                                               | -3.167915000 | -1.496816000 | 0.000548000  |              |   |              |              |              |   |              |              |              |   |              |              |              |   |              |              |              |                                                                                                                                                                                                                                                                                                                                                                                                                                                                                                                                                                                                                                                                   |              |             |              |              |              |              |              |             |              |              |             |             |              |              |              |                                                                                                                                                                                                                                                                                                                                                                                                                                                                                                                                                                                                                                                                                                                                                                                                                                                                                                                                                                                                                                                                 |   |              |              |              |   |              |              |              |   |              |              |              |   |              |              |              |   |              |              |              |   |              |              |              |   |              |              |              |   |              |             |              |   |              |              |              |   |              |              |             |   |             |             |             |
| 1                                                                                                                                                                                                                                                                                                                                                                                                                                                                                                                                                                                                                                                                                                                                                                                                                                                                                               | -2.539739000 | 2.078495000  | 0.000161000  |              |   |              |              |              |   |              |              |              |   |              |              |              |   |              |              |              |                                                                                                                                                                                                                                                                                                                                                                                                                                                                                                                                                                                                                                                                   |              |             |              |              |              |              |              |             |              |              |             |             |              |              |              |                                                                                                                                                                                                                                                                                                                                                                                                                                                                                                                                                                                                                                                                                                                                                                                                                                                                                                                                                                                                                                                                 |   |              |              |              |   |              |              |              |   |              |              |              |   |              |              |              |   |              |              |              |   |              |              |              |   |              |              |              |   |              |             |              |   |              |              |              |   |              |              |             |   |             |             |             |
| 1                                                                                                                                                                                                                                                                                                                                                                                                                                                                                                                                                                                                                                                                                                                                                                                                                                                                                               | -1.972687000 | 1.557344000  | 0.000026000  |              |   |              |              |              |   |              |              |              |   |              |              |              |   |              |              |              |                                                                                                                                                                                                                                                                                                                                                                                                                                                                                                                                                                                                                                                                   |              |             |              |              |              |              |              |             |              |              |             |             |              |              |              |                                                                                                                                                                                                                                                                                                                                                                                                                                                                                                                                                                                                                                                                                                                                                                                                                                                                                                                                                                                                                                                                 |   |              |              |              |   |              |              |              |   |              |              |              |   |              |              |              |   |              |              |              |   |              |              |              |   |              |              |              |   |              |             |              |   |              |              |              |   |              |              |             |   |             |             |             |
| <p><b>C<sub>2</sub>H<sub>7</sub><sup>-</sup></b></p> <p>CCSD(T) Energy = -80.10944 a. u.</p> <table> <tbody> <tr><td>6</td><td>0.235355000</td><td>-0.025259000</td><td>0.021087000</td></tr> <tr><td>6</td><td>1.500589000</td><td>0.000428000</td><td>-0.000971000</td></tr> <tr><td>1</td><td>2.583980000</td><td>0.021155000</td><td>-0.018466000</td></tr> <tr><td>1</td><td>-1.866535000</td><td>-1.045196000</td><td>-1.244833000</td></tr> <tr><td>1</td><td>-2.472000000</td><td>-1.343016000</td><td>-1.616259000</td></tr> <tr><td>1</td><td>-2.410158000</td><td>2.106201000</td><td>-0.400138000</td></tr> <tr><td>1</td><td>-1.818525000</td><td>1.622563000</td><td>-0.304016000</td></tr> <tr><td>1</td><td>-2.524783000</td><td>-0.680299000</td><td>1.949795000</td></tr> <tr><td>1</td><td>-1.907641000</td><td>-0.532420000</td><td>1.513220000</td></tr> </tbody> </table> | 6            | 0.235355000  | -0.025259000 | 0.021087000  | 6 | 1.500589000  | 0.000428000  | -0.000971000 | 1 | 2.583980000  | 0.021155000  | -0.018466000 | 1 | -1.866535000 | -1.045196000 | -1.244833000 | 1 | -2.472000000 | -1.343016000 | -1.616259000 | 1                                                                                                                                                                                                                                                                                                                                                                                                                                                                                                                                                                                                                                                                 | -2.410158000 | 2.106201000 | -0.400138000 | 1            | -1.818525000 | 1.622563000  | -0.304016000 | 1           | -2.524783000 | -0.680299000 | 1.949795000 | 1           | -1.907641000 | -0.532420000 | 1.513220000  | <p><b>C<sub>4</sub>H<sub>3</sub><sup>-</sup></b></p> <p>CCSD(T) Energy = -153.79122 a. u.</p> <table> <tbody> <tr><td>6</td><td>-0.966101000</td><td>-0.000186000</td><td>0.000081000</td></tr> <tr><td>6</td><td>0.427205000</td><td>-0.000571000</td><td>-0.000092000</td></tr> <tr><td>6</td><td>1.697354000</td><td>-0.001483000</td><td>0.000013000</td></tr> <tr><td>6</td><td>-2.204936000</td><td>0.000991000</td><td>-0.000064000</td></tr> <tr><td>1</td><td>-3.278478000</td><td>0.000975000</td><td>0.000231000</td></tr> <tr><td>1</td><td>4.393627000</td><td>0.002452000</td><td>0.000321000</td></tr> <tr><td>1</td><td>5.163725000</td><td>0.004072000</td><td>-0.000181000</td></tr> </tbody> </table>                                                                                                                                                                                                                                                                                                                                        | 6 | -0.966101000 | -0.000186000 | 0.000081000  | 6 | 0.427205000  | -0.000571000 | -0.000092000 | 6 | 1.697354000  | -0.001483000 | 0.000013000  | 6 | -2.204936000 | 0.000991000  | -0.000064000 | 1 | -3.278478000 | 0.000975000  | 0.000231000  | 1 | 4.393627000  | 0.002452000  | 0.000321000  | 1 | 5.163725000  | 0.004072000  | -0.000181000 |   |              |             |              |   |              |              |              |   |              |              |             |   |             |             |             |
| 6                                                                                                                                                                                                                                                                                                                                                                                                                                                                                                                                                                                                                                                                                                                                                                                                                                                                                               | 0.235355000  | -0.025259000 | 0.021087000  |              |   |              |              |              |   |              |              |              |   |              |              |              |   |              |              |              |                                                                                                                                                                                                                                                                                                                                                                                                                                                                                                                                                                                                                                                                   |              |             |              |              |              |              |              |             |              |              |             |             |              |              |              |                                                                                                                                                                                                                                                                                                                                                                                                                                                                                                                                                                                                                                                                                                                                                                                                                                                                                                                                                                                                                                                                 |   |              |              |              |   |              |              |              |   |              |              |              |   |              |              |              |   |              |              |              |   |              |              |              |   |              |              |              |   |              |             |              |   |              |              |              |   |              |              |             |   |             |             |             |
| 6                                                                                                                                                                                                                                                                                                                                                                                                                                                                                                                                                                                                                                                                                                                                                                                                                                                                                               | 1.500589000  | 0.000428000  | -0.000971000 |              |   |              |              |              |   |              |              |              |   |              |              |              |   |              |              |              |                                                                                                                                                                                                                                                                                                                                                                                                                                                                                                                                                                                                                                                                   |              |             |              |              |              |              |              |             |              |              |             |             |              |              |              |                                                                                                                                                                                                                                                                                                                                                                                                                                                                                                                                                                                                                                                                                                                                                                                                                                                                                                                                                                                                                                                                 |   |              |              |              |   |              |              |              |   |              |              |              |   |              |              |              |   |              |              |              |   |              |              |              |   |              |              |              |   |              |             |              |   |              |              |              |   |              |              |             |   |             |             |             |
| 1                                                                                                                                                                                                                                                                                                                                                                                                                                                                                                                                                                                                                                                                                                                                                                                                                                                                                               | 2.583980000  | 0.021155000  | -0.018466000 |              |   |              |              |              |   |              |              |              |   |              |              |              |   |              |              |              |                                                                                                                                                                                                                                                                                                                                                                                                                                                                                                                                                                                                                                                                   |              |             |              |              |              |              |              |             |              |              |             |             |              |              |              |                                                                                                                                                                                                                                                                                                                                                                                                                                                                                                                                                                                                                                                                                                                                                                                                                                                                                                                                                                                                                                                                 |   |              |              |              |   |              |              |              |   |              |              |              |   |              |              |              |   |              |              |              |   |              |              |              |   |              |              |              |   |              |             |              |   |              |              |              |   |              |              |             |   |             |             |             |
| 1                                                                                                                                                                                                                                                                                                                                                                                                                                                                                                                                                                                                                                                                                                                                                                                                                                                                                               | -1.866535000 | -1.045196000 | -1.244833000 |              |   |              |              |              |   |              |              |              |   |              |              |              |   |              |              |              |                                                                                                                                                                                                                                                                                                                                                                                                                                                                                                                                                                                                                                                                   |              |             |              |              |              |              |              |             |              |              |             |             |              |              |              |                                                                                                                                                                                                                                                                                                                                                                                                                                                                                                                                                                                                                                                                                                                                                                                                                                                                                                                                                                                                                                                                 |   |              |              |              |   |              |              |              |   |              |              |              |   |              |              |              |   |              |              |              |   |              |              |              |   |              |              |              |   |              |             |              |   |              |              |              |   |              |              |             |   |             |             |             |
| 1                                                                                                                                                                                                                                                                                                                                                                                                                                                                                                                                                                                                                                                                                                                                                                                                                                                                                               | -2.472000000 | -1.343016000 | -1.616259000 |              |   |              |              |              |   |              |              |              |   |              |              |              |   |              |              |              |                                                                                                                                                                                                                                                                                                                                                                                                                                                                                                                                                                                                                                                                   |              |             |              |              |              |              |              |             |              |              |             |             |              |              |              |                                                                                                                                                                                                                                                                                                                                                                                                                                                                                                                                                                                                                                                                                                                                                                                                                                                                                                                                                                                                                                                                 |   |              |              |              |   |              |              |              |   |              |              |              |   |              |              |              |   |              |              |              |   |              |              |              |   |              |              |              |   |              |             |              |   |              |              |              |   |              |              |             |   |             |             |             |
| 1                                                                                                                                                                                                                                                                                                                                                                                                                                                                                                                                                                                                                                                                                                                                                                                                                                                                                               | -2.410158000 | 2.106201000  | -0.400138000 |              |   |              |              |              |   |              |              |              |   |              |              |              |   |              |              |              |                                                                                                                                                                                                                                                                                                                                                                                                                                                                                                                                                                                                                                                                   |              |             |              |              |              |              |              |             |              |              |             |             |              |              |              |                                                                                                                                                                                                                                                                                                                                                                                                                                                                                                                                                                                                                                                                                                                                                                                                                                                                                                                                                                                                                                                                 |   |              |              |              |   |              |              |              |   |              |              |              |   |              |              |              |   |              |              |              |   |              |              |              |   |              |              |              |   |              |             |              |   |              |              |              |   |              |              |             |   |             |             |             |
| 1                                                                                                                                                                                                                                                                                                                                                                                                                                                                                                                                                                                                                                                                                                                                                                                                                                                                                               | -1.818525000 | 1.622563000  | -0.304016000 |              |   |              |              |              |   |              |              |              |   |              |              |              |   |              |              |              |                                                                                                                                                                                                                                                                                                                                                                                                                                                                                                                                                                                                                                                                   |              |             |              |              |              |              |              |             |              |              |             |             |              |              |              |                                                                                                                                                                                                                                                                                                                                                                                                                                                                                                                                                                                                                                                                                                                                                                                                                                                                                                                                                                                                                                                                 |   |              |              |              |   |              |              |              |   |              |              |              |   |              |              |              |   |              |              |              |   |              |              |              |   |              |              |              |   |              |             |              |   |              |              |              |   |              |              |             |   |             |             |             |
| 1                                                                                                                                                                                                                                                                                                                                                                                                                                                                                                                                                                                                                                                                                                                                                                                                                                                                                               | -2.524783000 | -0.680299000 | 1.949795000  |              |   |              |              |              |   |              |              |              |   |              |              |              |   |              |              |              |                                                                                                                                                                                                                                                                                                                                                                                                                                                                                                                                                                                                                                                                   |              |             |              |              |              |              |              |             |              |              |             |             |              |              |              |                                                                                                                                                                                                                                                                                                                                                                                                                                                                                                                                                                                                                                                                                                                                                                                                                                                                                                                                                                                                                                                                 |   |              |              |              |   |              |              |              |   |              |              |              |   |              |              |              |   |              |              |              |   |              |              |              |   |              |              |              |   |              |             |              |   |              |              |              |   |              |              |             |   |             |             |             |
| 1                                                                                                                                                                                                                                                                                                                                                                                                                                                                                                                                                                                                                                                                                                                                                                                                                                                                                               | -1.907641000 | -0.532420000 | 1.513220000  |              |   |              |              |              |   |              |              |              |   |              |              |              |   |              |              |              |                                                                                                                                                                                                                                                                                                                                                                                                                                                                                                                                                                                                                                                                   |              |             |              |              |              |              |              |             |              |              |             |             |              |              |              |                                                                                                                                                                                                                                                                                                                                                                                                                                                                                                                                                                                                                                                                                                                                                                                                                                                                                                                                                                                                                                                                 |   |              |              |              |   |              |              |              |   |              |              |              |   |              |              |              |   |              |              |              |   |              |              |              |   |              |              |              |   |              |             |              |   |              |              |              |   |              |              |             |   |             |             |             |
| 6                                                                                                                                                                                                                                                                                                                                                                                                                                                                                                                                                                                                                                                                                                                                                                                                                                                                                               | -0.966101000 | -0.000186000 | 0.000081000  |              |   |              |              |              |   |              |              |              |   |              |              |              |   |              |              |              |                                                                                                                                                                                                                                                                                                                                                                                                                                                                                                                                                                                                                                                                   |              |             |              |              |              |              |              |             |              |              |             |             |              |              |              |                                                                                                                                                                                                                                                                                                                                                                                                                                                                                                                                                                                                                                                                                                                                                                                                                                                                                                                                                                                                                                                                 |   |              |              |              |   |              |              |              |   |              |              |              |   |              |              |              |   |              |              |              |   |              |              |              |   |              |              |              |   |              |             |              |   |              |              |              |   |              |              |             |   |             |             |             |
| 6                                                                                                                                                                                                                                                                                                                                                                                                                                                                                                                                                                                                                                                                                                                                                                                                                                                                                               | 0.427205000  | -0.000571000 | -0.000092000 |              |   |              |              |              |   |              |              |              |   |              |              |              |   |              |              |              |                                                                                                                                                                                                                                                                                                                                                                                                                                                                                                                                                                                                                                                                   |              |             |              |              |              |              |              |             |              |              |             |             |              |              |              |                                                                                                                                                                                                                                                                                                                                                                                                                                                                                                                                                                                                                                                                                                                                                                                                                                                                                                                                                                                                                                                                 |   |              |              |              |   |              |              |              |   |              |              |              |   |              |              |              |   |              |              |              |   |              |              |              |   |              |              |              |   |              |             |              |   |              |              |              |   |              |              |             |   |             |             |             |
| 6                                                                                                                                                                                                                                                                                                                                                                                                                                                                                                                                                                                                                                                                                                                                                                                                                                                                                               | 1.697354000  | -0.001483000 | 0.000013000  |              |   |              |              |              |   |              |              |              |   |              |              |              |   |              |              |              |                                                                                                                                                                                                                                                                                                                                                                                                                                                                                                                                                                                                                                                                   |              |             |              |              |              |              |              |             |              |              |             |             |              |              |              |                                                                                                                                                                                                                                                                                                                                                                                                                                                                                                                                                                                                                                                                                                                                                                                                                                                                                                                                                                                                                                                                 |   |              |              |              |   |              |              |              |   |              |              |              |   |              |              |              |   |              |              |              |   |              |              |              |   |              |              |              |   |              |             |              |   |              |              |              |   |              |              |             |   |             |             |             |
| 6                                                                                                                                                                                                                                                                                                                                                                                                                                                                                                                                                                                                                                                                                                                                                                                                                                                                                               | -2.204936000 | 0.000991000  | -0.000064000 |              |   |              |              |              |   |              |              |              |   |              |              |              |   |              |              |              |                                                                                                                                                                                                                                                                                                                                                                                                                                                                                                                                                                                                                                                                   |              |             |              |              |              |              |              |             |              |              |             |             |              |              |              |                                                                                                                                                                                                                                                                                                                                                                                                                                                                                                                                                                                                                                                                                                                                                                                                                                                                                                                                                                                                                                                                 |   |              |              |              |   |              |              |              |   |              |              |              |   |              |              |              |   |              |              |              |   |              |              |              |   |              |              |              |   |              |             |              |   |              |              |              |   |              |              |             |   |             |             |             |
| 1                                                                                                                                                                                                                                                                                                                                                                                                                                                                                                                                                                                                                                                                                                                                                                                                                                                                                               | -3.278478000 | 0.000975000  | 0.000231000  |              |   |              |              |              |   |              |              |              |   |              |              |              |   |              |              |              |                                                                                                                                                                                                                                                                                                                                                                                                                                                                                                                                                                                                                                                                   |              |             |              |              |              |              |              |             |              |              |             |             |              |              |              |                                                                                                                                                                                                                                                                                                                                                                                                                                                                                                                                                                                                                                                                                                                                                                                                                                                                                                                                                                                                                                                                 |   |              |              |              |   |              |              |              |   |              |              |              |   |              |              |              |   |              |              |              |   |              |              |              |   |              |              |              |   |              |             |              |   |              |              |              |   |              |              |             |   |             |             |             |
| 1                                                                                                                                                                                                                                                                                                                                                                                                                                                                                                                                                                                                                                                                                                                                                                                                                                                                                               | 4.393627000  | 0.002452000  | 0.000321000  |              |   |              |              |              |   |              |              |              |   |              |              |              |   |              |              |              |                                                                                                                                                                                                                                                                                                                                                                                                                                                                                                                                                                                                                                                                   |              |             |              |              |              |              |              |             |              |              |             |             |              |              |              |                                                                                                                                                                                                                                                                                                                                                                                                                                                                                                                                                                                                                                                                                                                                                                                                                                                                                                                                                                                                                                                                 |   |              |              |              |   |              |              |              |   |              |              |              |   |              |              |              |   |              |              |              |   |              |              |              |   |              |              |              |   |              |             |              |   |              |              |              |   |              |              |             |   |             |             |             |
| 1                                                                                                                                                                                                                                                                                                                                                                                                                                                                                                                                                                                                                                                                                                                                                                                                                                                                                               | 5.163725000  | 0.004072000  | -0.000181000 |              |   |              |              |              |   |              |              |              |   |              |              |              |   |              |              |              |                                                                                                                                                                                                                                                                                                                                                                                                                                                                                                                                                                                                                                                                   |              |             |              |              |              |              |              |             |              |              |             |             |              |              |              |                                                                                                                                                                                                                                                                                                                                                                                                                                                                                                                                                                                                                                                                                                                                                                                                                                                                                                                                                                                                                                                                 |   |              |              |              |   |              |              |              |   |              |              |              |   |              |              |              |   |              |              |              |   |              |              |              |   |              |              |              |   |              |             |              |   |              |              |              |   |              |              |             |   |             |             |             |
| <p><b>C<sub>4</sub>H<sub>5</sub><sup>-</sup></b></p> <p>CCSD(T) Energy = -154.96667 a. u.</p> <table> <tbody> <tr><td>6</td><td>-1.225700000</td><td>-0.024560000</td><td>-0.000219000</td></tr> <tr><td>6</td><td>0.167146000</td><td>-0.062580000</td><td>0.000024000</td></tr> <tr><td>6</td><td>1.429513000</td><td>-0.198009000</td><td>0.000168000</td></tr> <tr><td>6</td><td>-2.460453000</td><td>0.076510000</td><td>-0.000267000</td></tr> <tr><td>1</td><td>-3.534095000</td><td>0.072106000</td><td>-0.000128000</td></tr> <tr><td>1</td><td>3.454413000</td><td>1.621824000</td><td>0.000374000</td></tr> <tr><td>1</td><td>4.009599000</td><td>2.152988000</td><td>0.000420000</td></tr> <tr><td>1</td><td>3.946346000</td><td>-1.154425000</td><td>0.000502000</td></tr> <tr><td>1</td><td>4.660699000</td><td>-1.440666000</td><td>0.000599000</td></tr> </tbody> </table>      | 6            | -1.225700000 | -0.024560000 | -0.000219000 | 6 | 0.167146000  | -0.062580000 | 0.000024000  | 6 | 1.429513000  | -0.198009000 | 0.000168000  | 6 | -2.460453000 | 0.076510000  | -0.000267000 | 1 | -3.534095000 | 0.072106000  | -0.000128000 | 1                                                                                                                                                                                                                                                                                                                                                                                                                                                                                                                                                                                                                                                                 | 3.454413000  | 1.621824000 | 0.000374000  | 1            | 4.009599000  | 2.152988000  | 0.000420000  | 1           | 3.946346000  | -1.154425000 | 0.000502000 | 1           | 4.660699000  | -1.440666000 | 0.000599000  | <p><b>C<sub>4</sub>H<sub>7</sub><sup>-</sup></b></p> <p>CCSD(T) Energy = -156.14247 a. u.</p> <table> <tbody> <tr><td>6</td><td>-1.453927000</td><td>0.000981000</td><td>-0.022422000</td></tr> <tr><td>6</td><td>-0.060394000</td><td>0.001240000</td><td>-0.039435000</td></tr> <tr><td>6</td><td>1.202585000</td><td>0.005463000</td><td>-0.162825000</td></tr> <tr><td>6</td><td>-2.689735000</td><td>-0.001965000</td><td>0.058918000</td></tr> <tr><td>1</td><td>-3.763208000</td><td>-0.001339000</td><td>0.042200000</td></tr> <tr><td>1</td><td>3.213730000</td><td>-1.472300000</td><td>0.882001000</td></tr> <tr><td>1</td><td>3.777036000</td><td>-1.896287000</td><td>1.186599000</td></tr> <tr><td>1</td><td>3.558086000</td><td>0.034299000</td><td>-1.474584000</td></tr> <tr><td>1</td><td>4.220759000</td><td>0.043221000</td><td>-1.864005000</td></tr> <tr><td>1</td><td>3.783565000</td><td>1.832738000</td><td>1.273226000</td></tr> <tr><td>1</td><td>3.218863000</td><td>1.425352000</td><td>0.949145000</td></tr> </tbody> </table>    | 6 | -1.453927000 | 0.000981000  | -0.022422000 | 6 | -0.060394000 | 0.001240000  | -0.039435000 | 6 | 1.202585000  | 0.005463000  | -0.162825000 | 6 | -2.689735000 | -0.001965000 | 0.058918000  | 1 | -3.763208000 | -0.001339000 | 0.042200000  | 1 | 3.213730000  | -1.472300000 | 0.882001000  | 1 | 3.777036000  | -1.896287000 | 1.186599000  | 1 | 3.558086000  | 0.034299000 | -1.474584000 | 1 | 4.220759000  | 0.043221000  | -1.864005000 | 1 | 3.783565000  | 1.832738000  | 1.273226000 | 1 | 3.218863000 | 1.425352000 | 0.949145000 |
| 6                                                                                                                                                                                                                                                                                                                                                                                                                                                                                                                                                                                                                                                                                                                                                                                                                                                                                               | -1.225700000 | -0.024560000 | -0.000219000 |              |   |              |              |              |   |              |              |              |   |              |              |              |   |              |              |              |                                                                                                                                                                                                                                                                                                                                                                                                                                                                                                                                                                                                                                                                   |              |             |              |              |              |              |              |             |              |              |             |             |              |              |              |                                                                                                                                                                                                                                                                                                                                                                                                                                                                                                                                                                                                                                                                                                                                                                                                                                                                                                                                                                                                                                                                 |   |              |              |              |   |              |              |              |   |              |              |              |   |              |              |              |   |              |              |              |   |              |              |              |   |              |              |              |   |              |             |              |   |              |              |              |   |              |              |             |   |             |             |             |
| 6                                                                                                                                                                                                                                                                                                                                                                                                                                                                                                                                                                                                                                                                                                                                                                                                                                                                                               | 0.167146000  | -0.062580000 | 0.000024000  |              |   |              |              |              |   |              |              |              |   |              |              |              |   |              |              |              |                                                                                                                                                                                                                                                                                                                                                                                                                                                                                                                                                                                                                                                                   |              |             |              |              |              |              |              |             |              |              |             |             |              |              |              |                                                                                                                                                                                                                                                                                                                                                                                                                                                                                                                                                                                                                                                                                                                                                                                                                                                                                                                                                                                                                                                                 |   |              |              |              |   |              |              |              |   |              |              |              |   |              |              |              |   |              |              |              |   |              |              |              |   |              |              |              |   |              |             |              |   |              |              |              |   |              |              |             |   |             |             |             |
| 6                                                                                                                                                                                                                                                                                                                                                                                                                                                                                                                                                                                                                                                                                                                                                                                                                                                                                               | 1.429513000  | -0.198009000 | 0.000168000  |              |   |              |              |              |   |              |              |              |   |              |              |              |   |              |              |              |                                                                                                                                                                                                                                                                                                                                                                                                                                                                                                                                                                                                                                                                   |              |             |              |              |              |              |              |             |              |              |             |             |              |              |              |                                                                                                                                                                                                                                                                                                                                                                                                                                                                                                                                                                                                                                                                                                                                                                                                                                                                                                                                                                                                                                                                 |   |              |              |              |   |              |              |              |   |              |              |              |   |              |              |              |   |              |              |              |   |              |              |              |   |              |              |              |   |              |             |              |   |              |              |              |   |              |              |             |   |             |             |             |
| 6                                                                                                                                                                                                                                                                                                                                                                                                                                                                                                                                                                                                                                                                                                                                                                                                                                                                                               | -2.460453000 | 0.076510000  | -0.000267000 |              |   |              |              |              |   |              |              |              |   |              |              |              |   |              |              |              |                                                                                                                                                                                                                                                                                                                                                                                                                                                                                                                                                                                                                                                                   |              |             |              |              |              |              |              |             |              |              |             |             |              |              |              |                                                                                                                                                                                                                                                                                                                                                                                                                                                                                                                                                                                                                                                                                                                                                                                                                                                                                                                                                                                                                                                                 |   |              |              |              |   |              |              |              |   |              |              |              |   |              |              |              |   |              |              |              |   |              |              |              |   |              |              |              |   |              |             |              |   |              |              |              |   |              |              |             |   |             |             |             |
| 1                                                                                                                                                                                                                                                                                                                                                                                                                                                                                                                                                                                                                                                                                                                                                                                                                                                                                               | -3.534095000 | 0.072106000  | -0.000128000 |              |   |              |              |              |   |              |              |              |   |              |              |              |   |              |              |              |                                                                                                                                                                                                                                                                                                                                                                                                                                                                                                                                                                                                                                                                   |              |             |              |              |              |              |              |             |              |              |             |             |              |              |              |                                                                                                                                                                                                                                                                                                                                                                                                                                                                                                                                                                                                                                                                                                                                                                                                                                                                                                                                                                                                                                                                 |   |              |              |              |   |              |              |              |   |              |              |              |   |              |              |              |   |              |              |              |   |              |              |              |   |              |              |              |   |              |             |              |   |              |              |              |   |              |              |             |   |             |             |             |
| 1                                                                                                                                                                                                                                                                                                                                                                                                                                                                                                                                                                                                                                                                                                                                                                                                                                                                                               | 3.454413000  | 1.621824000  | 0.000374000  |              |   |              |              |              |   |              |              |              |   |              |              |              |   |              |              |              |                                                                                                                                                                                                                                                                                                                                                                                                                                                                                                                                                                                                                                                                   |              |             |              |              |              |              |              |             |              |              |             |             |              |              |              |                                                                                                                                                                                                                                                                                                                                                                                                                                                                                                                                                                                                                                                                                                                                                                                                                                                                                                                                                                                                                                                                 |   |              |              |              |   |              |              |              |   |              |              |              |   |              |              |              |   |              |              |              |   |              |              |              |   |              |              |              |   |              |             |              |   |              |              |              |   |              |              |             |   |             |             |             |
| 1                                                                                                                                                                                                                                                                                                                                                                                                                                                                                                                                                                                                                                                                                                                                                                                                                                                                                               | 4.009599000  | 2.152988000  | 0.000420000  |              |   |              |              |              |   |              |              |              |   |              |              |              |   |              |              |              |                                                                                                                                                                                                                                                                                                                                                                                                                                                                                                                                                                                                                                                                   |              |             |              |              |              |              |              |             |              |              |             |             |              |              |              |                                                                                                                                                                                                                                                                                                                                                                                                                                                                                                                                                                                                                                                                                                                                                                                                                                                                                                                                                                                                                                                                 |   |              |              |              |   |              |              |              |   |              |              |              |   |              |              |              |   |              |              |              |   |              |              |              |   |              |              |              |   |              |             |              |   |              |              |              |   |              |              |             |   |             |             |             |
| 1                                                                                                                                                                                                                                                                                                                                                                                                                                                                                                                                                                                                                                                                                                                                                                                                                                                                                               | 3.946346000  | -1.154425000 | 0.000502000  |              |   |              |              |              |   |              |              |              |   |              |              |              |   |              |              |              |                                                                                                                                                                                                                                                                                                                                                                                                                                                                                                                                                                                                                                                                   |              |             |              |              |              |              |              |             |              |              |             |             |              |              |              |                                                                                                                                                                                                                                                                                                                                                                                                                                                                                                                                                                                                                                                                                                                                                                                                                                                                                                                                                                                                                                                                 |   |              |              |              |   |              |              |              |   |              |              |              |   |              |              |              |   |              |              |              |   |              |              |              |   |              |              |              |   |              |             |              |   |              |              |              |   |              |              |             |   |             |             |             |
| 1                                                                                                                                                                                                                                                                                                                                                                                                                                                                                                                                                                                                                                                                                                                                                                                                                                                                                               | 4.660699000  | -1.440666000 | 0.000599000  |              |   |              |              |              |   |              |              |              |   |              |              |              |   |              |              |              |                                                                                                                                                                                                                                                                                                                                                                                                                                                                                                                                                                                                                                                                   |              |             |              |              |              |              |              |             |              |              |             |             |              |              |              |                                                                                                                                                                                                                                                                                                                                                                                                                                                                                                                                                                                                                                                                                                                                                                                                                                                                                                                                                                                                                                                                 |   |              |              |              |   |              |              |              |   |              |              |              |   |              |              |              |   |              |              |              |   |              |              |              |   |              |              |              |   |              |             |              |   |              |              |              |   |              |              |             |   |             |             |             |
| 6                                                                                                                                                                                                                                                                                                                                                                                                                                                                                                                                                                                                                                                                                                                                                                                                                                                                                               | -1.453927000 | 0.000981000  | -0.022422000 |              |   |              |              |              |   |              |              |              |   |              |              |              |   |              |              |              |                                                                                                                                                                                                                                                                                                                                                                                                                                                                                                                                                                                                                                                                   |              |             |              |              |              |              |              |             |              |              |             |             |              |              |              |                                                                                                                                                                                                                                                                                                                                                                                                                                                                                                                                                                                                                                                                                                                                                                                                                                                                                                                                                                                                                                                                 |   |              |              |              |   |              |              |              |   |              |              |              |   |              |              |              |   |              |              |              |   |              |              |              |   |              |              |              |   |              |             |              |   |              |              |              |   |              |              |             |   |             |             |             |
| 6                                                                                                                                                                                                                                                                                                                                                                                                                                                                                                                                                                                                                                                                                                                                                                                                                                                                                               | -0.060394000 | 0.001240000  | -0.039435000 |              |   |              |              |              |   |              |              |              |   |              |              |              |   |              |              |              |                                                                                                                                                                                                                                                                                                                                                                                                                                                                                                                                                                                                                                                                   |              |             |              |              |              |              |              |             |              |              |             |             |              |              |              |                                                                                                                                                                                                                                                                                                                                                                                                                                                                                                                                                                                                                                                                                                                                                                                                                                                                                                                                                                                                                                                                 |   |              |              |              |   |              |              |              |   |              |              |              |   |              |              |              |   |              |              |              |   |              |              |              |   |              |              |              |   |              |             |              |   |              |              |              |   |              |              |             |   |             |             |             |
| 6                                                                                                                                                                                                                                                                                                                                                                                                                                                                                                                                                                                                                                                                                                                                                                                                                                                                                               | 1.202585000  | 0.005463000  | -0.162825000 |              |   |              |              |              |   |              |              |              |   |              |              |              |   |              |              |              |                                                                                                                                                                                                                                                                                                                                                                                                                                                                                                                                                                                                                                                                   |              |             |              |              |              |              |              |             |              |              |             |             |              |              |              |                                                                                                                                                                                                                                                                                                                                                                                                                                                                                                                                                                                                                                                                                                                                                                                                                                                                                                                                                                                                                                                                 |   |              |              |              |   |              |              |              |   |              |              |              |   |              |              |              |   |              |              |              |   |              |              |              |   |              |              |              |   |              |             |              |   |              |              |              |   |              |              |             |   |             |             |             |
| 6                                                                                                                                                                                                                                                                                                                                                                                                                                                                                                                                                                                                                                                                                                                                                                                                                                                                                               | -2.689735000 | -0.001965000 | 0.058918000  |              |   |              |              |              |   |              |              |              |   |              |              |              |   |              |              |              |                                                                                                                                                                                                                                                                                                                                                                                                                                                                                                                                                                                                                                                                   |              |             |              |              |              |              |              |             |              |              |             |             |              |              |              |                                                                                                                                                                                                                                                                                                                                                                                                                                                                                                                                                                                                                                                                                                                                                                                                                                                                                                                                                                                                                                                                 |   |              |              |              |   |              |              |              |   |              |              |              |   |              |              |              |   |              |              |              |   |              |              |              |   |              |              |              |   |              |             |              |   |              |              |              |   |              |              |             |   |             |             |             |
| 1                                                                                                                                                                                                                                                                                                                                                                                                                                                                                                                                                                                                                                                                                                                                                                                                                                                                                               | -3.763208000 | -0.001339000 | 0.042200000  |              |   |              |              |              |   |              |              |              |   |              |              |              |   |              |              |              |                                                                                                                                                                                                                                                                                                                                                                                                                                                                                                                                                                                                                                                                   |              |             |              |              |              |              |              |             |              |              |             |             |              |              |              |                                                                                                                                                                                                                                                                                                                                                                                                                                                                                                                                                                                                                                                                                                                                                                                                                                                                                                                                                                                                                                                                 |   |              |              |              |   |              |              |              |   |              |              |              |   |              |              |              |   |              |              |              |   |              |              |              |   |              |              |              |   |              |             |              |   |              |              |              |   |              |              |             |   |             |             |             |
| 1                                                                                                                                                                                                                                                                                                                                                                                                                                                                                                                                                                                                                                                                                                                                                                                                                                                                                               | 3.213730000  | -1.472300000 | 0.882001000  |              |   |              |              |              |   |              |              |              |   |              |              |              |   |              |              |              |                                                                                                                                                                                                                                                                                                                                                                                                                                                                                                                                                                                                                                                                   |              |             |              |              |              |              |              |             |              |              |             |             |              |              |              |                                                                                                                                                                                                                                                                                                                                                                                                                                                                                                                                                                                                                                                                                                                                                                                                                                                                                                                                                                                                                                                                 |   |              |              |              |   |              |              |              |   |              |              |              |   |              |              |              |   |              |              |              |   |              |              |              |   |              |              |              |   |              |             |              |   |              |              |              |   |              |              |             |   |             |             |             |
| 1                                                                                                                                                                                                                                                                                                                                                                                                                                                                                                                                                                                                                                                                                                                                                                                                                                                                                               | 3.777036000  | -1.896287000 | 1.186599000  |              |   |              |              |              |   |              |              |              |   |              |              |              |   |              |              |              |                                                                                                                                                                                                                                                                                                                                                                                                                                                                                                                                                                                                                                                                   |              |             |              |              |              |              |              |             |              |              |             |             |              |              |              |                                                                                                                                                                                                                                                                                                                                                                                                                                                                                                                                                                                                                                                                                                                                                                                                                                                                                                                                                                                                                                                                 |   |              |              |              |   |              |              |              |   |              |              |              |   |              |              |              |   |              |              |              |   |              |              |              |   |              |              |              |   |              |             |              |   |              |              |              |   |              |              |             |   |             |             |             |
| 1                                                                                                                                                                                                                                                                                                                                                                                                                                                                                                                                                                                                                                                                                                                                                                                                                                                                                               | 3.558086000  | 0.034299000  | -1.474584000 |              |   |              |              |              |   |              |              |              |   |              |              |              |   |              |              |              |                                                                                                                                                                                                                                                                                                                                                                                                                                                                                                                                                                                                                                                                   |              |             |              |              |              |              |              |             |              |              |             |             |              |              |              |                                                                                                                                                                                                                                                                                                                                                                                                                                                                                                                                                                                                                                                                                                                                                                                                                                                                                                                                                                                                                                                                 |   |              |              |              |   |              |              |              |   |              |              |              |   |              |              |              |   |              |              |              |   |              |              |              |   |              |              |              |   |              |             |              |   |              |              |              |   |              |              |             |   |             |             |             |
| 1                                                                                                                                                                                                                                                                                                                                                                                                                                                                                                                                                                                                                                                                                                                                                                                                                                                                                               | 4.220759000  | 0.043221000  | -1.864005000 |              |   |              |              |              |   |              |              |              |   |              |              |              |   |              |              |              |                                                                                                                                                                                                                                                                                                                                                                                                                                                                                                                                                                                                                                                                   |              |             |              |              |              |              |              |             |              |              |             |             |              |              |              |                                                                                                                                                                                                                                                                                                                                                                                                                                                                                                                                                                                                                                                                                                                                                                                                                                                                                                                                                                                                                                                                 |   |              |              |              |   |              |              |              |   |              |              |              |   |              |              |              |   |              |              |              |   |              |              |              |   |              |              |              |   |              |             |              |   |              |              |              |   |              |              |             |   |             |             |             |
| 1                                                                                                                                                                                                                                                                                                                                                                                                                                                                                                                                                                                                                                                                                                                                                                                                                                                                                               | 3.783565000  | 1.832738000  | 1.273226000  |              |   |              |              |              |   |              |              |              |   |              |              |              |   |              |              |              |                                                                                                                                                                                                                                                                                                                                                                                                                                                                                                                                                                                                                                                                   |              |             |              |              |              |              |              |             |              |              |             |             |              |              |              |                                                                                                                                                                                                                                                                                                                                                                                                                                                                                                                                                                                                                                                                                                                                                                                                                                                                                                                                                                                                                                                                 |   |              |              |              |   |              |              |              |   |              |              |              |   |              |              |              |   |              |              |              |   |              |              |              |   |              |              |              |   |              |             |              |   |              |              |              |   |              |              |             |   |             |             |             |
| 1                                                                                                                                                                                                                                                                                                                                                                                                                                                                                                                                                                                                                                                                                                                                                                                                                                                                                               | 3.218863000  | 1.425352000  | 0.949145000  |              |   |              |              |              |   |              |              |              |   |              |              |              |   |              |              |              |                                                                                                                                                                                                                                                                                                                                                                                                                                                                                                                                                                                                                                                                   |              |             |              |              |              |              |              |             |              |              |             |             |              |              |              |                                                                                                                                                                                                                                                                                                                                                                                                                                                                                                                                                                                                                                                                                                                                                                                                                                                                                                                                                                                                                                                                 |   |              |              |              |   |              |              |              |   |              |              |              |   |              |              |              |   |              |              |              |   |              |              |              |   |              |              |              |   |              |             |              |   |              |              |              |   |              |              |             |   |             |             |             |
| <p><b>C<sub>6</sub>H<sub>3</sub><sup>-</sup></b></p> <p>CCSD(T) Energy = -229.81803 a. u.</p> <table> <tbody> <tr><td>6</td><td>-3.460474000</td><td>-0.020366000</td><td>-0.001078000</td></tr> <tr><td>6</td><td>-2.226142000</td><td>-0.005262000</td><td>0.003036000</td></tr> <tr><td>6</td><td>-0.842846000</td><td>0.062987000</td><td>-0.001533000</td></tr> <tr><td>1</td><td>-4.533305000</td><td>-0.070024000</td><td>0.000051000</td></tr> <tr><td>6</td><td>0.399492000</td><td>0.000140000</td><td>0.003070000</td></tr> <tr><td>6</td><td>1.778423000</td><td>0.003720000</td><td>-0.002701000</td></tr> <tr><td>6</td><td>3.050793000</td><td>-0.029985000</td><td>-0.003241000</td></tr> <tr><td>1</td><td>5.784526000</td><td>0.000515000</td><td>0.005752000</td></tr> <tr><td>1</td><td>6.553298000</td><td>0.002107000</td><td>0.008875000</td></tr> </tbody> </table>     | 6            | -3.460474000 | -0.020366000 | -0.001078000 | 6 | -2.226142000 | -0.005262000 | 0.003036000  | 6 | -0.842846000 | 0.062987000  | -0.001533000 | 1 | -4.533305000 | -0.070024000 | 0.000051000  | 6 | 0.399492000  | 0.000140000  | 0.003070000  | 6                                                                                                                                                                                                                                                                                                                                                                                                                                                                                                                                                                                                                                                                 | 1.778423000  | 0.003720000 | -0.002701000 | 6            | 3.050793000  | -0.029985000 | -0.003241000 | 1           | 5.784526000  | 0.000515000  | 0.005752000 | 1           | 6.553298000  | 0.002107000  | 0.008875000  | <p><b>C<sub>6</sub>H<sub>5</sub><sup>-</sup></b></p> <p>CCSD(T) Energy = -230.99336 a. u.</p> <table> <tbody> <tr><td>6</td><td>3.707204000</td><td>0.045132000</td><td>0.000906000</td></tr> <tr><td>6</td><td>2.473223000</td><td>0.019482000</td><td>0.001102000</td></tr> <tr><td>6</td><td>1.088358000</td><td>0.043295000</td><td>-0.001201000</td></tr> <tr><td>6</td><td>-0.151017000</td><td>-0.058103000</td><td>-0.000511000</td></tr> <tr><td>6</td><td>-1.529640000</td><td>-0.101717000</td><td>-0.001272000</td></tr> <tr><td>6</td><td>-2.796874000</td><td>-0.212640000</td><td>-0.001940000</td></tr> <tr><td>1</td><td>-5.300315000</td><td>2.263033000</td><td>0.002920000</td></tr> <tr><td>1</td><td>-4.768763000</td><td>1.709701000</td><td>0.001583000</td></tr> <tr><td>1</td><td>-6.091462000</td><td>-1.334369000</td><td>0.005210000</td></tr> <tr><td>1</td><td>-5.367882000</td><td>-1.075443000</td><td>0.005497000</td></tr> <tr><td>1</td><td>4.780898000</td><td>0.024382000</td><td>0.002279000</td></tr> </tbody> </table> | 6 | 3.707204000  | 0.045132000  | 0.000906000  | 6 | 2.473223000  | 0.019482000  | 0.001102000  | 6 | 1.088358000  | 0.043295000  | -0.001201000 | 6 | -0.151017000 | -0.058103000 | -0.000511000 | 6 | -1.529640000 | -0.101717000 | -0.001272000 | 6 | -2.796874000 | -0.212640000 | -0.001940000 | 1 | -5.300315000 | 2.263033000  | 0.002920000  | 1 | -4.768763000 | 1.709701000 | 0.001583000  | 1 | -6.091462000 | -1.334369000 | 0.005210000  | 1 | -5.367882000 | -1.075443000 | 0.005497000 | 1 | 4.780898000 | 0.024382000 | 0.002279000 |
| 6                                                                                                                                                                                                                                                                                                                                                                                                                                                                                                                                                                                                                                                                                                                                                                                                                                                                                               | -3.460474000 | -0.020366000 | -0.001078000 |              |   |              |              |              |   |              |              |              |   |              |              |              |   |              |              |              |                                                                                                                                                                                                                                                                                                                                                                                                                                                                                                                                                                                                                                                                   |              |             |              |              |              |              |              |             |              |              |             |             |              |              |              |                                                                                                                                                                                                                                                                                                                                                                                                                                                                                                                                                                                                                                                                                                                                                                                                                                                                                                                                                                                                                                                                 |   |              |              |              |   |              |              |              |   |              |              |              |   |              |              |              |   |              |              |              |   |              |              |              |   |              |              |              |   |              |             |              |   |              |              |              |   |              |              |             |   |             |             |             |
| 6                                                                                                                                                                                                                                                                                                                                                                                                                                                                                                                                                                                                                                                                                                                                                                                                                                                                                               | -2.226142000 | -0.005262000 | 0.003036000  |              |   |              |              |              |   |              |              |              |   |              |              |              |   |              |              |              |                                                                                                                                                                                                                                                                                                                                                                                                                                                                                                                                                                                                                                                                   |              |             |              |              |              |              |              |             |              |              |             |             |              |              |              |                                                                                                                                                                                                                                                                                                                                                                                                                                                                                                                                                                                                                                                                                                                                                                                                                                                                                                                                                                                                                                                                 |   |              |              |              |   |              |              |              |   |              |              |              |   |              |              |              |   |              |              |              |   |              |              |              |   |              |              |              |   |              |             |              |   |              |              |              |   |              |              |             |   |             |             |             |
| 6                                                                                                                                                                                                                                                                                                                                                                                                                                                                                                                                                                                                                                                                                                                                                                                                                                                                                               | -0.842846000 | 0.062987000  | -0.001533000 |              |   |              |              |              |   |              |              |              |   |              |              |              |   |              |              |              |                                                                                                                                                                                                                                                                                                                                                                                                                                                                                                                                                                                                                                                                   |              |             |              |              |              |              |              |             |              |              |             |             |              |              |              |                                                                                                                                                                                                                                                                                                                                                                                                                                                                                                                                                                                                                                                                                                                                                                                                                                                                                                                                                                                                                                                                 |   |              |              |              |   |              |              |              |   |              |              |              |   |              |              |              |   |              |              |              |   |              |              |              |   |              |              |              |   |              |             |              |   |              |              |              |   |              |              |             |   |             |             |             |
| 1                                                                                                                                                                                                                                                                                                                                                                                                                                                                                                                                                                                                                                                                                                                                                                                                                                                                                               | -4.533305000 | -0.070024000 | 0.000051000  |              |   |              |              |              |   |              |              |              |   |              |              |              |   |              |              |              |                                                                                                                                                                                                                                                                                                                                                                                                                                                                                                                                                                                                                                                                   |              |             |              |              |              |              |              |             |              |              |             |             |              |              |              |                                                                                                                                                                                                                                                                                                                                                                                                                                                                                                                                                                                                                                                                                                                                                                                                                                                                                                                                                                                                                                                                 |   |              |              |              |   |              |              |              |   |              |              |              |   |              |              |              |   |              |              |              |   |              |              |              |   |              |              |              |   |              |             |              |   |              |              |              |   |              |              |             |   |             |             |             |
| 6                                                                                                                                                                                                                                                                                                                                                                                                                                                                                                                                                                                                                                                                                                                                                                                                                                                                                               | 0.399492000  | 0.000140000  | 0.003070000  |              |   |              |              |              |   |              |              |              |   |              |              |              |   |              |              |              |                                                                                                                                                                                                                                                                                                                                                                                                                                                                                                                                                                                                                                                                   |              |             |              |              |              |              |              |             |              |              |             |             |              |              |              |                                                                                                                                                                                                                                                                                                                                                                                                                                                                                                                                                                                                                                                                                                                                                                                                                                                                                                                                                                                                                                                                 |   |              |              |              |   |              |              |              |   |              |              |              |   |              |              |              |   |              |              |              |   |              |              |              |   |              |              |              |   |              |             |              |   |              |              |              |   |              |              |             |   |             |             |             |
| 6                                                                                                                                                                                                                                                                                                                                                                                                                                                                                                                                                                                                                                                                                                                                                                                                                                                                                               | 1.778423000  | 0.003720000  | -0.002701000 |              |   |              |              |              |   |              |              |              |   |              |              |              |   |              |              |              |                                                                                                                                                                                                                                                                                                                                                                                                                                                                                                                                                                                                                                                                   |              |             |              |              |              |              |              |             |              |              |             |             |              |              |              |                                                                                                                                                                                                                                                                                                                                                                                                                                                                                                                                                                                                                                                                                                                                                                                                                                                                                                                                                                                                                                                                 |   |              |              |              |   |              |              |              |   |              |              |              |   |              |              |              |   |              |              |              |   |              |              |              |   |              |              |              |   |              |             |              |   |              |              |              |   |              |              |             |   |             |             |             |
| 6                                                                                                                                                                                                                                                                                                                                                                                                                                                                                                                                                                                                                                                                                                                                                                                                                                                                                               | 3.050793000  | -0.029985000 | -0.003241000 |              |   |              |              |              |   |              |              |              |   |              |              |              |   |              |              |              |                                                                                                                                                                                                                                                                                                                                                                                                                                                                                                                                                                                                                                                                   |              |             |              |              |              |              |              |             |              |              |             |             |              |              |              |                                                                                                                                                                                                                                                                                                                                                                                                                                                                                                                                                                                                                                                                                                                                                                                                                                                                                                                                                                                                                                                                 |   |              |              |              |   |              |              |              |   |              |              |              |   |              |              |              |   |              |              |              |   |              |              |              |   |              |              |              |   |              |             |              |   |              |              |              |   |              |              |             |   |             |             |             |
| 1                                                                                                                                                                                                                                                                                                                                                                                                                                                                                                                                                                                                                                                                                                                                                                                                                                                                                               | 5.784526000  | 0.000515000  | 0.005752000  |              |   |              |              |              |   |              |              |              |   |              |              |              |   |              |              |              |                                                                                                                                                                                                                                                                                                                                                                                                                                                                                                                                                                                                                                                                   |              |             |              |              |              |              |              |             |              |              |             |             |              |              |              |                                                                                                                                                                                                                                                                                                                                                                                                                                                                                                                                                                                                                                                                                                                                                                                                                                                                                                                                                                                                                                                                 |   |              |              |              |   |              |              |              |   |              |              |              |   |              |              |              |   |              |              |              |   |              |              |              |   |              |              |              |   |              |             |              |   |              |              |              |   |              |              |             |   |             |             |             |
| 1                                                                                                                                                                                                                                                                                                                                                                                                                                                                                                                                                                                                                                                                                                                                                                                                                                                                                               | 6.553298000  | 0.002107000  | 0.008875000  |              |   |              |              |              |   |              |              |              |   |              |              |              |   |              |              |              |                                                                                                                                                                                                                                                                                                                                                                                                                                                                                                                                                                                                                                                                   |              |             |              |              |              |              |              |             |              |              |             |             |              |              |              |                                                                                                                                                                                                                                                                                                                                                                                                                                                                                                                                                                                                                                                                                                                                                                                                                                                                                                                                                                                                                                                                 |   |              |              |              |   |              |              |              |   |              |              |              |   |              |              |              |   |              |              |              |   |              |              |              |   |              |              |              |   |              |             |              |   |              |              |              |   |              |              |             |   |             |             |             |
| 6                                                                                                                                                                                                                                                                                                                                                                                                                                                                                                                                                                                                                                                                                                                                                                                                                                                                                               | 3.707204000  | 0.045132000  | 0.000906000  |              |   |              |              |              |   |              |              |              |   |              |              |              |   |              |              |              |                                                                                                                                                                                                                                                                                                                                                                                                                                                                                                                                                                                                                                                                   |              |             |              |              |              |              |              |             |              |              |             |             |              |              |              |                                                                                                                                                                                                                                                                                                                                                                                                                                                                                                                                                                                                                                                                                                                                                                                                                                                                                                                                                                                                                                                                 |   |              |              |              |   |              |              |              |   |              |              |              |   |              |              |              |   |              |              |              |   |              |              |              |   |              |              |              |   |              |             |              |   |              |              |              |   |              |              |             |   |             |             |             |
| 6                                                                                                                                                                                                                                                                                                                                                                                                                                                                                                                                                                                                                                                                                                                                                                                                                                                                                               | 2.473223000  | 0.019482000  | 0.001102000  |              |   |              |              |              |   |              |              |              |   |              |              |              |   |              |              |              |                                                                                                                                                                                                                                                                                                                                                                                                                                                                                                                                                                                                                                                                   |              |             |              |              |              |              |              |             |              |              |             |             |              |              |              |                                                                                                                                                                                                                                                                                                                                                                                                                                                                                                                                                                                                                                                                                                                                                                                                                                                                                                                                                                                                                                                                 |   |              |              |              |   |              |              |              |   |              |              |              |   |              |              |              |   |              |              |              |   |              |              |              |   |              |              |              |   |              |             |              |   |              |              |              |   |              |              |             |   |             |             |             |
| 6                                                                                                                                                                                                                                                                                                                                                                                                                                                                                                                                                                                                                                                                                                                                                                                                                                                                                               | 1.088358000  | 0.043295000  | -0.001201000 |              |   |              |              |              |   |              |              |              |   |              |              |              |   |              |              |              |                                                                                                                                                                                                                                                                                                                                                                                                                                                                                                                                                                                                                                                                   |              |             |              |              |              |              |              |             |              |              |             |             |              |              |              |                                                                                                                                                                                                                                                                                                                                                                                                                                                                                                                                                                                                                                                                                                                                                                                                                                                                                                                                                                                                                                                                 |   |              |              |              |   |              |              |              |   |              |              |              |   |              |              |              |   |              |              |              |   |              |              |              |   |              |              |              |   |              |             |              |   |              |              |              |   |              |              |             |   |             |             |             |
| 6                                                                                                                                                                                                                                                                                                                                                                                                                                                                                                                                                                                                                                                                                                                                                                                                                                                                                               | -0.151017000 | -0.058103000 | -0.000511000 |              |   |              |              |              |   |              |              |              |   |              |              |              |   |              |              |              |                                                                                                                                                                                                                                                                                                                                                                                                                                                                                                                                                                                                                                                                   |              |             |              |              |              |              |              |             |              |              |             |             |              |              |              |                                                                                                                                                                                                                                                                                                                                                                                                                                                                                                                                                                                                                                                                                                                                                                                                                                                                                                                                                                                                                                                                 |   |              |              |              |   |              |              |              |   |              |              |              |   |              |              |              |   |              |              |              |   |              |              |              |   |              |              |              |   |              |             |              |   |              |              |              |   |              |              |             |   |             |             |             |
| 6                                                                                                                                                                                                                                                                                                                                                                                                                                                                                                                                                                                                                                                                                                                                                                                                                                                                                               | -1.529640000 | -0.101717000 | -0.001272000 |              |   |              |              |              |   |              |              |              |   |              |              |              |   |              |              |              |                                                                                                                                                                                                                                                                                                                                                                                                                                                                                                                                                                                                                                                                   |              |             |              |              |              |              |              |             |              |              |             |             |              |              |              |                                                                                                                                                                                                                                                                                                                                                                                                                                                                                                                                                                                                                                                                                                                                                                                                                                                                                                                                                                                                                                                                 |   |              |              |              |   |              |              |              |   |              |              |              |   |              |              |              |   |              |              |              |   |              |              |              |   |              |              |              |   |              |             |              |   |              |              |              |   |              |              |             |   |             |             |             |
| 6                                                                                                                                                                                                                                                                                                                                                                                                                                                                                                                                                                                                                                                                                                                                                                                                                                                                                               | -2.796874000 | -0.212640000 | -0.001940000 |              |   |              |              |              |   |              |              |              |   |              |              |              |   |              |              |              |                                                                                                                                                                                                                                                                                                                                                                                                                                                                                                                                                                                                                                                                   |              |             |              |              |              |              |              |             |              |              |             |             |              |              |              |                                                                                                                                                                                                                                                                                                                                                                                                                                                                                                                                                                                                                                                                                                                                                                                                                                                                                                                                                                                                                                                                 |   |              |              |              |   |              |              |              |   |              |              |              |   |              |              |              |   |              |              |              |   |              |              |              |   |              |              |              |   |              |             |              |   |              |              |              |   |              |              |             |   |             |             |             |
| 1                                                                                                                                                                                                                                                                                                                                                                                                                                                                                                                                                                                                                                                                                                                                                                                                                                                                                               | -5.300315000 | 2.263033000  | 0.002920000  |              |   |              |              |              |   |              |              |              |   |              |              |              |   |              |              |              |                                                                                                                                                                                                                                                                                                                                                                                                                                                                                                                                                                                                                                                                   |              |             |              |              |              |              |              |             |              |              |             |             |              |              |              |                                                                                                                                                                                                                                                                                                                                                                                                                                                                                                                                                                                                                                                                                                                                                                                                                                                                                                                                                                                                                                                                 |   |              |              |              |   |              |              |              |   |              |              |              |   |              |              |              |   |              |              |              |   |              |              |              |   |              |              |              |   |              |             |              |   |              |              |              |   |              |              |             |   |             |             |             |
| 1                                                                                                                                                                                                                                                                                                                                                                                                                                                                                                                                                                                                                                                                                                                                                                                                                                                                                               | -4.768763000 | 1.709701000  | 0.001583000  |              |   |              |              |              |   |              |              |              |   |              |              |              |   |              |              |              |                                                                                                                                                                                                                                                                                                                                                                                                                                                                                                                                                                                                                                                                   |              |             |              |              |              |              |              |             |              |              |             |             |              |              |              |                                                                                                                                                                                                                                                                                                                                                                                                                                                                                                                                                                                                                                                                                                                                                                                                                                                                                                                                                                                                                                                                 |   |              |              |              |   |              |              |              |   |              |              |              |   |              |              |              |   |              |              |              |   |              |              |              |   |              |              |              |   |              |             |              |   |              |              |              |   |              |              |             |   |             |             |             |
| 1                                                                                                                                                                                                                                                                                                                                                                                                                                                                                                                                                                                                                                                                                                                                                                                                                                                                                               | -6.091462000 | -1.334369000 | 0.005210000  |              |   |              |              |              |   |              |              |              |   |              |              |              |   |              |              |              |                                                                                                                                                                                                                                                                                                                                                                                                                                                                                                                                                                                                                                                                   |              |             |              |              |              |              |              |             |              |              |             |             |              |              |              |                                                                                                                                                                                                                                                                                                                                                                                                                                                                                                                                                                                                                                                                                                                                                                                                                                                                                                                                                                                                                                                                 |   |              |              |              |   |              |              |              |   |              |              |              |   |              |              |              |   |              |              |              |   |              |              |              |   |              |              |              |   |              |             |              |   |              |              |              |   |              |              |             |   |             |             |             |
| 1                                                                                                                                                                                                                                                                                                                                                                                                                                                                                                                                                                                                                                                                                                                                                                                                                                                                                               | -5.367882000 | -1.075443000 | 0.005497000  |              |   |              |              |              |   |              |              |              |   |              |              |              |   |              |              |              |                                                                                                                                                                                                                                                                                                                                                                                                                                                                                                                                                                                                                                                                   |              |             |              |              |              |              |              |             |              |              |             |             |              |              |              |                                                                                                                                                                                                                                                                                                                                                                                                                                                                                                                                                                                                                                                                                                                                                                                                                                                                                                                                                                                                                                                                 |   |              |              |              |   |              |              |              |   |              |              |              |   |              |              |              |   |              |              |              |   |              |              |              |   |              |              |              |   |              |             |              |   |              |              |              |   |              |              |             |   |             |             |             |
| 1                                                                                                                                                                                                                                                                                                                                                                                                                                                                                                                                                                                                                                                                                                                                                                                                                                                                                               | 4.780898000  | 0.024382000  | 0.002279000  |              |   |              |              |              |   |              |              |              |   |              |              |              |   |              |              |              |                                                                                                                                                                                                                                                                                                                                                                                                                                                                                                                                                                                                                                                                   |              |             |              |              |              |              |              |             |              |              |             |             |              |              |              |                                                                                                                                                                                                                                                                                                                                                                                                                                                                                                                                                                                                                                                                                                                                                                                                                                                                                                                                                                                                                                                                 |   |              |              |              |   |              |              |              |   |              |              |              |   |              |              |              |   |              |              |              |   |              |              |              |   |              |              |              |   |              |             |              |   |              |              |              |   |              |              |             |   |             |             |             |

|                                                                                                                                                                                                                                                                                                                                                                                                                                                                                                                                                                                                                                                                                                                                                                                                                                                                                                                                                                                                                                                                                                                                                                                                                                                    |              |              |              |              |   |              |              |              |   |              |              |              |   |             |              |              |   |              |              |              |   |              |              |             |   |              |              |              |   |              |              |              |                                                                                                                                                                                                                                                                                                                                                                                                                                                                                                                                                                                                                                                                                                                                                                                                                                                                                                                                                                                          |              |              |              |              |              |              |              |              |              |             |              |              |              |              |              |              |             |              |              |                                                                                                                                                                                                                                                                                                                                                                                                                                                                                                                                                                                                                                                |   |              |              |              |   |              |             |             |   |              |             |             |   |              |              |              |   |              |              |              |   |             |             |              |
|----------------------------------------------------------------------------------------------------------------------------------------------------------------------------------------------------------------------------------------------------------------------------------------------------------------------------------------------------------------------------------------------------------------------------------------------------------------------------------------------------------------------------------------------------------------------------------------------------------------------------------------------------------------------------------------------------------------------------------------------------------------------------------------------------------------------------------------------------------------------------------------------------------------------------------------------------------------------------------------------------------------------------------------------------------------------------------------------------------------------------------------------------------------------------------------------------------------------------------------------------|--------------|--------------|--------------|--------------|---|--------------|--------------|--------------|---|--------------|--------------|--------------|---|-------------|--------------|--------------|---|--------------|--------------|--------------|---|--------------|--------------|-------------|---|--------------|--------------|--------------|---|--------------|--------------|--------------|------------------------------------------------------------------------------------------------------------------------------------------------------------------------------------------------------------------------------------------------------------------------------------------------------------------------------------------------------------------------------------------------------------------------------------------------------------------------------------------------------------------------------------------------------------------------------------------------------------------------------------------------------------------------------------------------------------------------------------------------------------------------------------------------------------------------------------------------------------------------------------------------------------------------------------------------------------------------------------------|--------------|--------------|--------------|--------------|--------------|--------------|--------------|--------------|--------------|-------------|--------------|--------------|--------------|--------------|--------------|--------------|-------------|--------------|--------------|------------------------------------------------------------------------------------------------------------------------------------------------------------------------------------------------------------------------------------------------------------------------------------------------------------------------------------------------------------------------------------------------------------------------------------------------------------------------------------------------------------------------------------------------------------------------------------------------------------------------------------------------|---|--------------|--------------|--------------|---|--------------|-------------|-------------|---|--------------|-------------|-------------|---|--------------|--------------|--------------|---|--------------|--------------|--------------|---|-------------|-------------|--------------|
| <p><b>C<sub>6</sub>H<sub>7</sub><sup>-</sup></b></p> <p>CCSD(T) Energy = -232.16884 a. u.</p> <table border="1"> <tbody> <tr><td>6</td><td>3.936395000</td><td>0.034238000</td><td>-0.028435000</td></tr> <tr><td>6</td><td>2.702766000</td><td>0.015173000</td><td>-0.014771000</td></tr> <tr><td>6</td><td>1.318826000</td><td>-0.034420000</td><td>-0.040697000</td></tr> <tr><td>6</td><td>0.078685000</td><td>-0.030064000</td><td>0.042490000</td></tr> <tr><td>6</td><td>-1.300470000</td><td>-0.044699000</td><td>0.071032000</td></tr> <tr><td>6</td><td>-2.567889000</td><td>-0.057824000</td><td>0.170056000</td></tr> <tr><td>1</td><td>-4.972683000</td><td>-0.185226000</td><td>1.425215000</td></tr> <tr><td>1</td><td>-5.644758000</td><td>-0.222256000</td><td>1.793561000</td></tr> <tr><td>1</td><td>-5.211784000</td><td>-1.563360000</td><td>-1.584018000</td></tr> <tr><td>1</td><td>-4.643720000</td><td>-1.233719000</td><td>-1.189290000</td></tr> <tr><td>1</td><td>-5.037583000</td><td>2.165193000</td><td>-0.942305000</td></tr> <tr><td>1</td><td>-4.508508000</td><td>1.669922000</td><td>-0.691987000</td></tr> <tr><td>1</td><td>5.009159000</td><td>0.075019000</td><td>-0.009233000</td></tr> </tbody> </table> | 6            | 3.936395000  | 0.034238000  | -0.028435000 | 6 | 2.702766000  | 0.015173000  | -0.014771000 | 6 | 1.318826000  | -0.034420000 | -0.040697000 | 6 | 0.078685000 | -0.030064000 | 0.042490000  | 6 | -1.300470000 | -0.044699000 | 0.071032000  | 6 | -2.567889000 | -0.057824000 | 0.170056000 | 1 | -4.972683000 | -0.185226000 | 1.425215000  | 1 | -5.644758000 | -0.222256000 | 1.793561000  | 1                                                                                                                                                                                                                                                                                                                                                                                                                                                                                                                                                                                                                                                                                                                                                                                                                                                                                                                                                                                        | -5.211784000 | -1.563360000 | -1.584018000 | 1            | -4.643720000 | -1.233719000 | -1.189290000 | 1            | -5.037583000 | 2.165193000 | -0.942305000 | 1            | -4.508508000 | 1.669922000  | -0.691987000 | 1            | 5.009159000 | 0.075019000  | -0.009233000 | <p><b>C<sub>4</sub>H<sub>2</sub><sup>-</sup></b></p> <p>CCSD(T) Energy = -153.04727 a. u.</p> <table border="1"> <tbody> <tr><td>6</td><td>0.000000000</td><td>0.000000000</td><td>-0.334962000</td></tr> <tr><td>6</td><td>0.000000000</td><td>0.000000000</td><td>1.087917000</td></tr> <tr><td>6</td><td>0.000000000</td><td>0.000000000</td><td>2.362514000</td></tr> <tr><td>6</td><td>0.000000000</td><td>0.000000000</td><td>-1.609261000</td></tr> <tr><td>1</td><td>0.000000000</td><td>0.000000000</td><td>-4.909582000</td></tr> <tr><td>1</td><td>0.000000000</td><td>0.000000000</td><td>-4.127668000</td></tr> </tbody> </table> | 6 | 0.000000000  | 0.000000000  | -0.334962000 | 6 | 0.000000000  | 0.000000000 | 1.087917000 | 6 | 0.000000000  | 0.000000000 | 2.362514000 | 6 | 0.000000000  | 0.000000000  | -1.609261000 | 1 | 0.000000000  | 0.000000000  | -4.909582000 | 1 | 0.000000000 | 0.000000000 | -4.127668000 |
| 6                                                                                                                                                                                                                                                                                                                                                                                                                                                                                                                                                                                                                                                                                                                                                                                                                                                                                                                                                                                                                                                                                                                                                                                                                                                  | 3.936395000  | 0.034238000  | -0.028435000 |              |   |              |              |              |   |              |              |              |   |             |              |              |   |              |              |              |   |              |              |             |   |              |              |              |   |              |              |              |                                                                                                                                                                                                                                                                                                                                                                                                                                                                                                                                                                                                                                                                                                                                                                                                                                                                                                                                                                                          |              |              |              |              |              |              |              |              |              |             |              |              |              |              |              |              |             |              |              |                                                                                                                                                                                                                                                                                                                                                                                                                                                                                                                                                                                                                                                |   |              |              |              |   |              |             |             |   |              |             |             |   |              |              |              |   |              |              |              |   |             |             |              |
| 6                                                                                                                                                                                                                                                                                                                                                                                                                                                                                                                                                                                                                                                                                                                                                                                                                                                                                                                                                                                                                                                                                                                                                                                                                                                  | 2.702766000  | 0.015173000  | -0.014771000 |              |   |              |              |              |   |              |              |              |   |             |              |              |   |              |              |              |   |              |              |             |   |              |              |              |   |              |              |              |                                                                                                                                                                                                                                                                                                                                                                                                                                                                                                                                                                                                                                                                                                                                                                                                                                                                                                                                                                                          |              |              |              |              |              |              |              |              |              |             |              |              |              |              |              |              |             |              |              |                                                                                                                                                                                                                                                                                                                                                                                                                                                                                                                                                                                                                                                |   |              |              |              |   |              |             |             |   |              |             |             |   |              |              |              |   |              |              |              |   |             |             |              |
| 6                                                                                                                                                                                                                                                                                                                                                                                                                                                                                                                                                                                                                                                                                                                                                                                                                                                                                                                                                                                                                                                                                                                                                                                                                                                  | 1.318826000  | -0.034420000 | -0.040697000 |              |   |              |              |              |   |              |              |              |   |             |              |              |   |              |              |              |   |              |              |             |   |              |              |              |   |              |              |              |                                                                                                                                                                                                                                                                                                                                                                                                                                                                                                                                                                                                                                                                                                                                                                                                                                                                                                                                                                                          |              |              |              |              |              |              |              |              |              |             |              |              |              |              |              |              |             |              |              |                                                                                                                                                                                                                                                                                                                                                                                                                                                                                                                                                                                                                                                |   |              |              |              |   |              |             |             |   |              |             |             |   |              |              |              |   |              |              |              |   |             |             |              |
| 6                                                                                                                                                                                                                                                                                                                                                                                                                                                                                                                                                                                                                                                                                                                                                                                                                                                                                                                                                                                                                                                                                                                                                                                                                                                  | 0.078685000  | -0.030064000 | 0.042490000  |              |   |              |              |              |   |              |              |              |   |             |              |              |   |              |              |              |   |              |              |             |   |              |              |              |   |              |              |              |                                                                                                                                                                                                                                                                                                                                                                                                                                                                                                                                                                                                                                                                                                                                                                                                                                                                                                                                                                                          |              |              |              |              |              |              |              |              |              |             |              |              |              |              |              |              |             |              |              |                                                                                                                                                                                                                                                                                                                                                                                                                                                                                                                                                                                                                                                |   |              |              |              |   |              |             |             |   |              |             |             |   |              |              |              |   |              |              |              |   |             |             |              |
| 6                                                                                                                                                                                                                                                                                                                                                                                                                                                                                                                                                                                                                                                                                                                                                                                                                                                                                                                                                                                                                                                                                                                                                                                                                                                  | -1.300470000 | -0.044699000 | 0.071032000  |              |   |              |              |              |   |              |              |              |   |             |              |              |   |              |              |              |   |              |              |             |   |              |              |              |   |              |              |              |                                                                                                                                                                                                                                                                                                                                                                                                                                                                                                                                                                                                                                                                                                                                                                                                                                                                                                                                                                                          |              |              |              |              |              |              |              |              |              |             |              |              |              |              |              |              |             |              |              |                                                                                                                                                                                                                                                                                                                                                                                                                                                                                                                                                                                                                                                |   |              |              |              |   |              |             |             |   |              |             |             |   |              |              |              |   |              |              |              |   |             |             |              |
| 6                                                                                                                                                                                                                                                                                                                                                                                                                                                                                                                                                                                                                                                                                                                                                                                                                                                                                                                                                                                                                                                                                                                                                                                                                                                  | -2.567889000 | -0.057824000 | 0.170056000  |              |   |              |              |              |   |              |              |              |   |             |              |              |   |              |              |              |   |              |              |             |   |              |              |              |   |              |              |              |                                                                                                                                                                                                                                                                                                                                                                                                                                                                                                                                                                                                                                                                                                                                                                                                                                                                                                                                                                                          |              |              |              |              |              |              |              |              |              |             |              |              |              |              |              |              |             |              |              |                                                                                                                                                                                                                                                                                                                                                                                                                                                                                                                                                                                                                                                |   |              |              |              |   |              |             |             |   |              |             |             |   |              |              |              |   |              |              |              |   |             |             |              |
| 1                                                                                                                                                                                                                                                                                                                                                                                                                                                                                                                                                                                                                                                                                                                                                                                                                                                                                                                                                                                                                                                                                                                                                                                                                                                  | -4.972683000 | -0.185226000 | 1.425215000  |              |   |              |              |              |   |              |              |              |   |             |              |              |   |              |              |              |   |              |              |             |   |              |              |              |   |              |              |              |                                                                                                                                                                                                                                                                                                                                                                                                                                                                                                                                                                                                                                                                                                                                                                                                                                                                                                                                                                                          |              |              |              |              |              |              |              |              |              |             |              |              |              |              |              |              |             |              |              |                                                                                                                                                                                                                                                                                                                                                                                                                                                                                                                                                                                                                                                |   |              |              |              |   |              |             |             |   |              |             |             |   |              |              |              |   |              |              |              |   |             |             |              |
| 1                                                                                                                                                                                                                                                                                                                                                                                                                                                                                                                                                                                                                                                                                                                                                                                                                                                                                                                                                                                                                                                                                                                                                                                                                                                  | -5.644758000 | -0.222256000 | 1.793561000  |              |   |              |              |              |   |              |              |              |   |             |              |              |   |              |              |              |   |              |              |             |   |              |              |              |   |              |              |              |                                                                                                                                                                                                                                                                                                                                                                                                                                                                                                                                                                                                                                                                                                                                                                                                                                                                                                                                                                                          |              |              |              |              |              |              |              |              |              |             |              |              |              |              |              |              |             |              |              |                                                                                                                                                                                                                                                                                                                                                                                                                                                                                                                                                                                                                                                |   |              |              |              |   |              |             |             |   |              |             |             |   |              |              |              |   |              |              |              |   |             |             |              |
| 1                                                                                                                                                                                                                                                                                                                                                                                                                                                                                                                                                                                                                                                                                                                                                                                                                                                                                                                                                                                                                                                                                                                                                                                                                                                  | -5.211784000 | -1.563360000 | -1.584018000 |              |   |              |              |              |   |              |              |              |   |             |              |              |   |              |              |              |   |              |              |             |   |              |              |              |   |              |              |              |                                                                                                                                                                                                                                                                                                                                                                                                                                                                                                                                                                                                                                                                                                                                                                                                                                                                                                                                                                                          |              |              |              |              |              |              |              |              |              |             |              |              |              |              |              |              |             |              |              |                                                                                                                                                                                                                                                                                                                                                                                                                                                                                                                                                                                                                                                |   |              |              |              |   |              |             |             |   |              |             |             |   |              |              |              |   |              |              |              |   |             |             |              |
| 1                                                                                                                                                                                                                                                                                                                                                                                                                                                                                                                                                                                                                                                                                                                                                                                                                                                                                                                                                                                                                                                                                                                                                                                                                                                  | -4.643720000 | -1.233719000 | -1.189290000 |              |   |              |              |              |   |              |              |              |   |             |              |              |   |              |              |              |   |              |              |             |   |              |              |              |   |              |              |              |                                                                                                                                                                                                                                                                                                                                                                                                                                                                                                                                                                                                                                                                                                                                                                                                                                                                                                                                                                                          |              |              |              |              |              |              |              |              |              |             |              |              |              |              |              |              |             |              |              |                                                                                                                                                                                                                                                                                                                                                                                                                                                                                                                                                                                                                                                |   |              |              |              |   |              |             |             |   |              |             |             |   |              |              |              |   |              |              |              |   |             |             |              |
| 1                                                                                                                                                                                                                                                                                                                                                                                                                                                                                                                                                                                                                                                                                                                                                                                                                                                                                                                                                                                                                                                                                                                                                                                                                                                  | -5.037583000 | 2.165193000  | -0.942305000 |              |   |              |              |              |   |              |              |              |   |             |              |              |   |              |              |              |   |              |              |             |   |              |              |              |   |              |              |              |                                                                                                                                                                                                                                                                                                                                                                                                                                                                                                                                                                                                                                                                                                                                                                                                                                                                                                                                                                                          |              |              |              |              |              |              |              |              |              |             |              |              |              |              |              |              |             |              |              |                                                                                                                                                                                                                                                                                                                                                                                                                                                                                                                                                                                                                                                |   |              |              |              |   |              |             |             |   |              |             |             |   |              |              |              |   |              |              |              |   |             |             |              |
| 1                                                                                                                                                                                                                                                                                                                                                                                                                                                                                                                                                                                                                                                                                                                                                                                                                                                                                                                                                                                                                                                                                                                                                                                                                                                  | -4.508508000 | 1.669922000  | -0.691987000 |              |   |              |              |              |   |              |              |              |   |             |              |              |   |              |              |              |   |              |              |             |   |              |              |              |   |              |              |              |                                                                                                                                                                                                                                                                                                                                                                                                                                                                                                                                                                                                                                                                                                                                                                                                                                                                                                                                                                                          |              |              |              |              |              |              |              |              |              |             |              |              |              |              |              |              |             |              |              |                                                                                                                                                                                                                                                                                                                                                                                                                                                                                                                                                                                                                                                |   |              |              |              |   |              |             |             |   |              |             |             |   |              |              |              |   |              |              |              |   |             |             |              |
| 1                                                                                                                                                                                                                                                                                                                                                                                                                                                                                                                                                                                                                                                                                                                                                                                                                                                                                                                                                                                                                                                                                                                                                                                                                                                  | 5.009159000  | 0.075019000  | -0.009233000 |              |   |              |              |              |   |              |              |              |   |             |              |              |   |              |              |              |   |              |              |             |   |              |              |              |   |              |              |              |                                                                                                                                                                                                                                                                                                                                                                                                                                                                                                                                                                                                                                                                                                                                                                                                                                                                                                                                                                                          |              |              |              |              |              |              |              |              |              |             |              |              |              |              |              |              |             |              |              |                                                                                                                                                                                                                                                                                                                                                                                                                                                                                                                                                                                                                                                |   |              |              |              |   |              |             |             |   |              |             |             |   |              |              |              |   |              |              |              |   |             |             |              |
| 6                                                                                                                                                                                                                                                                                                                                                                                                                                                                                                                                                                                                                                                                                                                                                                                                                                                                                                                                                                                                                                                                                                                                                                                                                                                  | 0.000000000  | 0.000000000  | -0.334962000 |              |   |              |              |              |   |              |              |              |   |             |              |              |   |              |              |              |   |              |              |             |   |              |              |              |   |              |              |              |                                                                                                                                                                                                                                                                                                                                                                                                                                                                                                                                                                                                                                                                                                                                                                                                                                                                                                                                                                                          |              |              |              |              |              |              |              |              |              |             |              |              |              |              |              |              |             |              |              |                                                                                                                                                                                                                                                                                                                                                                                                                                                                                                                                                                                                                                                |   |              |              |              |   |              |             |             |   |              |             |             |   |              |              |              |   |              |              |              |   |             |             |              |
| 6                                                                                                                                                                                                                                                                                                                                                                                                                                                                                                                                                                                                                                                                                                                                                                                                                                                                                                                                                                                                                                                                                                                                                                                                                                                  | 0.000000000  | 0.000000000  | 1.087917000  |              |   |              |              |              |   |              |              |              |   |             |              |              |   |              |              |              |   |              |              |             |   |              |              |              |   |              |              |              |                                                                                                                                                                                                                                                                                                                                                                                                                                                                                                                                                                                                                                                                                                                                                                                                                                                                                                                                                                                          |              |              |              |              |              |              |              |              |              |             |              |              |              |              |              |              |             |              |              |                                                                                                                                                                                                                                                                                                                                                                                                                                                                                                                                                                                                                                                |   |              |              |              |   |              |             |             |   |              |             |             |   |              |              |              |   |              |              |              |   |             |             |              |
| 6                                                                                                                                                                                                                                                                                                                                                                                                                                                                                                                                                                                                                                                                                                                                                                                                                                                                                                                                                                                                                                                                                                                                                                                                                                                  | 0.000000000  | 0.000000000  | 2.362514000  |              |   |              |              |              |   |              |              |              |   |             |              |              |   |              |              |              |   |              |              |             |   |              |              |              |   |              |              |              |                                                                                                                                                                                                                                                                                                                                                                                                                                                                                                                                                                                                                                                                                                                                                                                                                                                                                                                                                                                          |              |              |              |              |              |              |              |              |              |             |              |              |              |              |              |              |             |              |              |                                                                                                                                                                                                                                                                                                                                                                                                                                                                                                                                                                                                                                                |   |              |              |              |   |              |             |             |   |              |             |             |   |              |              |              |   |              |              |              |   |             |             |              |
| 6                                                                                                                                                                                                                                                                                                                                                                                                                                                                                                                                                                                                                                                                                                                                                                                                                                                                                                                                                                                                                                                                                                                                                                                                                                                  | 0.000000000  | 0.000000000  | -1.609261000 |              |   |              |              |              |   |              |              |              |   |             |              |              |   |              |              |              |   |              |              |             |   |              |              |              |   |              |              |              |                                                                                                                                                                                                                                                                                                                                                                                                                                                                                                                                                                                                                                                                                                                                                                                                                                                                                                                                                                                          |              |              |              |              |              |              |              |              |              |             |              |              |              |              |              |              |             |              |              |                                                                                                                                                                                                                                                                                                                                                                                                                                                                                                                                                                                                                                                |   |              |              |              |   |              |             |             |   |              |             |             |   |              |              |              |   |              |              |              |   |             |             |              |
| 1                                                                                                                                                                                                                                                                                                                                                                                                                                                                                                                                                                                                                                                                                                                                                                                                                                                                                                                                                                                                                                                                                                                                                                                                                                                  | 0.000000000  | 0.000000000  | -4.909582000 |              |   |              |              |              |   |              |              |              |   |             |              |              |   |              |              |              |   |              |              |             |   |              |              |              |   |              |              |              |                                                                                                                                                                                                                                                                                                                                                                                                                                                                                                                                                                                                                                                                                                                                                                                                                                                                                                                                                                                          |              |              |              |              |              |              |              |              |              |             |              |              |              |              |              |              |             |              |              |                                                                                                                                                                                                                                                                                                                                                                                                                                                                                                                                                                                                                                                |   |              |              |              |   |              |             |             |   |              |             |             |   |              |              |              |   |              |              |              |   |             |             |              |
| 1                                                                                                                                                                                                                                                                                                                                                                                                                                                                                                                                                                                                                                                                                                                                                                                                                                                                                                                                                                                                                                                                                                                                                                                                                                                  | 0.000000000  | 0.000000000  | -4.127668000 |              |   |              |              |              |   |              |              |              |   |             |              |              |   |              |              |              |   |              |              |             |   |              |              |              |   |              |              |              |                                                                                                                                                                                                                                                                                                                                                                                                                                                                                                                                                                                                                                                                                                                                                                                                                                                                                                                                                                                          |              |              |              |              |              |              |              |              |              |             |              |              |              |              |              |              |             |              |              |                                                                                                                                                                                                                                                                                                                                                                                                                                                                                                                                                                                                                                                |   |              |              |              |   |              |             |             |   |              |             |             |   |              |              |              |   |              |              |              |   |             |             |              |
| <p><b>C<sub>4</sub>H<sub>4</sub><sup>-</sup></b></p> <p>CCSD(T) Energy = -154.22554 a. u.</p> <table border="1"> <tbody> <tr><td>6</td><td>0.711003000</td><td>0.002965000</td><td>-0.001196000</td></tr> <tr><td>6</td><td>-0.711017000</td><td>-0.003050000</td><td>-0.000525000</td></tr> <tr><td>6</td><td>-1.985053000</td><td>-0.006590000</td><td>-0.001082000</td></tr> <tr><td>6</td><td>1.985040000</td><td>0.006501000</td><td>-0.000893000</td></tr> <tr><td>1</td><td>-5.286214000</td><td>0.012690000</td><td>0.006397000</td></tr> <tr><td>1</td><td>-4.504673000</td><td>0.005833000</td><td>0.004649000</td></tr> <tr><td>1</td><td>5.286293000</td><td>-0.012093000</td><td>0.006647000</td></tr> <tr><td>1</td><td>4.504753000</td><td>-0.005393000</td><td>0.004489000</td></tr> </tbody> </table>                                                                                                                                                                                                                                                                                                                                                                                                                             | 6            | 0.711003000  | 0.002965000  | -0.001196000 | 6 | -0.711017000 | -0.003050000 | -0.000525000 | 6 | -1.985053000 | -0.006590000 | -0.001082000 | 6 | 1.985040000 | 0.006501000  | -0.000893000 | 1 | -5.286214000 | 0.012690000  | 0.006397000  | 1 | -4.504673000 | 0.005833000  | 0.004649000 | 1 | 5.286293000  | -0.012093000 | 0.006647000  | 1 | 4.504753000  | -0.005393000 | 0.004489000  | <p><b>C<sub>4</sub>H<sub>6</sub><sup>-</sup></b></p> <p>CCSD(T) Energy = -155.40368 a. u.</p> <table border="1"> <tbody> <tr><td>6</td><td>-0.450966000</td><td>-0.109221000</td><td>-0.000821000</td></tr> <tr><td>6</td><td>0.968808000</td><td>-0.038362000</td><td>0.000116000</td></tr> <tr><td>6</td><td>2.240068000</td><td>0.041589000</td><td>-0.000744000</td></tr> <tr><td>6</td><td>-1.721254000</td><td>-0.196404000</td><td>-0.000310000</td></tr> <tr><td>1</td><td>5.543659000</td><td>0.173406000</td><td>0.003189000</td></tr> <tr><td>1</td><td>4.763186000</td><td>0.141589000</td><td>0.002006000</td></tr> <tr><td>1</td><td>-3.512956000</td><td>1.564237000</td><td>0.000545000</td></tr> <tr><td>1</td><td>-4.076739000</td><td>2.100800000</td><td>0.000915000</td></tr> <tr><td>1</td><td>-4.841279000</td><td>-1.199001000</td><td>0.002285000</td></tr> <tr><td>1</td><td>-4.095809000</td><td>-0.966650000</td><td>0.001616000</td></tr> </tbody> </table> | 6            | -0.450966000 | -0.109221000 | -0.000821000 | 6            | 0.968808000  | -0.038362000 | 0.000116000  | 6            | 2.240068000 | 0.041589000  | -0.000744000 | 6            | -1.721254000 | -0.196404000 | -0.000310000 | 1           | 5.543659000  | 0.173406000  | 0.003189000                                                                                                                                                                                                                                                                                                                                                                                                                                                                                                                                                                                                                                    | 1 | 4.763186000  | 0.141589000  | 0.002006000  | 1 | -3.512956000 | 1.564237000 | 0.000545000 | 1 | -4.076739000 | 2.100800000 | 0.000915000 | 1 | -4.841279000 | -1.199001000 | 0.002285000  | 1 | -4.095809000 | -0.966650000 | 0.001616000  |   |             |             |              |
| 6                                                                                                                                                                                                                                                                                                                                                                                                                                                                                                                                                                                                                                                                                                                                                                                                                                                                                                                                                                                                                                                                                                                                                                                                                                                  | 0.711003000  | 0.002965000  | -0.001196000 |              |   |              |              |              |   |              |              |              |   |             |              |              |   |              |              |              |   |              |              |             |   |              |              |              |   |              |              |              |                                                                                                                                                                                                                                                                                                                                                                                                                                                                                                                                                                                                                                                                                                                                                                                                                                                                                                                                                                                          |              |              |              |              |              |              |              |              |              |             |              |              |              |              |              |              |             |              |              |                                                                                                                                                                                                                                                                                                                                                                                                                                                                                                                                                                                                                                                |   |              |              |              |   |              |             |             |   |              |             |             |   |              |              |              |   |              |              |              |   |             |             |              |
| 6                                                                                                                                                                                                                                                                                                                                                                                                                                                                                                                                                                                                                                                                                                                                                                                                                                                                                                                                                                                                                                                                                                                                                                                                                                                  | -0.711017000 | -0.003050000 | -0.000525000 |              |   |              |              |              |   |              |              |              |   |             |              |              |   |              |              |              |   |              |              |             |   |              |              |              |   |              |              |              |                                                                                                                                                                                                                                                                                                                                                                                                                                                                                                                                                                                                                                                                                                                                                                                                                                                                                                                                                                                          |              |              |              |              |              |              |              |              |              |             |              |              |              |              |              |              |             |              |              |                                                                                                                                                                                                                                                                                                                                                                                                                                                                                                                                                                                                                                                |   |              |              |              |   |              |             |             |   |              |             |             |   |              |              |              |   |              |              |              |   |             |             |              |
| 6                                                                                                                                                                                                                                                                                                                                                                                                                                                                                                                                                                                                                                                                                                                                                                                                                                                                                                                                                                                                                                                                                                                                                                                                                                                  | -1.985053000 | -0.006590000 | -0.001082000 |              |   |              |              |              |   |              |              |              |   |             |              |              |   |              |              |              |   |              |              |             |   |              |              |              |   |              |              |              |                                                                                                                                                                                                                                                                                                                                                                                                                                                                                                                                                                                                                                                                                                                                                                                                                                                                                                                                                                                          |              |              |              |              |              |              |              |              |              |             |              |              |              |              |              |              |             |              |              |                                                                                                                                                                                                                                                                                                                                                                                                                                                                                                                                                                                                                                                |   |              |              |              |   |              |             |             |   |              |             |             |   |              |              |              |   |              |              |              |   |             |             |              |
| 6                                                                                                                                                                                                                                                                                                                                                                                                                                                                                                                                                                                                                                                                                                                                                                                                                                                                                                                                                                                                                                                                                                                                                                                                                                                  | 1.985040000  | 0.006501000  | -0.000893000 |              |   |              |              |              |   |              |              |              |   |             |              |              |   |              |              |              |   |              |              |             |   |              |              |              |   |              |              |              |                                                                                                                                                                                                                                                                                                                                                                                                                                                                                                                                                                                                                                                                                                                                                                                                                                                                                                                                                                                          |              |              |              |              |              |              |              |              |              |             |              |              |              |              |              |              |             |              |              |                                                                                                                                                                                                                                                                                                                                                                                                                                                                                                                                                                                                                                                |   |              |              |              |   |              |             |             |   |              |             |             |   |              |              |              |   |              |              |              |   |             |             |              |
| 1                                                                                                                                                                                                                                                                                                                                                                                                                                                                                                                                                                                                                                                                                                                                                                                                                                                                                                                                                                                                                                                                                                                                                                                                                                                  | -5.286214000 | 0.012690000  | 0.006397000  |              |   |              |              |              |   |              |              |              |   |             |              |              |   |              |              |              |   |              |              |             |   |              |              |              |   |              |              |              |                                                                                                                                                                                                                                                                                                                                                                                                                                                                                                                                                                                                                                                                                                                                                                                                                                                                                                                                                                                          |              |              |              |              |              |              |              |              |              |             |              |              |              |              |              |              |             |              |              |                                                                                                                                                                                                                                                                                                                                                                                                                                                                                                                                                                                                                                                |   |              |              |              |   |              |             |             |   |              |             |             |   |              |              |              |   |              |              |              |   |             |             |              |
| 1                                                                                                                                                                                                                                                                                                                                                                                                                                                                                                                                                                                                                                                                                                                                                                                                                                                                                                                                                                                                                                                                                                                                                                                                                                                  | -4.504673000 | 0.005833000  | 0.004649000  |              |   |              |              |              |   |              |              |              |   |             |              |              |   |              |              |              |   |              |              |             |   |              |              |              |   |              |              |              |                                                                                                                                                                                                                                                                                                                                                                                                                                                                                                                                                                                                                                                                                                                                                                                                                                                                                                                                                                                          |              |              |              |              |              |              |              |              |              |             |              |              |              |              |              |              |             |              |              |                                                                                                                                                                                                                                                                                                                                                                                                                                                                                                                                                                                                                                                |   |              |              |              |   |              |             |             |   |              |             |             |   |              |              |              |   |              |              |              |   |             |             |              |
| 1                                                                                                                                                                                                                                                                                                                                                                                                                                                                                                                                                                                                                                                                                                                                                                                                                                                                                                                                                                                                                                                                                                                                                                                                                                                  | 5.286293000  | -0.012093000 | 0.006647000  |              |   |              |              |              |   |              |              |              |   |             |              |              |   |              |              |              |   |              |              |             |   |              |              |              |   |              |              |              |                                                                                                                                                                                                                                                                                                                                                                                                                                                                                                                                                                                                                                                                                                                                                                                                                                                                                                                                                                                          |              |              |              |              |              |              |              |              |              |             |              |              |              |              |              |              |             |              |              |                                                                                                                                                                                                                                                                                                                                                                                                                                                                                                                                                                                                                                                |   |              |              |              |   |              |             |             |   |              |             |             |   |              |              |              |   |              |              |              |   |             |             |              |
| 1                                                                                                                                                                                                                                                                                                                                                                                                                                                                                                                                                                                                                                                                                                                                                                                                                                                                                                                                                                                                                                                                                                                                                                                                                                                  | 4.504753000  | -0.005393000 | 0.004489000  |              |   |              |              |              |   |              |              |              |   |             |              |              |   |              |              |              |   |              |              |             |   |              |              |              |   |              |              |              |                                                                                                                                                                                                                                                                                                                                                                                                                                                                                                                                                                                                                                                                                                                                                                                                                                                                                                                                                                                          |              |              |              |              |              |              |              |              |              |             |              |              |              |              |              |              |             |              |              |                                                                                                                                                                                                                                                                                                                                                                                                                                                                                                                                                                                                                                                |   |              |              |              |   |              |             |             |   |              |             |             |   |              |              |              |   |              |              |              |   |             |             |              |
| 6                                                                                                                                                                                                                                                                                                                                                                                                                                                                                                                                                                                                                                                                                                                                                                                                                                                                                                                                                                                                                                                                                                                                                                                                                                                  | -0.450966000 | -0.109221000 | -0.000821000 |              |   |              |              |              |   |              |              |              |   |             |              |              |   |              |              |              |   |              |              |             |   |              |              |              |   |              |              |              |                                                                                                                                                                                                                                                                                                                                                                                                                                                                                                                                                                                                                                                                                                                                                                                                                                                                                                                                                                                          |              |              |              |              |              |              |              |              |              |             |              |              |              |              |              |              |             |              |              |                                                                                                                                                                                                                                                                                                                                                                                                                                                                                                                                                                                                                                                |   |              |              |              |   |              |             |             |   |              |             |             |   |              |              |              |   |              |              |              |   |             |             |              |
| 6                                                                                                                                                                                                                                                                                                                                                                                                                                                                                                                                                                                                                                                                                                                                                                                                                                                                                                                                                                                                                                                                                                                                                                                                                                                  | 0.968808000  | -0.038362000 | 0.000116000  |              |   |              |              |              |   |              |              |              |   |             |              |              |   |              |              |              |   |              |              |             |   |              |              |              |   |              |              |              |                                                                                                                                                                                                                                                                                                                                                                                                                                                                                                                                                                                                                                                                                                                                                                                                                                                                                                                                                                                          |              |              |              |              |              |              |              |              |              |             |              |              |              |              |              |              |             |              |              |                                                                                                                                                                                                                                                                                                                                                                                                                                                                                                                                                                                                                                                |   |              |              |              |   |              |             |             |   |              |             |             |   |              |              |              |   |              |              |              |   |             |             |              |
| 6                                                                                                                                                                                                                                                                                                                                                                                                                                                                                                                                                                                                                                                                                                                                                                                                                                                                                                                                                                                                                                                                                                                                                                                                                                                  | 2.240068000  | 0.041589000  | -0.000744000 |              |   |              |              |              |   |              |              |              |   |             |              |              |   |              |              |              |   |              |              |             |   |              |              |              |   |              |              |              |                                                                                                                                                                                                                                                                                                                                                                                                                                                                                                                                                                                                                                                                                                                                                                                                                                                                                                                                                                                          |              |              |              |              |              |              |              |              |              |             |              |              |              |              |              |              |             |              |              |                                                                                                                                                                                                                                                                                                                                                                                                                                                                                                                                                                                                                                                |   |              |              |              |   |              |             |             |   |              |             |             |   |              |              |              |   |              |              |              |   |             |             |              |
| 6                                                                                                                                                                                                                                                                                                                                                                                                                                                                                                                                                                                                                                                                                                                                                                                                                                                                                                                                                                                                                                                                                                                                                                                                                                                  | -1.721254000 | -0.196404000 | -0.000310000 |              |   |              |              |              |   |              |              |              |   |             |              |              |   |              |              |              |   |              |              |             |   |              |              |              |   |              |              |              |                                                                                                                                                                                                                                                                                                                                                                                                                                                                                                                                                                                                                                                                                                                                                                                                                                                                                                                                                                                          |              |              |              |              |              |              |              |              |              |             |              |              |              |              |              |              |             |              |              |                                                                                                                                                                                                                                                                                                                                                                                                                                                                                                                                                                                                                                                |   |              |              |              |   |              |             |             |   |              |             |             |   |              |              |              |   |              |              |              |   |             |             |              |
| 1                                                                                                                                                                                                                                                                                                                                                                                                                                                                                                                                                                                                                                                                                                                                                                                                                                                                                                                                                                                                                                                                                                                                                                                                                                                  | 5.543659000  | 0.173406000  | 0.003189000  |              |   |              |              |              |   |              |              |              |   |             |              |              |   |              |              |              |   |              |              |             |   |              |              |              |   |              |              |              |                                                                                                                                                                                                                                                                                                                                                                                                                                                                                                                                                                                                                                                                                                                                                                                                                                                                                                                                                                                          |              |              |              |              |              |              |              |              |              |             |              |              |              |              |              |              |             |              |              |                                                                                                                                                                                                                                                                                                                                                                                                                                                                                                                                                                                                                                                |   |              |              |              |   |              |             |             |   |              |             |             |   |              |              |              |   |              |              |              |   |             |             |              |
| 1                                                                                                                                                                                                                                                                                                                                                                                                                                                                                                                                                                                                                                                                                                                                                                                                                                                                                                                                                                                                                                                                                                                                                                                                                                                  | 4.763186000  | 0.141589000  | 0.002006000  |              |   |              |              |              |   |              |              |              |   |             |              |              |   |              |              |              |   |              |              |             |   |              |              |              |   |              |              |              |                                                                                                                                                                                                                                                                                                                                                                                                                                                                                                                                                                                                                                                                                                                                                                                                                                                                                                                                                                                          |              |              |              |              |              |              |              |              |              |             |              |              |              |              |              |              |             |              |              |                                                                                                                                                                                                                                                                                                                                                                                                                                                                                                                                                                                                                                                |   |              |              |              |   |              |             |             |   |              |             |             |   |              |              |              |   |              |              |              |   |             |             |              |
| 1                                                                                                                                                                                                                                                                                                                                                                                                                                                                                                                                                                                                                                                                                                                                                                                                                                                                                                                                                                                                                                                                                                                                                                                                                                                  | -3.512956000 | 1.564237000  | 0.000545000  |              |   |              |              |              |   |              |              |              |   |             |              |              |   |              |              |              |   |              |              |             |   |              |              |              |   |              |              |              |                                                                                                                                                                                                                                                                                                                                                                                                                                                                                                                                                                                                                                                                                                                                                                                                                                                                                                                                                                                          |              |              |              |              |              |              |              |              |              |             |              |              |              |              |              |              |             |              |              |                                                                                                                                                                                                                                                                                                                                                                                                                                                                                                                                                                                                                                                |   |              |              |              |   |              |             |             |   |              |             |             |   |              |              |              |   |              |              |              |   |             |             |              |
| 1                                                                                                                                                                                                                                                                                                                                                                                                                                                                                                                                                                                                                                                                                                                                                                                                                                                                                                                                                                                                                                                                                                                                                                                                                                                  | -4.076739000 | 2.100800000  | 0.000915000  |              |   |              |              |              |   |              |              |              |   |             |              |              |   |              |              |              |   |              |              |             |   |              |              |              |   |              |              |              |                                                                                                                                                                                                                                                                                                                                                                                                                                                                                                                                                                                                                                                                                                                                                                                                                                                                                                                                                                                          |              |              |              |              |              |              |              |              |              |             |              |              |              |              |              |              |             |              |              |                                                                                                                                                                                                                                                                                                                                                                                                                                                                                                                                                                                                                                                |   |              |              |              |   |              |             |             |   |              |             |             |   |              |              |              |   |              |              |              |   |             |             |              |
| 1                                                                                                                                                                                                                                                                                                                                                                                                                                                                                                                                                                                                                                                                                                                                                                                                                                                                                                                                                                                                                                                                                                                                                                                                                                                  | -4.841279000 | -1.199001000 | 0.002285000  |              |   |              |              |              |   |              |              |              |   |             |              |              |   |              |              |              |   |              |              |             |   |              |              |              |   |              |              |              |                                                                                                                                                                                                                                                                                                                                                                                                                                                                                                                                                                                                                                                                                                                                                                                                                                                                                                                                                                                          |              |              |              |              |              |              |              |              |              |             |              |              |              |              |              |              |             |              |              |                                                                                                                                                                                                                                                                                                                                                                                                                                                                                                                                                                                                                                                |   |              |              |              |   |              |             |             |   |              |             |             |   |              |              |              |   |              |              |              |   |             |             |              |
| 1                                                                                                                                                                                                                                                                                                                                                                                                                                                                                                                                                                                                                                                                                                                                                                                                                                                                                                                                                                                                                                                                                                                                                                                                                                                  | -4.095809000 | -0.966650000 | 0.001616000  |              |   |              |              |              |   |              |              |              |   |             |              |              |   |              |              |              |   |              |              |             |   |              |              |              |   |              |              |              |                                                                                                                                                                                                                                                                                                                                                                                                                                                                                                                                                                                                                                                                                                                                                                                                                                                                                                                                                                                          |              |              |              |              |              |              |              |              |              |             |              |              |              |              |              |              |             |              |              |                                                                                                                                                                                                                                                                                                                                                                                                                                                                                                                                                                                                                                                |   |              |              |              |   |              |             |             |   |              |             |             |   |              |              |              |   |              |              |              |   |             |             |              |
| <p><b>C<sub>6</sub>H<sub>2</sub><sup>-</sup></b></p> <p>CCSD(T) Energy = -229.11706 a. u.</p> <table border="1"> <tbody> <tr><td>6</td><td>-3.627536000</td><td>0.012768000</td><td>-0.004992000</td></tr> <tr><td>6</td><td>-2.355122000</td><td>0.018010000</td><td>0.003736000</td></tr> <tr><td>6</td><td>-0.951931000</td><td>-0.025842000</td><td>-0.010885000</td></tr> <tr><td>6</td><td>0.292874000</td><td>0.016486000</td><td>0.014986000</td></tr> <tr><td>6</td><td>1.696096000</td><td>-0.029040000</td><td>-0.000926000</td></tr> <tr><td>6</td><td>2.967504000</td><td>-0.020688000</td><td>0.003676000</td></tr> <tr><td>1</td><td>5.546559000</td><td>0.069652000</td><td>-0.015282000</td></tr> <tr><td>1</td><td>6.322126000</td><td>0.100184000</td><td>-0.018287000</td></tr> </tbody> </table>                                                                                                                                                                                                                                                                                                                                                                                                                              | 6            | -3.627536000 | 0.012768000  | -0.004992000 | 6 | -2.355122000 | 0.018010000  | 0.003736000  | 6 | -0.951931000 | -0.025842000 | -0.010885000 | 6 | 0.292874000 | 0.016486000  | 0.014986000  | 6 | 1.696096000  | -0.029040000 | -0.000926000 | 6 | 2.967504000  | -0.020688000 | 0.003676000 | 1 | 5.546559000  | 0.069652000  | -0.015282000 | 1 | 6.322126000  | 0.100184000  | -0.018287000 | <p><b>C<sub>6</sub>H<sub>4</sub><sup>-</sup></b></p> <p>CCSD(T) Energy = -230.29447 a. u.</p> <table border="1"> <tbody> <tr><td>6</td><td>3.296472000</td><td>0.026467000</td><td>0.000339000</td></tr> <tr><td>6</td><td>2.025084000</td><td>0.030919000</td><td>-0.000597000</td></tr> <tr><td>6</td><td>0.622406000</td><td>-0.021373000</td><td>0.000083000</td></tr> <tr><td>6</td><td>-0.622421000</td><td>0.020873000</td><td>-0.000410000</td></tr> <tr><td>6</td><td>-2.025100000</td><td>-0.031375000</td><td>-0.000409000</td></tr> <tr><td>6</td><td>-3.296487000</td><td>-0.026681000</td><td>0.000083000</td></tr> <tr><td>1</td><td>-5.878206000</td><td>0.053341000</td><td>0.001714000</td></tr> <tr><td>1</td><td>-6.653755000</td><td>0.080219000</td><td>0.001395000</td></tr> <tr><td>1</td><td>5.878343000</td><td>-0.050258000</td><td>0.001214000</td></tr> <tr><td>1</td><td>6.653894000</td><td>-0.076287000</td><td>0.001143000</td></tr> </tbody> </table>  | 6            | 3.296472000  | 0.026467000  | 0.000339000  | 6            | 2.025084000  | 0.030919000  | -0.000597000 | 6            | 0.622406000 | -0.021373000 | 0.000083000  | 6            | -0.622421000 | 0.020873000  | -0.000410000 | 6           | -2.025100000 | -0.031375000 | -0.000409000                                                                                                                                                                                                                                                                                                                                                                                                                                                                                                                                                                                                                                   | 6 | -3.296487000 | -0.026681000 | 0.000083000  | 1 | -5.878206000 | 0.053341000 | 0.001714000 | 1 | -6.653755000 | 0.080219000 | 0.001395000 | 1 | 5.878343000  | -0.050258000 | 0.001214000  | 1 | 6.653894000  | -0.076287000 | 0.001143000  |   |             |             |              |
| 6                                                                                                                                                                                                                                                                                                                                                                                                                                                                                                                                                                                                                                                                                                                                                                                                                                                                                                                                                                                                                                                                                                                                                                                                                                                  | -3.627536000 | 0.012768000  | -0.004992000 |              |   |              |              |              |   |              |              |              |   |             |              |              |   |              |              |              |   |              |              |             |   |              |              |              |   |              |              |              |                                                                                                                                                                                                                                                                                                                                                                                                                                                                                                                                                                                                                                                                                                                                                                                                                                                                                                                                                                                          |              |              |              |              |              |              |              |              |              |             |              |              |              |              |              |              |             |              |              |                                                                                                                                                                                                                                                                                                                                                                                                                                                                                                                                                                                                                                                |   |              |              |              |   |              |             |             |   |              |             |             |   |              |              |              |   |              |              |              |   |             |             |              |
| 6                                                                                                                                                                                                                                                                                                                                                                                                                                                                                                                                                                                                                                                                                                                                                                                                                                                                                                                                                                                                                                                                                                                                                                                                                                                  | -2.355122000 | 0.018010000  | 0.003736000  |              |   |              |              |              |   |              |              |              |   |             |              |              |   |              |              |              |   |              |              |             |   |              |              |              |   |              |              |              |                                                                                                                                                                                                                                                                                                                                                                                                                                                                                                                                                                                                                                                                                                                                                                                                                                                                                                                                                                                          |              |              |              |              |              |              |              |              |              |             |              |              |              |              |              |              |             |              |              |                                                                                                                                                                                                                                                                                                                                                                                                                                                                                                                                                                                                                                                |   |              |              |              |   |              |             |             |   |              |             |             |   |              |              |              |   |              |              |              |   |             |             |              |
| 6                                                                                                                                                                                                                                                                                                                                                                                                                                                                                                                                                                                                                                                                                                                                                                                                                                                                                                                                                                                                                                                                                                                                                                                                                                                  | -0.951931000 | -0.025842000 | -0.010885000 |              |   |              |              |              |   |              |              |              |   |             |              |              |   |              |              |              |   |              |              |             |   |              |              |              |   |              |              |              |                                                                                                                                                                                                                                                                                                                                                                                                                                                                                                                                                                                                                                                                                                                                                                                                                                                                                                                                                                                          |              |              |              |              |              |              |              |              |              |             |              |              |              |              |              |              |             |              |              |                                                                                                                                                                                                                                                                                                                                                                                                                                                                                                                                                                                                                                                |   |              |              |              |   |              |             |             |   |              |             |             |   |              |              |              |   |              |              |              |   |             |             |              |
| 6                                                                                                                                                                                                                                                                                                                                                                                                                                                                                                                                                                                                                                                                                                                                                                                                                                                                                                                                                                                                                                                                                                                                                                                                                                                  | 0.292874000  | 0.016486000  | 0.014986000  |              |   |              |              |              |   |              |              |              |   |             |              |              |   |              |              |              |   |              |              |             |   |              |              |              |   |              |              |              |                                                                                                                                                                                                                                                                                                                                                                                                                                                                                                                                                                                                                                                                                                                                                                                                                                                                                                                                                                                          |              |              |              |              |              |              |              |              |              |             |              |              |              |              |              |              |             |              |              |                                                                                                                                                                                                                                                                                                                                                                                                                                                                                                                                                                                                                                                |   |              |              |              |   |              |             |             |   |              |             |             |   |              |              |              |   |              |              |              |   |             |             |              |
| 6                                                                                                                                                                                                                                                                                                                                                                                                                                                                                                                                                                                                                                                                                                                                                                                                                                                                                                                                                                                                                                                                                                                                                                                                                                                  | 1.696096000  | -0.029040000 | -0.000926000 |              |   |              |              |              |   |              |              |              |   |             |              |              |   |              |              |              |   |              |              |             |   |              |              |              |   |              |              |              |                                                                                                                                                                                                                                                                                                                                                                                                                                                                                                                                                                                                                                                                                                                                                                                                                                                                                                                                                                                          |              |              |              |              |              |              |              |              |              |             |              |              |              |              |              |              |             |              |              |                                                                                                                                                                                                                                                                                                                                                                                                                                                                                                                                                                                                                                                |   |              |              |              |   |              |             |             |   |              |             |             |   |              |              |              |   |              |              |              |   |             |             |              |
| 6                                                                                                                                                                                                                                                                                                                                                                                                                                                                                                                                                                                                                                                                                                                                                                                                                                                                                                                                                                                                                                                                                                                                                                                                                                                  | 2.967504000  | -0.020688000 | 0.003676000  |              |   |              |              |              |   |              |              |              |   |             |              |              |   |              |              |              |   |              |              |             |   |              |              |              |   |              |              |              |                                                                                                                                                                                                                                                                                                                                                                                                                                                                                                                                                                                                                                                                                                                                                                                                                                                                                                                                                                                          |              |              |              |              |              |              |              |              |              |             |              |              |              |              |              |              |             |              |              |                                                                                                                                                                                                                                                                                                                                                                                                                                                                                                                                                                                                                                                |   |              |              |              |   |              |             |             |   |              |             |             |   |              |              |              |   |              |              |              |   |             |             |              |
| 1                                                                                                                                                                                                                                                                                                                                                                                                                                                                                                                                                                                                                                                                                                                                                                                                                                                                                                                                                                                                                                                                                                                                                                                                                                                  | 5.546559000  | 0.069652000  | -0.015282000 |              |   |              |              |              |   |              |              |              |   |             |              |              |   |              |              |              |   |              |              |             |   |              |              |              |   |              |              |              |                                                                                                                                                                                                                                                                                                                                                                                                                                                                                                                                                                                                                                                                                                                                                                                                                                                                                                                                                                                          |              |              |              |              |              |              |              |              |              |             |              |              |              |              |              |              |             |              |              |                                                                                                                                                                                                                                                                                                                                                                                                                                                                                                                                                                                                                                                |   |              |              |              |   |              |             |             |   |              |             |             |   |              |              |              |   |              |              |              |   |             |             |              |
| 1                                                                                                                                                                                                                                                                                                                                                                                                                                                                                                                                                                                                                                                                                                                                                                                                                                                                                                                                                                                                                                                                                                                                                                                                                                                  | 6.322126000  | 0.100184000  | -0.018287000 |              |   |              |              |              |   |              |              |              |   |             |              |              |   |              |              |              |   |              |              |             |   |              |              |              |   |              |              |              |                                                                                                                                                                                                                                                                                                                                                                                                                                                                                                                                                                                                                                                                                                                                                                                                                                                                                                                                                                                          |              |              |              |              |              |              |              |              |              |             |              |              |              |              |              |              |             |              |              |                                                                                                                                                                                                                                                                                                                                                                                                                                                                                                                                                                                                                                                |   |              |              |              |   |              |             |             |   |              |             |             |   |              |              |              |   |              |              |              |   |             |             |              |
| 6                                                                                                                                                                                                                                                                                                                                                                                                                                                                                                                                                                                                                                                                                                                                                                                                                                                                                                                                                                                                                                                                                                                                                                                                                                                  | 3.296472000  | 0.026467000  | 0.000339000  |              |   |              |              |              |   |              |              |              |   |             |              |              |   |              |              |              |   |              |              |             |   |              |              |              |   |              |              |              |                                                                                                                                                                                                                                                                                                                                                                                                                                                                                                                                                                                                                                                                                                                                                                                                                                                                                                                                                                                          |              |              |              |              |              |              |              |              |              |             |              |              |              |              |              |              |             |              |              |                                                                                                                                                                                                                                                                                                                                                                                                                                                                                                                                                                                                                                                |   |              |              |              |   |              |             |             |   |              |             |             |   |              |              |              |   |              |              |              |   |             |             |              |
| 6                                                                                                                                                                                                                                                                                                                                                                                                                                                                                                                                                                                                                                                                                                                                                                                                                                                                                                                                                                                                                                                                                                                                                                                                                                                  | 2.025084000  | 0.030919000  | -0.000597000 |              |   |              |              |              |   |              |              |              |   |             |              |              |   |              |              |              |   |              |              |             |   |              |              |              |   |              |              |              |                                                                                                                                                                                                                                                                                                                                                                                                                                                                                                                                                                                                                                                                                                                                                                                                                                                                                                                                                                                          |              |              |              |              |              |              |              |              |              |             |              |              |              |              |              |              |             |              |              |                                                                                                                                                                                                                                                                                                                                                                                                                                                                                                                                                                                                                                                |   |              |              |              |   |              |             |             |   |              |             |             |   |              |              |              |   |              |              |              |   |             |             |              |
| 6                                                                                                                                                                                                                                                                                                                                                                                                                                                                                                                                                                                                                                                                                                                                                                                                                                                                                                                                                                                                                                                                                                                                                                                                                                                  | 0.622406000  | -0.021373000 | 0.000083000  |              |   |              |              |              |   |              |              |              |   |             |              |              |   |              |              |              |   |              |              |             |   |              |              |              |   |              |              |              |                                                                                                                                                                                                                                                                                                                                                                                                                                                                                                                                                                                                                                                                                                                                                                                                                                                                                                                                                                                          |              |              |              |              |              |              |              |              |              |             |              |              |              |              |              |              |             |              |              |                                                                                                                                                                                                                                                                                                                                                                                                                                                                                                                                                                                                                                                |   |              |              |              |   |              |             |             |   |              |             |             |   |              |              |              |   |              |              |              |   |             |             |              |
| 6                                                                                                                                                                                                                                                                                                                                                                                                                                                                                                                                                                                                                                                                                                                                                                                                                                                                                                                                                                                                                                                                                                                                                                                                                                                  | -0.622421000 | 0.020873000  | -0.000410000 |              |   |              |              |              |   |              |              |              |   |             |              |              |   |              |              |              |   |              |              |             |   |              |              |              |   |              |              |              |                                                                                                                                                                                                                                                                                                                                                                                                                                                                                                                                                                                                                                                                                                                                                                                                                                                                                                                                                                                          |              |              |              |              |              |              |              |              |              |             |              |              |              |              |              |              |             |              |              |                                                                                                                                                                                                                                                                                                                                                                                                                                                                                                                                                                                                                                                |   |              |              |              |   |              |             |             |   |              |             |             |   |              |              |              |   |              |              |              |   |             |             |              |
| 6                                                                                                                                                                                                                                                                                                                                                                                                                                                                                                                                                                                                                                                                                                                                                                                                                                                                                                                                                                                                                                                                                                                                                                                                                                                  | -2.025100000 | -0.031375000 | -0.000409000 |              |   |              |              |              |   |              |              |              |   |             |              |              |   |              |              |              |   |              |              |             |   |              |              |              |   |              |              |              |                                                                                                                                                                                                                                                                                                                                                                                                                                                                                                                                                                                                                                                                                                                                                                                                                                                                                                                                                                                          |              |              |              |              |              |              |              |              |              |             |              |              |              |              |              |              |             |              |              |                                                                                                                                                                                                                                                                                                                                                                                                                                                                                                                                                                                                                                                |   |              |              |              |   |              |             |             |   |              |             |             |   |              |              |              |   |              |              |              |   |             |             |              |
| 6                                                                                                                                                                                                                                                                                                                                                                                                                                                                                                                                                                                                                                                                                                                                                                                                                                                                                                                                                                                                                                                                                                                                                                                                                                                  | -3.296487000 | -0.026681000 | 0.000083000  |              |   |              |              |              |   |              |              |              |   |             |              |              |   |              |              |              |   |              |              |             |   |              |              |              |   |              |              |              |                                                                                                                                                                                                                                                                                                                                                                                                                                                                                                                                                                                                                                                                                                                                                                                                                                                                                                                                                                                          |              |              |              |              |              |              |              |              |              |             |              |              |              |              |              |              |             |              |              |                                                                                                                                                                                                                                                                                                                                                                                                                                                                                                                                                                                                                                                |   |              |              |              |   |              |             |             |   |              |             |             |   |              |              |              |   |              |              |              |   |             |             |              |
| 1                                                                                                                                                                                                                                                                                                                                                                                                                                                                                                                                                                                                                                                                                                                                                                                                                                                                                                                                                                                                                                                                                                                                                                                                                                                  | -5.878206000 | 0.053341000  | 0.001714000  |              |   |              |              |              |   |              |              |              |   |             |              |              |   |              |              |              |   |              |              |             |   |              |              |              |   |              |              |              |                                                                                                                                                                                                                                                                                                                                                                                                                                                                                                                                                                                                                                                                                                                                                                                                                                                                                                                                                                                          |              |              |              |              |              |              |              |              |              |             |              |              |              |              |              |              |             |              |              |                                                                                                                                                                                                                                                                                                                                                                                                                                                                                                                                                                                                                                                |   |              |              |              |   |              |             |             |   |              |             |             |   |              |              |              |   |              |              |              |   |             |             |              |
| 1                                                                                                                                                                                                                                                                                                                                                                                                                                                                                                                                                                                                                                                                                                                                                                                                                                                                                                                                                                                                                                                                                                                                                                                                                                                  | -6.653755000 | 0.080219000  | 0.001395000  |              |   |              |              |              |   |              |              |              |   |             |              |              |   |              |              |              |   |              |              |             |   |              |              |              |   |              |              |              |                                                                                                                                                                                                                                                                                                                                                                                                                                                                                                                                                                                                                                                                                                                                                                                                                                                                                                                                                                                          |              |              |              |              |              |              |              |              |              |             |              |              |              |              |              |              |             |              |              |                                                                                                                                                                                                                                                                                                                                                                                                                                                                                                                                                                                                                                                |   |              |              |              |   |              |             |             |   |              |             |             |   |              |              |              |   |              |              |              |   |             |             |              |
| 1                                                                                                                                                                                                                                                                                                                                                                                                                                                                                                                                                                                                                                                                                                                                                                                                                                                                                                                                                                                                                                                                                                                                                                                                                                                  | 5.878343000  | -0.050258000 | 0.001214000  |              |   |              |              |              |   |              |              |              |   |             |              |              |   |              |              |              |   |              |              |             |   |              |              |              |   |              |              |              |                                                                                                                                                                                                                                                                                                                                                                                                                                                                                                                                                                                                                                                                                                                                                                                                                                                                                                                                                                                          |              |              |              |              |              |              |              |              |              |             |              |              |              |              |              |              |             |              |              |                                                                                                                                                                                                                                                                                                                                                                                                                                                                                                                                                                                                                                                |   |              |              |              |   |              |             |             |   |              |             |             |   |              |              |              |   |              |              |              |   |             |             |              |
| 1                                                                                                                                                                                                                                                                                                                                                                                                                                                                                                                                                                                                                                                                                                                                                                                                                                                                                                                                                                                                                                                                                                                                                                                                                                                  | 6.653894000  | -0.076287000 | 0.001143000  |              |   |              |              |              |   |              |              |              |   |             |              |              |   |              |              |              |   |              |              |             |   |              |              |              |   |              |              |              |                                                                                                                                                                                                                                                                                                                                                                                                                                                                                                                                                                                                                                                                                                                                                                                                                                                                                                                                                                                          |              |              |              |              |              |              |              |              |              |             |              |              |              |              |              |              |             |              |              |                                                                                                                                                                                                                                                                                                                                                                                                                                                                                                                                                                                                                                                |   |              |              |              |   |              |             |             |   |              |             |             |   |              |              |              |   |              |              |              |   |             |             |              |
| <p><b>C<sub>6</sub>H<sub>6</sub><sup>-</sup></b></p> <p>CCSD(T) Energy = -231.47149 a. u.</p> <table border="1"> <tbody> <tr><td>6</td><td>-3.546164000</td><td>0.033607000</td><td>-0.001222000</td></tr> <tr><td>6</td><td>-2.275844000</td><td>-0.016963000</td><td>-0.003758000</td></tr> <tr><td>6</td><td>-0.872589000</td><td>-0.016050000</td><td>-0.001105000</td></tr> <tr><td>6</td><td>0.369757000</td><td>-0.102200000</td><td>-0.007597000</td></tr> </tbody> </table>                                                                                                                                                                                                                                                                                                                                                                                                                                                                                                                                                                                                                                                                                                                                                               | 6            | -3.546164000 | 0.033607000  | -0.001222000 | 6 | -2.275844000 | -0.016963000 | -0.003758000 | 6 | -0.872589000 | -0.016050000 | -0.001105000 | 6 | 0.369757000 | -0.102200000 | -0.007597000 |   |              |              |              |   |              |              |             |   |              |              |              |   |              |              |              |                                                                                                                                                                                                                                                                                                                                                                                                                                                                                                                                                                                                                                                                                                                                                                                                                                                                                                                                                                                          |              |              |              |              |              |              |              |              |              |             |              |              |              |              |              |              |             |              |              |                                                                                                                                                                                                                                                                                                                                                                                                                                                                                                                                                                                                                                                |   |              |              |              |   |              |             |             |   |              |             |             |   |              |              |              |   |              |              |              |   |             |             |              |
| 6                                                                                                                                                                                                                                                                                                                                                                                                                                                                                                                                                                                                                                                                                                                                                                                                                                                                                                                                                                                                                                                                                                                                                                                                                                                  | -3.546164000 | 0.033607000  | -0.001222000 |              |   |              |              |              |   |              |              |              |   |             |              |              |   |              |              |              |   |              |              |             |   |              |              |              |   |              |              |              |                                                                                                                                                                                                                                                                                                                                                                                                                                                                                                                                                                                                                                                                                                                                                                                                                                                                                                                                                                                          |              |              |              |              |              |              |              |              |              |             |              |              |              |              |              |              |             |              |              |                                                                                                                                                                                                                                                                                                                                                                                                                                                                                                                                                                                                                                                |   |              |              |              |   |              |             |             |   |              |             |             |   |              |              |              |   |              |              |              |   |             |             |              |
| 6                                                                                                                                                                                                                                                                                                                                                                                                                                                                                                                                                                                                                                                                                                                                                                                                                                                                                                                                                                                                                                                                                                                                                                                                                                                  | -2.275844000 | -0.016963000 | -0.003758000 |              |   |              |              |              |   |              |              |              |   |             |              |              |   |              |              |              |   |              |              |             |   |              |              |              |   |              |              |              |                                                                                                                                                                                                                                                                                                                                                                                                                                                                                                                                                                                                                                                                                                                                                                                                                                                                                                                                                                                          |              |              |              |              |              |              |              |              |              |             |              |              |              |              |              |              |             |              |              |                                                                                                                                                                                                                                                                                                                                                                                                                                                                                                                                                                                                                                                |   |              |              |              |   |              |             |             |   |              |             |             |   |              |              |              |   |              |              |              |   |             |             |              |
| 6                                                                                                                                                                                                                                                                                                                                                                                                                                                                                                                                                                                                                                                                                                                                                                                                                                                                                                                                                                                                                                                                                                                                                                                                                                                  | -0.872589000 | -0.016050000 | -0.001105000 |              |   |              |              |              |   |              |              |              |   |             |              |              |   |              |              |              |   |              |              |             |   |              |              |              |   |              |              |              |                                                                                                                                                                                                                                                                                                                                                                                                                                                                                                                                                                                                                                                                                                                                                                                                                                                                                                                                                                                          |              |              |              |              |              |              |              |              |              |             |              |              |              |              |              |              |             |              |              |                                                                                                                                                                                                                                                                                                                                                                                                                                                                                                                                                                                                                                                |   |              |              |              |   |              |             |             |   |              |             |             |   |              |              |              |   |              |              |              |   |             |             |              |
| 6                                                                                                                                                                                                                                                                                                                                                                                                                                                                                                                                                                                                                                                                                                                                                                                                                                                                                                                                                                                                                                                                                                                                                                                                                                                  | 0.369757000  | -0.102200000 | -0.007597000 |              |   |              |              |              |   |              |              |              |   |             |              |              |   |              |              |              |   |              |              |             |   |              |              |              |   |              |              |              |                                                                                                                                                                                                                                                                                                                                                                                                                                                                                                                                                                                                                                                                                                                                                                                                                                                                                                                                                                                          |              |              |              |              |              |              |              |              |              |             |              |              |              |              |              |              |             |              |              |                                                                                                                                                                                                                                                                                                                                                                                                                                                                                                                                                                                                                                                |   |              |              |              |   |              |             |             |   |              |             |             |   |              |              |              |   |              |              |              |   |             |             |              |

|   |              |              |              |  |
|---|--------------|--------------|--------------|--|
| 6 | 1.773309000  | -0.102136000 | -0.001302000 |  |
| 6 | 3.042578000  | -0.162726000 | 0.005482000  |  |
| 1 | 5.495137000  | -0.947770000 | 0.006545000  |  |
| 1 | 6.232396000  | -1.187081000 | 0.008119000  |  |
| 1 | 5.453451000  | 2.212021000  | 0.001149000  |  |
| 1 | 4.902077000  | 1.670282000  | 0.002352000  |  |
| 1 | -6.127682000 | 0.199071000  | 0.014596000  |  |
| 1 | -6.901660000 | 0.252284000  | 0.024254000  |  |
